# Supplementary material for: Predicting selective liver X receptor β agonists using multiple machine learning methods
Source: Royal Society of Chemistry journal article supplement (doi:10.1039/c4mb00718b), 2015-02-20

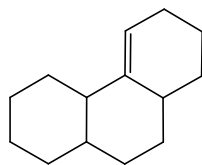

EID:2

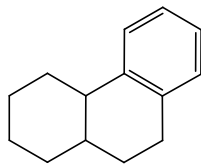

EID:2

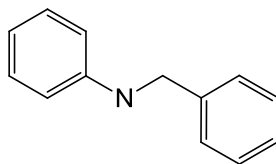

EID:21

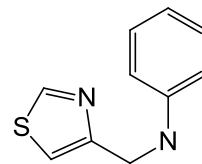

EID:2

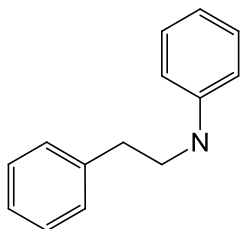

EID:3

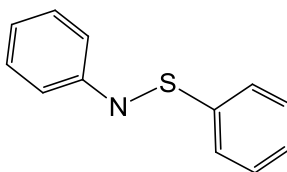

EID:2

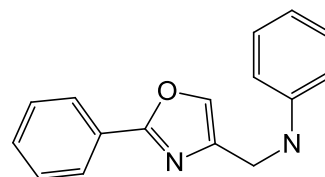

EID:6

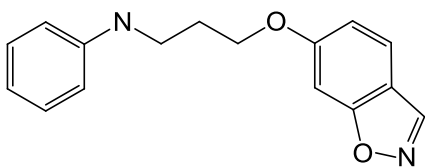

EID:10

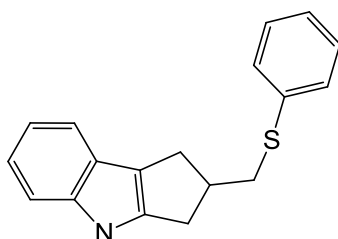

EID:5

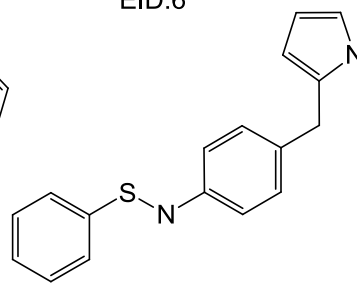

EID:5

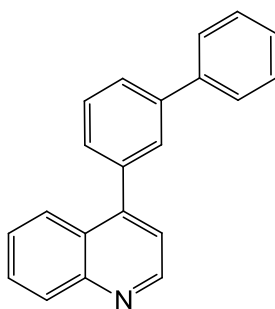

EID:7

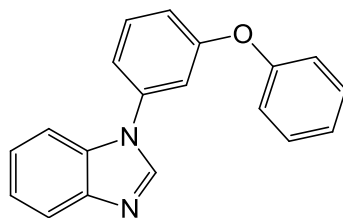

EID:19

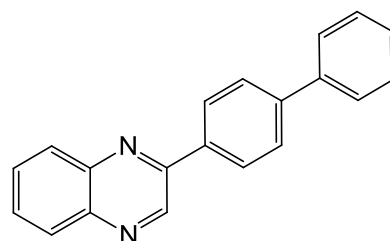

EID:3

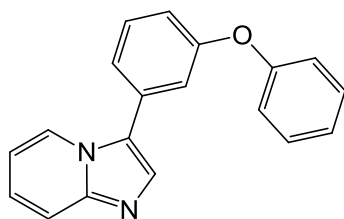

EID:9

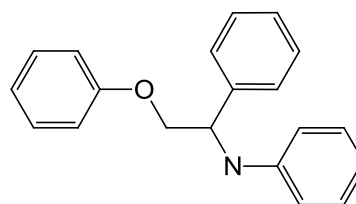

EID:2

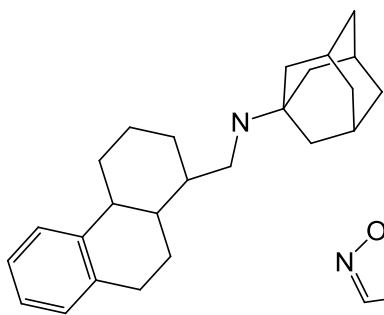

EID:2

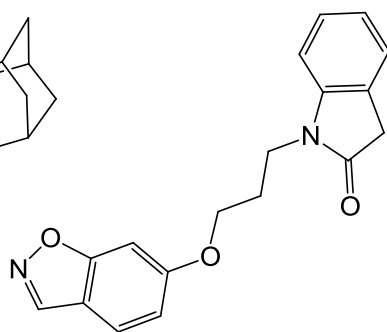

EID:2

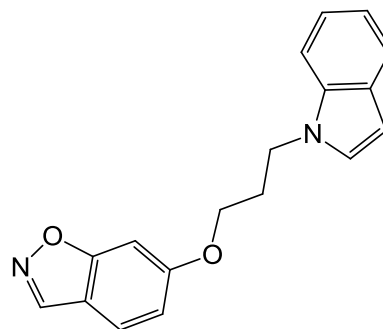

EID:3

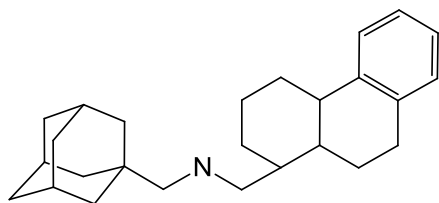

EID:3

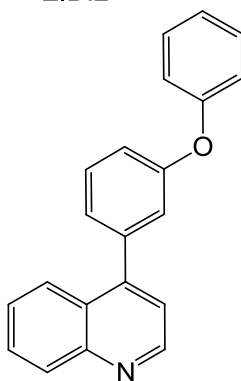

EID:19

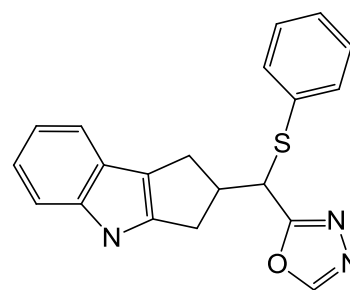

EID:2

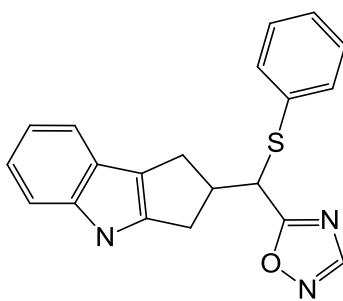

EID:3

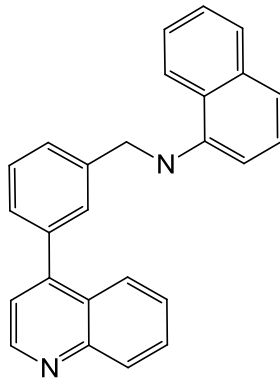

EID:2

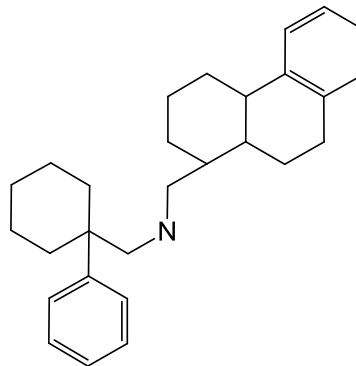

EID:2

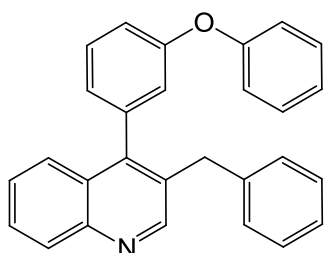

EID:5

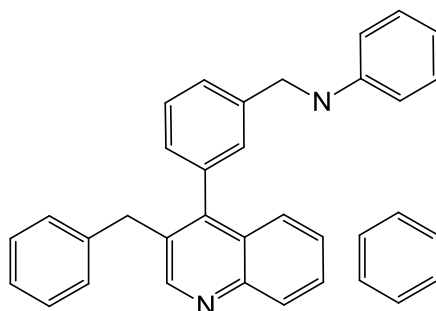

EID:2

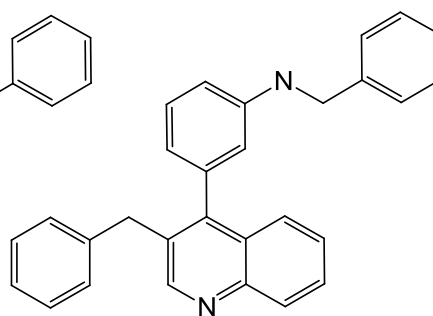

EID:2

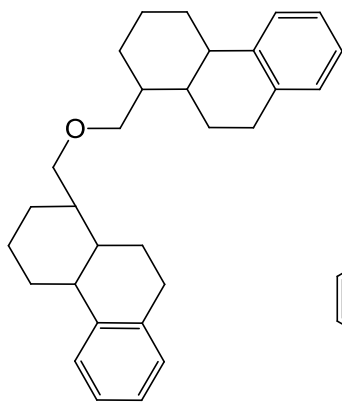

EID:4

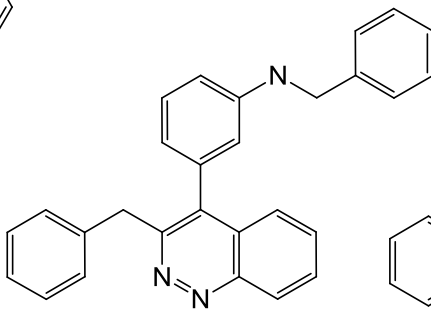

EID:2

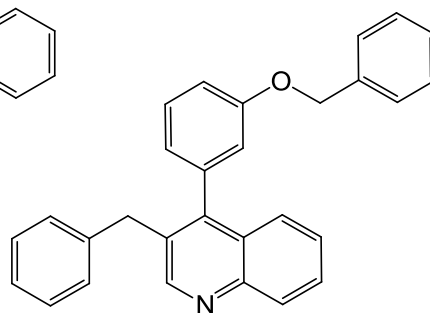

EID:6

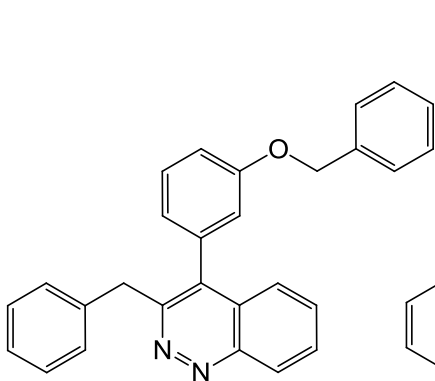

EID:8

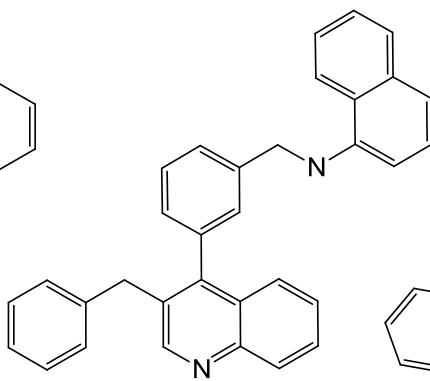

EID:2

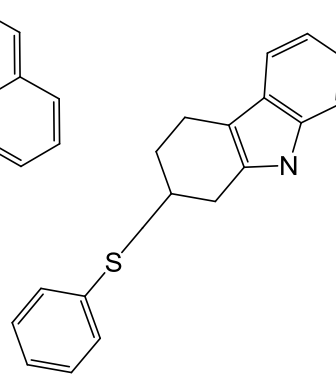

EID:3

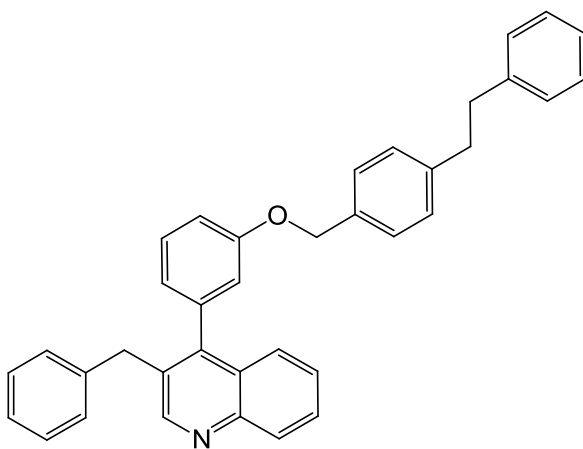

EID:2

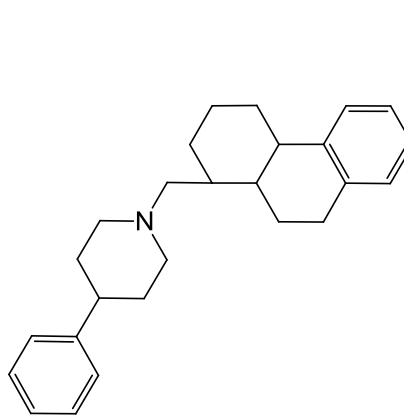

EID:2

EID = 1

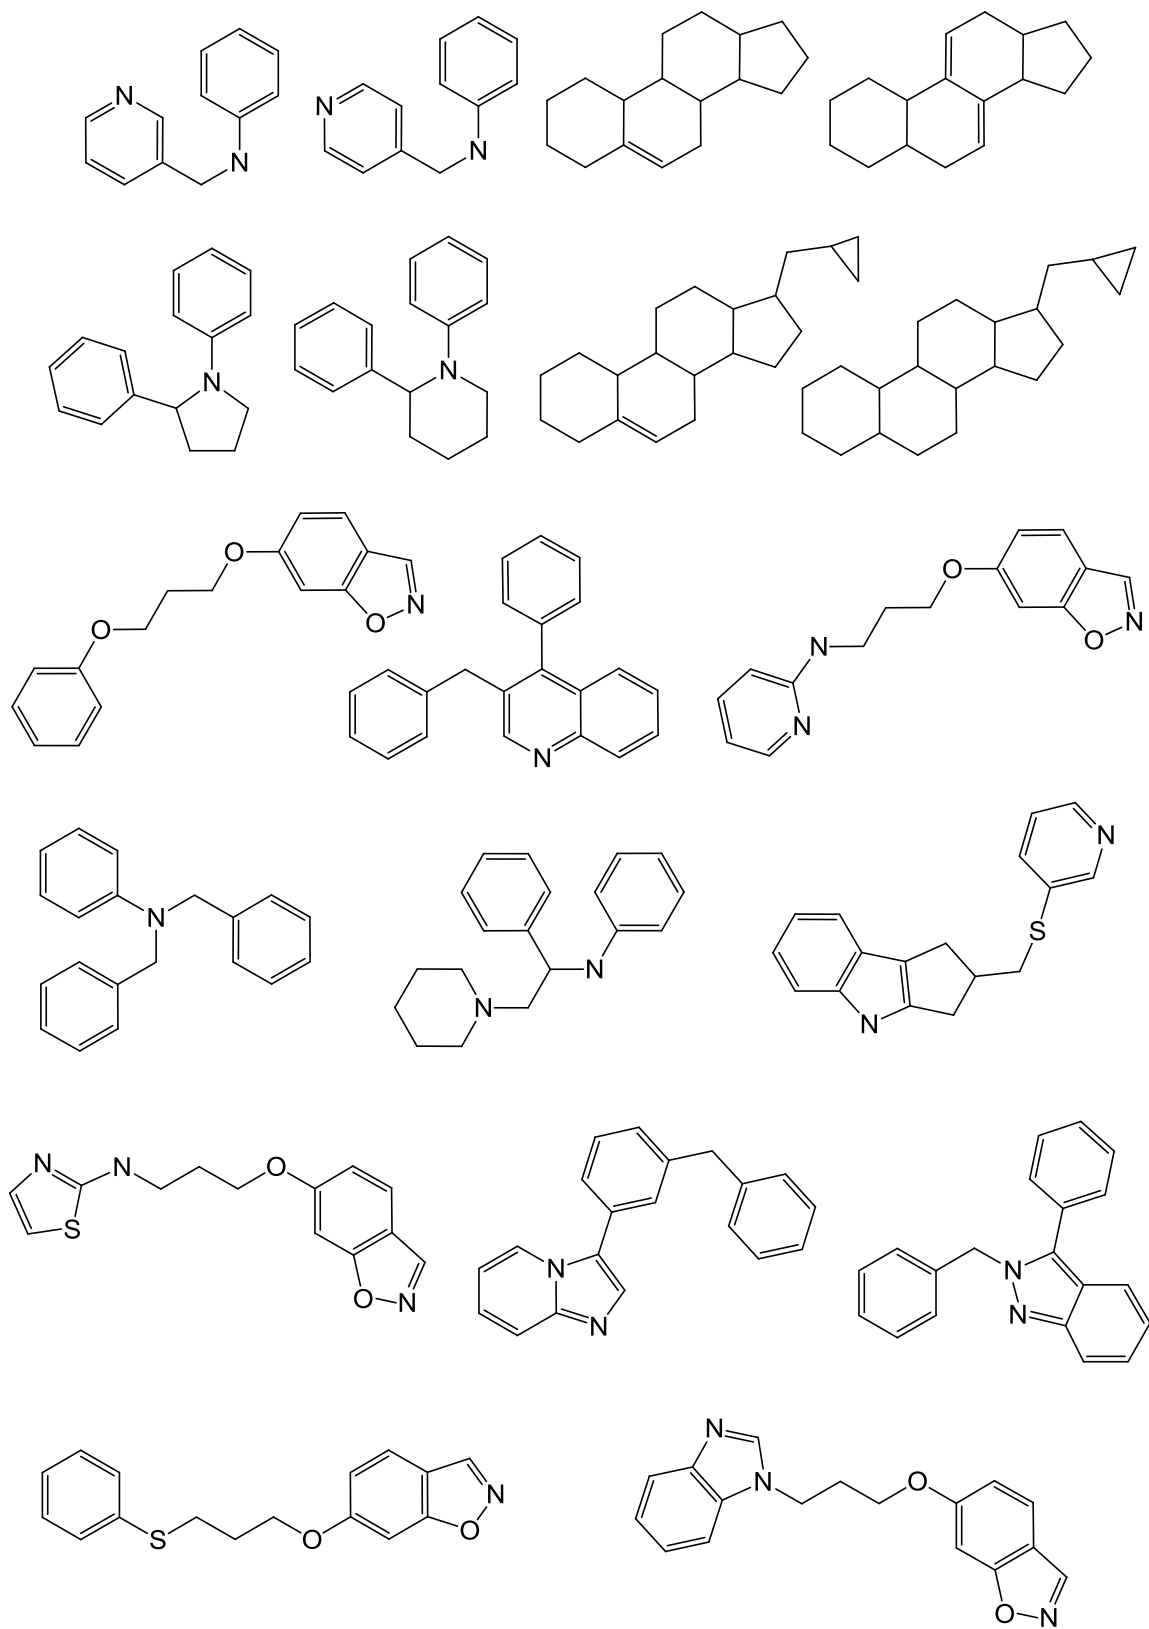

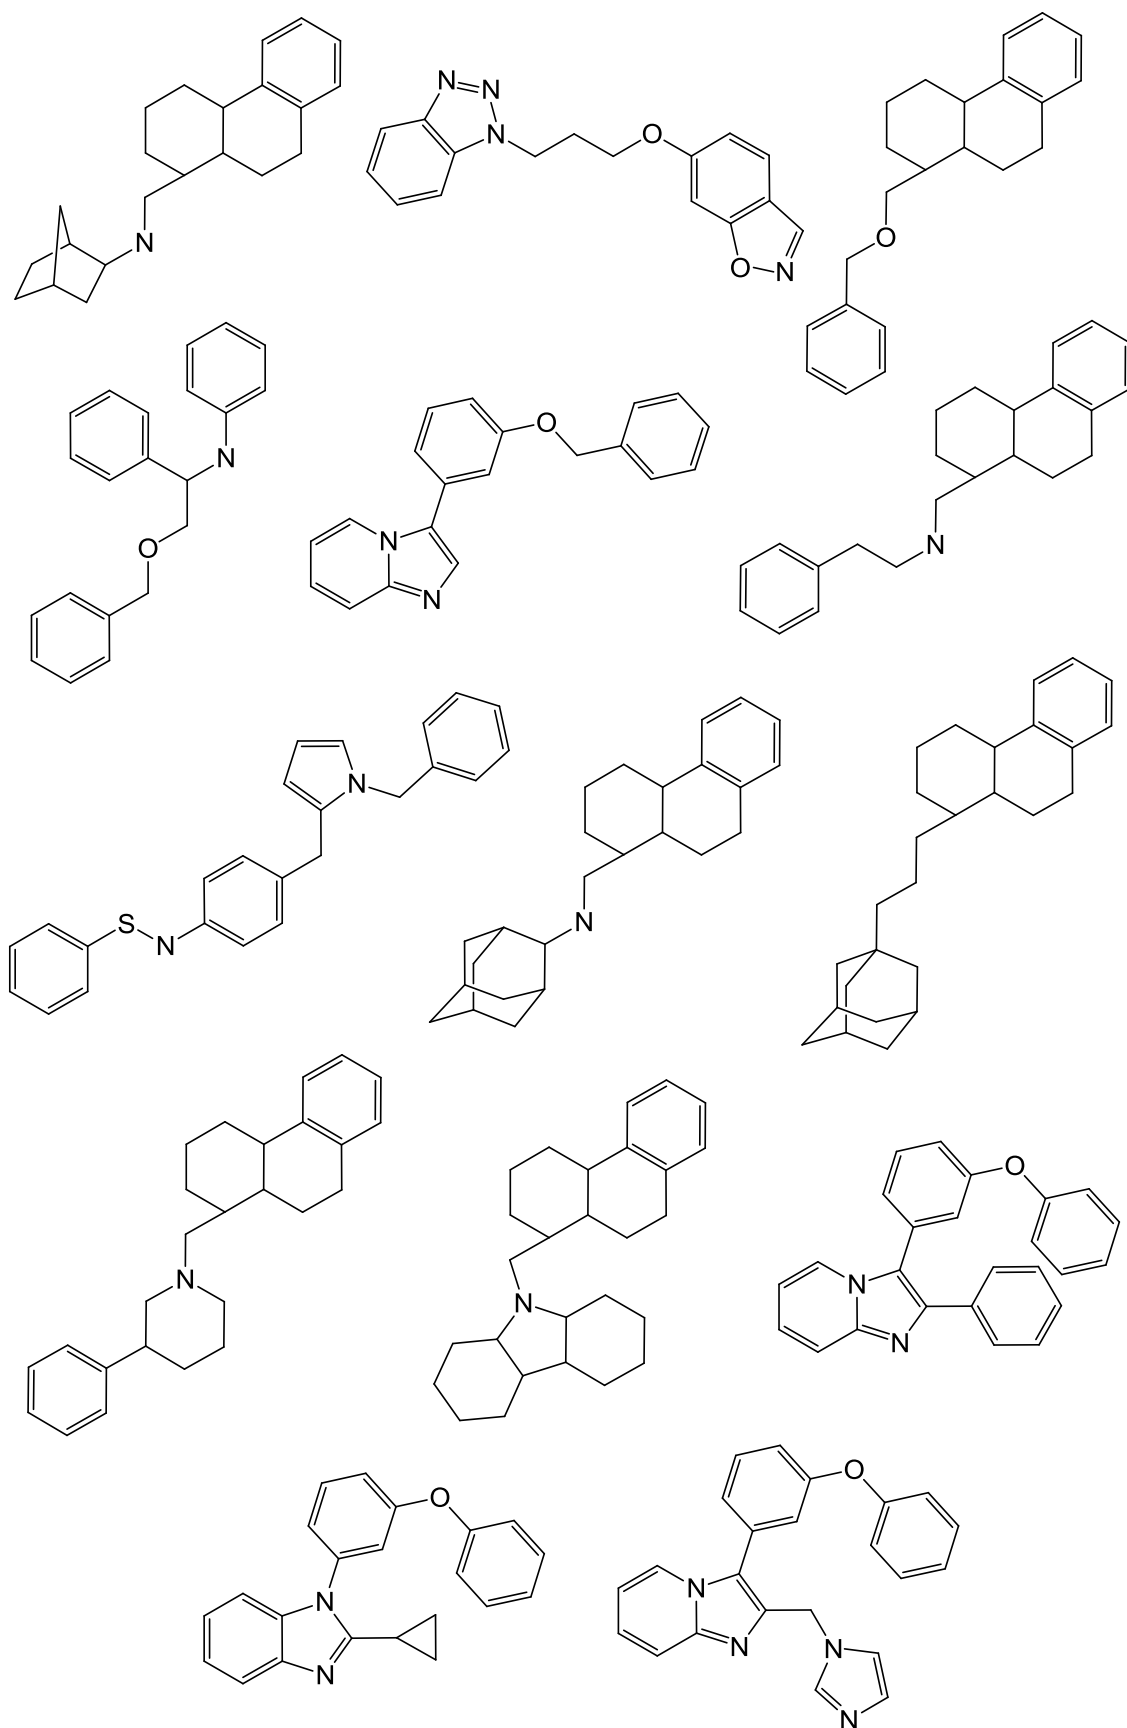

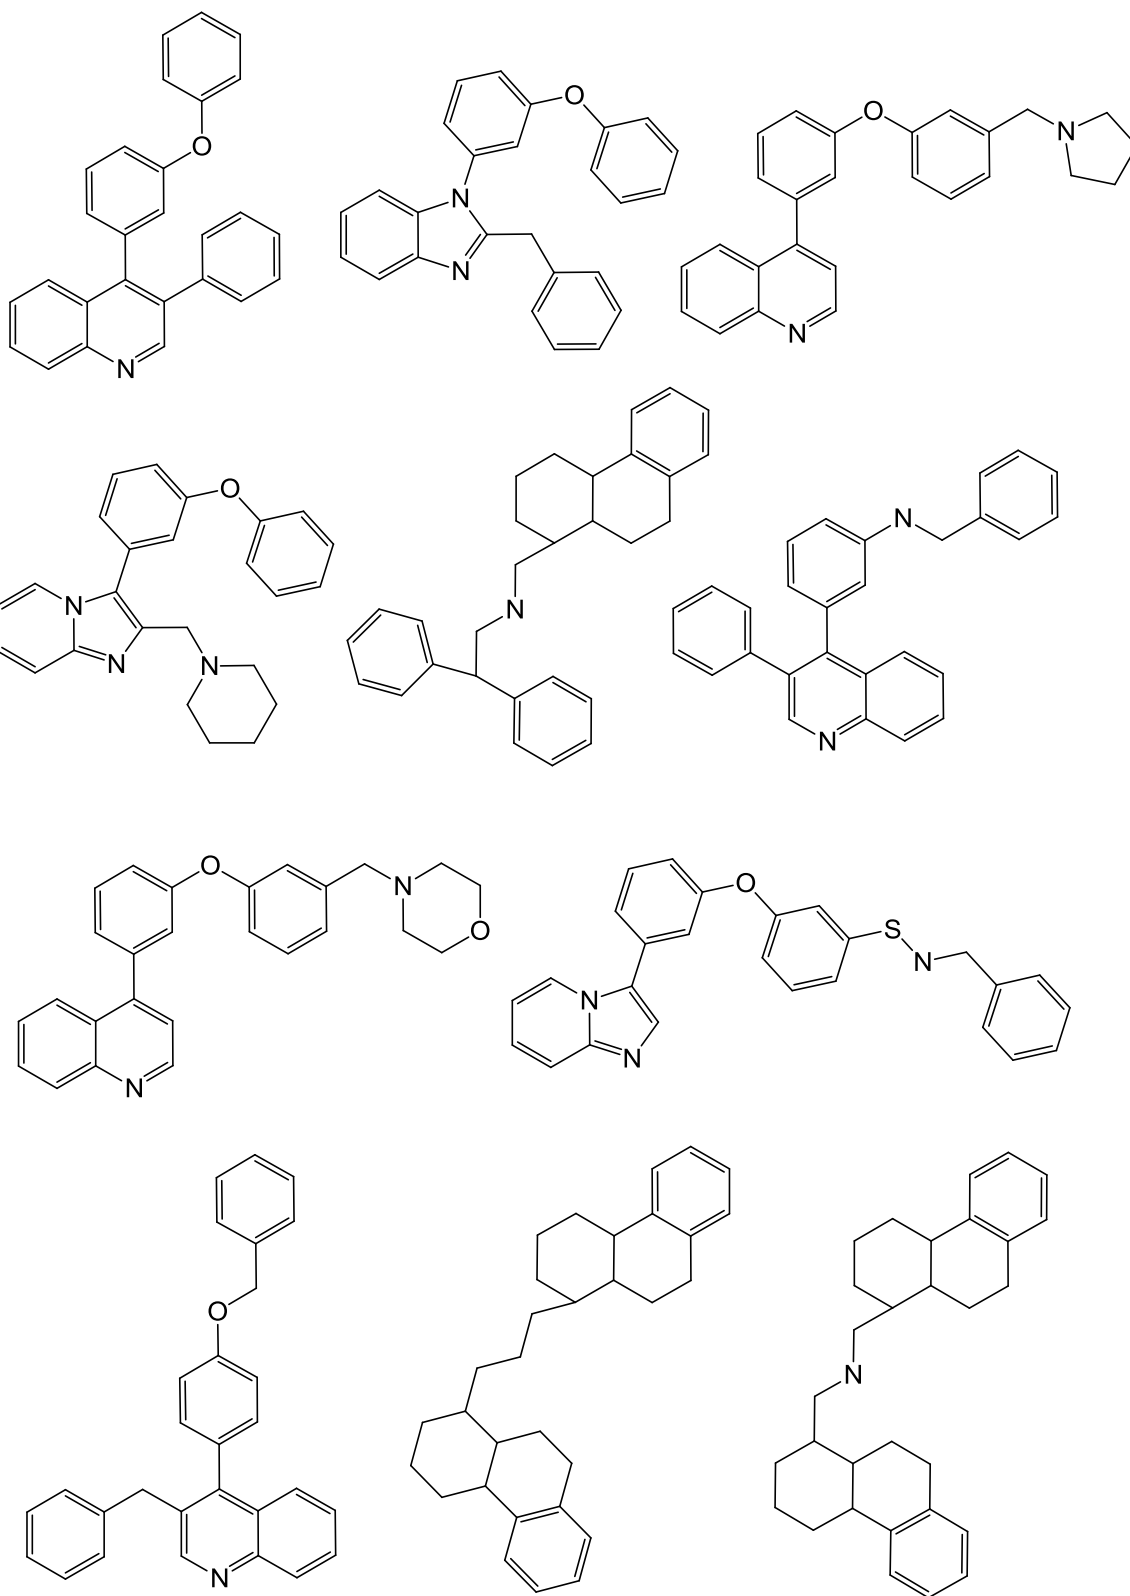

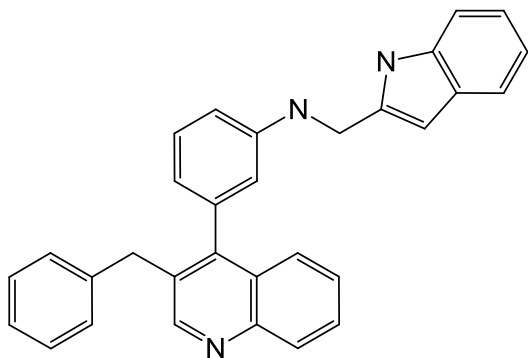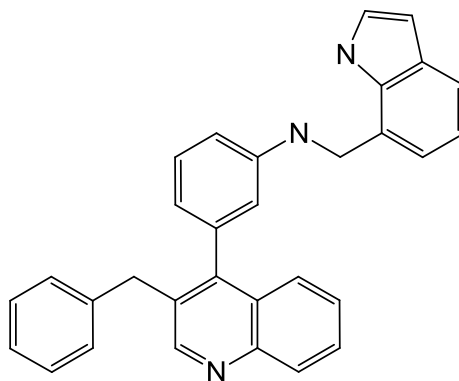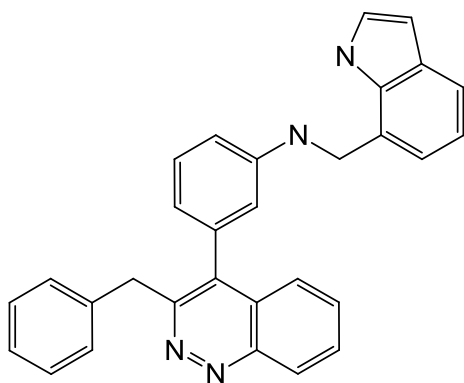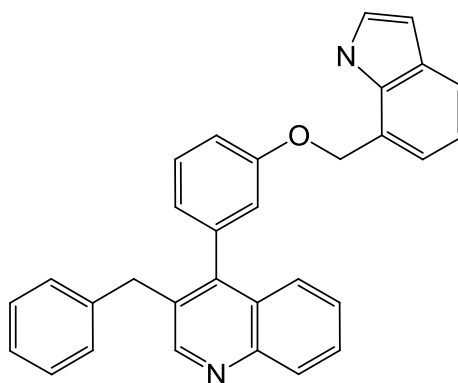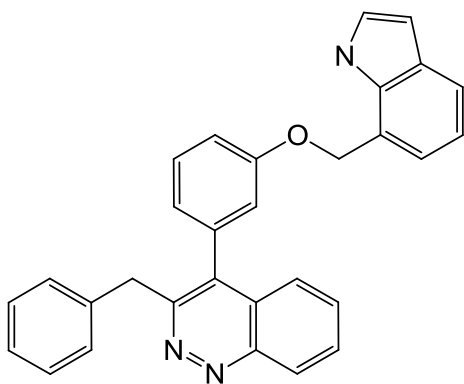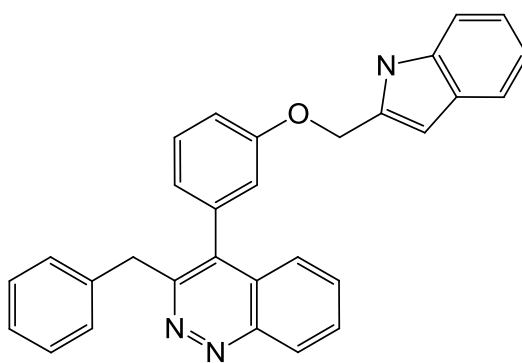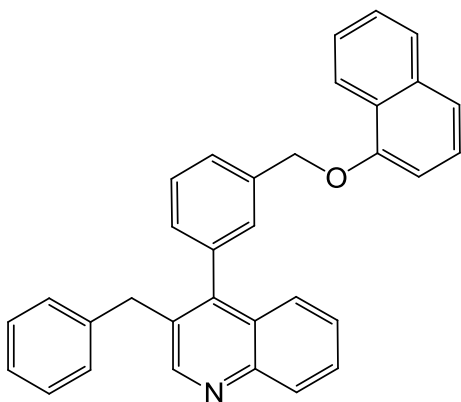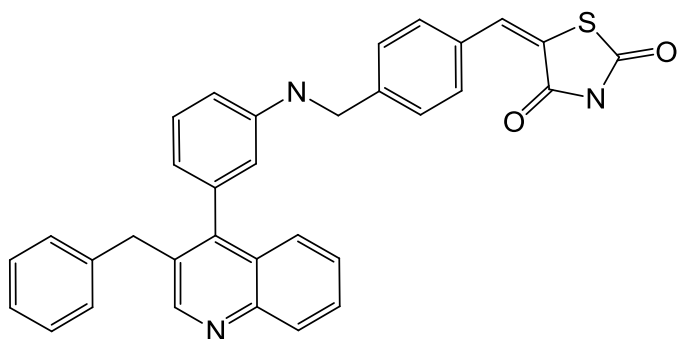

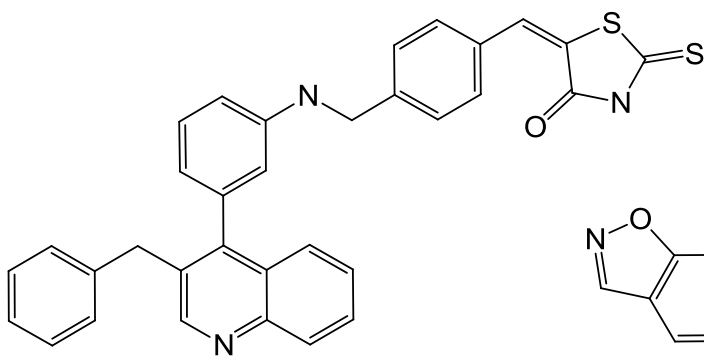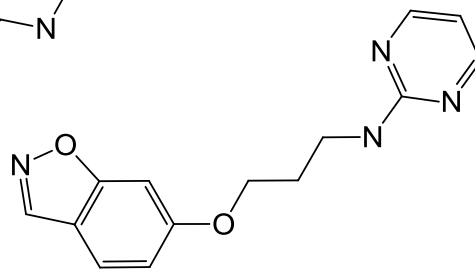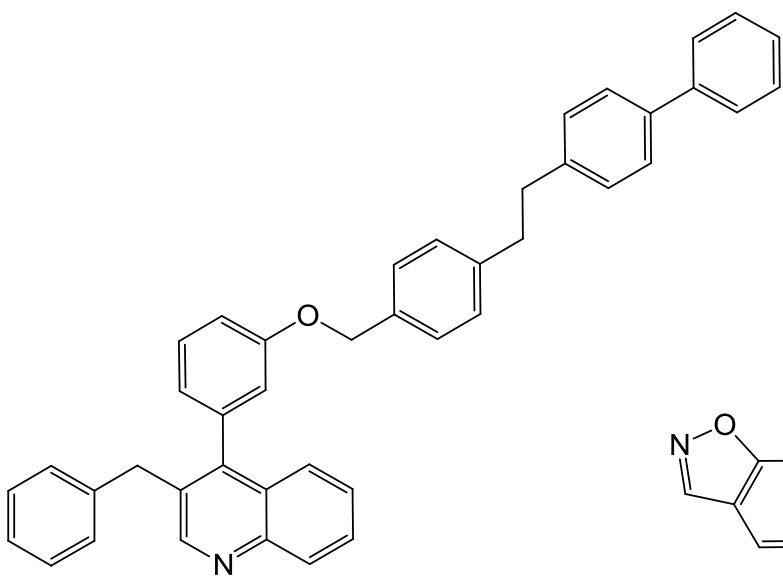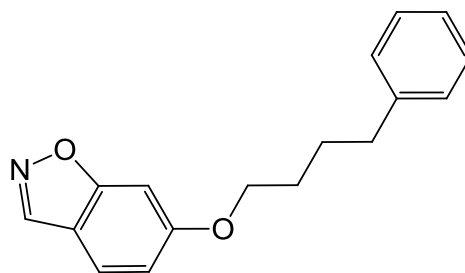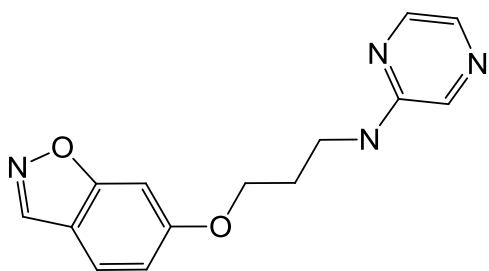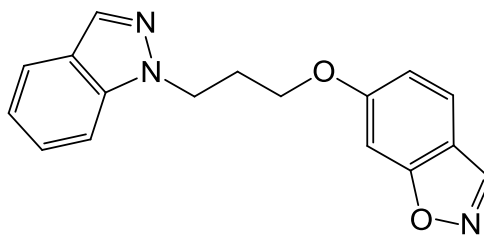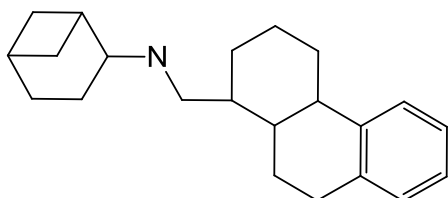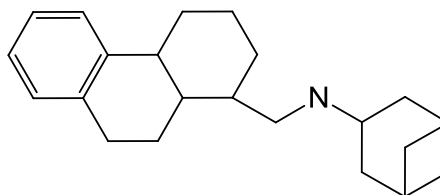

Supplement: c4mb00718b2.pdf [file c4mb00718b2.pdf]
