# Supplementary material for: Predicting selective liver X receptor β agonists using multiple machine learning methods
Source: Royal Society of Chemistry journal article supplement (doi:10.1039/c4mb00718b), 2015-02-20
Supplement: c4mb00718b3.xlsx [file c4mb00718b3.xlsx]

## Sheet: Sheet2
BCUT_PEOE_0	0.295
GCUT_SMR_0	0.274
Q_VSA_FNEG	0.262
BCUT_SLOGP_0	0.261
GCUT_SMR_2	0.259
PEOE_VSA+0	0.258
BCUT_PEOE_1	0.242
GCUT_PEOE_2	0.233
BCUT_SMR_1	0.232
BCUT_SLOGP_1	0.193
GCUT_SMR_1	0.135
logP(o/w)	0.111
correlation coefficient	BCUT_PEOE_0	BCUT_PEOE_1	BCUT_SLOGP_0	BCUT_SLOGP_1	BCUT_SMR_1	GCUT_PEOE_2	GCUT_SMR_0	GCUT_SMR_1	GCUT_SMR_2	logP(o/w)	PEOE_VSA+0	Q_VSA_FNEG
BCUT_PEOE_0	1	-0.669	0.857	0.582	0.535	0.467	0.681	-0.306	0.584	0.277	0.764	0.852
BCUT_PEOE_1	-0.669	1	-0.608	0.846	0.832	-0.674	-0.559	0.688	-0.735	-0.461	0.556	-0.649
BCUT_SLOGP_0	0.857	-0.608	1	-0.511	-0.472	0.368	0.802	-0.301	0.487	0.388	0.666	0.711
BCUT_SLOGP_1	0.582	0.846	-0.511	1	0.826	-0.639	-0.459	0.81	-0.524	-0.392	0.454	-0.486
BCUT_SMR_1	0.535	0.832	-0.472	0.826	1	-0.849	-0.489	0.841	-0.607	-0.4	0.516	-0.55
GCUT_PEOE_2	0.467	-0.674	0.368	-0.639	-0.849	1	0.417	-0.631	0.582	0.298	-0.517	0.59
GCUT_SMR_0	0.681	-0.559	0.802	-0.459	-0.489	0.417	1	-0.364	0.437	0.338	-0.551	0.59
GCUT_SMR_1	-0.306	0.688	-0.301	0.81	0.841	-0.631	-0.364	1	-0.4	-0.373	-0.27	-0.214
GCUT_SMR_2	0.584	-0.735	0.487	-0.524	-0.607	0.582	0.437	-0.4	1	0.279	-0.517	0.651
logP(o/w)	0.277	-0.461	0.388	-0.392	-0.4	0.298	0.338	-0.373	0.279	1	-0.165	0.29
PEOE_VSA+0	0.764	0.556	0.666	0.454	0.516	-0.517	-0.551	-0.27	-0.517	-0.165	1	-0.789
Q_VSA_FNEG	0.852	-0.649	0.711	-0.486	-0.55	0.59	0.59	-0.214	0.651	0.29	-0.789	1
