# Supplementary material for: Predicting selective liver X receptor β agonists using multiple machine learning methods
Source: Royal Society of Chemistry journal article supplement (doi:10.1039/c4mb00718b), 2015-02-20
Supplement: c4mb00718b4.pdf [file c4mb00718b4.pdf]

### Electronic Supplementary Information

S1: The training set, the test set, external test set and the deleted compound. The  $IC_{50}$  ( $LXR\alpha$ ),  $IC_{50}$  ( $LXR\beta$ ), SR, and classification values were given.

S2: The S-cluster results.

S3: The detailed results of Pearson correlation analysis for MOE descriptors.

S4: Table S1 Cross-validation results of 16 models derived from structural fingerprints.

Table S2 Statistics of the typical privileged fragments and unprivileged fragments.

Fig. S1 A: privileged fragments for selective  $LXR\beta$  agonists (PS1~20). B: Unprivileged fragments for selective  $LXR\beta$  agonists (NS1~20).

S5: The performance of the ensemble classifier, Adaboost, LibD3C, and random forest.

S6: The usage of LIBSVM for building SVM-PaDEL model.
