# Supplementary material for: Predicting selective liver X receptor β agonists using multiple machine learning methods
Source: Royal Society of Chemistry journal article supplement (doi:10.1039/c4mb00718b), 2015-02-20
Supplement: c4mb00718b6.pdf [file c4mb00718b6.pdf]

In the present study, three ensemble classifiers,<sup>1</sup> AdaBoost, LibD3C, and Random Forest, were applied to build the classification models and validated with a 5-fold cross validation scheme.

#### **AdaBoost** (Adaptive Boosting)

AdaBoost is an ensemble method that generates a sequence of base learners focusing on the errors of previous one into a boosted classifier with weights.<sup>2, 3</sup> The AdaBoost M1 models were built using a software package (WEKA 3.7<sup>4</sup>). The JRip was selected as the base classifier and the other parameters were set as default.

#### **LibD3C**

LibD3C is a selective ensemble classifier, where multiple candidate classifiers are trained, and a set of several classifiers that are accurate and diverse are selected to deal with the problem.<sup>5</sup> Detailed descriptions of LibD3C can be found in literature. The LibD3C package was installed via the package manager in WEKA 3.7. The parameters were set as default.

#### **Random Forest**

Random forest is a tree-based ensemble classifier. It grows many classification trees. These trees vote to generate the most popular class.<sup>2, 6</sup> The random forest models were built using a software package (Orange 2.7). The number of the trees in a forest ranged from 3 to 15. The best number of the tree is the one with the highest accuracy in the testing.

#### **The performance of the ensemble classifiers**

For the property descriptor-based models, the performance of AdaBoost models was better than LibD3C and Random forest (Table S1, Table S2, and Table S3). Adaboost models were worse than descriptor-based SVM models. LibD3C and random forest models were slightly better than KNN models.

For the structural fingerprint-based models, the ES-based LibD3C model had the best predictivity in ensemble classifiers. Overall, the fingerprint-based LibD3C models were better than AdaBoost and random forest models. Fingerprint-based LibD3C models were better than descriptor-based LibD3C models. LibD3C models were worse than fingerprint-based SVM models (except SVM\_ES model). Fingerprint-based LibD3C models were better than fingerprint-based KNN, RP, and NB models (except RP\_S and NB\_S models).

Overall, the combinatorial AdaBoost and LibD3C models were better than combinatorial random forest models. The combinatorial AdaBoost models (PaDEL\_S and PaDEL\_SC) and LibD3C models (MOE\_MA, MOE\_S, PaDEL\_MA, and PaDEL\_S) achieved the best overall predictivity (MCC values were greater than 0.85). ES Fingerprint-descriptor based AdaBoost and LibD3C models were worse than property descriptor based or fingerprint-based models. Overall, the predictivity of combined AdaBoost and LibD3C models was comparable to the combined SVM models.

**Table S1** The performance of AdaBoost models based on property descriptors and structural fingerprints

| AdaBoost Models | Training set |    |    |    |       |       |       |       | Test set |    |    |    |       |       |       |       |
|-----------------|--------------|----|----|----|-------|-------|-------|-------|----------|----|----|----|-------|-------|-------|-------|
|                 | TP           | TN | FP | FN | SE    | SP    | Q     | MCC   | TP       | TN | FP | FN | SE    | SP    | Q     | MCC   |
| MOE             | 56           | 95 | 12 | 13 | 0.812 | 0.888 | 0.858 | 0.701 | 18       | 35 | 1  | 4  | 0.818 | 0.972 | 0.914 | 0.817 |
| PaDEL           | 53           | 95 | 12 | 16 | 0.768 | 0.888 | 0.841 | 0.664 | 20       | 33 | 3  | 2  | 0.909 | 0.917 | 0.914 | 0.819 |
| ES              | 58           | 98 | 9  | 11 | 0.841 | 0.916 | 0.886 | 0.761 | 16       | 33 | 3  | 6  | 0.727 | 0.917 | 0.845 | 0.666 |
| MA              | 61           | 97 | 10 | 8  | 0.884 | 0.907 | 0.898 | 0.787 | 16       | 34 | 2  | 6  | 0.727 | 0.944 | 0.862 | 0.705 |
| S               | 60           | 95 | 12 | 9  | 0.870 | 0.888 | 0.881 | 0.752 | 18       | 34 | 2  | 4  | 0.818 | 0.944 | 0.897 | 0.779 |
| SC              | 57           | 98 | 9  | 12 | 0.826 | 0.916 | 0.881 | 0.748 | 18       | 34 | 2  | 4  | 0.818 | 0.944 | 0.897 | 0.779 |
| MOE-ES          | 57           | 94 | 13 | 12 | 0.826 | 0.879 | 0.858 | 0.703 | 19       | 33 | 3  | 3  | 0.864 | 0.917 | 0.897 | 0.780 |
| MOE-MA          | 55           | 99 | 8  | 14 | 0.797 | 0.925 | 0.875 | 0.736 | 19       | 33 | 3  | 3  | 0.864 | 0.917 | 0.897 | 0.780 |
| MOE-S           | 58           | 91 | 16 | 11 | 0.841 | 0.850 | 0.847 | 0.683 | 18       | 35 | 1  | 4  | 0.818 | 0.972 | 0.914 | 0.817 |
| MOE-SC          | 56           | 94 | 13 | 13 | 0.812 | 0.879 | 0.852 | 0.690 | 19       | 34 | 2  | 3  | 0.864 | 0.944 | 0.914 | 0.816 |
| PaDEL-ES        | 57           | 96 | 11 | 12 | 0.826 | 0.897 | 0.869 | 0.725 | 17       | 34 | 2  | 5  | 0.773 | 0.944 | 0.879 | 0.741 |
| PaDEL-MA        | 56           | 96 | 11 | 13 | 0.812 | 0.897 | 0.864 | 0.713 | 18       | 35 | 1  | 4  | 0.818 | 0.972 | 0.914 | 0.817 |
| PaDEL-S         | 57           | 96 | 11 | 12 | 0.826 | 0.897 | 0.869 | 0.725 | 19       | 35 | 1  | 3  | 0.864 | 0.972 | 0.931 | 0.853 |
| PaDEL-SC        | 56           | 97 | 10 | 13 | 0.812 | 0.907 | 0.869 | 0.724 | 21       | 34 | 2  | 1  | 0.955 | 0.944 | 0.948 | 0.892 |

**Table S2** The performance of LibD3C models based on property descriptors and structural fingerprints

| LibD3C Models | Training set |     |    |    |       |       |       |       | Test set |    |    |    |       |       |       |       |
|---------------|--------------|-----|----|----|-------|-------|-------|-------|----------|----|----|----|-------|-------|-------|-------|
|               | TP           | TN  | FP | FN | SE    | SP    | Q     | MCC   | TP       | TN | FP | FN | SE    | SP    | Q     | MCC   |
| MOE           | 52           | 99  | 8  | 17 | 0.754 | 0.925 | 0.858 | 0.699 | 17       | 32 | 4  | 5  | 0.773 | 0.889 | 0.845 | 0.668 |
| PaDEL         | 53           | 101 | 6  | 16 | 0.768 | 0.944 | 0.875 | 0.736 | 15       | 35 | 1  | 7  | 0.682 | 0.972 | 0.862 | 0.710 |

|          |    |     |    |    |       |       |       |       |    |    |   |    |       |       |       |       |
|----------|----|-----|----|----|-------|-------|-------|-------|----|----|---|----|-------|-------|-------|-------|
| ES       | 46 | 101 | 6  | 23 | 0.667 | 0.944 | 0.835 | 0.653 | 17 | 36 | 0 | 5  | 0.773 | 1.000 | 0.914 | 0.824 |
| MA       | 52 | 95  | 12 | 17 | 0.754 | 0.888 | 0.835 | 0.651 | 17 | 35 | 1 | 5  | 0.773 | 0.972 | 0.897 | 0.781 |
| S        | 50 | 99  | 8  | 19 | 0.725 | 0.925 | 0.847 | 0.675 | 15 | 35 | 1 | 7  | 0.682 | 0.972 | 0.862 | 0.710 |
| SC       | 57 | 92  | 15 | 12 | 0.826 | 0.860 | 0.847 | 0.681 | 16 | 36 | 0 | 6  | 0.727 | 1.000 | 0.897 | 0.790 |
| MOE-ES   | 54 | 95  | 12 | 15 | 0.783 | 0.888 | 0.847 | 0.676 | 9  | 36 | 0 | 13 | 0.409 | 1.000 | 0.776 | 0.548 |
| MOE-MA   | 49 | 99  | 8  | 20 | 0.710 | 0.925 | 0.841 | 0.663 | 19 | 35 | 1 | 3  | 0.864 | 0.972 | 0.931 | 0.853 |
| MOE-S    | 48 | 95  | 12 | 21 | 0.696 | 0.888 | 0.813 | 0.601 | 18 | 36 | 0 | 4  | 0.818 | 1.000 | 0.931 | 0.858 |
| MOE-SC   | 58 | 93  | 14 | 11 | 0.841 | 0.869 | 0.858 | 0.705 | 19 | 34 | 2 | 3  | 0.864 | 0.944 | 0.914 | 0.816 |
| PaDEL-ES | 63 | 96  | 11 | 6  | 0.913 | 0.897 | 0.903 | 0.801 | 11 | 35 | 1 | 11 | 0.500 | 0.972 | 0.793 | 0.566 |
| PaDEL-MA | 59 | 95  | 12 | 10 | 0.855 | 0.888 | 0.875 | 0.739 | 19 | 35 | 1 | 3  | 0.864 | 0.972 | 0.931 | 0.853 |
| PaDEL-S  | 53 | 98  | 9  | 16 | 0.768 | 0.916 | 0.858 | 0.699 | 19 | 36 | 0 | 3  | 0.864 | 1.000 | 0.948 | 0.893 |
| PaDEL-SC | 55 | 94  | 13 | 14 | 0.797 | 0.879 | 0.847 | 0.677 | 18 | 34 | 2 | 4  | 0.818 | 0.944 | 0.897 | 0.779 |

**Table S3** The performance of Random forest models based on property descriptors and structural fingerprints

| RF Models | Training set |    |    |    |       |       |       |       | Test set |    |    |    |       |       |       |       |
|-----------|--------------|----|----|----|-------|-------|-------|-------|----------|----|----|----|-------|-------|-------|-------|
|           | TP           | TN | FP | FN | SE    | SP    | Q     | MCC   | TP       | TN | FP | FN | SE    | SP    | Q     | MCC   |
| MOE       | 56           | 91 | 16 | 13 | 0.812 | 0.851 | 0.835 | 0.657 | 19       | 32 | 4  | 3  | 0.864 | 0.889 | 0.879 | 0.746 |
| PaDEL     | 57           | 96 | 11 | 12 | 0.826 | 0.897 | 0.869 | 0.725 | 18       | 31 | 5  | 4  | 0.818 | 0.861 | 0.845 | 0.674 |
| ES        | 59           | 88 | 19 | 10 | 0.855 | 0.822 | 0.835 | 0.666 | 19       | 32 | 4  | 3  | 0.864 | 0.889 | 0.879 | 0.746 |
| MA        | 57           | 97 | 10 | 12 | 0.826 | 0.907 | 0.875 | 0.737 | 18       | 32 | 4  | 4  | 0.818 | 0.889 | 0.862 | 0.707 |
| S         | 60           | 95 | 12 | 9  | 0.870 | 0.888 | 0.881 | 0.752 | 13       | 32 | 4  | 9  | 0.591 | 0.889 | 0.776 | 0.512 |
| SC        | 59           | 95 | 12 | 10 | 0.855 | 0.888 | 0.875 | 0.739 | 17       | 33 | 3  | 5  | 0.773 | 0.917 | 0.862 | 0.704 |
| MOE-ES    | 59           | 97 | 10 | 10 | 0.855 | 0.907 | 0.886 | 0.762 | 18       | 30 | 6  | 4  | 0.818 | 0.833 | 0.828 | 0.642 |
| MOE-MA    | 59           | 96 | 11 | 10 | 0.855 | 0.897 | 0.881 | 0.750 | 18       | 32 | 4  | 4  | 0.818 | 0.889 | 0.862 | 0.707 |
| MOE-S     | 58           | 93 | 14 | 11 | 0.841 | 0.869 | 0.858 | 0.705 | 18       | 34 | 2  | 4  | 0.818 | 0.944 | 0.897 | 0.779 |
| MOE-SC    | 59           | 95 | 12 | 10 | 0.855 | 0.888 | 0.875 | 0.739 | 18       | 33 | 3  | 4  | 0.818 | 0.917 | 0.879 | 0.742 |
| PaDEL-ES  | 62           | 91 | 16 | 7  | 0.899 | 0.851 | 0.869 | 0.736 | 19       | 31 | 5  | 3  | 0.864 | 0.861 | 0.862 | 0.714 |
| PaDEL-MA  | 58           | 97 | 10 | 11 | 0.841 | 0.907 | 0.881 | 0.749 | 19       | 31 | 5  | 3  | 0.864 | 0.861 | 0.862 | 0.714 |
| PaDEL -S  | 65           | 94 | 13 | 4  | 0.942 | 0.879 | 0.903 | 0.806 | 18       | 31 | 5  | 4  | 0.818 | 0.861 | 0.845 | 0.674 |

|                   |    |    |    |   |       |       |       |       |    |    |   |   |       |       |       |       |
|-------------------|----|----|----|---|-------|-------|-------|-------|----|----|---|---|-------|-------|-------|-------|
| PaDEL -SC         | 64 | 95 | 12 | 5 | 0.928 | 0.888 | 0.903 | 0.804 | 18 | 32 | 4 | 4 | 0.818 | 0.889 | 0.862 | 0.707 |
| RF: Random forest |    |    |    |   |       |       |       |       |    |    |   |   |       |       |       |       |

### Validated the top ensemble classifiers with the external test

Top-13 models (with MCC values exceeding 0.8 for test set) were tested using external test data. 7 out of the 13 models had overall predictive accuracies (Q) exceeding 90%. These models exhibited predictive performance exceeding 80% for the training, test, and the external test sets.

**Table S4** Top 13 models (with MCC values exceeding 0.8 for test set) validated with external test data, test data, and training data.

| Classifier | Descriptors | External test set |       | Test set | Training set |
|------------|-------------|-------------------|-------|----------|--------------|
|            |             | NCP*              | Q1    | Q2       | Q3           |
| LibD3C     | ES          | 45                | 59.21 | 91.38    | 83.52        |
|            | MOE_MA      | 73                | 96.05 | 93.10    | 84.09        |
|            | MOE_S       | 69                | 90.79 | 93.10    | 81.25        |
|            | MOE_SC      | 71                | 93.42 | 91.38    | 85.80        |
|            | PaDEL_MA    | 74                | 97.37 | 93.10    | 87.50        |
|            | PaDEL_S     | 55                | 72.37 | 94.83    | 85.80        |
| AdaBoost   | MOE         | 65                | 85.53 | 91.38    | 85.80        |
|            | PaDEL       | 68                | 89.47 | 91.38    | 84.09        |
|            | MOE_S       | 66                | 86.84 | 91.38    | 84.66        |
|            | MOE_SC      | 72                | 94.74 | 91.38    | 85.23        |
|            | PaDEL_MA    | 74                | 97.37 | 91.38    | 86.36        |
|            | PaDEL_S     | 68                | 89.47 | 93.10    | 86.93        |
|            | PaDEL_SC    | 72                | 94.74 | 94.83    | 86.93        |

\* NCP: Number of correct predictions; Q1~3: overall predictive accuracies.

### References

- 1 P. Y. Yang, Y. Zhou, B. Zomaya, A. Y., *Current Bioinformatics*, 2010, 5, 296-308.
- 2 J. C.-W. Chan and D. Paelinckx, *Remote Sens. Environ.*, 2008, 112, 2999-3011.
- 3 Y. S. Freund, R. E., *Jouranal of Japanese Society for Artificial Intelligence*, 1999, 14, 771-780.
- 4 M. F. Hall, E. Holmes, G. Pfahringer, B. Reutemann P. Witten, L. H., *SigKdd Explorations*, 11, 10-18.

- 5 C. Lin, W. Chen, C. Qiu, Y. Wu, S. Krishnan and Q. Zou, *Neurocomputing*, 2014, 123, 424-435.
- 6 L. Breiman, *Machine learning*, 2001, 45, 5-32.
