# Supplementary material for: Predicting selective liver X receptor β agonists using multiple machine learning methods
Source: Royal Society of Chemistry journal article supplement (doi:10.1039/c4mb00718b), 2015-02-20
Supplement: c4mb00718b9.sdf [file c4mb00718b9.sdf]

FC(F)(F)c1c2ncc(Cc3ccccc3)c(c2ccc1)-c1cc(NCc2c3n(ccc3ccc2)C)ccc1
  MOE2013           2D

 39 44  0  0  0  0  0  0  0  0999 V2000
    0.0000    0.0000    0.0000 F   0  0  0  0  0  0  0  0  0  0  0  0
    1.5000   -0.0027    0.0000 C   0  0  0  0  0  0  0  0  0  0  0  0
    1.5027    1.4973    0.0000 F   0  0  0  0  0  0  0  0  0  0  0  0
    1.4973   -1.5027    0.0000 F   0  0  0  0  0  0  0  0  0  0  0  0
    3.0000   -0.0055    0.0000 C   0  0  0  0  0  0  0  0  0  0  0  0
    3.7476   -1.3059    0.0000 C   0  0  0  0  0  0  0  0  0  0  0  0
    2.9953   -2.6035    0.0000 N   0  0  0  0  0  0  0  0  0  0  0  0
    3.7429   -3.9039    0.0000 C   0  0  0  0  0  0  0  0  0  0  0  0
    5.2429   -3.9067    0.0000 C   0  0  0  0  0  0  0  0  0  0  0  0
    5.9905   -5.2071    0.0000 C   0  0  0  0  0  0  0  0  0  0  0  0
    5.2381   -6.5048    0.0000 C   0  0  0  0  0  0  0  0  0  0  0  0
    3.7381   -6.5020    0.0000 C   0  0  0  0  0  0  0  0  0  0  0  0
    2.9858   -7.7997    0.0000 C   0  0  0  0  0  0  0  0  0  0  0  0
    3.7334   -9.1001    0.0000 C   0  0  0  0  0  0  0  0  0  0  0  0
    5.2334   -9.1028    0.0000 C   0  0  0  0  0  0  0  0  0  0  0  0
    5.9858   -7.8052    0.0000 C   0  0  0  0  0  0  0  0  0  0  0  0
    5.9953   -2.6090    0.0000 C   0  0  0  0  0  0  0  0  0  0  0  0
    5.2476   -1.3086    0.0000 C   0  0  0  0  0  0  0  0  0  0  0  0
    6.0000   -0.0109    0.0000 C   0  0  0  0  0  0  0  0  0  0  0  0
    5.2524    1.2895    0.0000 C   0  0  0  0  0  0  0  0  0  0  0  0
    3.7524    1.2922    0.0000 C   0  0  0  0  0  0  0  0  0  0  0  0
    7.4952   -2.6117    0.0000 C   0  0  0  0  0  0  0  0  0  0  0  0
    8.2476   -1.3141    0.0000 C   0  0  0  0  0  0  0  0  0  0  0  0
    9.7476   -1.3168    0.0000 C   0  0  0  0  0  0  0  0  0  0  0  0
   10.5000   -0.0191    0.0000 N   0  0  0  0  0  0  0  0  0  0  0  0
   12.0000   -0.0219    0.0000 C   0  0  0  0  0  0  0  0  0  0  0  0
   12.7523    1.2758    0.0000 C   0  0  0  0  0  0  0  0  0  0  0  0
   14.2523    1.2730    0.0000 C   0  0  0  0  0  0  0  0  0  0  0  0
   15.2540    0.1565    0.0000 N   0  0  0  0  0  0  0  0  0  0  0  0
   16.6254    0.7641    0.0000 C   0  0  0  0  0  0  0  0  0  0  0  0
   16.4714    2.2562    0.0000 C   0  0  0  0  0  0  0  0  0  0  0  0
   15.0047    2.5707    0.0000 C   0  0  0  0  0  0  0  0  0  0  0  0
   14.2571    3.8711    0.0000 C   0  0  0  0  0  0  0  0  0  0  0  0
   12.7571    3.8739    0.0000 C   0  0  0  0  0  0  0  0  0  0  0  0
   12.0047    2.5762    0.0000 C   0  0  0  0  0  0  0  0  0  0  0  0
   14.9395   -1.3101    0.0000 C   0  0  0  0  0  0  0  0  0  0  0  0
   10.4952   -2.6172    0.0000 C   0  0  0  0  0  0  0  0  0  0  0  0
    9.7429   -3.9149    0.0000 C   0  0  0  0  0  0  0  0  0  0  0  0
    8.2429   -3.9122    0.0000 C   0  0  0  0  0  0  0  0  0  0  0  0
  1  2  1  0  0  0  0
  2  3  1  0  0  0  0
  2  4  1  0  0  0  0
  2  5  1  0  0  0  0
  5  6  1  0  0  0  0
  5 21  2  3  0  0  0
  6  7  1  0  0  0  0
  6 18  2  3  0  0  0
  7  8  2  3  0  0  0
  8  9  1  0  0  0  0
  9 10  1  0  0  0  0
  9 17  2  3  0  0  0
 10 11  1  0  0  0  0
 11 12  1  0  0  0  0
 11 16  2  3  0  0  0
 12 13  2  3  0  0  0
 13 14  1  0  0  0  0
 14 15  2  3  0  0  0
 15 16  1  0  0  0  0
 17 18  1  0  0  0  0
 17 22  1  0  0  0  0
 18 19  1  0  0  0  0
 19 20  2  3  0  0  0
 20 21  1  0  0  0  0
 22 23  1  0  0  0  0
 22 39  2  3  0  0  0
 23 24  2  3  0  0  0
 24 25  1  0  0  0  0
 24 37  1  0  0  0  0
 25 26  1  0  0  0  0
 26 27  1  0  0  0  0
 27 28  1  0  0  0  0
 27 35  2  3  0  0  0
 28 29  1  0  0  0  0
 28 32  2  3  0  0  0
 29 30  1  0  0  0  0
 29 36  1  0  0  0  0
 30 31  2  3  0  0  0
 31 32  1  0  0  0  0
 32 33  1  0  0  0  0
 33 34  2  3  0  0  0
 34 35  1  0  0  0  0
 37 38  2  3  0  0  0
 38 39  1  0  0  0  0
M  END
>  <VC-4>
0.013498731

>  <VC-6>
0.0038967479

>  <SPC-4>
6.4462476

>  <SwHBa>
41.7453

>  <SHCsats>
0

>  <SHother>
9.2636614

>  <SssCH2>
1.1739444

>  <ETA_Shape_Y>
0.31794

>  <ETA_dBetaP>
-0.051279999

>  <nAtomP>
17

>  <MDEC-24>
2.7619689

>  <MDEC-33>
13.804522

>  <MDEC-34>
2.246419

>  <MLFER_A>
0.197

>  <Classification>
1

$$$$
O=C([O-])[C@]1([C@H]2CC[C@@H]3C(=CC[C@@](C3)(C=C)C)[C@@]2(CCC1)C)C
  MOE2013           2D

 22 24  0  0  1  0  0  0  0  0999 V2000
   -0.0000    0.0000    0.0000 O   0  0  0  0  0  0  0  0  0  0  0  0
   -1.2993   -0.7495    0.0000 C   0  0  0  0  0  0  0  0  0  0  0  0
   -1.2998   -2.2495    0.0000 O   0  5  0  0  0  0  0  0  0  0  0  0
   -2.5981    0.0009    0.0000 C   0  0  1  0  0  0  0  0  0  0  0  0
   -4.0981    0.0014    0.0000 C   0  0  1  0  0  0  0  0  0  0  0  0
   -4.8485   -1.2973    0.0000 C   0  0  0  0  0  0  0  0  0  0  0  0
   -6.3485   -1.2968    0.0000 C   0  0  0  0  0  0  0  0  0  0  0  0
   -7.0981    0.0025    0.0000 C   0  0  2  0  0  0  0  0  0  0  0  0
   -6.3476    1.3013    0.0000 C   0  0  0  0  0  0  0  0  0  0  0  0
   -7.0972    2.6006    0.0000 C   0  0  0  0  0  0  0  0  0  0  0  0
   -8.5972    2.6011    0.0000 C   0  0  0  0  0  0  0  0  0  0  0  0
   -9.3476    1.3023    0.0000 C   0  0  1  0  0  0  0  0  0  0  0  0
   -8.5981    0.0030    0.0000 C   0  0  0  0  0  0  0  0  0  0  0  0
  -10.6464    2.0528    0.0000 C   0  0  0  0  0  0  0  0  0  0  0  0
  -10.6459    3.5528    0.0000 C   0  0  0  0  0  0  0  0  0  0  0  0
  -10.6469    0.5528    0.0000 C   0  0  0  0  0  0  0  0  0  0  0  0
   -4.8476    1.3007    0.0000 C   0  0  2  0  0  0  0  0  0  0  0  0
   -4.0972    2.5995    0.0000 C   0  0  0  0  0  0  0  0  0  0  0  0
   -2.5972    2.5990    0.0000 C   0  0  0  0  0  0  0  0  0  0  0  0
   -1.8476    1.2997    0.0000 C   0  0  0  0  0  0  0  0  0  0  0  0
   -5.5972    2.6000    0.0000 C   0  0  0  0  0  0  0  0  0  0  0  0
   -2.5986   -1.4991    0.0000 C   0  0  0  0  0  0  0  0  0  0  0  0
  1  2  2  0  0  0  0
  2  3  1  0  0  0  0
  4  2  1  1  0  0  0
  4  5  1  0  0  0  0
  4 20  1  0  0  0  0
  4 22  1  6  0  0  0
  5  6  1  1  0  0  0
  5 17  1  0  0  0  0
  6  7  1  0  0  0  0
  8  7  1  1  0  0  0
  8  9  1  0  0  0  0
  8 13  1  0  0  0  0
  9 10  2  3  0  0  0
  9 17  1  0  0  0  0
 10 11  1  0  0  0  0
 11 12  1  0  0  0  0
 12 13  1  0  0  0  0
 12 14  1  1  0  0  0
 12 16  1  6  0  0  0
 14 15  2  0  0  0  0
 17 18  1  0  0  0  0
 17 21  1  1  0  0  0
 18 19  1  0  0  0  0
 19 20  1  0  0  0  0
M  CHG  1   3  -1
M  END
>  <VC-4>
0.34846172

>  <VC-6>
0.10618947

>  <SPC-4>
7.1942363

>  <SwHBa>
9.2815733

>  <SHCsats>
4.3343949

>  <SHother>
0.80454147

>  <SssCH2>
7.2775865

>  <ETA_Shape_Y>
0.1875

>  <ETA_dBetaP>
-0.40909001

>  <nAtomP>
2

>  <MDEC-24>
10.027708

>  <MDEC-33>
2.406852

>  <MDEC-34>
5.3812761

>  <MLFER_A>
0.24600001

>  <Classification>
0

$$$$
FC(F)(F)C(O)(C(F)(F)F)c1ccc(N(Cc2cc(OC(F)(F)F)ccc2O)CCCC)cc1
  MOE2013           2D

 34 35  0  0  1  0  0  0  0  0999 V2000
    0.0000    0.0000    0.0000 F   0  0  0  0  0  0  0  0  0  0  0  0
    0.7526   -1.2976    0.0000 C   0  0  0  0  0  0  0  0  0  0  0  0
   -0.5450   -2.0501    0.0000 F   0  0  0  0  0  0  0  0  0  0  0  0
    2.0501   -0.5450    0.0000 F   0  0  0  0  0  0  0  0  0  0  0  0
    1.5051   -2.5951    0.0000 C   0  0  0  0  0  0  0  0  0  0  0  0
    0.2076   -3.3477    0.0000 O   0  0  0  0  0  0  0  0  0  0  0  0
    2.2577   -3.8927    0.0000 C   0  0  0  0  0  0  0  0  0  0  0  0
    3.0102   -5.1902    0.0000 F   0  0  0  0  0  0  0  0  0  0  0  0
    3.5552   -3.1401    0.0000 F   0  0  0  0  0  0  0  0  0  0  0  0
    0.9601   -4.6452    0.0000 F   0  0  0  0  0  0  0  0  0  0  0  0
    2.8027   -1.8426    0.0000 C   0  0  0  0  0  0  0  0  0  0  0  0
    4.1032   -2.5900    0.0000 C   0  0  0  0  0  0  0  0  0  0  0  0
    5.4007   -1.8374    0.0000 C   0  0  0  0  0  0  0  0  0  0  0  0
    5.3978   -0.3374    0.0000 C   0  0  0  0  0  0  0  0  0  0  0  0
    6.6953    0.4151    0.0000 N   0  0  3  0  0  0  0  0  0  0  0  0
    6.6924    1.9151    0.0000 C   0  0  0  0  0  0  0  0  0  0  0  0
    7.9899    2.6677    0.0000 C   0  0  0  0  0  0  0  0  0  0  0  0
    9.2905    1.9202    0.0000 C   0  0  0  0  0  0  0  0  0  0  0  0
   10.5880    2.6728    0.0000 C   0  0  0  0  0  0  0  0  0  0  0  0
   11.8885    1.9254    0.0000 O   0  0  0  0  0  0  0  0  0  0  0  0
   13.1861    2.6779    0.0000 C   0  0  0  0  0  0  0  0  0  0  0  0
   14.4837    3.4305    0.0000 F   0  0  0  0  0  0  0  0  0  0  0  0
   13.9387    1.3804    0.0000 F   0  0  0  0  0  0  0  0  0  0  0  0
   12.4335    3.9755    0.0000 F   0  0  0  0  0  0  0  0  0  0  0  0
   10.5851    4.1728    0.0000 C   0  0  0  0  0  0  0  0  0  0  0  0
    9.2846    4.9202    0.0000 C   0  0  0  0  0  0  0  0  0  0  0  0
    7.9870    4.1677    0.0000 C   0  0  0  0  0  0  0  0  0  0  0  0
    6.6865    4.9151    0.0000 O   0  0  0  0  0  0  0  0  0  0  0  0
    7.9959   -0.3323    0.0000 C   0  0  0  0  0  0  0  0  0  0  0  0
    7.9988   -1.8323    0.0000 C   0  0  0  0  0  0  0  0  0  0  0  0
    9.2993   -2.5798    0.0000 C   0  0  0  0  0  0  0  0  0  0  0  0
    9.3023   -4.0798    0.0000 C   0  0  0  0  0  0  0  0  0  0  0  0
    4.0973    0.4100    0.0000 C   0  0  0  0  0  0  0  0  0  0  0  0
    2.7997   -0.3426    0.0000 C   0  0  0  0  0  0  0  0  0  0  0  0
  1  2  1  0  0  0  0
  2  3  1  0  0  0  0
  2  4  1  0  0  0  0
  2  5  1  0  0  0  0
  5  6  1  0  0  0  0
  5  7  1  0  0  0  0
  5 11  1  0  0  0  0
  7  8  1  0  0  0  0
  7  9  1  0  0  0  0
  7 10  1  0  0  0  0
 11 12  1  0  0  0  0
 11 34  2  3  0  0  0
 12 13  2  3  0  0  0
 13 14  1  0  0  0  0
 14 15  1  0  0  0  0
 14 33  2  3  0  0  0
 15 16  1  0  0  0  0
 15 29  1  0  0  0  0
 16 17  1  0  0  0  0
 17 18  1  0  0  0  0
 17 27  2  3  0  0  0
 18 19  2  3  0  0  0
 19 20  1  0  0  0  0
 19 25  1  0  0  0  0
 20 21  1  0  0  0  0
 21 22  1  0  0  0  0
 21 23  1  0  0  0  0
 21 24  1  0  0  0  0
 25 26  2  3  0  0  0
 26 27  1  0  0  0  0
 27 28  1  0  0  0  0
 29 30  1  0  0  0  0
 30 31  1  0  0  0  0
 31 32  1  0  0  0  0
 33 34  1  0  0  0  0
M  END
>  <VC-4>
0.065969981

>  <VC-6>
0.05209782

>  <SPC-4>
9.0429468

>  <SwHBa>
3.1701987

>  <SHCsats>
2.0684478

>  <SHother>
5.0914516

>  <SssCH2>
1.1264703

>  <ETA_Shape_Y>
0.20039999

>  <ETA_dBetaP>
-0.36765

>  <nAtomP>
8

>  <MDEC-24>
7.506155

>  <MDEC-33>
2.779865

>  <MDEC-34>
3.7819374

>  <MLFER_A>
1.397

>  <Classification>
0

$$$$
Clc1c2ncc(Cc3ccccc3)c(c2ccc1)-c1cc(Oc2cc(S(=O)(=O)C)ccc2)ccc1
  MOE2013           2D

 35 39  0  0  0  0  0  0  0  0999 V2000
    0.0000   -0.0000    0.0000 Cl  0  0  0  0  0  0  0  0  0  0  0  0
    0.7578   -1.2945    0.0000 C   0  0  0  0  0  0  0  0  0  0  0  0
    0.0157   -2.5980    0.0000 C   0  0  0  0  0  0  0  0  0  0  0  0
   -1.4843   -2.6071    0.0000 N   0  0  0  0  0  0  0  0  0  0  0  0
   -2.2264   -3.9107    0.0000 C   0  0  0  0  0  0  0  0  0  0  0  0
   -1.4685   -5.2051    0.0000 C   0  0  0  0  0  0  0  0  0  0  0  0
   -2.2107   -6.5087    0.0000 C   0  0  0  0  0  0  0  0  0  0  0  0
   -3.7106   -6.5178    0.0000 C   0  0  0  0  0  0  0  0  0  0  0  0
   -4.4685   -5.2233    0.0000 C   0  0  0  0  0  0  0  0  0  0  0  0
   -5.9684   -5.2324    0.0000 C   0  0  0  0  0  0  0  0  0  0  0  0
   -6.7106   -6.5359    0.0000 C   0  0  0  0  0  0  0  0  0  0  0  0
   -5.9527   -7.8304    0.0000 C   0  0  0  0  0  0  0  0  0  0  0  0
   -4.4528   -7.8213    0.0000 C   0  0  0  0  0  0  0  0  0  0  0  0
    0.0314   -5.1961    0.0000 C   0  0  0  0  0  0  0  0  0  0  0  0
    0.7736   -3.8925    0.0000 C   0  0  0  0  0  0  0  0  0  0  0  0
    2.2735   -3.8834    0.0000 C   0  0  0  0  0  0  0  0  0  0  0  0
    3.0157   -2.5799    0.0000 C   0  0  0  0  0  0  0  0  0  0  0  0
    2.2578   -1.2854    0.0000 C   0  0  0  0  0  0  0  0  0  0  0  0
    0.7893   -6.4905    0.0000 C   0  0  0  0  0  0  0  0  0  0  0  0
    2.2893   -6.4815    0.0000 C   0  0  0  0  0  0  0  0  0  0  0  0
    3.0471   -7.7759    0.0000 C   0  0  0  0  0  0  0  0  0  0  0  0
    4.5471   -7.7669    0.0000 O   0  0  0  0  0  0  0  0  0  0  0  0
    5.3049   -9.0613    0.0000 C   0  0  0  0  0  0  0  0  0  0  0  0
    6.8049   -9.0523    0.0000 C   0  0  0  0  0  0  0  0  0  0  0  0
    7.5627  -10.3467    0.0000 C   0  0  0  0  0  0  0  0  0  0  0  0
    9.0627  -10.3377    0.0000 S   0  0  0  0  0  0  0  0  0  0  0  0
    9.0536   -8.8377    0.0000 O   0  0  0  0  0  0  0  0  0  0  0  0
    9.0718  -11.8376    0.0000 O   0  0  0  0  0  0  0  0  0  0  0  0
   10.5627  -10.3286    0.0000 C   0  0  0  0  0  0  0  0  0  0  0  0
    6.8206  -11.6503    0.0000 C   0  0  0  0  0  0  0  0  0  0  0  0
    5.3207  -11.6594    0.0000 C   0  0  0  0  0  0  0  0  0  0  0  0
    4.5628  -10.3649    0.0000 C   0  0  0  0  0  0  0  0  0  0  0  0
    2.3050   -9.0795    0.0000 C   0  0  0  0  0  0  0  0  0  0  0  0
    0.8050   -9.0886    0.0000 C   0  0  0  0  0  0  0  0  0  0  0  0
    0.0472   -7.7941    0.0000 C   0  0  0  0  0  0  0  0  0  0  0  0
  1  2  1  0  0  0  0
  2  3  1  0  0  0  0
  2 18  2  3  0  0  0
  3  4  1  0  0  0  0
  3 15  2  3  0  0  0
  4  5  2  3  0  0  0
  5  6  1  0  0  0  0
  6  7  1  0  0  0  0
  6 14  2  3  0  0  0
  7  8  1  0  0  0  0
  8  9  1  0  0  0  0
  8 13  2  3  0  0  0
  9 10  2  3  0  0  0
 10 11  1  0  0  0  0
 11 12  2  3  0  0  0
 12 13  1  0  0  0  0
 14 15  1  0  0  0  0
 14 19  1  0  0  0  0
 15 16  1  0  0  0  0
 16 17  2  3  0  0  0
 17 18  1  0  0  0  0
 19 20  1  0  0  0  0
 19 35  2  3  0  0  0
 20 21  2  3  0  0  0
 21 22  1  0  0  0  0
 21 33  1  0  0  0  0
 22 23  1  0  0  0  0
 23 24  1  0  0  0  0
 23 32  2  3  0  0  0
 24 25  2  3  0  0  0
 25 26  1  0  0  0  0
 25 30  1  0  0  0  0
 26 27  2  0  0  0  0
 26 28  2  0  0  0  0
 26 29  1  0  0  0  0
 30 31  2  3  0  0  0
 31 32  1  0  0  0  0
 33 34  2  3  0  0  0
 34 35  1  0  0  0  0
M  END
>  <VC-4>
0.050999172

>  <VC-6>
0.016999723

>  <SPC-4>
5.6806922

>  <SwHBa>
43.226986

>  <SHCsats>
0

>  <SHother>
8.4909

>  <SssCH2>
0.77672791

>  <ETA_Shape_Y>
0.28657001

>  <ETA_dBetaP>
0.05714

>  <nAtomP>
26

>  <MDEC-24>
0

>  <MDEC-33>
12.563893

>  <MDEC-34>
0

>  <MLFER_A>
0.003

>  <Classification>
0

$$$$
Clc1c2ncc(C)c(c2ccc1)-c1cc(Oc2cc(ccc2)C(O)(C)C)ccc1
  MOE2013           2D

 29 32  0  0  0  0  0  0  0  0999 V2000
   -0.0000   -0.0000    0.0000 Cl  0  0  0  0  0  0  0  0  0  0  0  0
   -1.2983   -0.7512    0.0000 C   0  0  0  0  0  0  0  0  0  0  0  0
   -2.5981   -0.0025    0.0000 C   0  0  0  0  0  0  0  0  0  0  0  0
   -2.5995    1.4975    0.0000 N   0  0  0  0  0  0  0  0  0  0  0  0
   -3.8992    2.2463    0.0000 C   0  0  0  0  0  0  0  0  0  0  0  0
   -5.1976    1.4951    0.0000 C   0  0  0  0  0  0  0  0  0  0  0  0
   -6.4973    2.2438    0.0000 C   0  0  0  0  0  0  0  0  0  0  0  0
   -5.1962   -0.0049    0.0000 C   0  0  0  0  0  0  0  0  0  0  0  0
   -3.8964   -0.7537    0.0000 C   0  0  0  0  0  0  0  0  0  0  0  0
   -3.8950   -2.2537    0.0000 C   0  0  0  0  0  0  0  0  0  0  0  0
   -2.5952   -3.0025    0.0000 C   0  0  0  0  0  0  0  0  0  0  0  0
   -1.2969   -2.2512    0.0000 C   0  0  0  0  0  0  0  0  0  0  0  0
   -6.4945   -0.7562    0.0000 C   0  0  0  0  0  0  0  0  0  0  0  0
   -7.7942   -0.0074    0.0000 C   0  0  0  0  0  0  0  0  0  0  0  0
   -9.0926   -0.7586    0.0000 C   0  0  0  0  0  0  0  0  0  0  0  0
  -10.3923   -0.0098    0.0000 O   0  0  0  0  0  0  0  0  0  0  0  0
  -11.6906   -0.7611    0.0000 C   0  0  0  0  0  0  0  0  0  0  0  0
  -12.9904   -0.0123    0.0000 C   0  0  0  0  0  0  0  0  0  0  0  0
  -14.2887   -0.7635    0.0000 C   0  0  0  0  0  0  0  0  0  0  0  0
  -14.2873   -2.2635    0.0000 C   0  0  0  0  0  0  0  0  0  0  0  0
  -12.9875   -3.0123    0.0000 C   0  0  0  0  0  0  0  0  0  0  0  0
  -11.6892   -2.2611    0.0000 C   0  0  0  0  0  0  0  0  0  0  0  0
  -15.5885   -0.0148    0.0000 C   0  0  0  0  0  0  0  0  0  0  0  0
  -16.3372   -1.3145    0.0000 O   0  0  0  0  0  0  0  0  0  0  0  0
  -16.8882    0.7340    0.0000 C   0  0  0  0  0  0  0  0  0  0  0  0
  -14.8397    1.2850    0.0000 C   0  0  0  0  0  0  0  0  0  0  0  0
   -9.0911   -2.2586    0.0000 C   0  0  0  0  0  0  0  0  0  0  0  0
   -7.7914   -3.0074    0.0000 C   0  0  0  0  0  0  0  0  0  0  0  0
   -6.4931   -2.2562    0.0000 C   0  0  0  0  0  0  0  0  0  0  0  0
  1  2  1  0  0  0  0
  2  3  1  0  0  0  0
  2 12  2  3  0  0  0
  3  4  1  0  0  0  0
  3  9  2  3  0  0  0
  4  5  2  3  0  0  0
  5  6  1  0  0  0  0
  6  7  1  0  0  0  0
  6  8  2  3  0  0  0
  8  9  1  0  0  0  0
  8 13  1  0  0  0  0
  9 10  1  0  0  0  0
 10 11  2  3  0  0  0
 11 12  1  0  0  0  0
 13 14  1  0  0  0  0
 13 29  2  3  0  0  0
 14 15  2  3  0  0  0
 15 16  1  0  0  0  0
 15 27  1  0  0  0  0
 16 17  1  0  0  0  0
 17 18  1  0  0  0  0
 17 22  2  3  0  0  0
 18 19  2  3  0  0  0
 19 20  1  0  0  0  0
 19 23  1  0  0  0  0
 20 21  2  3  0  0  0
 21 22  1  0  0  0  0
 23 24  1  0  0  0  0
 23 25  1  0  0  0  0
 23 26  1  0  0  0  0
 27 28  2  3  0  0  0
 28 29  1  0  0  0  0
M  END
>  <VC-4>
0.1118034

>  <VC-6>
0.0372678

>  <SPC-4>
5.3390155

>  <SwHBa>
33.513371

>  <SHCsats>
0.9336701

>  <SHother>
5.9824247

>  <SssCH2>
0

>  <ETA_Shape_Y>
0.31511

>  <ETA_dBetaP>
-0.034480002

>  <nAtomP>
23

>  <MDEC-24>
2.090848

>  <MDEC-33>
10.820949

>  <MDEC-34>
1.5504127

>  <MLFER_A>
0.34799999

>  <Classification>
0

$$$$
Clc1c2nc(C)c(nc2ccc1)-c1ccc(cc1)-c1cc(S(=O)(=O)C)ccc1
  MOE2013           2D

 28 31  0  0  0  0  0  0  0  0999 V2000
    0.0000   -0.0000    0.0000 Cl  0  0  0  0  0  0  0  0  0  0  0  0
    0.7424   -1.3034    0.0000 C   0  0  0  0  0  0  0  0  0  0  0  0
    2.2423   -1.3122    0.0000 C   0  0  0  0  0  0  0  0  0  0  0  0
    2.9999   -0.0176    0.0000 N   0  0  0  0  0  0  0  0  0  0  0  0
    4.4999   -0.0265    0.0000 C   0  0  0  0  0  0  0  0  0  0  0  0
    5.2575    1.2682    0.0000 C   0  0  0  0  0  0  0  0  0  0  0  0
    5.2423   -1.3299    0.0000 C   0  0  0  0  0  0  0  0  0  0  0  0
    4.4846   -2.6245    0.0000 N   0  0  0  0  0  0  0  0  0  0  0  0
    2.9847   -2.6157    0.0000 C   0  0  0  0  0  0  0  0  0  0  0  0
    2.2271   -3.9103    0.0000 C   0  0  0  0  0  0  0  0  0  0  0  0
    0.7271   -3.9015    0.0000 C   0  0  0  0  0  0  0  0  0  0  0  0
   -0.0153   -2.5980    0.0000 C   0  0  0  0  0  0  0  0  0  0  0  0
    6.7422   -1.3387    0.0000 C   0  0  0  0  0  0  0  0  0  0  0  0
    7.4999   -0.0441    0.0000 C   0  0  0  0  0  0  0  0  0  0  0  0
    8.9998   -0.0529    0.0000 C   0  0  0  0  0  0  0  0  0  0  0  0
    9.7422   -1.3563    0.0000 C   0  0  0  0  0  0  0  0  0  0  0  0
    8.9846   -2.6509    0.0000 C   0  0  0  0  0  0  0  0  0  0  0  0
    7.4846   -2.6421    0.0000 C   0  0  0  0  0  0  0  0  0  0  0  0
   11.2422   -1.3652    0.0000 C   0  0  0  0  0  0  0  0  0  0  0  0
   11.9845   -2.6686    0.0000 C   0  0  0  0  0  0  0  0  0  0  0  0
   13.4845   -2.6774    0.0000 C   0  0  0  0  0  0  0  0  0  0  0  0
   14.2268   -3.9808    0.0000 S   0  0  0  0  0  0  0  0  0  0  0  0
   15.5303   -3.2385    0.0000 O   0  0  0  0  0  0  0  0  0  0  0  0
   12.9234   -4.7232    0.0000 O   0  0  0  0  0  0  0  0  0  0  0  0
   14.9692   -5.2842    0.0000 C   0  0  0  0  0  0  0  0  0  0  0  0
   14.2421   -1.3828    0.0000 C   0  0  0  0  0  0  0  0  0  0  0  0
   13.4998   -0.0794    0.0000 C   0  0  0  0  0  0  0  0  0  0  0  0
   11.9998   -0.0705    0.0000 C   0  0  0  0  0  0  0  0  0  0  0  0
  1  2  1  0  0  0  0
  2  3  1  0  0  0  0
  2 12  2  3  0  0  0
  3  4  1  0  0  0  0
  3  9  2  3  0  0  0
  4  5  2  3  0  0  0
  5  6  1  0  0  0  0
  5  7  1  0  0  0  0
  7  8  2  3  0  0  0
  7 13  1  0  0  0  0
  8  9  1  0  0  0  0
  9 10  1  0  0  0  0
 10 11  2  3  0  0  0
 11 12  1  0  0  0  0
 13 14  1  0  0  0  0
 13 18  2  3  0  0  0
 14 15  2  3  0  0  0
 15 16  1  0  0  0  0
 16 17  2  3  0  0  0
 16 19  1  0  0  0  0
 17 18  1  0  0  0  0
 19 20  1  0  0  0  0
 19 28  2  3  0  0  0
 20 21  2  3  0  0  0
 21 22  1  0  0  0  0
 21 26  1  0  0  0  0
 22 23  2  0  0  0  0
 22 24  2  0  0  0  0
 22 25  1  0  0  0  0
 26 27  2  3  0  0  0
 27 28  1  0  0  0  0
M  END
>  <VC-4>
0.050999172

>  <VC-6>
0.016999723

>  <SPC-4>
5.5571656

>  <SwHBa>
29.797241

>  <SHCsats>
0

>  <SHother>
5.4315147

>  <SssCH2>
0

>  <ETA_Shape_Y>
0.3211

>  <ETA_dBetaP>
0.053569999

>  <nAtomP>
25

>  <MDEC-24>
0

>  <MDEC-33>
9.7629805

>  <MDEC-34>
0

>  <MLFER_A>
0.003

>  <Classification>
1

$$$$
FC(F)(F)c1c2ncc(C(=O)c3ccccc3)c(c2ccc1)-c1cc(OCc2ccc(cc2)[C@@H](Cc2ccc(cc2)-c2ccccc2)C(=O)[O-])ccc1
  MOE2013           2D

 53 59  0  0  1  0  0  0  0  0999 V2000
    0.0000   -0.0000    0.0000 F   0  0  0  0  0  0  0  0  0  0  0  0
    0.7481   -1.3001    0.0000 C   0  0  0  0  0  0  0  0  0  0  0  0
   -0.5520   -2.0482    0.0000 F   0  0  0  0  0  0  0  0  0  0  0  0
    2.0482   -0.5520    0.0000 F   0  0  0  0  0  0  0  0  0  0  0  0
    1.4962   -2.6003    0.0000 C   0  0  0  0  0  0  0  0  0  0  0  0
    0.7443   -3.8982    0.0000 C   0  0  0  0  0  0  0  0  0  0  0  0
   -0.7557   -3.8960    0.0000 N   0  0  0  0  0  0  0  0  0  0  0  0
   -1.5076   -5.1940    0.0000 C   0  0  0  0  0  0  0  0  0  0  0  0
   -0.7595   -6.4941    0.0000 C   0  0  0  0  0  0  0  0  0  0  0  0
   -1.5114   -7.7920    0.0000 C   0  0  0  0  0  0  0  0  0  0  0  0
   -0.7633   -9.0922    0.0000 O   0  0  0  0  0  0  0  0  0  0  0  0
   -3.0114   -7.7898    0.0000 C   0  0  0  0  0  0  0  0  0  0  0  0
   -3.7595   -6.4897    0.0000 C   0  0  0  0  0  0  0  0  0  0  0  0
   -5.2595   -6.4875    0.0000 C   0  0  0  0  0  0  0  0  0  0  0  0
   -6.0114   -7.7854    0.0000 C   0  0  0  0  0  0  0  0  0  0  0  0
   -5.2633   -9.0856    0.0000 C   0  0  0  0  0  0  0  0  0  0  0  0
   -3.7633   -9.0878    0.0000 C   0  0  0  0  0  0  0  0  0  0  0  0
    0.7405   -6.4963    0.0000 C   0  0  0  0  0  0  0  0  0  0  0  0
    1.4924   -5.1983    0.0000 C   0  0  0  0  0  0  0  0  0  0  0  0
    2.9924   -5.2005    0.0000 C   0  0  0  0  0  0  0  0  0  0  0  0
    3.7443   -3.9026    0.0000 C   0  0  0  0  0  0  0  0  0  0  0  0
    2.9962   -2.6025    0.0000 C   0  0  0  0  0  0  0  0  0  0  0  0
    1.4886   -7.7964    0.0000 C   0  0  0  0  0  0  0  0  0  0  0  0
    2.9886   -7.7986    0.0000 C   0  0  0  0  0  0  0  0  0  0  0  0
    3.7367   -9.0987    0.0000 C   0  0  0  0  0  0  0  0  0  0  0  0
    5.2367   -9.1009    0.0000 O   0  0  0  0  0  0  0  0  0  0  0  0
    5.9848  -10.4011    0.0000 C   0  0  0  0  0  0  0  0  0  0  0  0
    7.4848  -10.4033    0.0000 C   0  0  0  0  0  0  0  0  0  0  0  0
    8.2367   -9.1053    0.0000 C   0  0  0  0  0  0  0  0  0  0  0  0
    9.7367   -9.1075    0.0000 C   0  0  0  0  0  0  0  0  0  0  0  0
   10.4848  -10.4076    0.0000 C   0  0  0  0  0  0  0  0  0  0  0  0
    9.7329  -11.7056    0.0000 C   0  0  0  0  0  0  0  0  0  0  0  0
    8.2329  -11.7034    0.0000 C   0  0  0  0  0  0  0  0  0  0  0  0
   11.9848  -10.4098    0.0000 C   0  0  1  0  0  0  0  0  0  0  0  0
   12.7329  -11.7100    0.0000 C   0  0  0  0  0  0  0  0  0  0  0  0
   14.2329  -11.7122    0.0000 C   0  0  0  0  0  0  0  0  0  0  0  0
   14.9848  -10.4142    0.0000 C   0  0  0  0  0  0  0  0  0  0  0  0
   16.4848  -10.4164    0.0000 C   0  0  0  0  0  0  0  0  0  0  0  0
   17.2329  -11.7165    0.0000 C   0  0  0  0  0  0  0  0  0  0  0  0
   16.4810  -13.0145    0.0000 C   0  0  0  0  0  0  0  0  0  0  0  0
   14.9810  -13.0123    0.0000 C   0  0  0  0  0  0  0  0  0  0  0  0
   18.7329  -11.7187    0.0000 C   0  0  0  0  0  0  0  0  0  0  0  0
   19.4848  -10.4208    0.0000 C   0  0  0  0  0  0  0  0  0  0  0  0
   20.9848  -10.4230    0.0000 C   0  0  0  0  0  0  0  0  0  0  0  0
   21.7329  -11.7231    0.0000 C   0  0  0  0  0  0  0  0  0  0  0  0
   20.9810  -13.0211    0.0000 C   0  0  0  0  0  0  0  0  0  0  0  0
   19.4810  -13.0189    0.0000 C   0  0  0  0  0  0  0  0  0  0  0  0
   12.7367   -9.1119    0.0000 C   0  0  0  0  0  0  0  0  0  0  0  0
   11.9886   -7.8118    0.0000 O   0  0  0  0  0  0  0  0  0  0  0  0
   14.2367   -9.1141    0.0000 O   0  5  0  0  0  0  0  0  0  0  0  0
    2.9848  -10.3967    0.0000 C   0  0  0  0  0  0  0  0  0  0  0  0
    1.4848  -10.3945    0.0000 C   0  0  0  0  0  0  0  0  0  0  0  0
    0.7367   -9.0944    0.0000 C   0  0  0  0  0  0  0  0  0  0  0  0
  1  2  1  0  0  0  0
  2  3  1  0  0  0  0
  2  4  1  0  0  0  0
  2  5  1  0  0  0  0
  5  6  1  0  0  0  0
  5 22  2  3  0  0  0
  6  7  2  3  0  0  0
  6 19  1  0  0  0  0
  7  8  1  0  0  0  0
  8  9  2  3  0  0  0
  9 10  1  0  0  0  0
  9 18  1  0  0  0  0
 10 11  2  0  0  0  0
 10 12  1  0  0  0  0
 12 13  1  0  0  0  0
 12 17  2  3  0  0  0
 13 14  2  3  0  0  0
 14 15  1  0  0  0  0
 15 16  2  3  0  0  0
 16 17  1  0  0  0  0
 18 19  2  3  0  0  0
 18 23  1  0  0  0  0
 19 20  1  0  0  0  0
 20 21  2  3  0  0  0
 21 22  1  0  0  0  0
 23 24  2  3  0  0  0
 23 53  1  0  0  0  0
 24 25  1  0  0  0  0
 25 26  1  0  0  0  0
 25 51  2  3  0  0  0
 26 27  1  0  0  0  0
 27 28  1  0  0  0  0
 28 29  1  0  0  0  0
 28 33  2  3  0  0  0
 29 30  2  3  0  0  0
 30 31  1  0  0  0  0
 31 32  2  3  0  0  0
 32 33  1  0  0  0  0
 34 31  1  6  0  0  0
 34 35  1  0  0  0  0
 34 48  1  0  0  0  0
 35 36  1  0  0  0  0
 36 37  1  0  0  0  0
 36 41  2  3  0  0  0
 37 38  2  3  0  0  0
 38 39  1  0  0  0  0
 39 40  2  3  0  0  0
 39 42  1  0  0  0  0
 40 41  1  0  0  0  0
 42 43  1  0  0  0  0
 42 47  2  3  0  0  0
 43 44  2  3  0  0  0
 44 45  1  0  0  0  0
 45 46  2  3  0  0  0
 46 47  1  0  0  0  0
 48 49  2  0  0  0  0
 48 50  1  0  0  0  0
 51 52  1  0  0  0  0
 52 53  2  3  0  0  0
M  CHG  1  50  -1
M  END
>  <VC-4>
0.013498731

>  <VC-6>
0.0038967479

>  <SPC-4>
8.5091181

>  <SwHBa>
48.748325

>  <SHCsats>
1.6238661

>  <SHother>
14.224833

>  <SssCH2>
0.39756429

>  <ETA_Shape_Y>
0.31885001

>  <ETA_dBetaP>
0.01887

>  <nAtomP>
25

>  <MDEC-24>
2.7918692

>  <MDEC-33>
19.823193

>  <MDEC-34>
2.303879

>  <MLFER_A>
0.24600001

>  <Classification>
0

$$$$
FC(F)(F)c1c2ncc(C(=O)c3ccccc3)c(c2ccc1)-c1cc(OCc2ccc(cc2)[C@@H](Cc2ccc(cc2)C(C)(C)C)C(=O)[O-])ccc1
  MOE2013           2D

 51 56  0  0  1  0  0  0  0  0999 V2000
   -0.0000   -0.0000    0.0000 F   0  0  0  0  0  0  0  0  0  0  0  0
    0.7481    1.3002    0.0000 C   0  0  0  0  0  0  0  0  0  0  0  0
   -0.5521    2.0482    0.0000 F   0  0  0  0  0  0  0  0  0  0  0  0
    2.0482    0.5521    0.0000 F   0  0  0  0  0  0  0  0  0  0  0  0
    1.4961    2.6003    0.0000 C   0  0  0  0  0  0  0  0  0  0  0  0
    0.7442    3.8982    0.0000 C   0  0  0  0  0  0  0  0  0  0  0  0
   -0.7558    3.8960    0.0000 N   0  0  0  0  0  0  0  0  0  0  0  0
   -1.5077    5.1939    0.0000 C   0  0  0  0  0  0  0  0  0  0  0  0
   -0.7597    6.4941    0.0000 C   0  0  0  0  0  0  0  0  0  0  0  0
   -1.5116    7.7920    0.0000 C   0  0  0  0  0  0  0  0  0  0  0  0
   -0.7635    9.0921    0.0000 O   0  0  0  0  0  0  0  0  0  0  0  0
   -3.0116    7.7898    0.0000 C   0  0  0  0  0  0  0  0  0  0  0  0
   -3.7597    6.4896    0.0000 C   0  0  0  0  0  0  0  0  0  0  0  0
   -5.2596    6.4874    0.0000 C   0  0  0  0  0  0  0  0  0  0  0  0
   -6.0116    7.7853    0.0000 C   0  0  0  0  0  0  0  0  0  0  0  0
   -5.2635    9.0855    0.0000 C   0  0  0  0  0  0  0  0  0  0  0  0
   -3.7635    9.0877    0.0000 C   0  0  0  0  0  0  0  0  0  0  0  0
    0.7403    6.4963    0.0000 C   0  0  0  0  0  0  0  0  0  0  0  0
    1.4923    5.1984    0.0000 C   0  0  0  0  0  0  0  0  0  0  0  0
    2.9923    5.2006    0.0000 C   0  0  0  0  0  0  0  0  0  0  0  0
    3.7442    3.9027    0.0000 C   0  0  0  0  0  0  0  0  0  0  0  0
    2.9961    2.6025    0.0000 C   0  0  0  0  0  0  0  0  0  0  0  0
    1.4884    7.7964    0.0000 C   0  0  0  0  0  0  0  0  0  0  0  0
    2.9884    7.7987    0.0000 C   0  0  0  0  0  0  0  0  0  0  0  0
    3.7365    9.0988    0.0000 C   0  0  0  0  0  0  0  0  0  0  0  0
    5.2365    9.1011    0.0000 O   0  0  0  0  0  0  0  0  0  0  0  0
    5.9845   10.4012    0.0000 C   0  0  0  0  0  0  0  0  0  0  0  0
    7.4845   10.4034    0.0000 C   0  0  0  0  0  0  0  0  0  0  0  0
    8.2326   11.7036    0.0000 C   0  0  0  0  0  0  0  0  0  0  0  0
    9.7326   11.7058    0.0000 C   0  0  0  0  0  0  0  0  0  0  0  0
   10.4845   10.4079    0.0000 C   0  0  0  0  0  0  0  0  0  0  0  0
    9.7365    9.1077    0.0000 C   0  0  0  0  0  0  0  0  0  0  0  0
    8.2365    9.1055    0.0000 C   0  0  0  0  0  0  0  0  0  0  0  0
   11.9845   10.4101    0.0000 C   0  0  1  0  0  0  0  0  0  0  0  0
   12.7365    9.1122    0.0000 C   0  0  0  0  0  0  0  0  0  0  0  0
   14.2365    9.1144    0.0000 C   0  0  0  0  0  0  0  0  0  0  0  0
   14.9884    7.8165    0.0000 C   0  0  0  0  0  0  0  0  0  0  0  0
   16.4884    7.8187    0.0000 C   0  0  0  0  0  0  0  0  0  0  0  0
   17.2365    9.1189    0.0000 C   0  0  0  0  0  0  0  0  0  0  0  0
   16.4845   10.4168    0.0000 C   0  0  0  0  0  0  0  0  0  0  0  0
   14.9845   10.4146    0.0000 C   0  0  0  0  0  0  0  0  0  0  0  0
   18.7365    9.1211    0.0000 C   0  0  0  0  0  0  0  0  0  0  0  0
   18.7387    7.6211    0.0000 C   0  0  0  0  0  0  0  0  0  0  0  0
   18.7342   10.6211    0.0000 C   0  0  0  0  0  0  0  0  0  0  0  0
   20.2365    9.1234    0.0000 C   0  0  0  0  0  0  0  0  0  0  0  0
   12.7326   11.7103    0.0000 C   0  0  0  0  0  0  0  0  0  0  0  0
   14.2326   11.7125    0.0000 O   0  0  0  0  0  0  0  0  0  0  0  0
   11.9807   13.0082    0.0000 O   0  5  0  0  0  0  0  0  0  0  0  0
    2.9845   10.3968    0.0000 C   0  0  0  0  0  0  0  0  0  0  0  0
    1.4846   10.3945    0.0000 C   0  0  0  0  0  0  0  0  0  0  0  0
    0.7365    9.0944    0.0000 C   0  0  0  0  0  0  0  0  0  0  0  0
  1  2  1  0  0  0  0
  2  3  1  0  0  0  0
  2  4  1  0  0  0  0
  2  5  1  0  0  0  0
  5  6  1  0  0  0  0
  5 22  2  3  0  0  0
  6  7  2  3  0  0  0
  6 19  1  0  0  0  0
  7  8  1  0  0  0  0
  8  9  2  3  0  0  0
  9 10  1  0  0  0  0
  9 18  1  0  0  0  0
 10 11  2  0  0  0  0
 10 12  1  0  0  0  0
 12 13  1  0  0  0  0
 12 17  2  3  0  0  0
 13 14  2  3  0  0  0
 14 15  1  0  0  0  0
 15 16  2  3  0  0  0
 16 17  1  0  0  0  0
 18 19  2  3  0  0  0
 18 23  1  0  0  0  0
 19 20  1  0  0  0  0
 20 21  2  3  0  0  0
 21 22  1  0  0  0  0
 23 24  2  3  0  0  0
 23 51  1  0  0  0  0
 24 25  1  0  0  0  0
 25 26  1  0  0  0  0
 25 49  2  3  0  0  0
 26 27  1  0  0  0  0
 27 28  1  0  0  0  0
 28 29  1  0  0  0  0
 28 33  2  3  0  0  0
 29 30  2  3  0  0  0
 30 31  1  0  0  0  0
 31 32  2  3  0  0  0
 32 33  1  0  0  0  0
 34 31  1  6  0  0  0
 34 35  1  0  0  0  0
 34 46  1  0  0  0  0
 35 36  1  0  0  0  0
 36 37  1  0  0  0  0
 36 41  2  3  0  0  0
 37 38  2  3  0  0  0
 38 39  1  0  0  0  0
 39 40  2  3  0  0  0
 39 42  1  0  0  0  0
 40 41  1  0  0  0  0
 42 43  1  0  0  0  0
 42 44  1  0  0  0  0
 42 45  1  0  0  0  0
 46 47  2  0  0  0  0
 46 48  1  0  0  0  0
 49 50  1  0  0  0  0
 50 51  2  3  0  0  0
M  CHG  1  48  -1
M  END
>  <VC-4>
0.26349872

>  <VC-6>
0.087230079

>  <SPC-4>
9.4281902

>  <SwHBa>
38.126511

>  <SHCsats>
2.657259

>  <SHother>
11.554811

>  <SssCH2>
0.42799133

>  <ETA_Shape_Y>
0.31132999

>  <ETA_dBetaP>
-0.039220002

>  <nAtomP>
25

>  <MDEC-24>
4.9074721

>  <MDEC-33>
18.672995

>  <MDEC-34>
3.7024257

>  <MLFER_A>
0.24600001

>  <Classification>
0

$$$$
FC(F)(F)C(O)(C(F)(F)F)c1ccc(N(Cc2ccccc2)CC)cc1
  MOE2013           2D

 26 27  0  0  1  0  0  0  0  0999 V2000
    0.0000    0.0000    0.0000 F   0  0  0  0  0  0  0  0  0  0  0  0
    0.7573   -1.2948    0.0000 C   0  0  0  0  0  0  0  0  0  0  0  0
   -0.5376   -2.0521    0.0000 F   0  0  0  0  0  0  0  0  0  0  0  0
    2.0521   -0.5376    0.0000 F   0  0  0  0  0  0  0  0  0  0  0  0
    1.5145   -2.5897    0.0000 C   0  0  0  0  0  0  0  0  0  0  0  0
    0.2197   -3.3469    0.0000 O   0  0  0  0  0  0  0  0  0  0  0  0
    2.2718   -3.8845    0.0000 C   0  0  0  0  0  0  0  0  0  0  0  0
    3.0290   -5.1793    0.0000 F   0  0  0  0  0  0  0  0  0  0  0  0
    3.5666   -3.1272    0.0000 F   0  0  0  0  0  0  0  0  0  0  0  0
    0.9769   -4.6417    0.0000 F   0  0  0  0  0  0  0  0  0  0  0  0
    2.8093   -1.8324    0.0000 C   0  0  0  0  0  0  0  0  0  0  0  0
    2.8009   -0.3324    0.0000 C   0  0  0  0  0  0  0  0  0  0  0  0
    4.0958    0.4248    0.0000 C   0  0  0  0  0  0  0  0  0  0  0  0
    5.3990   -0.3179    0.0000 C   0  0  0  0  0  0  0  0  0  0  0  0
    6.6938    0.4393    0.0000 N   0  0  3  0  0  0  0  0  0  0  0  0
    7.9970   -0.3034    0.0000 C   0  0  0  0  0  0  0  0  0  0  0  0
    9.2918    0.4539    0.0000 C   0  0  0  0  0  0  0  0  0  0  0  0
   10.5950   -0.2889    0.0000 C   0  0  0  0  0  0  0  0  0  0  0  0
   11.8899    0.4684    0.0000 C   0  0  0  0  0  0  0  0  0  0  0  0
   11.8815    1.9684    0.0000 C   0  0  0  0  0  0  0  0  0  0  0  0
   10.5783    2.7111    0.0000 C   0  0  0  0  0  0  0  0  0  0  0  0
    9.2835    1.9539    0.0000 C   0  0  0  0  0  0  0  0  0  0  0  0
    6.6854    1.9393    0.0000 C   0  0  0  0  0  0  0  0  0  0  0  0
    5.3822    2.6821    0.0000 C   0  0  0  0  0  0  0  0  0  0  0  0
    5.4074   -1.8179    0.0000 C   0  0  0  0  0  0  0  0  0  0  0  0
    4.1125   -2.5751    0.0000 C   0  0  0  0  0  0  0  0  0  0  0  0
  1  2  1  0  0  0  0
  2  3  1  0  0  0  0
  2  4  1  0  0  0  0
  2  5  1  0  0  0  0
  5  6  1  0  0  0  0
  5  7  1  0  0  0  0
  5 11  1  0  0  0  0
  7  8  1  0  0  0  0
  7  9  1  0  0  0  0
  7 10  1  0  0  0  0
 11 12  1  0  0  0  0
 11 26  2  3  0  0  0
 12 13  2  3  0  0  0
 13 14  1  0  0  0  0
 14 15  1  0  0  0  0
 14 25  2  3  0  0  0
 15 16  1  0  0  0  0
 15 23  1  0  0  0  0
 16 17  1  0  0  0  0
 17 18  1  0  0  0  0
 17 22  2  3  0  0  0
 18 19  2  3  0  0  0
 19 20  1  0  0  0  0
 20 21  2  3  0  0  0
 21 22  1  0  0  0  0
 23 24  1  0  0  0  0
 25 26  1  0  0  0  0
M  END
>  <VC-4>
0.054948311

>  <VC-6>
0.05209782

>  <SPC-4>
7.5446978

>  <SwHBa>
12.958703

>  <SHCsats>
1.0428406

>  <SHother>
5.1460681

>  <SssCH2>
0.94101852

>  <ETA_Shape_Y>
0.16597

>  <ETA_dBetaP>
-0.26923001

>  <nAtomP>
7

>  <MDEC-24>
5.5986767

>  <MDEC-33>
0.79370052

>  <MDEC-34>
2.3471363

>  <MLFER_A>
0.85399997

>  <Classification>
0

$$$$
Clc1c2ncc(C)c(c2ccc1)-c1cc(Oc2cc(ccc2)C(=O)NC)ccc1
  MOE2013           2D

 29 32  0  0  0  0  0  0  0  0999 V2000
    0.0000   -0.0000    0.0000 Cl  0  0  0  0  0  0  0  0  0  0  0  0
    1.2958   -0.7557    0.0000 C   0  0  0  0  0  0  0  0  0  0  0  0
    2.5981   -0.0113    0.0000 C   0  0  0  0  0  0  0  0  0  0  0  0
    2.6046    1.4886    0.0000 N   0  0  0  0  0  0  0  0  0  0  0  0
    3.9069    2.2330    0.0000 C   0  0  0  0  0  0  0  0  0  0  0  0
    5.2026    1.4773    0.0000 C   0  0  0  0  0  0  0  0  0  0  0  0
    6.5049    2.2216    0.0000 C   0  0  0  0  0  0  0  0  0  0  0  0
    5.1961   -0.0227    0.0000 C   0  0  0  0  0  0  0  0  0  0  0  0
    3.8938   -0.7670    0.0000 C   0  0  0  0  0  0  0  0  0  0  0  0
    3.8873   -2.2670    0.0000 C   0  0  0  0  0  0  0  0  0  0  0  0
    2.5850   -3.0113    0.0000 C   0  0  0  0  0  0  0  0  0  0  0  0
    1.2892   -2.2556    0.0000 C   0  0  0  0  0  0  0  0  0  0  0  0
    6.4919   -0.7783    0.0000 C   0  0  0  0  0  0  0  0  0  0  0  0
    7.7942   -0.0340    0.0000 C   0  0  0  0  0  0  0  0  0  0  0  0
    9.0899   -0.7897    0.0000 C   0  0  0  0  0  0  0  0  0  0  0  0
   10.3922   -0.0453    0.0000 O   0  0  0  0  0  0  0  0  0  0  0  0
   11.6880   -0.8010    0.0000 C   0  0  0  0  0  0  0  0  0  0  0  0
   12.9903   -0.0567    0.0000 C   0  0  0  0  0  0  0  0  0  0  0  0
   14.2860   -0.8123    0.0000 C   0  0  0  0  0  0  0  0  0  0  0  0
   14.2795   -2.3123    0.0000 C   0  0  0  0  0  0  0  0  0  0  0  0
   12.9772   -3.0567    0.0000 C   0  0  0  0  0  0  0  0  0  0  0  0
   11.6814   -2.3010    0.0000 C   0  0  0  0  0  0  0  0  0  0  0  0
   15.5883   -0.0680    0.0000 C   0  0  0  0  0  0  0  0  0  0  0  0
   15.5949    1.4320    0.0000 O   0  0  0  0  0  0  0  0  0  0  0  0
   16.8841   -0.8237    0.0000 N   0  0  0  0  0  0  0  0  0  0  0  0
   18.1864   -0.0794    0.0000 C   0  0  0  0  0  0  0  0  0  0  0  0
    9.0834   -2.2897    0.0000 C   0  0  0  0  0  0  0  0  0  0  0  0
    7.7811   -3.0340    0.0000 C   0  0  0  0  0  0  0  0  0  0  0  0
    6.4853   -2.2783    0.0000 C   0  0  0  0  0  0  0  0  0  0  0  0
  1  2  1  0  0  0  0
  2  3  1  0  0  0  0
  2 12  2  3  0  0  0
  3  4  1  0  0  0  0
  3  9  2  3  0  0  0
  4  5  2  3  0  0  0
  5  6  1  0  0  0  0
  6  7  1  0  0  0  0
  6  8  2  3  0  0  0
  8  9  1  0  0  0  0
  8 13  1  0  0  0  0
  9 10  1  0  0  0  0
 10 11  2  3  0  0  0
 11 12  1  0  0  0  0
 13 14  1  0  0  0  0
 13 29  2  3  0  0  0
 14 15  2  3  0  0  0
 15 16  1  0  0  0  0
 15 27  1  0  0  0  0
 16 17  1  0  0  0  0
 17 18  1  0  0  0  0
 17 22  2  3  0  0  0
 18 19  2  3  0  0  0
 19 20  1  0  0  0  0
 19 23  1  0  0  0  0
 20 21  2  3  0  0  0
 21 22  1  0  0  0  0
 23 24  2  0  0  0  0
 23 25  1  0  0  0  0
 25 26  1  0  0  0  0
 27 28  2  3  0  0  0
 28 29  1  0  0  0  0
M  END
>  <VC-4>
0

>  <VC-6>
0

>  <SPC-4>
4.5634923

>  <SwHBa>
32.315525

>  <SHCsats>
0

>  <SHother>
6.3113008

>  <SssCH2>
0

>  <ETA_Shape_Y>
0.35258999

>  <ETA_dBetaP>
0

>  <nAtomP>
26

>  <MDEC-24>
0

>  <MDEC-33>
12.101068

>  <MDEC-34>
0

>  <MLFER_A>
0.37099999

>  <Classification>
1

$$$$
O[C@]12C[C@@H](O)CC[C@]1(C)[C@]1(O)[C@H]([C@@H]3CC[C@H]([C@H](C)[C@H]4C[C@@]4([C@H](C(C)C)C)C)[C@]3(C[C@H]1O)C)C[C@H]2O
  MOE2013           2D

 35 39  0  0  1  0  0  0  0  0999 V2000
    0.0000   -0.0000    0.0000 O   0  0  0  0  0  0  0  0  0  0  0  0
    0.7689   -1.2879    0.0000 C   0  0  2  0  0  0  0  0  0  0  0  0
   -0.7311   -1.2837    0.0000 C   0  0  0  0  0  0  0  0  0  0  0  0
   -1.4848   -2.5806    0.0000 C   0  0  1  0  0  0  0  0  0  0  0  0
   -2.9848   -2.5763    0.0000 O   0  0  0  0  0  0  0  0  0  0  0  0
   -0.7385   -3.8817    0.0000 C   0  0  0  0  0  0  0  0  0  0  0  0
    0.7615   -3.8860    0.0000 C   0  0  0  0  0  0  0  0  0  0  0  0
    1.5152   -2.5891    0.0000 C   0  0  1  0  0  0  0  0  0  0  0  0
    2.2841   -3.8770    0.0000 C   0  0  0  0  0  0  0  0  0  0  0  0
    3.0152   -2.5933    0.0000 C   0  0  2  0  0  0  0  0  0  0  0  0
    4.5151   -2.5714    0.0000 O   0  0  0  0  0  0  0  0  0  0  0  0
    3.7689   -1.2964    0.0000 C   0  0  2  0  0  0  0  0  0  0  0  0
    5.2689   -1.3007    0.0000 C   0  0  2  0  0  0  0  0  0  0  0  0
    6.2757   -0.1888    0.0000 C   0  0  0  0  0  0  0  0  0  0  0  0
    7.6443   -0.8028    0.0000 C   0  0  0  0  0  0  0  0  0  0  0  0
    7.4833   -2.2942    0.0000 C   0  0  2  0  0  0  0  0  0  0  0  0
    8.5952   -3.3010    0.0000 C   0  0  2  0  0  0  0  0  0  0  0  0
    8.2791   -4.7673    0.0000 C   0  0  0  0  0  0  0  0  0  0  0  0
   10.0231   -2.8415    0.0000 C   0  0  1  0  0  0  0  0  0  0  0  0
   11.0299   -1.7297    0.0000 C   0  0  0  0  0  0  0  0  0  0  0  0
   11.4894   -3.1576    0.0000 C   0  0  2  0  0  0  0  0  0  0  0  0
   12.9844   -3.2795    0.0000 C   0  0  2  0  0  0  0  0  0  0  0  0
   13.8375   -2.0457    0.0000 C   0  0  0  0  0  0  0  0  0  0  0  0
   15.3326   -2.1676    0.0000 C   0  0  0  0  0  0  0  0  0  0  0  0
   13.1956   -0.6900    0.0000 C   0  0  0  0  0  0  0  0  0  0  0  0
   13.6264   -4.6352    0.0000 C   0  0  0  0  0  0  0  0  0  0  0  0
   11.7586   -4.6332    0.0000 C   0  0  0  0  0  0  0  0  0  0  0  0
    6.0152   -2.6019    0.0000 C   0  0  1  0  0  0  0  0  0  0  0  0
    5.2615   -3.8988    0.0000 C   0  0  0  0  0  0  0  0  0  0  0  0
    3.7615   -3.8945    0.0000 C   0  0  1  0  0  0  0  0  0  0  0  0
    3.0078   -5.1914    0.0000 O   0  0  0  0  0  0  0  0  0  0  0  0
    6.8934   -3.8179    0.0000 C   0  0  0  0  0  0  0  0  0  0  0  0
    3.0226    0.0047    0.0000 C   0  0  0  0  0  0  0  0  0  0  0  0
    1.5226    0.0090    0.0000 C   0  0  1  0  0  0  0  0  0  0  0  0
    0.7763    1.3101    0.0000 O   0  0  0  0  0  0  0  0  0  0  0  0
  2  1  1  1  0  0  0
  2  3  1  0  0  0  0
  2  8  1  0  0  0  0
  2 34  1  0  0  0  0
  3  4  1  0  0  0  0
  4  5  1  6  0  0  0
  4  6  1  0  0  0  0
  6  7  1  0  0  0  0
  7  8  1  0  0  0  0
  8  9  1  6  0  0  0
  8 10  1  0  0  0  0
 10 11  1  1  0  0  0
 10 12  1  0  0  0  0
 10 30  1  0  0  0  0
 12 13  1  0  0  0  0
 12 33  1  1  0  0  0
 13 14  1  6  0  0  0
 13 28  1  0  0  0  0
 14 15  1  0  0  0  0
 16 15  1  6  0  0  0
 16 17  1  0  0  0  0
 16 28  1  0  0  0  0
 17 18  1  1  0  0  0
 17 19  1  0  0  0  0
 19 20  1  1  0  0  0
 19 21  1  0  0  0  0
 20 21  1  0  0  0  0
 21 22  1  0  0  0  0
 21 27  1  1  0  0  0
 22 23  1  0  0  0  0
 22 26  1  6  0  0  0
 23 24  1  0  0  0  0
 23 25  1  0  0  0  0
 28 29  1  0  0  0  0
 28 32  1  6  0  0  0
 29 30  1  0  0  0  0
 30 31  1  1  0  0  0
 33 34  1  0  0  0  0
 34 35  1  6  0  0  0
M  END
>  <VC-4>
0.40700194

>  <VC-6>
0.49705958

>  <SPC-4>
13.856582

>  <SwHBa>
0

>  <SHCsats>
9.3835125

>  <SHother>
0

>  <SssCH2>
5.1860924

>  <ETA_Shape_Y>
0.30000001

>  <ETA_dBetaP>
-0.59285998

>  <nAtomP>
0

>  <MDEC-24>
11.676096

>  <MDEC-33>
10.931471

>  <MDEC-34>
14.11854

>  <MLFER_A>
1.55

>  <Classification>
0

$$$$
Clc1cc(ccc1N(Cc1ccccc1)CC(F)(F)F)C(O)(C(F)(F)F)C(F)(F)F
  MOE2013           2D

 30 31  0  0  1  0  0  0  0  0999 V2000
   -0.0000    0.0000    0.0000 Cl  0  0  0  0  0  0  0  0  0  0  0  0
   -0.7509    1.2985    0.0000 C   0  0  0  0  0  0  0  0  0  0  0  0
   -2.2509    1.2975    0.0000 C   0  0  0  0  0  0  0  0  0  0  0  0
   -3.0017    2.5961    0.0000 C   0  0  0  0  0  0  0  0  0  0  0  0
   -2.2526    3.8956    0.0000 C   0  0  0  0  0  0  0  0  0  0  0  0
   -0.7526    3.8966    0.0000 C   0  0  0  0  0  0  0  0  0  0  0  0
   -0.0017    2.5981    0.0000 C   0  0  0  0  0  0  0  0  0  0  0  0
    1.4983    2.5991    0.0000 N   0  0  3  0  0  0  0  0  0  0  0  0
    2.2491    1.3005    0.0000 C   0  0  0  0  0  0  0  0  0  0  0  0
    3.7491    1.3015    0.0000 C   0  0  0  0  0  0  0  0  0  0  0  0
    4.4983    2.6011    0.0000 C   0  0  0  0  0  0  0  0  0  0  0  0
    5.9983    2.6021    0.0000 C   0  0  0  0  0  0  0  0  0  0  0  0
    6.7491    1.3035    0.0000 C   0  0  0  0  0  0  0  0  0  0  0  0
    6.0000    0.0040    0.0000 C   0  0  0  0  0  0  0  0  0  0  0  0
    4.5000    0.0030    0.0000 C   0  0  0  0  0  0  0  0  0  0  0  0
    2.2474    3.8986    0.0000 C   0  0  0  0  0  0  0  0  0  0  0  0
    1.4965    5.1972    0.0000 C   0  0  0  0  0  0  0  0  0  0  0  0
    0.7457    6.4957    0.0000 F   0  0  0  0  0  0  0  0  0  0  0  0
    0.1980    4.4463    0.0000 F   0  0  0  0  0  0  0  0  0  0  0  0
    2.7951    5.9480    0.0000 F   0  0  0  0  0  0  0  0  0  0  0  0
   -4.5017    2.5951    0.0000 C   0  0  0  0  0  0  0  0  0  0  0  0
   -6.0017    2.5941    0.0000 O   0  0  0  0  0  0  0  0  0  0  0  0
   -4.5007    1.0951    0.0000 C   0  0  0  0  0  0  0  0  0  0  0  0
   -6.0007    1.0941    0.0000 F   0  0  0  0  0  0  0  0  0  0  0  0
   -3.0007    1.0961    0.0000 F   0  0  0  0  0  0  0  0  0  0  0  0
   -4.4997   -0.4049    0.0000 F   0  0  0  0  0  0  0  0  0  0  0  0
   -4.5027    4.0951    0.0000 C   0  0  0  0  0  0  0  0  0  0  0  0
   -6.0027    4.0941    0.0000 F   0  0  0  0  0  0  0  0  0  0  0  0
   -4.5037    5.5951    0.0000 F   0  0  0  0  0  0  0  0  0  0  0  0
   -3.0027    4.0961    0.0000 F   0  0  0  0  0  0  0  0  0  0  0  0
  1  2  1  0  0  0  0
  2  3  1  0  0  0  0
  2  7  2  3  0  0  0
  3  4  2  3  0  0  0
  4  5  1  0  0  0  0
  4 21  1  0  0  0  0
  5  6  2  3  0  0  0
  6  7  1  0  0  0  0
  7  8  1  0  0  0  0
  8  9  1  0  0  0  0
  8 16  1  0  0  0  0
  9 10  1  0  0  0  0
 10 11  1  0  0  0  0
 10 15  2  3  0  0  0
 11 12  2  3  0  0  0
 12 13  1  0  0  0  0
 13 14  2  3  0  0  0
 14 15  1  0  0  0  0
 16 17  1  0  0  0  0
 17 18  1  0  0  0  0
 17 19  1  0  0  0  0
 17 20  1  0  0  0  0
 21 22  1  0  0  0  0
 21 23  1  0  0  0  0
 21 27  1  0  0  0  0
 23 24  1  0  0  0  0
 23 25  1  0  0  0  0
 23 26  1  0  0  0  0
 27 28  1  0  0  0  0
 27 29  1  0  0  0  0
 27 30  1  0  0  0  0
M  END
>  <VC-4>
0.074038401

>  <VC-6>
0.05209782

>  <SPC-4>
8.5217924

>  <SwHBa>
8.1681414

>  <SHCsats>
1.0913366

>  <SHother>
4.9987407

>  <SssCH2>
-1.7172608

>  <ETA_Shape_Y>
0.18435

>  <ETA_dBetaP>
-0.33333001

>  <nAtomP>
7

>  <MDEC-24>
7.1051936

>  <MDEC-33>
2.1822472

>  <MDEC-34>
4.1399655

>  <MLFER_A>
0.85399997

>  <Classification>
0

$$$$
Clc1ccc(cc1)-c1n(nc2c1cccc2C(F)(F)F)Cc1ccc(cc1)C(F)(F)F
  MOE2013           2D

 31 34  0  0  0  0  0  0  0  0999 V2000
   -0.0000   -0.0000    0.0000 Cl  0  0  0  0  0  0  0  0  0  0  0  0
    0.7432    1.3030    0.0000 C   0  0  0  0  0  0  0  0  0  0  0  0
   -0.0136    2.5980    0.0000 C   0  0  0  0  0  0  0  0  0  0  0  0
    0.7296    3.9010    0.0000 C   0  0  0  0  0  0  0  0  0  0  0  0
    2.2295    3.9089    0.0000 C   0  0  0  0  0  0  0  0  0  0  0  0
    2.9863    2.6138    0.0000 C   0  0  0  0  0  0  0  0  0  0  0  0
    2.2432    1.3108    0.0000 C   0  0  0  0  0  0  0  0  0  0  0  0
    2.9727    5.2118    0.0000 C   0  0  0  0  0  0  0  0  0  0  0  0
    4.4637    5.3764    0.0000 N   0  0  0  0  0  0  0  0  0  0  0  0
    4.7678    6.8453    0.0000 N   0  0  0  0  0  0  0  0  0  0  0  0
    3.4649    7.5884    0.0000 C   0  0  0  0  0  0  0  0  0  0  0  0
    2.3554    6.5789    0.0000 C   0  0  0  0  0  0  0  0  0  0  0  0
    0.9264    7.0349    0.0000 C   0  0  0  0  0  0  0  0  0  0  0  0
    0.6069    8.5005    0.0000 C   0  0  0  0  0  0  0  0  0  0  0  0
    1.7163    9.5100    0.0000 C   0  0  0  0  0  0  0  0  0  0  0  0
    3.1453    9.0540    0.0000 C   0  0  0  0  0  0  0  0  0  0  0  0
    4.2548   10.0635    0.0000 C   0  0  0  0  0  0  0  0  0  0  0  0
    5.2643    8.9541    0.0000 F   0  0  0  0  0  0  0  0  0  0  0  0
    3.2452   11.1730    0.0000 F   0  0  0  0  0  0  0  0  0  0  0  0
    5.3642   11.0730    0.0000 F   0  0  0  0  0  0  0  0  0  0  0  0
    5.4732    4.2670    0.0000 C   0  0  0  0  0  0  0  0  0  0  0  0
    6.9388    4.5865    0.0000 C   0  0  0  0  0  0  0  0  0  0  0  0
    7.3948    6.0155    0.0000 C   0  0  0  0  0  0  0  0  0  0  0  0
    8.8604    6.3351    0.0000 C   0  0  0  0  0  0  0  0  0  0  0  0
    9.8699    5.2256    0.0000 C   0  0  0  0  0  0  0  0  0  0  0  0
    9.4138    3.7966    0.0000 C   0  0  0  0  0  0  0  0  0  0  0  0
    7.9483    3.4771    0.0000 C   0  0  0  0  0  0  0  0  0  0  0  0
   11.3355    5.5452    0.0000 C   0  0  0  0  0  0  0  0  0  0  0  0
   12.8010    5.8647    0.0000 F   0  0  0  0  0  0  0  0  0  0  0  0
   11.0159    7.0108    0.0000 F   0  0  0  0  0  0  0  0  0  0  0  0
   11.6550    4.0796    0.0000 F   0  0  0  0  0  0  0  0  0  0  0  0
  1  2  1  0  0  0  0
  2  3  1  0  0  0  0
  2  7  2  3  0  0  0
  3  4  2  3  0  0  0
  4  5  1  0  0  0  0
  5  6  2  3  0  0  0
  5  8  1  0  0  0  0
  6  7  1  0  0  0  0
  8  9  1  0  0  0  0
  8 12  2  3  0  0  0
  9 10  1  0  0  0  0
  9 21  1  0  0  0  0
 10 11  2  3  0  0  0
 11 12  1  0  0  0  0
 11 16  1  0  0  0  0
 12 13  1  0  0  0  0
 13 14  2  3  0  0  0
 14 15  1  0  0  0  0
 15 16  2  3  0  0  0
 16 17  1  0  0  0  0
 17 18  1  0  0  0  0
 17 19  1  0  0  0  0
 17 20  1  0  0  0  0
 21 22  1  0  0  0  0
 22 23  1  0  0  0  0
 22 27  2  3  0  0  0
 23 24  2  3  0  0  0
 24 25  1  0  0  0  0
 25 26  2  3  0  0  0
 25 28  1  0  0  0  0
 26 27  1  0  0  0  0
 28 29  1  0  0  0  0
 28 30  1  0  0  0  0
 28 31  1  0  0  0  0
M  END
>  <VC-4>
0.026997462

>  <VC-6>
0.0083963247

>  <SPC-4>
6.4931083

>  <SwHBa>
17.237223

>  <SHCsats>
0

>  <SHother>
6.6895852

>  <SssCH2>
0.031378575

>  <ETA_Shape_Y>
0.30924001

>  <ETA_dBetaP>
-0.14516

>  <nAtomP>
15

>  <MDEC-24>
4.2924862

>  <MDEC-33>
7.9032798

>  <MDEC-34>
3.3492646

>  <MLFER_A>
0.003

>  <Classification>
0

$$$$
FC(F)(F)c1c2ncc(Cc3ccccc3)c(c2ccc1)-c1cc(ccc1)COc1c2c(ccc1)c(ccc2)CC(=O)[O-]
  MOE2013           2D

 43 48  0  0  0  0  0  0  0  0999 V2000
    0.0000    0.0000    0.0000 F   0  0  0  0  0  0  0  0  0  0  0  0
   -0.1022   -1.4965    0.0000 C   0  0  0  0  0  0  0  0  0  0  0  0
   -0.2045   -2.9930    0.0000 F   0  0  0  0  0  0  0  0  0  0  0  0
   -1.5987   -1.3943    0.0000 F   0  0  0  0  0  0  0  0  0  0  0  0
    1.3943   -1.5987    0.0000 C   0  0  0  0  0  0  0  0  0  0  0  0
    2.0540   -2.9459    0.0000 C   0  0  0  0  0  0  0  0  0  0  0  0
    1.2172   -4.1908    0.0000 N   0  0  0  0  0  0  0  0  0  0  0  0
    1.8769   -5.5379    0.0000 C   0  0  0  0  0  0  0  0  0  0  0  0
    3.3734   -5.6402    0.0000 C   0  0  0  0  0  0  0  0  0  0  0  0
    4.0332   -6.9873    0.0000 C   0  0  0  0  0  0  0  0  0  0  0  0
    3.1964   -8.2322    0.0000 C   0  0  0  0  0  0  0  0  0  0  0  0
    3.8561   -9.5793    0.0000 C   0  0  0  0  0  0  0  0  0  0  0  0
    3.0193  -10.8242    0.0000 C   0  0  0  0  0  0  0  0  0  0  0  0
    1.5228  -10.7220    0.0000 C   0  0  0  0  0  0  0  0  0  0  0  0
    0.8631   -9.3749    0.0000 C   0  0  0  0  0  0  0  0  0  0  0  0
    1.6998   -8.1300    0.0000 C   0  0  0  0  0  0  0  0  0  0  0  0
    4.2102   -4.3953    0.0000 C   0  0  0  0  0  0  0  0  0  0  0  0
    3.5505   -3.0481    0.0000 C   0  0  0  0  0  0  0  0  0  0  0  0
    4.3873   -1.8032    0.0000 C   0  0  0  0  0  0  0  0  0  0  0  0
    3.7276   -0.4561    0.0000 C   0  0  0  0  0  0  0  0  0  0  0  0
    2.2311   -0.3538    0.0000 C   0  0  0  0  0  0  0  0  0  0  0  0
    5.7067   -4.4975    0.0000 C   0  0  0  0  0  0  0  0  0  0  0  0
    6.5435   -3.2526    0.0000 C   0  0  0  0  0  0  0  0  0  0  0  0
    8.0400   -3.3548    0.0000 C   0  0  0  0  0  0  0  0  0  0  0  0
    8.6998   -4.7020    0.0000 C   0  0  0  0  0  0  0  0  0  0  0  0
    7.8630   -5.9469    0.0000 C   0  0  0  0  0  0  0  0  0  0  0  0
    6.3665   -5.8446    0.0000 C   0  0  0  0  0  0  0  0  0  0  0  0
    8.8768   -2.1099    0.0000 C   0  0  0  0  0  0  0  0  0  0  0  0
   10.3733   -2.2122    0.0000 O   0  0  0  0  0  0  0  0  0  0  0  0
   11.2101   -0.9673    0.0000 C   0  0  0  0  0  0  0  0  0  0  0  0
   12.7067   -1.0695    0.0000 C   0  0  0  0  0  0  0  0  0  0  0  0
   13.5434    0.1754    0.0000 C   0  0  0  0  0  0  0  0  0  0  0  0
   12.8837    1.5225    0.0000 C   0  0  0  0  0  0  0  0  0  0  0  0
   11.3872    1.6248    0.0000 C   0  0  0  0  0  0  0  0  0  0  0  0
   10.5504    0.3799    0.0000 C   0  0  0  0  0  0  0  0  0  0  0  0
   15.0400    0.0732    0.0000 C   0  0  0  0  0  0  0  0  0  0  0  0
   15.6997   -1.2740    0.0000 C   0  0  0  0  0  0  0  0  0  0  0  0
   14.8629   -2.5189    0.0000 C   0  0  0  0  0  0  0  0  0  0  0  0
   13.3664   -2.4166    0.0000 C   0  0  0  0  0  0  0  0  0  0  0  0
   15.8768    1.3181    0.0000 C   0  0  0  0  0  0  0  0  0  0  0  0
   17.3733    1.2158    0.0000 C   0  0  0  0  0  0  0  0  0  0  0  0
   18.2101    2.4607    0.0000 O   0  0  0  0  0  0  0  0  0  0  0  0
   18.0330   -0.1313    0.0000 O   0  5  0  0  0  0  0  0  0  0  0  0
  1  2  1  0  0  0  0
  2  3  1  0  0  0  0
  2  4  1  0  0  0  0
  2  5  1  0  0  0  0
  5  6  1  0  0  0  0
  5 21  2  3  0  0  0
  6  7  1  0  0  0  0
  6 18  2  3  0  0  0
  7  8  2  3  0  0  0
  8  9  1  0  0  0  0
  9 10  1  0  0  0  0
  9 17  2  3  0  0  0
 10 11  1  0  0  0  0
 11 12  1  0  0  0  0
 11 16  2  3  0  0  0
 12 13  2  3  0  0  0
 13 14  1  0  0  0  0
 14 15  2  3  0  0  0
 15 16  1  0  0  0  0
 17 18  1  0  0  0  0
 17 22  1  0  0  0  0
 18 19  1  0  0  0  0
 19 20  2  3  0  0  0
 20 21  1  0  0  0  0
 22 23  1  0  0  0  0
 22 27  2  3  0  0  0
 23 24  2  3  0  0  0
 24 25  1  0  0  0  0
 24 28  1  0  0  0  0
 25 26  2  3  0  0  0
 26 27  1  0  0  0  0
 28 29  1  0  0  0  0
 29 30  1  0  0  0  0
 30 31  1  0  0  0  0
 30 35  2  3  0  0  0
 31 32  1  0  0  0  0
 31 39  2  3  0  0  0
 32 33  1  0  0  0  0
 32 36  2  3  0  0  0
 33 34  2  3  0  0  0
 34 35  1  0  0  0  0
 36 37  1  0  0  0  0
 36 40  1  0  0  0  0
 37 38  2  3  0  0  0
 38 39  1  0  0  0  0
 40 41  1  0  0  0  0
 41 42  2  0  0  0  0
 41 43  1  0  0  0  0
M  CHG  1  43  -1
M  END
>  <VC-4>
0.013498731

>  <VC-6>
0.0038967479

>  <SPC-4>
6.6877308

>  <SwHBa>
39.194561

>  <SHCsats>
0

>  <SHother>
10.280521

>  <SssCH2>
0.49294218

>  <ETA_Shape_Y>
0.32087001

>  <ETA_dBetaP>
-0.017440001

>  <nAtomP>
16

>  <MDEC-24>
2.8872731

>  <MDEC-33>
16.695616

>  <MDEC-34>
2.2595589

>  <MLFER_A>
0.24600001

>  <Classification>
1

$$$$
FC(F)(F)c1c2ncc(Cc3ccccc3)c(c2ccc1)-c1cc(ccc1)CNc1cc(C)c(cc1C)CC(=O)[O-]
  MOE2013           2D

 41 45  0  0  0  0  0  0  0  0999 V2000
    0.0000    0.0000    0.0000 F   0  0  0  0  0  0  0  0  0  0  0  0
   -0.8700   -1.2219    0.0000 C   0  0  0  0  0  0  0  0  0  0  0  0
   -1.7400   -2.4439    0.0000 F   0  0  0  0  0  0  0  0  0  0  0  0
   -2.0919   -0.3520    0.0000 F   0  0  0  0  0  0  0  0  0  0  0  0
    0.3520   -2.0919    0.0000 C   0  0  0  0  0  0  0  0  0  0  0  0
    0.2095   -3.5851    0.0000 C   0  0  0  0  0  0  0  0  0  0  0  0
   -1.1549   -4.2084    0.0000 N   0  0  0  0  0  0  0  0  0  0  0  0
   -1.2973   -5.7016    0.0000 C   0  0  0  0  0  0  0  0  0  0  0  0
   -0.0754   -6.5716    0.0000 C   0  0  0  0  0  0  0  0  0  0  0  0
   -0.2179   -8.0648    0.0000 C   0  0  0  0  0  0  0  0  0  0  0  0
   -1.5822   -8.6880    0.0000 C   0  0  0  0  0  0  0  0  0  0  0  0
   -1.7247  -10.1813    0.0000 C   0  0  0  0  0  0  0  0  0  0  0  0
   -3.0891  -10.8045    0.0000 C   0  0  0  0  0  0  0  0  0  0  0  0
   -4.3110   -9.9345    0.0000 C   0  0  0  0  0  0  0  0  0  0  0  0
   -4.1686   -8.4413    0.0000 C   0  0  0  0  0  0  0  0  0  0  0  0
   -2.8042   -7.8181    0.0000 C   0  0  0  0  0  0  0  0  0  0  0  0
    1.2890   -5.9483    0.0000 C   0  0  0  0  0  0  0  0  0  0  0  0
    1.4314   -4.4551    0.0000 C   0  0  0  0  0  0  0  0  0  0  0  0
    2.7958   -3.8319    0.0000 C   0  0  0  0  0  0  0  0  0  0  0  0
    2.9383   -2.3387    0.0000 C   0  0  0  0  0  0  0  0  0  0  0  0
    1.7164   -1.4687    0.0000 C   0  0  0  0  0  0  0  0  0  0  0  0
    2.5109   -6.8183    0.0000 C   0  0  0  0  0  0  0  0  0  0  0  0
    3.8753   -6.1951    0.0000 C   0  0  0  0  0  0  0  0  0  0  0  0
    5.0973   -7.0651    0.0000 C   0  0  0  0  0  0  0  0  0  0  0  0
    4.9548   -8.5583    0.0000 C   0  0  0  0  0  0  0  0  0  0  0  0
    3.5904   -9.1815    0.0000 C   0  0  0  0  0  0  0  0  0  0  0  0
    2.3685   -8.3115    0.0000 C   0  0  0  0  0  0  0  0  0  0  0  0
    6.4617   -6.4418    0.0000 C   0  0  0  0  0  0  0  0  0  0  0  0
    7.6836   -7.3118    0.0000 N   0  0  0  0  0  0  0  0  0  0  0  0
    9.0480   -6.6886    0.0000 C   0  0  0  0  0  0  0  0  0  0  0  0
    9.1904   -5.1953    0.0000 C   0  0  0  0  0  0  0  0  0  0  0  0
   10.5548   -4.5721    0.0000 C   0  0  0  0  0  0  0  0  0  0  0  0
   10.6973   -3.0789    0.0000 C   0  0  0  0  0  0  0  0  0  0  0  0
   11.7768   -5.4421    0.0000 C   0  0  0  0  0  0  0  0  0  0  0  0
   11.6343   -6.9353    0.0000 C   0  0  0  0  0  0  0  0  0  0  0  0
   10.2699   -7.5585    0.0000 C   0  0  0  0  0  0  0  0  0  0  0  0
   10.1275   -9.0517    0.0000 C   0  0  0  0  0  0  0  0  0  0  0  0
   13.1412   -4.8188    0.0000 C   0  0  0  0  0  0  0  0  0  0  0  0
   14.3631   -5.6888    0.0000 C   0  0  0  0  0  0  0  0  0  0  0  0
   15.7275   -5.0656    0.0000 O   0  0  0  0  0  0  0  0  0  0  0  0
   14.2207   -7.1820    0.0000 O   0  5  0  0  0  0  0  0  0  0  0  0
  1  2  1  0  0  0  0
  2  3  1  0  0  0  0
  2  4  1  0  0  0  0
  2  5  1  0  0  0  0
  5  6  1  0  0  0  0
  5 21  2  3  0  0  0
  6  7  1  0  0  0  0
  6 18  2  3  0  0  0
  7  8  2  3  0  0  0
  8  9  1  0  0  0  0
  9 10  1  0  0  0  0
  9 17  2  3  0  0  0
 10 11  1  0  0  0  0
 11 12  1  0  0  0  0
 11 16  2  3  0  0  0
 12 13  2  3  0  0  0
 13 14  1  0  0  0  0
 14 15  2  3  0  0  0
 15 16  1  0  0  0  0
 17 18  1  0  0  0  0
 17 22  1  0  0  0  0
 18 19  1  0  0  0  0
 19 20  2  3  0  0  0
 20 21  1  0  0  0  0
 22 23  1  0  0  0  0
 22 27  2  3  0  0  0
 23 24  2  3  0  0  0
 24 25  1  0  0  0  0
 24 28  1  0  0  0  0
 25 26  2  3  0  0  0
 26 27  1  0  0  0  0
 28 29  1  0  0  0  0
 29 30  1  0  0  0  0
 30 31  1  0  0  0  0
 30 36  2  3  0  0  0
 31 32  2  3  0  0  0
 32 33  1  0  0  0  0
 32 34  1  0  0  0  0
 34 35  2  3  0  0  0
 34 38  1  0  0  0  0
 35 36  1  0  0  0  0
 36 37  1  0  0  0  0
 38 39  1  0  0  0  0
 39 40  2  0  0  0  0
 39 41  1  0  0  0  0
M  CHG  1  41  -1
M  END
>  <VC-4>
0.013498731

>  <VC-6>
0.0038967479

>  <SPC-4>
6.7972589

>  <SwHBa>
33.282795

>  <SHCsats>
0

>  <SHother>
7.8139639

>  <SssCH2>
0.85075766

>  <ETA_Shape_Y>
0.33636999

>  <ETA_dBetaP>
-0.054880001

>  <nAtomP>
16

>  <MDEC-24>
2.6592059

>  <MDEC-33>
16.462109

>  <MDEC-34>
2.2595589

>  <MLFER_A>
0.44

>  <Classification>
1

$$$$
Clc1cc2c3CC[C@H](Cc3[nH]c2cc1)[C@](S(=O)(=O)c1ccccc1OC)(C(OC)=O)C
  MOE2013           2D

 31 34  0  0  1  0  0  0  0  0999 V2000
   -0.0000    0.0000    0.0000 Cl  0  0  0  0  0  0  0  0  0  0  0  0
   -1.2985   -0.7510    0.0000 C   0  0  0  0  0  0  0  0  0  0  0  0
   -2.5981   -0.0019    0.0000 C   0  0  0  0  0  0  0  0  0  0  0  0
   -3.8966   -0.7529    0.0000 C   0  0  0  0  0  0  0  0  0  0  0  0
   -5.3235   -0.2904    0.0000 C   0  0  0  0  0  0  0  0  0  0  0  0
   -5.9346    1.0795    0.0000 C   0  0  0  0  0  0  0  0  0  0  0  0
   -7.4265    1.2351    0.0000 C   0  0  0  0  0  0  0  0  0  0  0  0
   -8.3073    0.0210    0.0000 C   0  0  2  0  0  0  0  0  0  0  0  0
   -7.6962   -1.3489    0.0000 C   0  0  0  0  0  0  0  0  0  0  0  0
   -6.2043   -1.5046    0.0000 C   0  0  0  0  0  0  0  0  0  0  0  0
   -5.3217   -2.7175    0.0000 N   0  0  0  0  0  0  0  0  0  0  0  0
   -3.8954   -2.2529    0.0000 C   0  0  0  0  0  0  0  0  0  0  0  0
   -2.5959   -3.0019    0.0000 C   0  0  0  0  0  0  0  0  0  0  0  0
   -1.2974   -2.2510    0.0000 C   0  0  0  0  0  0  0  0  0  0  0  0
   -9.7992    0.1767    0.0000 C   0  0  2  0  0  0  0  0  0  0  0  0
  -11.2911    0.3323    0.0000 S   0  0  0  0  0  0  0  0  0  0  0  0
  -11.4468   -1.1596    0.0000 O   0  0  0  0  0  0  0  0  0  0  0  0
  -11.1354    1.8242    0.0000 O   0  0  0  0  0  0  0  0  0  0  0  0
  -12.7830    0.4880    0.0000 C   0  0  0  0  0  0  0  0  0  0  0  0
  -13.3941    1.8579    0.0000 C   0  0  0  0  0  0  0  0  0  0  0  0
  -14.8860    2.0136    0.0000 C   0  0  0  0  0  0  0  0  0  0  0  0
  -15.7668    0.7994    0.0000 C   0  0  0  0  0  0  0  0  0  0  0  0
  -15.1557   -0.5705    0.0000 C   0  0  0  0  0  0  0  0  0  0  0  0
  -13.6638   -0.7261    0.0000 C   0  0  0  0  0  0  0  0  0  0  0  0
  -13.0526   -2.0960    0.0000 O   0  0  0  0  0  0  0  0  0  0  0  0
  -13.9334   -3.3102    0.0000 C   0  0  0  0  0  0  0  0  0  0  0  0
   -9.6435    1.6686    0.0000 C   0  0  0  0  0  0  0  0  0  0  0  0
   -8.2736    2.2797    0.0000 O   0  0  0  0  0  0  0  0  0  0  0  0
   -8.1179    3.7716    0.0000 C   0  0  0  0  0  0  0  0  0  0  0  0
  -10.8577    2.5493    0.0000 O   0  0  0  0  0  0  0  0  0  0  0  0
   -9.9549   -1.3152    0.0000 C   0  0  0  0  0  0  0  0  0  0  0  0
  1  2  1  0  0  0  0
  2  3  1  0  0  0  0
  2 14  2  3  0  0  0
  3  4  2  3  0  0  0
  4  5  1  0  0  0  0
  4 12  1  0  0  0  0
  5  6  1  0  0  0  0
  5 10  2  3  0  0  0
  6  7  1  0  0  0  0
  8  7  1  6  0  0  0
  8  9  1  0  0  0  0
  8 15  1  0  0  0  0
  9 10  1  0  0  0  0
 10 11  1  0  0  0  0
 11 12  1  0  0  0  0
 12 13  2  3  0  0  0
 13 14  1  0  0  0  0
 15 16  1  6  0  0  0
 15 27  1  0  0  0  0
 15 31  1  1  0  0  0
 16 17  2  0  0  0  0
 16 18  2  0  0  0  0
 16 19  1  0  0  0  0
 19 20  1  0  0  0  0
 19 24  2  3  0  0  0
 20 21  2  3  0  0  0
 21 22  1  0  0  0  0
 22 23  2  3  0  0  0
 23 24  1  0  0  0  0
 24 25  1  0  0  0  0
 25 26  1  0  0  0  0
 27 28  1  0  0  0  0
 27 30  2  0  0  0  0
 28 29  1  0  0  0  0
M  END
>  <VC-4>
0.11383274

>  <VC-6>
0.151867

>  <SPC-4>
8.3503885

>  <SwHBa>
18.714104

>  <SHCsats>
3.0922921

>  <SHother>
3.4264092

>  <SssCH2>
1.8454347

>  <ETA_Shape_Y>
0.29773

>  <ETA_dBetaP>
-0.16935

>  <nAtomP>
10

>  <MDEC-24>
2.5937057

>  <MDEC-33>
9.8320837

>  <MDEC-34>
3.1524324

>  <MLFER_A>
0.37400001

>  <Classification>
0

$$$$
S(=O)(=O)(C)c1cc(Oc2cc(ccc2)-c2n3c(nc2C(C)C)C(=CC=C3)C(F)(F)F)ccc1
  MOE2013           2D

 33 36  0  0  0  0  0  0  0  0999 V2000
    0.0000   -0.0000    0.0000 S   0  0  0  0  0  0  0  0  0  0  0  0
    0.7398   -1.3048    0.0000 O   0  0  0  0  0  0  0  0  0  0  0  0
   -0.7398    1.3048    0.0000 O   0  0  0  0  0  0  0  0  0  0  0  0
   -1.3048   -0.7398    0.0000 C   0  0  0  0  0  0  0  0  0  0  0  0
    1.3048    0.7398    0.0000 C   0  0  0  0  0  0  0  0  0  0  0  0
    2.5980   -0.0203    0.0000 C   0  0  0  0  0  0  0  0  0  0  0  0
    3.9028    0.7196    0.0000 C   0  0  0  0  0  0  0  0  0  0  0  0
    5.1960   -0.0405    0.0000 O   0  0  0  0  0  0  0  0  0  0  0  0
    6.5008    0.6993    0.0000 C   0  0  0  0  0  0  0  0  0  0  0  0
    7.7940   -0.0608    0.0000 C   0  0  0  0  0  0  0  0  0  0  0  0
    9.0988    0.6791    0.0000 C   0  0  0  0  0  0  0  0  0  0  0  0
    9.1105    2.1790    0.0000 C   0  0  0  0  0  0  0  0  0  0  0  0
    7.8174    2.9391    0.0000 C   0  0  0  0  0  0  0  0  0  0  0  0
    6.5125    2.1993    0.0000 C   0  0  0  0  0  0  0  0  0  0  0  0
   10.3920   -0.0810    0.0000 C   0  0  0  0  0  0  0  0  0  0  0  0
   10.5371   -1.5740    0.0000 N   0  0  0  0  0  0  0  0  0  0  0  0
   12.0019   -1.8973    0.0000 C   0  0  0  0  0  0  0  0  0  0  0  0
   12.7620   -0.6041    0.0000 N   0  0  0  0  0  0  0  0  0  0  0  0
   11.7670    0.5184    0.0000 C   0  0  0  0  0  0  0  0  0  0  0  0
   12.0903    1.9831    0.0000 C   0  0  0  0  0  0  0  0  0  0  0  0
   13.5205    2.4355    0.0000 C   0  0  0  0  0  0  0  0  0  0  0  0
   10.9835    2.9955    0.0000 C   0  0  0  0  0  0  0  0  0  0  0  0
   12.4543   -3.3274    0.0000 C   0  0  0  0  0  0  0  0  0  0  0  0
   11.4419   -4.4343    0.0000 C   0  0  0  0  0  0  0  0  0  0  0  0
    9.9772   -4.1110    0.0000 C   0  0  0  0  0  0  0  0  0  0  0  0
    9.5248   -2.6808    0.0000 C   0  0  0  0  0  0  0  0  0  0  0  0
   13.9190   -3.6507    0.0000 C   0  0  0  0  0  0  0  0  0  0  0  0
   14.2423   -2.1860    0.0000 F   0  0  0  0  0  0  0  0  0  0  0  0
   15.3838   -3.9740    0.0000 F   0  0  0  0  0  0  0  0  0  0  0  0
   13.5957   -5.1155    0.0000 F   0  0  0  0  0  0  0  0  0  0  0  0
    3.9145    2.2195    0.0000 C   0  0  0  0  0  0  0  0  0  0  0  0
    2.6214    2.9797    0.0000 C   0  0  0  0  0  0  0  0  0  0  0  0
    1.3165    2.2398    0.0000 C   0  0  0  0  0  0  0  0  0  0  0  0
  1  2  2  0  0  0  0
  1  3  2  0  0  0  0
  1  4  1  0  0  0  0
  1  5  1  0  0  0  0
  5  6  1  0  0  0  0
  5 33  2  3  0  0  0
  6  7  2  3  0  0  0
  7  8  1  0  0  0  0
  7 31  1  0  0  0  0
  8  9  1  0  0  0  0
  9 10  1  0  0  0  0
  9 14  2  3  0  0  0
 10 11  2  3  0  0  0
 11 12  1  0  0  0  0
 11 15  1  0  0  0  0
 12 13  2  3  0  0  0
 13 14  1  0  0  0  0
 15 16  1  0  0  0  0
 15 19  2  3  0  0  0
 16 17  1  0  0  0  0
 16 26  1  0  0  0  0
 17 18  2  3  0  0  0
 17 23  1  0  0  0  0
 18 19  1  0  0  0  0
 19 20  1  0  0  0  0
 20 21  1  0  0  0  0
 20 22  1  0  0  0  0
 23 24  2  3  0  0  0
 23 27  1  0  0  0  0
 24 25  1  0  0  0  0
 25 26  2  3  0  0  0
 27 28  1  0  0  0  0
 27 29  1  0  0  0  0
 27 30  1  0  0  0  0
 31 32  2  3  0  0  0
 32 33  1  0  0  0  0
M  END
>  <VC-4>
0.064497903

>  <VC-6>
0.020896472

>  <SPC-4>
6.9347615

>  <SwHBa>
19.004459

>  <SHCsats>
1.6416475

>  <SHother>
6.5549102

>  <SssCH2>
0

>  <ETA_Shape_Y>
0.31632

>  <ETA_dBetaP>
-0.11364

>  <nAtomP>
25

>  <MDEC-24>
1.7414583

>  <MDEC-33>
10.236419

>  <MDEC-34>
2.0703316

>  <MLFER_A>
0.003

>  <Classification>
1

$$$$
FC(F)(F)c1cc(ccc1)-c1oc(C)c(n1)CN(CC)c1ccc(cc1)C(O)(C(F)(F)F)C(F)(F)F
  MOE2013           2D

 36 38  0  0  1  0  0  0  0  0999 V2000
    0.0000   -0.0000    0.0000 F   0  0  0  0  0  0  0  0  0  0  0  0
    0.6020   -1.3739    0.0000 C   0  0  0  0  0  0  0  0  0  0  0  0
    1.2041   -2.7478    0.0000 F   0  0  0  0  0  0  0  0  0  0  0  0
    1.9759   -0.7718    0.0000 F   0  0  0  0  0  0  0  0  0  0  0  0
   -0.7718   -1.9759    0.0000 C   0  0  0  0  0  0  0  0  0  0  0  0
   -1.9802   -1.0871    0.0000 C   0  0  0  0  0  0  0  0  0  0  0  0
   -3.3540   -1.6892    0.0000 C   0  0  0  0  0  0  0  0  0  0  0  0
   -3.5196   -3.1800    0.0000 C   0  0  0  0  0  0  0  0  0  0  0  0
   -2.3113   -4.0688    0.0000 C   0  0  0  0  0  0  0  0  0  0  0  0
   -0.9374   -3.4668    0.0000 C   0  0  0  0  0  0  0  0  0  0  0  0
   -4.5624   -0.8004    0.0000 C   0  0  0  0  0  0  0  0  0  0  0  0
   -4.5535    0.6996    0.0000 O   0  0  0  0  0  0  0  0  0  0  0  0
   -5.9774    1.1715    0.0000 C   0  0  0  0  0  0  0  0  0  0  0  0
   -6.4325    2.6008    0.0000 C   0  0  0  0  0  0  0  0  0  0  0  0
   -6.8662   -0.0368    0.0000 C   0  0  0  0  0  0  0  0  0  0  0  0
   -5.9917   -1.2555    0.0000 N   0  0  0  0  0  0  0  0  0  0  0  0
   -8.3662   -0.0280    0.0000 C   0  0  0  0  0  0  0  0  0  0  0  0
   -9.1238   -1.3226    0.0000 N   0  0  3  0  0  0  0  0  0  0  0  0
   -8.3814   -2.6260    0.0000 C   0  0  0  0  0  0  0  0  0  0  0  0
   -9.1391   -3.9206    0.0000 C   0  0  0  0  0  0  0  0  0  0  0  0
  -10.6238   -1.3138    0.0000 C   0  0  0  0  0  0  0  0  0  0  0  0
  -11.3661   -0.0103    0.0000 C   0  0  0  0  0  0  0  0  0  0  0  0
  -12.8661   -0.0015    0.0000 C   0  0  0  0  0  0  0  0  0  0  0  0
  -13.6237   -1.2961    0.0000 C   0  0  0  0  0  0  0  0  0  0  0  0
  -12.8814   -2.5996    0.0000 C   0  0  0  0  0  0  0  0  0  0  0  0
  -11.3814   -2.6084    0.0000 C   0  0  0  0  0  0  0  0  0  0  0  0
  -15.1237   -1.2873    0.0000 C   0  0  0  0  0  0  0  0  0  0  0  0
  -16.6236   -1.2785    0.0000 O   0  0  0  0  0  0  0  0  0  0  0  0
  -15.1325   -2.7873    0.0000 C   0  0  0  0  0  0  0  0  0  0  0  0
  -13.6325   -2.7961    0.0000 F   0  0  0  0  0  0  0  0  0  0  0  0
  -16.6325   -2.7785    0.0000 F   0  0  0  0  0  0  0  0  0  0  0  0
  -15.1413   -4.2873    0.0000 F   0  0  0  0  0  0  0  0  0  0  0  0
  -15.1149    0.2127    0.0000 C   0  0  0  0  0  0  0  0  0  0  0  0
  -15.1060    1.7126    0.0000 F   0  0  0  0  0  0  0  0  0  0  0  0
  -16.6148    0.2215    0.0000 F   0  0  0  0  0  0  0  0  0  0  0  0
  -13.6149    0.2038    0.0000 F   0  0  0  0  0  0  0  0  0  0  0  0
  1  2  1  0  0  0  0
  2  3  1  0  0  0  0
  2  4  1  0  0  0  0
  2  5  1  0  0  0  0
  5  6  1  0  0  0  0
  5 10  2  3  0  0  0
  6  7  2  3  0  0  0
  7  8  1  0  0  0  0
  7 11  1  0  0  0  0
  8  9  2  3  0  0  0
  9 10  1  0  0  0  0
 11 12  1  0  0  0  0
 11 16  2  3  0  0  0
 12 13  1  0  0  0  0
 13 14  1  0  0  0  0
 13 15  2  3  0  0  0
 15 16  1  0  0  0  0
 15 17  1  0  0  0  0
 17 18  1  0  0  0  0
 18 19  1  0  0  0  0
 18 21  1  0  0  0  0
 19 20  1  0  0  0  0
 21 22  1  0  0  0  0
 21 26  2  3  0  0  0
 22 23  2  3  0  0  0
 23 24  1  0  0  0  0
 24 25  2  3  0  0  0
 24 27  1  0  0  0  0
 25 26  1  0  0  0  0
 27 28  1  0  0  0  0
 27 29  1  0  0  0  0
 27 33  1  0  0  0  0
 29 30  1  0  0  0  0
 29 31  1  0  0  0  0
 29 32  1  0  0  0  0
 33 34  1  0  0  0  0
 33 35  1  0  0  0  0
 33 36  1  0  0  0  0
M  END
>  <VC-4>
0.068447046

>  <VC-6>
0.056597397

>  <SPC-4>
10.805639

>  <SwHBa>
5.8553128

>  <SHCsats>
1.2110333

>  <SHother>
5.6728563

>  <SssCH2>
0.23640817

>  <ETA_Shape_Y>
0.25099999

>  <ETA_dBetaP>
-0.3125

>  <nAtomP>
11

>  <MDEC-24>
6.5300021

>  <MDEC-33>
5.5169764

>  <MDEC-34>
4.5568109

>  <MLFER_A>
0.85399997

>  <Classification>
0

$$$$
FC(F)(F)C(O)(C(F)(F)F)c1ccc(N(Cc2cccnc2)CC)cc1
  MOE2013           2D

 26 27  0  0  1  0  0  0  0  0999 V2000
    0.0000    0.0000    0.0000 F   0  0  0  0  0  0  0  0  0  0  0  0
    0.7573   -1.2948    0.0000 C   0  0  0  0  0  0  0  0  0  0  0  0
   -0.5376   -2.0521    0.0000 F   0  0  0  0  0  0  0  0  0  0  0  0
    2.0521   -0.5376    0.0000 F   0  0  0  0  0  0  0  0  0  0  0  0
    1.5145   -2.5897    0.0000 C   0  0  0  0  0  0  0  0  0  0  0  0
    0.2197   -3.3469    0.0000 O   0  0  0  0  0  0  0  0  0  0  0  0
    2.2718   -3.8845    0.0000 C   0  0  0  0  0  0  0  0  0  0  0  0
    3.0290   -5.1793    0.0000 F   0  0  0  0  0  0  0  0  0  0  0  0
    3.5666   -3.1272    0.0000 F   0  0  0  0  0  0  0  0  0  0  0  0
    0.9769   -4.6417    0.0000 F   0  0  0  0  0  0  0  0  0  0  0  0
    2.8093   -1.8324    0.0000 C   0  0  0  0  0  0  0  0  0  0  0  0
    2.8009   -0.3324    0.0000 C   0  0  0  0  0  0  0  0  0  0  0  0
    4.0958    0.4248    0.0000 C   0  0  0  0  0  0  0  0  0  0  0  0
    5.3990   -0.3179    0.0000 C   0  0  0  0  0  0  0  0  0  0  0  0
    6.6938    0.4393    0.0000 N   0  0  3  0  0  0  0  0  0  0  0  0
    7.9970   -0.3034    0.0000 C   0  0  0  0  0  0  0  0  0  0  0  0
    9.2918    0.4539    0.0000 C   0  0  0  0  0  0  0  0  0  0  0  0
   10.5950   -0.2889    0.0000 C   0  0  0  0  0  0  0  0  0  0  0  0
   11.8899    0.4684    0.0000 C   0  0  0  0  0  0  0  0  0  0  0  0
   11.8815    1.9684    0.0000 C   0  0  0  0  0  0  0  0  0  0  0  0
   10.5783    2.7111    0.0000 N   0  0  0  0  0  0  0  0  0  0  0  0
    9.2835    1.9539    0.0000 C   0  0  0  0  0  0  0  0  0  0  0  0
    6.6854    1.9393    0.0000 C   0  0  0  0  0  0  0  0  0  0  0  0
    5.3822    2.6821    0.0000 C   0  0  0  0  0  0  0  0  0  0  0  0
    5.4074   -1.8179    0.0000 C   0  0  0  0  0  0  0  0  0  0  0  0
    4.1125   -2.5751    0.0000 C   0  0  0  0  0  0  0  0  0  0  0  0
  1  2  1  0  0  0  0
  2  3  1  0  0  0  0
  2  4  1  0  0  0  0
  2  5  1  0  0  0  0
  5  6  1  0  0  0  0
  5  7  1  0  0  0  0
  5 11  1  0  0  0  0
  7  8  1  0  0  0  0
  7  9  1  0  0  0  0
  7 10  1  0  0  0  0
 11 12  1  0  0  0  0
 11 26  2  3  0  0  0
 12 13  2  3  0  0  0
 13 14  1  0  0  0  0
 14 15  1  0  0  0  0
 14 25  2  3  0  0  0
 15 16  1  0  0  0  0
 15 23  1  0  0  0  0
 16 17  1  0  0  0  0
 17 18  1  0  0  0  0
 17 22  2  3  0  0  0
 18 19  2  3  0  0  0
 19 20  1  0  0  0  0
 20 21  2  3  0  0  0
 21 22  1  0  0  0  0
 23 24  1  0  0  0  0
 25 26  1  0  0  0  0
M  END
>  <VC-4>
0.054948311

>  <VC-6>
0.05209782

>  <SPC-4>
7.5446978

>  <SwHBa>
10.229402

>  <SHCsats>
1.0669336

>  <SHother>
5.0349288

>  <SssCH2>
0.85074073

>  <ETA_Shape_Y>
0.16744

>  <ETA_dBetaP>
-0.28845999

>  <nAtomP>
7

>  <MDEC-24>
5.3471775

>  <MDEC-33>
0.79370052

>  <MDEC-34>
2.3471363

>  <MLFER_A>
0.85399997

>  <Classification>
0

$$$$
Clc1ccc(Oc2cc(S(=O)(=O)C(C)C)ccc2)cc1-n1c2c(nc1C)c(Cl)ccc2
  MOE2013           2D

 31 34  0  0  0  0  0  0  0  0999 V2000
    0.0000   -0.0000    0.0000 Cl  0  0  0  0  0  0  0  0  0  0  0  0
    1.2931   -0.7602    0.0000 C   0  0  0  0  0  0  0  0  0  0  0  0
    2.5980   -0.0205    0.0000 C   0  0  0  0  0  0  0  0  0  0  0  0
    3.8911   -0.7807    0.0000 C   0  0  0  0  0  0  0  0  0  0  0  0
    3.8793   -2.2807    0.0000 C   0  0  0  0  0  0  0  0  0  0  0  0
    5.1723   -3.0409    0.0000 O   0  0  0  0  0  0  0  0  0  0  0  0
    6.4772   -2.3011    0.0000 C   0  0  0  0  0  0  0  0  0  0  0  0
    7.7703   -3.0614    0.0000 C   0  0  0  0  0  0  0  0  0  0  0  0
    9.0752   -2.3216    0.0000 C   0  0  0  0  0  0  0  0  0  0  0  0
   10.3683   -3.0818    0.0000 S   0  0  0  0  0  0  0  0  0  0  0  0
   11.1285   -1.7888    0.0000 O   0  0  0  0  0  0  0  0  0  0  0  0
    9.6081   -4.3749    0.0000 O   0  0  0  0  0  0  0  0  0  0  0  0
   11.6614   -3.8421    0.0000 C   0  0  0  0  0  0  0  0  0  0  0  0
   12.9663   -3.1023    0.0000 C   0  0  0  0  0  0  0  0  0  0  0  0
   11.6496   -5.3420    0.0000 C   0  0  0  0  0  0  0  0  0  0  0  0
    9.0871   -0.8217    0.0000 C   0  0  0  0  0  0  0  0  0  0  0  0
    7.7940   -0.0615    0.0000 C   0  0  0  0  0  0  0  0  0  0  0  0
    6.4891   -0.8012    0.0000 C   0  0  0  0  0  0  0  0  0  0  0  0
    2.5743   -3.0204    0.0000 C   0  0  0  0  0  0  0  0  0  0  0  0
    1.2813   -2.2602    0.0000 C   0  0  0  0  0  0  0  0  0  0  0  0
   -0.0237   -2.9999    0.0000 N   0  0  0  0  0  0  0  0  0  0  0  0
   -1.3891   -2.3790    0.0000 C   0  0  0  0  0  0  0  0  0  0  0  0
   -2.4016   -3.4858    0.0000 C   0  0  0  0  0  0  0  0  0  0  0  0
   -1.6618   -4.7907    0.0000 N   0  0  0  0  0  0  0  0  0  0  0  0
   -0.1922   -4.4904    0.0000 C   0  0  0  0  0  0  0  0  0  0  0  0
    0.9146   -5.5029    0.0000 C   0  0  0  0  0  0  0  0  0  0  0  0
   -3.8663   -3.1624    0.0000 C   0  0  0  0  0  0  0  0  0  0  0  0
   -4.8787   -4.2691    0.0000 Cl  0  0  0  0  0  0  0  0  0  0  0  0
   -4.3186   -1.7322    0.0000 C   0  0  0  0  0  0  0  0  0  0  0  0
   -3.3061   -0.6254    0.0000 C   0  0  0  0  0  0  0  0  0  0  0  0
   -1.8414   -0.9488    0.0000 C   0  0  0  0  0  0  0  0  0  0  0  0
  1  2  1  0  0  0  0
  2  3  1  0  0  0  0
  2 20  2  3  0  0  0
  3  4  2  3  0  0  0
  4  5  1  0  0  0  0
  5  6  1  0  0  0  0
  5 19  2  3  0  0  0
  6  7  1  0  0  0  0
  7  8  1  0  0  0  0
  7 18  2  3  0  0  0
  8  9  2  3  0  0  0
  9 10  1  0  0  0  0
  9 16  1  0  0  0  0
 10 11  2  0  0  0  0
 10 12  2  0  0  0  0
 10 13  1  0  0  0  0
 13 14  1  0  0  0  0
 13 15  1  0  0  0  0
 16 17  2  3  0  0  0
 17 18  1  0  0  0  0
 19 20  1  0  0  0  0
 20 21  1  0  0  0  0
 21 22  1  0  0  0  0
 21 25  1  0  0  0  0
 22 23  1  0  0  0  0
 22 31  2  3  0  0  0
 23 24  1  0  0  0  0
 23 27  2  3  0  0  0
 24 25  2  3  0  0  0
 25 26  1  0  0  0  0
 27 28  1  0  0  0  0
 27 29  1  0  0  0  0
 29 30  2  3  0  0  0
 30 31  1  0  0  0  0
M  END
>  <VC-4>
0.029444385

>  <VC-6>
0.03925918

>  <SPC-4>
7.389194

>  <SwHBa>
27.801535

>  <SHCsats>
1.3935372

>  <SHother>
5.137969

>  <SssCH2>
0

>  <ETA_Shape_Y>
0.347

>  <ETA_dBetaP>
-0.080650002

>  <nAtomP>
25

>  <MDEC-24>
0

>  <MDEC-33>
10.945715

>  <MDEC-34>
0

>  <MLFER_A>
0.003

>  <Classification>
1

$$$$
S(=O)(=O)(C)c1cc(Oc2cc(ccc2)-c2n3c(nc2Cn2ccnc2)C(=CC=C3)C(F)(F)F)ccc1
  MOE2013           2D

 36 40  0  0  0  0  0  0  0  0999 V2000
   -0.0000    0.0000    0.0000 S   0  0  0  0  0  0  0  0  0  0  0  0
   -0.7539    1.2968    0.0000 O   0  0  0  0  0  0  0  0  0  0  0  0
    0.7539   -1.2968    0.0000 O   0  0  0  0  0  0  0  0  0  0  0  0
    1.2968    0.7539    0.0000 C   0  0  0  0  0  0  0  0  0  0  0  0
   -1.2968   -0.7539    0.0000 C   0  0  0  0  0  0  0  0  0  0  0  0
   -2.5981   -0.0078    0.0000 C   0  0  0  0  0  0  0  0  0  0  0  0
   -3.8949   -0.7617    0.0000 C   0  0  0  0  0  0  0  0  0  0  0  0
   -5.1961   -0.0155    0.0000 O   0  0  0  0  0  0  0  0  0  0  0  0
   -6.4929   -0.7694    0.0000 C   0  0  0  0  0  0  0  0  0  0  0  0
   -7.7942   -0.0233    0.0000 C   0  0  0  0  0  0  0  0  0  0  0  0
   -9.0910   -0.7772    0.0000 C   0  0  0  0  0  0  0  0  0  0  0  0
   -9.0865   -2.2772    0.0000 C   0  0  0  0  0  0  0  0  0  0  0  0
   -7.7852   -3.0233    0.0000 C   0  0  0  0  0  0  0  0  0  0  0  0
   -6.4884   -2.2694    0.0000 C   0  0  0  0  0  0  0  0  0  0  0  0
  -10.3923   -0.0311    0.0000 C   0  0  0  0  0  0  0  0  0  0  0  0
  -10.5535    1.4602    0.0000 N   0  0  0  0  0  0  0  0  0  0  0  0
  -12.0217    1.7677    0.0000 C   0  0  0  0  0  0  0  0  0  0  0  0
  -12.7678    0.4664    0.0000 N   0  0  0  0  0  0  0  0  0  0  0  0
  -11.7607   -0.6453    0.0000 C   0  0  0  0  0  0  0  0  0  0  0  0
  -12.0682   -2.1134    0.0000 C   0  0  0  0  0  0  0  0  0  0  0  0
  -13.4934   -2.5812    0.0000 N   0  0  0  0  0  0  0  0  0  0  0  0
  -13.9527   -4.0092    0.0000 C   0  0  0  0  0  0  0  0  0  0  0  0
  -15.4527   -4.0137    0.0000 C   0  0  0  0  0  0  0  0  0  0  0  0
  -15.9205   -2.5885    0.0000 N   0  0  0  0  0  0  0  0  0  0  0  0
  -14.7096   -1.7032    0.0000 C   0  0  0  0  0  0  0  0  0  0  0  0
  -12.4895    3.1929    0.0000 C   0  0  0  0  0  0  0  0  0  0  0  0
  -11.4891    4.3106    0.0000 C   0  0  0  0  0  0  0  0  0  0  0  0
  -10.0210    4.0031    0.0000 C   0  0  0  0  0  0  0  0  0  0  0  0
   -9.5532    2.5779    0.0000 C   0  0  0  0  0  0  0  0  0  0  0  0
  -13.9576    3.5004    0.0000 C   0  0  0  0  0  0  0  0  0  0  0  0
  -13.6501    4.9685    0.0000 F   0  0  0  0  0  0  0  0  0  0  0  0
  -14.2651    2.0322    0.0000 F   0  0  0  0  0  0  0  0  0  0  0  0
  -15.4258    3.8078    0.0000 F   0  0  0  0  0  0  0  0  0  0  0  0
   -3.8904   -2.2617    0.0000 C   0  0  0  0  0  0  0  0  0  0  0  0
   -2.5891   -3.0078    0.0000 C   0  0  0  0  0  0  0  0  0  0  0  0
   -1.2923   -2.2539    0.0000 C   0  0  0  0  0  0  0  0  0  0  0  0
  1  2  2  0  0  0  0
  1  3  2  0  0  0  0
  1  4  1  0  0  0  0
  1  5  1  0  0  0  0
  5  6  1  0  0  0  0
  5 36  2  3  0  0  0
  6  7  2  3  0  0  0
  7  8  1  0  0  0  0
  7 34  1  0  0  0  0
  8  9  1  0  0  0  0
  9 10  1  0  0  0  0
  9 14  2  3  0  0  0
 10 11  2  3  0  0  0
 11 12  1  0  0  0  0
 11 15  1  0  0  0  0
 12 13  2  3  0  0  0
 13 14  1  0  0  0  0
 15 16  1  0  0  0  0
 15 19  2  3  0  0  0
 16 17  1  0  0  0  0
 16 29  1  0  0  0  0
 17 18  2  3  0  0  0
 17 26  1  0  0  0  0
 18 19  1  0  0  0  0
 19 20  1  0  0  0  0
 20 21  1  0  0  0  0
 21 22  1  0  0  0  0
 21 25  1  0  0  0  0
 22 23  2  3  0  0  0
 23 24  1  0  0  0  0
 24 25  2  3  0  0  0
 26 27  2  3  0  0  0
 26 30  1  0  0  0  0
 27 28  1  0  0  0  0
 28 29  2  3  0  0  0
 30 31  1  0  0  0  0
 30 32  1  0  0  0  0
 30 33  1  0  0  0  0
 34 35  2  3  0  0  0
 35 36  1  0  0  0  0
M  END
>  <VC-4>
0.064497903

>  <VC-6>
0.020896472

>  <SPC-4>
6.804585

>  <SwHBa>
23.312664

>  <SHCsats>
0

>  <SHother>
8.7312374

>  <SssCH2>
0.20906414

>  <ETA_Shape_Y>
0.28588

>  <ETA_dBetaP>
-0.11111

>  <nAtomP>
25

>  <MDEC-24>
2.3420122

>  <MDEC-33>
7.9527645

>  <MDEC-34>
1.8727652

>  <MLFER_A>
0.003

>  <Classification>
1

$$$$
S(=O)(=O)(N(C)c1ccc(cc1)[C@@H](C(F)(F)F)c1n(ccc1)CCOCC)c1ccccc1
  MOE2013           2D

 32 34  0  0  1  0  0  0  0  0999 V2000
   -0.0000   -0.0000    0.0000 S   0  0  0  0  0  0  0  0  0  0  0  0
   -0.7506   -1.2987    0.0000 O   0  0  0  0  0  0  0  0  0  0  0  0
    0.7506    1.2987    0.0000 O   0  0  0  0  0  0  0  0  0  0  0  0
    1.2987   -0.7506    0.0000 N   0  0  3  0  0  0  0  0  0  0  0  0
    1.2979   -2.2506    0.0000 C   0  0  0  0  0  0  0  0  0  0  0  0
    2.5981   -0.0013    0.0000 C   0  0  0  0  0  0  0  0  0  0  0  0
    3.8967   -0.7519    0.0000 C   0  0  0  0  0  0  0  0  0  0  0  0
    5.1962   -0.0026    0.0000 C   0  0  0  0  0  0  0  0  0  0  0  0
    5.1969    1.4974    0.0000 C   0  0  0  0  0  0  0  0  0  0  0  0
    3.8982    2.2481    0.0000 C   0  0  0  0  0  0  0  0  0  0  0  0
    2.5988    1.4987    0.0000 C   0  0  0  0  0  0  0  0  0  0  0  0
    6.4963    2.2468    0.0000 C   0  0  1  0  0  0  0  0  0  0  0  0
    6.4971    3.7468    0.0000 C   0  0  0  0  0  0  0  0  0  0  0  0
    6.4978    5.2468    0.0000 F   0  0  0  0  0  0  0  0  0  0  0  0
    4.9971    3.7475    0.0000 F   0  0  0  0  0  0  0  0  0  0  0  0
    7.9971    3.7460    0.0000 F   0  0  0  0  0  0  0  0  0  0  0  0
    7.7950    1.4961    0.0000 C   0  0  0  0  0  0  0  0  0  0  0  0
    9.1656    2.1055    0.0000 N   0  0  0  0  0  0  0  0  0  0  0  0
   10.1687    0.9903    0.0000 C   0  0  0  0  0  0  0  0  0  0  0  0
    9.4181   -0.3084    0.0000 C   0  0  0  0  0  0  0  0  0  0  0  0
    7.9510    0.0042    0.0000 C   0  0  0  0  0  0  0  0  0  0  0  0
    9.4782    3.5726    0.0000 C   0  0  0  0  0  0  0  0  0  0  0  0
   10.9050    4.0354    0.0000 C   0  0  0  0  0  0  0  0  0  0  0  0
   11.2176    5.5025    0.0000 O   0  0  0  0  0  0  0  0  0  0  0  0
   12.6444    5.9653    0.0000 C   0  0  0  0  0  0  0  0  0  0  0  0
   12.9570    7.4324    0.0000 C   0  0  0  0  0  0  0  0  0  0  0  0
   -1.2987    0.7506    0.0000 C   0  0  0  0  0  0  0  0  0  0  0  0
   -1.2979    2.2506    0.0000 C   0  0  0  0  0  0  0  0  0  0  0  0
   -2.5966    3.0013    0.0000 C   0  0  0  0  0  0  0  0  0  0  0  0
   -3.8960    2.2519    0.0000 C   0  0  0  0  0  0  0  0  0  0  0  0
   -3.8967    0.7519    0.0000 C   0  0  0  0  0  0  0  0  0  0  0  0
   -2.5981    0.0013    0.0000 C   0  0  0  0  0  0  0  0  0  0  0  0
  1  2  2  0  0  0  0
  1  3  2  0  0  0  0
  1  4  1  0  0  0  0
  1 27  1  0  0  0  0
  4  5  1  0  0  0  0
  4  6  1  0  0  0  0
  6  7  1  0  0  0  0
  6 11  2  3  0  0  0
  7  8  2  3  0  0  0
  8  9  1  0  0  0  0
  9 10  2  3  0  0  0
 10 11  1  0  0  0  0
 12  9  1  1  0  0  0
 12 13  1  0  0  0  0
 12 17  1  0  0  0  0
 13 14  1  0  0  0  0
 13 15  1  0  0  0  0
 13 16  1  0  0  0  0
 17 18  1  0  0  0  0
 17 21  2  3  0  0  0
 18 19  1  0  0  0  0
 18 22  1  0  0  0  0
 19 20  2  3  0  0  0
 20 21  1  0  0  0  0
 22 23  1  0  0  0  0
 23 24  1  0  0  0  0
 24 25  1  0  0  0  0
 25 26  1  0  0  0  0
 27 28  1  0  0  0  0
 27 32  2  3  0  0  0
 28 29  2  3  0  0  0
 29 30  1  0  0  0  0
 30 31  2  3  0  0  0
 31 32  1  0  0  0  0
M  END
>  <VC-4>
0.038394514

>  <VC-6>
0.022903018

>  <SPC-4>
6.4365516

>  <SwHBa>
19.034058

>  <SHCsats>
3.5567329

>  <SHother>
6.6860676

>  <SssCH2>
1.1144286

>  <ETA_Shape_Y>
0.22014

>  <ETA_dBetaP>
-0.17969

>  <nAtomP>
16

>  <MDEC-24>
2.7993076

>  <MDEC-33>
3.1026716

>  <MDEC-34>
1.8119491

>  <MLFER_A>
0.022

>  <Classification>
0

$$$$
FC(F)(F)c1c2ncc(C(=O)c3ccccc3)c(c2ccc1)-c1cc(OCc2ccc(cc2)C(=O)[O-])ccc1
  MOE2013           2D

 39 43  0  0  0  0  0  0  0  0999 V2000
    0.0000    0.0000    0.0000 F   0  0  0  0  0  0  0  0  0  0  0  0
    0.7444    1.3022    0.0000 C   0  0  0  0  0  0  0  0  0  0  0  0
   -0.5578    2.0467    0.0000 F   0  0  0  0  0  0  0  0  0  0  0  0
    2.0467    0.5578    0.0000 F   0  0  0  0  0  0  0  0  0  0  0  0
    1.4889    2.6045    0.0000 C   0  0  0  0  0  0  0  0  0  0  0  0
    0.7333    3.9003    0.0000 C   0  0  0  0  0  0  0  0  0  0  0  0
   -0.7667    3.8939    0.0000 N   0  0  0  0  0  0  0  0  0  0  0  0
   -1.5222    5.1897    0.0000 C   0  0  0  0  0  0  0  0  0  0  0  0
   -0.7778    6.4919    0.0000 C   0  0  0  0  0  0  0  0  0  0  0  0
   -1.5334    7.7877    0.0000 C   0  0  0  0  0  0  0  0  0  0  0  0
   -0.7889    9.0900    0.0000 O   0  0  0  0  0  0  0  0  0  0  0  0
   -3.0333    7.7813    0.0000 C   0  0  0  0  0  0  0  0  0  0  0  0
   -3.7778    6.4791    0.0000 C   0  0  0  0  0  0  0  0  0  0  0  0
   -5.2778    6.4727    0.0000 C   0  0  0  0  0  0  0  0  0  0  0  0
   -6.0333    7.7685    0.0000 C   0  0  0  0  0  0  0  0  0  0  0  0
   -5.2889    9.0707    0.0000 C   0  0  0  0  0  0  0  0  0  0  0  0
   -3.7889    9.0771    0.0000 C   0  0  0  0  0  0  0  0  0  0  0  0
    0.7222    6.4983    0.0000 C   0  0  0  0  0  0  0  0  0  0  0  0
    1.4777    5.2025    0.0000 C   0  0  0  0  0  0  0  0  0  0  0  0
    2.9777    5.2089    0.0000 C   0  0  0  0  0  0  0  0  0  0  0  0
    3.7333    3.9131    0.0000 C   0  0  0  0  0  0  0  0  0  0  0  0
    2.9888    2.6109    0.0000 C   0  0  0  0  0  0  0  0  0  0  0  0
    1.4666    7.8006    0.0000 C   0  0  0  0  0  0  0  0  0  0  0  0
    2.9666    7.8070    0.0000 C   0  0  0  0  0  0  0  0  0  0  0  0
    3.7110    9.1092    0.0000 C   0  0  0  0  0  0  0  0  0  0  0  0
    5.2110    9.1157    0.0000 O   0  0  0  0  0  0  0  0  0  0  0  0
    5.9555   10.4179    0.0000 C   0  0  0  0  0  0  0  0  0  0  0  0
    7.4554   10.4243    0.0000 C   0  0  0  0  0  0  0  0  0  0  0  0
    8.2110    9.1285    0.0000 C   0  0  0  0  0  0  0  0  0  0  0  0
    9.7110    9.1349    0.0000 C   0  0  0  0  0  0  0  0  0  0  0  0
   10.4554   10.4372    0.0000 C   0  0  0  0  0  0  0  0  0  0  0  0
    9.6999   11.7330    0.0000 C   0  0  0  0  0  0  0  0  0  0  0  0
    8.1999   11.7266    0.0000 C   0  0  0  0  0  0  0  0  0  0  0  0
   11.9554   10.4436    0.0000 C   0  0  0  0  0  0  0  0  0  0  0  0
   12.7110    9.1478    0.0000 O   0  0  0  0  0  0  0  0  0  0  0  0
   12.6998   11.7458    0.0000 O   0  5  0  0  0  0  0  0  0  0  0  0
    2.9555   10.4051    0.0000 C   0  0  0  0  0  0  0  0  0  0  0  0
    1.4555   10.3986    0.0000 C   0  0  0  0  0  0  0  0  0  0  0  0
    0.7111    9.0964    0.0000 C   0  0  0  0  0  0  0  0  0  0  0  0
  1  2  1  0  0  0  0
  2  3  1  0  0  0  0
  2  4  1  0  0  0  0
  2  5  1  0  0  0  0
  5  6  1  0  0  0  0
  5 22  2  3  0  0  0
  6  7  1  0  0  0  0
  6 19  2  3  0  0  0
  7  8  2  3  0  0  0
  8  9  1  0  0  0  0
  9 10  1  0  0  0  0
  9 18  2  3  0  0  0
 10 11  2  0  0  0  0
 10 12  1  0  0  0  0
 12 13  1  0  0  0  0
 12 17  2  3  0  0  0
 13 14  2  3  0  0  0
 14 15  1  0  0  0  0
 15 16  2  3  0  0  0
 16 17  1  0  0  0  0
 18 19  1  0  0  0  0
 18 23  1  0  0  0  0
 19 20  1  0  0  0  0
 20 21  2  3  0  0  0
 21 22  1  0  0  0  0
 23 24  1  0  0  0  0
 23 39  2  3  0  0  0
 24 25  2  3  0  0  0
 25 26  1  0  0  0  0
 25 37  1  0  0  0  0
 26 27  1  0  0  0  0
 27 28  1  0  0  0  0
 28 29  1  0  0  0  0
 28 33  2  3  0  0  0
 29 30  2  3  0  0  0
 30 31  1  0  0  0  0
 31 32  2  3  0  0  0
 31 34  1  0  0  0  0
 32 33  1  0  0  0  0
 34 35  2  0  0  0  0
 34 36  1  0  0  0  0
 37 38  2  3  0  0  0
 38 39  1  0  0  0  0
M  CHG  1  36  -1
M  END
>  <VC-4>
0.013498731

>  <VC-6>
0.0038967479

>  <SPC-4>
6.7791085

>  <SwHBa>
25.951525

>  <SHCsats>
0

>  <SHother>
10.277186

>  <SssCH2>
0.11299484

>  <ETA_Shape_Y>
0.33166999

>  <ETA_dBetaP>
0

>  <nAtomP>
25

>  <MDEC-24>
2.5763502

>  <MDEC-33>
15.420106

>  <MDEC-34>
2.3458509

>  <MLFER_A>
0.24600001

>  <Classification>
0

$$$$
S(=O)(=O)(C)c1cc(Oc2cc(ccc2)-c2c3c(ncc2C)c(ccc3)C(F)(F)F)ccc1
  MOE2013           2D

 32 35  0  0  0  0  0  0  0  0999 V2000
   -0.0000   -0.0000    0.0000 S   0  0  0  0  0  0  0  0  0  0  0  0
    0.7508    1.2986    0.0000 O   0  0  0  0  0  0  0  0  0  0  0  0
   -0.7508   -1.2986    0.0000 O   0  0  0  0  0  0  0  0  0  0  0  0
    1.2986   -0.7508    0.0000 C   0  0  0  0  0  0  0  0  0  0  0  0
   -1.2986    0.7508    0.0000 C   0  0  0  0  0  0  0  0  0  0  0  0
   -2.5981    0.0016    0.0000 C   0  0  0  0  0  0  0  0  0  0  0  0
   -3.8966    0.7525    0.0000 C   0  0  0  0  0  0  0  0  0  0  0  0
   -5.1962    0.0033    0.0000 O   0  0  0  0  0  0  0  0  0  0  0  0
   -6.4947    0.7541    0.0000 C   0  0  0  0  0  0  0  0  0  0  0  0
   -7.7942    0.0049    0.0000 C   0  0  0  0  0  0  0  0  0  0  0  0
   -9.0928    0.7557    0.0000 C   0  0  0  0  0  0  0  0  0  0  0  0
   -9.0918    2.2557    0.0000 C   0  0  0  0  0  0  0  0  0  0  0  0
   -7.7923    3.0049    0.0000 C   0  0  0  0  0  0  0  0  0  0  0  0
   -6.4938    2.2541    0.0000 C   0  0  0  0  0  0  0  0  0  0  0  0
  -10.3923    0.0066    0.0000 C   0  0  0  0  0  0  0  0  0  0  0  0
  -11.6909    0.7574    0.0000 C   0  0  0  0  0  0  0  0  0  0  0  0
  -12.9904    0.0082    0.0000 C   0  0  0  0  0  0  0  0  0  0  0  0
  -12.9913   -1.4918    0.0000 N   0  0  0  0  0  0  0  0  0  0  0  0
  -11.6928   -2.2426    0.0000 C   0  0  0  0  0  0  0  0  0  0  0  0
  -10.3933   -1.4934    0.0000 C   0  0  0  0  0  0  0  0  0  0  0  0
   -9.0947   -2.2443    0.0000 C   0  0  0  0  0  0  0  0  0  0  0  0
  -14.2889    0.7590    0.0000 C   0  0  0  0  0  0  0  0  0  0  0  0
  -14.2880    2.2590    0.0000 C   0  0  0  0  0  0  0  0  0  0  0  0
  -12.9885    3.0082    0.0000 C   0  0  0  0  0  0  0  0  0  0  0  0
  -11.6899    2.2574    0.0000 C   0  0  0  0  0  0  0  0  0  0  0  0
  -15.5885    0.0099    0.0000 C   0  0  0  0  0  0  0  0  0  0  0  0
  -16.3376    1.3094    0.0000 F   0  0  0  0  0  0  0  0  0  0  0  0
  -16.8880   -0.7393    0.0000 F   0  0  0  0  0  0  0  0  0  0  0  0
  -14.8393   -1.2897    0.0000 F   0  0  0  0  0  0  0  0  0  0  0  0
   -3.8957    2.2525    0.0000 C   0  0  0  0  0  0  0  0  0  0  0  0
   -2.5962    3.0016    0.0000 C   0  0  0  0  0  0  0  0  0  0  0  0
   -1.2976    2.2508    0.0000 C   0  0  0  0  0  0  0  0  0  0  0  0
  1  2  2  0  0  0  0
  1  3  2  0  0  0  0
  1  4  1  0  0  0  0
  1  5  1  0  0  0  0
  5  6  1  0  0  0  0
  5 32  2  3  0  0  0
  6  7  2  3  0  0  0
  7  8  1  0  0  0  0
  7 30  1  0  0  0  0
  8  9  1  0  0  0  0
  9 10  1  0  0  0  0
  9 14  2  3  0  0  0
 10 11  2  3  0  0  0
 11 12  1  0  0  0  0
 11 15  1  0  0  0  0
 12 13  2  3  0  0  0
 13 14  1  0  0  0  0
 15 16  1  0  0  0  0
 15 20  2  3  0  0  0
 16 17  1  0  0  0  0
 16 25  2  3  0  0  0
 17 18  1  0  0  0  0
 17 22  2  3  0  0  0
 18 19  2  3  0  0  0
 19 20  1  0  0  0  0
 20 21  1  0  0  0  0
 22 23  1  0  0  0  0
 22 26  1  0  0  0  0
 23 24  2  3  0  0  0
 24 25  1  0  0  0  0
 26 27  1  0  0  0  0
 26 28  1  0  0  0  0
 26 29  1  0  0  0  0
 30 31  2  3  0  0  0
 31 32  1  0  0  0  0
M  END
>  <VC-4>
0.064497903

>  <VC-6>
0.020896472

>  <SPC-4>
6.502192

>  <SwHBa>
21.273758

>  <SHCsats>
0

>  <SHother>
7.1285014

>  <SssCH2>
0

>  <ETA_Shape_Y>
0.29820001

>  <ETA_dBetaP>
-0.03125

>  <nAtomP>
26

>  <MDEC-24>
1.9734976

>  <MDEC-33>
10.820949

>  <MDEC-34>
2.1375782

>  <MLFER_A>
0.003

>  <Classification>
0

$$$$
FC(F)(F)c1c2ncc(C(=O)c3ccccc3)c(c2ccc1)-c1ccc(OCc2ccc(cc2)C(=O)[O-])cc1
  MOE2013           2D

 39 43  0  0  0  0  0  0  0  0999 V2000
    0.0000   -0.0000    0.0000 F   0  0  0  0  0  0  0  0  0  0  0  0
    0.0197   -1.4999    0.0000 C   0  0  0  0  0  0  0  0  0  0  0  0
   -1.4801   -1.5196    0.0000 F   0  0  0  0  0  0  0  0  0  0  0  0
    0.0395   -2.9997    0.0000 F   0  0  0  0  0  0  0  0  0  0  0  0
    1.5196   -1.4801    0.0000 C   0  0  0  0  0  0  0  0  0  0  0  0
    2.2525   -0.1713    0.0000 C   0  0  0  0  0  0  0  0  0  0  0  0
    1.4854    1.1177    0.0000 N   0  0  0  0  0  0  0  0  0  0  0  0
    2.2182    2.4265    0.0000 C   0  0  0  0  0  0  0  0  0  0  0  0
    3.7181    2.4463    0.0000 C   0  0  0  0  0  0  0  0  0  0  0  0
    4.4509    3.7551    0.0000 C   0  0  0  0  0  0  0  0  0  0  0  0
    5.9508    3.7748    0.0000 O   0  0  0  0  0  0  0  0  0  0  0  0
    3.6839    5.0441    0.0000 C   0  0  0  0  0  0  0  0  0  0  0  0
    2.1840    5.0244    0.0000 C   0  0  0  0  0  0  0  0  0  0  0  0
    1.4170    6.3134    0.0000 C   0  0  0  0  0  0  0  0  0  0  0  0
    2.1498    7.6222    0.0000 C   0  0  0  0  0  0  0  0  0  0  0  0
    3.6497    7.6420    0.0000 C   0  0  0  0  0  0  0  0  0  0  0  0
    4.4167    6.3529    0.0000 C   0  0  0  0  0  0  0  0  0  0  0  0
    4.4852    1.1572    0.0000 C   0  0  0  0  0  0  0  0  0  0  0  0
    3.7523   -0.1516    0.0000 C   0  0  0  0  0  0  0  0  0  0  0  0
    4.5194   -1.4406    0.0000 C   0  0  0  0  0  0  0  0  0  0  0  0
    3.7865   -2.7494    0.0000 C   0  0  0  0  0  0  0  0  0  0  0  0
    2.2867   -2.7692    0.0000 C   0  0  0  0  0  0  0  0  0  0  0  0
    5.9850    1.1770    0.0000 C   0  0  0  0  0  0  0  0  0  0  0  0
    6.7179    2.4858    0.0000 C   0  0  0  0  0  0  0  0  0  0  0  0
    8.2177    2.5055    0.0000 C   0  0  0  0  0  0  0  0  0  0  0  0
    8.9848    1.2165    0.0000 C   0  0  0  0  0  0  0  0  0  0  0  0
   10.4846    1.2362    0.0000 O   0  0  0  0  0  0  0  0  0  0  0  0
   11.2517   -0.0528    0.0000 C   0  0  0  0  0  0  0  0  0  0  0  0
   12.7515   -0.0331    0.0000 C   0  0  0  0  0  0  0  0  0  0  0  0
   13.5186   -1.3221    0.0000 C   0  0  0  0  0  0  0  0  0  0  0  0
   15.0184   -1.3024    0.0000 C   0  0  0  0  0  0  0  0  0  0  0  0
   15.7513    0.0064    0.0000 C   0  0  0  0  0  0  0  0  0  0  0  0
   14.9842    1.2955    0.0000 C   0  0  0  0  0  0  0  0  0  0  0  0
   13.4844    1.2757    0.0000 C   0  0  0  0  0  0  0  0  0  0  0  0
   17.2512    0.0262    0.0000 C   0  0  0  0  0  0  0  0  0  0  0  0
   17.9840    1.3350    0.0000 O   0  0  0  0  0  0  0  0  0  0  0  0
   18.0182   -1.2629    0.0000 O   0  5  0  0  0  0  0  0  0  0  0  0
    8.2519   -0.0923    0.0000 C   0  0  0  0  0  0  0  0  0  0  0  0
    6.7521   -0.1121    0.0000 C   0  0  0  0  0  0  0  0  0  0  0  0
  1  2  1  0  0  0  0
  2  3  1  0  0  0  0
  2  4  1  0  0  0  0
  2  5  1  0  0  0  0
  5  6  1  0  0  0  0
  5 22  2  3  0  0  0
  6  7  1  0  0  0  0
  6 19  2  3  0  0  0
  7  8  2  3  0  0  0
  8  9  1  0  0  0  0
  9 10  1  0  0  0  0
  9 18  2  3  0  0  0
 10 11  2  0  0  0  0
 10 12  1  0  0  0  0
 12 13  1  0  0  0  0
 12 17  2  3  0  0  0
 13 14  2  3  0  0  0
 14 15  1  0  0  0  0
 15 16  2  3  0  0  0
 16 17  1  0  0  0  0
 18 19  1  0  0  0  0
 18 23  1  0  0  0  0
 19 20  1  0  0  0  0
 20 21  2  3  0  0  0
 21 22  1  0  0  0  0
 23 24  1  0  0  0  0
 23 39  2  3  0  0  0
 24 25  2  3  0  0  0
 25 26  1  0  0  0  0
 26 27  1  0  0  0  0
 26 38  2  3  0  0  0
 27 28  1  0  0  0  0
 28 29  1  0  0  0  0
 29 30  1  0  0  0  0
 29 34  2  3  0  0  0
 30 31  2  3  0  0  0
 31 32  1  0  0  0  0
 32 33  2  3  0  0  0
 32 35  1  0  0  0  0
 33 34  1  0  0  0  0
 35 36  2  0  0  0  0
 35 37  1  0  0  0  0
 38 39  1  0  0  0  0
M  CHG  1  37  -1
M  END
>  <VC-4>
0.013498731

>  <VC-6>
0.0038967479

>  <SPC-4>
6.8272214

>  <SwHBa>
26.306416

>  <SHCsats>
0

>  <SHother>
10.269059

>  <SssCH2>
0.16423377

>  <ETA_Shape_Y>
0.33166999

>  <ETA_dBetaP>
0

>  <nAtomP>
25

>  <MDEC-24>
2.5329311

>  <MDEC-33>
14.449008

>  <MDEC-34>
2.2742562

>  <MLFER_A>
0.24600001

>  <Classification>
0

$$$$
S(=O)(=O)(C(C)C)c1cc(Oc2cc(ccc2)-c2n3c(nc2C)C(=CC=C3)C(F)(F)F)ccc1
  MOE2013           2D

 33 36  0  0  0  0  0  0  0  0999 V2000
    0.0000    0.0000    0.0000 S   0  0  0  0  0  0  0  0  0  0  0  0
   -0.7483   -1.3000    0.0000 O   0  0  0  0  0  0  0  0  0  0  0  0
    0.7483    1.3000    0.0000 O   0  0  0  0  0  0  0  0  0  0  0  0
    1.3000   -0.7483    0.0000 C   0  0  0  0  0  0  0  0  0  0  0  0
    1.3020   -2.2483    0.0000 C   0  0  0  0  0  0  0  0  0  0  0  0
    2.5981    0.0034    0.0000 C   0  0  0  0  0  0  0  0  0  0  0  0
   -1.3000    0.7483    0.0000 C   0  0  0  0  0  0  0  0  0  0  0  0
   -2.5981   -0.0034    0.0000 C   0  0  0  0  0  0  0  0  0  0  0  0
   -3.8981    0.7450    0.0000 C   0  0  0  0  0  0  0  0  0  0  0  0
   -5.1961   -0.0067    0.0000 O   0  0  0  0  0  0  0  0  0  0  0  0
   -6.4962    0.7416    0.0000 C   0  0  0  0  0  0  0  0  0  0  0  0
   -7.7942   -0.0101    0.0000 C   0  0  0  0  0  0  0  0  0  0  0  0
   -9.0942    0.7382    0.0000 C   0  0  0  0  0  0  0  0  0  0  0  0
   -9.0962    2.2382    0.0000 C   0  0  0  0  0  0  0  0  0  0  0  0
   -7.7981    2.9899    0.0000 C   0  0  0  0  0  0  0  0  0  0  0  0
   -6.4981    2.2416    0.0000 C   0  0  0  0  0  0  0  0  0  0  0  0
  -10.3923   -0.0135    0.0000 C   0  0  0  0  0  0  0  0  0  0  0  0
  -11.7634    0.5949    0.0000 N   0  0  0  0  0  0  0  0  0  0  0  0
  -12.7657   -0.5211    0.0000 C   0  0  0  0  0  0  0  0  0  0  0  0
  -12.0140   -1.8192    0.0000 N   0  0  0  0  0  0  0  0  0  0  0  0
  -10.5472   -1.5054    0.0000 C   0  0  0  0  0  0  0  0  0  0  0  0
   -9.4311   -2.5077    0.0000 C   0  0  0  0  0  0  0  0  0  0  0  0
  -14.2333   -0.2112    0.0000 C   0  0  0  0  0  0  0  0  0  0  0  0
  -14.6987    1.2148    0.0000 C   0  0  0  0  0  0  0  0  0  0  0  0
  -13.6964    2.3308    0.0000 C   0  0  0  0  0  0  0  0  0  0  0  0
  -12.2288    2.0209    0.0000 C   0  0  0  0  0  0  0  0  0  0  0  0
  -15.2355   -1.3272    0.0000 C   0  0  0  0  0  0  0  0  0  0  0  0
  -16.3515   -0.3249    0.0000 F   0  0  0  0  0  0  0  0  0  0  0  0
  -16.2378   -2.4432    0.0000 F   0  0  0  0  0  0  0  0  0  0  0  0
  -14.1195   -2.3294    0.0000 F   0  0  0  0  0  0  0  0  0  0  0  0
   -3.9000    2.2450    0.0000 C   0  0  0  0  0  0  0  0  0  0  0  0
   -2.6020    2.9966    0.0000 C   0  0  0  0  0  0  0  0  0  0  0  0
   -1.3020    2.2483    0.0000 C   0  0  0  0  0  0  0  0  0  0  0  0
  1  2  2  0  0  0  0
  1  3  2  0  0  0  0
  1  4  1  0  0  0  0
  1  7  1  0  0  0  0
  4  5  1  0  0  0  0
  4  6  1  0  0  0  0
  7  8  1  0  0  0  0
  7 33  2  3  0  0  0
  8  9  2  3  0  0  0
  9 10  1  0  0  0  0
  9 31  1  0  0  0  0
 10 11  1  0  0  0  0
 11 12  1  0  0  0  0
 11 16  2  3  0  0  0
 12 13  2  3  0  0  0
 13 14  1  0  0  0  0
 13 17  1  0  0  0  0
 14 15  2  3  0  0  0
 15 16  1  0  0  0  0
 17 18  1  0  0  0  0
 17 21  2  3  0  0  0
 18 19  1  0  0  0  0
 18 26  1  0  0  0  0
 19 20  2  3  0  0  0
 19 23  1  0  0  0  0
 20 21  1  0  0  0  0
 21 22  1  0  0  0  0
 23 24  2  3  0  0  0
 23 27  1  0  0  0  0
 24 25  1  0  0  0  0
 25 26  2  3  0  0  0
 27 28  1  0  0  0  0
 27 29  1  0  0  0  0
 27 30  1  0  0  0  0
 31 32  2  3  0  0  0
 32 33  1  0  0  0  0
M  END
>  <VC-4>
0.042943116

>  <VC-6>
0.043155927

>  <SPC-4>
8.0358877

>  <SwHBa>
18.880054

>  <SHCsats>
1.4484919

>  <SHother>
6.5593038

>  <SssCH2>
0

>  <ETA_Shape_Y>
0.31632

>  <ETA_dBetaP>
-0.11364

>  <nAtomP>
25

>  <MDEC-24>
1.7414583

>  <MDEC-33>
8.8340902

>  <MDEC-34>
1.8617947

>  <MLFER_A>
0.003

>  <Classification>
1

$$$$
O[C@H]1CC[C@]2([C@@H](CC=C3C2=CC[C@@]2(C)[C@@]3(C)[C@@H](O)C[C@@H]2[C@@H](CC\C=C(\C)/C)C)C1(C)C)C
  MOE2013           2D

 32 35  0  0  1  0  0  0  0  0999 V2000
    0.0000    0.0000    0.0000 O   0  0  0  0  0  0  0  0  0  0  0  0
    1.4999    0.0129    0.0000 C   0  0  1  0  0  0  0  0  0  0  0  0
    2.2388    1.3183    0.0000 C   0  0  0  0  0  0  0  0  0  0  0  0
    3.7387    1.3311    0.0000 C   0  0  0  0  0  0  0  0  0  0  0  0
    4.4998    0.0386    0.0000 C   0  0  1  0  0  0  0  0  0  0  0  0
    3.7610   -1.2669    0.0000 C   0  0  1  0  0  0  0  0  0  0  0  0
    4.5221   -2.5594    0.0000 C   0  0  0  0  0  0  0  0  0  0  0  0
    6.0220   -2.5466    0.0000 C   0  0  0  0  0  0  0  0  0  0  0  0
    6.7609   -1.2411    0.0000 C   0  0  0  0  0  0  0  0  0  0  0  0
    5.9998    0.0514    0.0000 C   0  0  0  0  0  0  0  0  0  0  0  0
    6.7386    1.3568    0.0000 C   0  0  0  0  0  0  0  0  0  0  0  0
    8.2386    1.3697    0.0000 C   0  0  0  0  0  0  0  0  0  0  0  0
    8.9997    0.0771    0.0000 C   0  0  1  0  0  0  0  0  0  0  0  0
    9.9130    1.2670    0.0000 C   0  0  0  0  0  0  0  0  0  0  0  0
    8.2608   -1.2283    0.0000 C   0  0  2  0  0  0  0  0  0  0  0  0
    7.6866   -2.6140    0.0000 C   0  0  0  0  0  0  0  0  0  0  0  0
    9.2740   -2.3344    0.0000 C   0  0  1  0  0  0  0  0  0  0  0  0
    8.9748   -3.8042    0.0000 O   0  0  0  0  0  0  0  0  0  0  0  0
   10.6391   -1.7125    0.0000 C   0  0  0  0  0  0  0  0  0  0  0  0
   10.4695   -0.2221    0.0000 C   0  0  2  0  0  0  0  0  0  0  0  0
   11.5756    0.7911    0.0000 C   0  0  1  0  0  0  0  0  0  0  0  0
   13.0061    0.3398    0.0000 C   0  0  0  0  0  0  0  0  0  0  0  0
   14.1122    1.3530    0.0000 C   0  0  0  0  0  0  0  0  0  0  0  0
   15.5427    0.9017    0.0000 C   0  0  0  0  0  0  0  0  0  0  0  0
   16.6487    1.9149    0.0000 C   0  0  0  0  0  0  0  0  0  0  0  0
   18.0792    1.4636    0.0000 C   0  0  0  0  0  0  0  0  0  0  0  0
   16.3243    3.3794    0.0000 C   0  0  0  0  0  0  0  0  0  0  0  0
   11.2512    2.2556    0.0000 C   0  0  0  0  0  0  0  0  0  0  0  0
    2.2611   -1.2797    0.0000 C   0  0  0  0  0  0  0  0  0  0  0  0
    2.3132   -2.7788    0.0000 C   0  0  0  0  0  0  0  0  0  0  0  0
    1.0029   -2.0965    0.0000 C   0  0  0  0  0  0  0  0  0  0  0  0
    3.0013   -0.0266    0.0000 C   0  0  0  0  0  0  0  0  0  0  0  0
  2  1  1  1  0  0  0
  2  3  1  0  0  0  0
  2 29  1  0  0  0  0
  3  4  1  0  0  0  0
  4  5  1  0  0  0  0
  5  6  1  0  0  0  0
  5 10  1  0  0  0  0
  5 32  1  1  0  0  0
  6  7  1  1  0  0  0
  6 29  1  0  0  0  0
  7  8  1  0  0  0  0
  8  9  2  3  0  0  0
  9 10  1  0  0  0  0
  9 15  1  0  0  0  0
 10 11  2  3  0  0  0
 11 12  1  0  0  0  0
 12 13  1  0  0  0  0
 13 14  1  1  0  0  0
 13 15  1  0  0  0  0
 13 20  1  0  0  0  0
 15 16  1  6  0  0  0
 15 17  1  0  0  0  0
 17 18  1  6  0  0  0
 17 19  1  0  0  0  0
 20 19  1  1  0  0  0
 20 21  1  0  0  0  0
 21 22  1  0  0  0  0
 21 28  1  6  0  0  0
 22 23  1  0  0  0  0
 23 24  1  0  0  0  0
 24 25  2  0  0  0  0
 25 26  1  0  0  0  0
 25 27  1  0  0  0  0
 29 30  1  0  0  0  0
 29 31  1  0  0  0  0
M  END
>  <VC-4>
0.44295961

>  <VC-6>
0.52407902

>  <SPC-4>
11.278808

>  <SwHBa>
11.775505

>  <SHCsats>
6.4549007

>  <SHother>
0.56880617

>  <SssCH2>
7.2876859

>  <ETA_Shape_Y>
0.25532001

>  <ETA_dBetaP>
-0.4375

>  <nAtomP>
4

>  <MDEC-24>
11.188931

>  <MDEC-33>
6.6397529

>  <MDEC-34>
10.4531

>  <MLFER_A>
0.69300002

>  <Classification>
0

$$$$
Oc1cc2c(CC[C@H]3[C@](CCC[C@]23C)(C(OCCC=C)=O)C)cc1
  MOE2013           2D

 24 26  0  0  1  0  0  0  0  0999 V2000
    0.0000    0.0000    0.0000 O   0  0  0  0  0  0  0  0  0  0  0  0
    1.2965   -0.7545    0.0000 C   0  0  0  0  0  0  0  0  0  0  0  0
    2.5981   -0.0089    0.0000 C   0  0  0  0  0  0  0  0  0  0  0  0
    3.8945   -0.7634    0.0000 C   0  0  0  0  0  0  0  0  0  0  0  0
    3.8894   -2.2634    0.0000 C   0  0  0  0  0  0  0  0  0  0  0  0
    5.1858   -3.0179    0.0000 C   0  0  0  0  0  0  0  0  0  0  0  0
    6.4874   -2.2723    0.0000 C   0  0  0  0  0  0  0  0  0  0  0  0
    6.4926   -0.7723    0.0000 C   0  0  1  0  0  0  0  0  0  0  0  0
    7.7942   -0.0268    0.0000 C   0  0  2  0  0  0  0  0  0  0  0  0
    7.7993    1.4732    0.0000 C   0  0  0  0  0  0  0  0  0  0  0  0
    6.5029    2.2276    0.0000 C   0  0  0  0  0  0  0  0  0  0  0  0
    5.2013    1.4821    0.0000 C   0  0  0  0  0  0  0  0  0  0  0  0
    5.1961   -0.0179    0.0000 C   0  0  2  0  0  0  0  0  0  0  0  0
    3.8997    0.7366    0.0000 C   0  0  0  0  0  0  0  0  0  0  0  0
    9.2942   -0.0320    0.0000 C   0  0  0  0  0  0  0  0  0  0  0  0
   10.0486    1.2645    0.0000 O   0  0  0  0  0  0  0  0  0  0  0  0
   11.5486    1.2593    0.0000 C   0  0  0  0  0  0  0  0  0  0  0  0
   12.3031    2.5558    0.0000 C   0  0  0  0  0  0  0  0  0  0  0  0
   13.8031    2.5506    0.0000 C   0  0  0  0  0  0  0  0  0  0  0  0
   14.5575    3.8471    0.0000 C   0  0  0  0  0  0  0  0  0  0  0  0
   10.0397   -1.3336    0.0000 O   0  0  0  0  0  0  0  0  0  0  0  0
    8.5397   -1.3284    0.0000 C   0  0  0  0  0  0  0  0  0  0  0  0
    2.5877   -3.0089    0.0000 C   0  0  0  0  0  0  0  0  0  0  0  0
    1.2913   -2.2545    0.0000 C   0  0  0  0  0  0  0  0  0  0  0  0
  1  2  1  0  0  0  0
  2  3  1  0  0  0  0
  2 24  2  3  0  0  0
  3  4  2  3  0  0  0
  4  5  1  0  0  0  0
  4 13  1  0  0  0  0
  5  6  1  0  0  0  0
  5 23  2  3  0  0  0
  6  7  1  0  0  0  0
  8  7  1  6  0  0  0
  8  9  1  0  0  0  0
  8 13  1  0  0  0  0
  9 10  1  0  0  0  0
  9 15  1  6  0  0  0
  9 22  1  1  0  0  0
 10 11  1  0  0  0  0
 11 12  1  0  0  0  0
 12 13  1  0  0  0  0
 13 14  1  6  0  0  0
 15 16  1  0  0  0  0
 15 21  2  0  0  0  0
 16 17  1  0  0  0  0
 17 18  1  0  0  0  0
 18 19  1  0  0  0  0
 19 20  2  0  0  0  0
 23 24  1  0  0  0  0
M  END
>  <VC-4>
0.20412414

>  <VC-6>
0.11864191

>  <SPC-4>
5.8462501

>  <SwHBa>
13.978733

>  <SHCsats>
4.5320306

>  <SHother>
2.1335151

>  <SssCH2>
6.0268402

>  <ETA_Shape_Y>
0.21739

>  <ETA_dBetaP>
-0.29166999

>  <nAtomP>
7

>  <MDEC-24>
7.1997108

>  <MDEC-33>
3.5167592

>  <MDEC-34>
4.9734483

>  <MLFER_A>
0.546

>  <Classification>
0

$$$$
S(=O)(=O)(C)c1cc(Oc2cc(-n3c4c(nc3)c(ccc4)C(F)(F)F)ccc2)ccc1
  MOE2013           2D

 30 33  0  0  0  0  0  0  0  0999 V2000
   -0.0000   -0.0000    0.0000 S   0  0  0  0  0  0  0  0  0  0  0  0
    0.7506    1.2987    0.0000 O   0  0  0  0  0  0  0  0  0  0  0  0
   -0.7506   -1.2987    0.0000 O   0  0  0  0  0  0  0  0  0  0  0  0
    1.2987   -0.7506    0.0000 C   0  0  0  0  0  0  0  0  0  0  0  0
   -1.2987    0.7506    0.0000 C   0  0  0  0  0  0  0  0  0  0  0  0
   -2.5981    0.0011    0.0000 C   0  0  0  0  0  0  0  0  0  0  0  0
   -3.8968    0.7517    0.0000 C   0  0  0  0  0  0  0  0  0  0  0  0
   -5.1962    0.0023    0.0000 O   0  0  0  0  0  0  0  0  0  0  0  0
   -6.4949    0.7529    0.0000 C   0  0  0  0  0  0  0  0  0  0  0  0
   -7.7942    0.0034    0.0000 C   0  0  0  0  0  0  0  0  0  0  0  0
   -9.0929    0.7540    0.0000 C   0  0  0  0  0  0  0  0  0  0  0  0
  -10.3923    0.0046    0.0000 N   0  0  0  0  0  0  0  0  0  0  0  0
  -11.7624    0.6153    0.0000 C   0  0  0  0  0  0  0  0  0  0  0  0
  -12.7665   -0.4990    0.0000 C   0  0  0  0  0  0  0  0  0  0  0  0
  -12.0171   -1.7984    0.0000 N   0  0  0  0  0  0  0  0  0  0  0  0
  -10.5498   -1.4871    0.0000 C   0  0  0  0  0  0  0  0  0  0  0  0
  -14.2336   -0.1865    0.0000 C   0  0  0  0  0  0  0  0  0  0  0  0
  -14.6965    1.2403    0.0000 C   0  0  0  0  0  0  0  0  0  0  0  0
  -13.6923    2.3546    0.0000 C   0  0  0  0  0  0  0  0  0  0  0  0
  -12.2253    2.0421    0.0000 C   0  0  0  0  0  0  0  0  0  0  0  0
  -15.2378   -1.3008    0.0000 C   0  0  0  0  0  0  0  0  0  0  0  0
  -16.3521   -0.2966    0.0000 F   0  0  0  0  0  0  0  0  0  0  0  0
  -16.2420   -2.4150    0.0000 F   0  0  0  0  0  0  0  0  0  0  0  0
  -14.1235   -2.3050    0.0000 F   0  0  0  0  0  0  0  0  0  0  0  0
   -9.0923    2.2540    0.0000 C   0  0  0  0  0  0  0  0  0  0  0  0
   -7.7929    3.0034    0.0000 C   0  0  0  0  0  0  0  0  0  0  0  0
   -6.4942    2.2529    0.0000 C   0  0  0  0  0  0  0  0  0  0  0  0
   -3.8961    2.2517    0.0000 C   0  0  0  0  0  0  0  0  0  0  0  0
   -2.5968    3.0011    0.0000 C   0  0  0  0  0  0  0  0  0  0  0  0
   -1.2980    2.2506    0.0000 C   0  0  0  0  0  0  0  0  0  0  0  0
  1  2  2  0  0  0  0
  1  3  2  0  0  0  0
  1  4  1  0  0  0  0
  1  5  1  0  0  0  0
  5  6  1  0  0  0  0
  5 30  2  3  0  0  0
  6  7  2  3  0  0  0
  7  8  1  0  0  0  0
  7 28  1  0  0  0  0
  8  9  1  0  0  0  0
  9 10  1  0  0  0  0
  9 27  2  3  0  0  0
 10 11  2  3  0  0  0
 11 12  1  0  0  0  0
 11 25  1  0  0  0  0
 12 13  1  0  0  0  0
 12 16  1  0  0  0  0
 13 14  1  0  0  0  0
 13 20  2  3  0  0  0
 14 15  1  0  0  0  0
 14 17  2  3  0  0  0
 15 16  2  3  0  0  0
 17 18  1  0  0  0  0
 17 21  1  0  0  0  0
 18 19  2  3  0  0  0
 19 20  1  0  0  0  0
 21 22  1  0  0  0  0
 21 23  1  0  0  0  0
 21 24  1  0  0  0  0
 25 26  2  3  0  0  0
 26 27  1  0  0  0  0
 28 29  2  3  0  0  0
 29 30  1  0  0  0  0
M  END
>  <VC-4>
0.064497903

>  <VC-6>
0.020896472

>  <SPC-4>
6.0765805

>  <SwHBa>
19.184755

>  <SHCsats>
0

>  <SHother>
7.4643235

>  <SssCH2>
0

>  <ETA_Shape_Y>
0.27875999

>  <ETA_dBetaP>
-0.075000003

>  <nAtomP>
25

>  <MDEC-24>
1.9734976

>  <MDEC-33>
5.6154957

>  <MDEC-34>
1.6914598

>  <MLFER_A>
0.003

>  <Classification>
1

$$$$
Clc1cc(ccc1)-c1oc(C)c(n1)CN(CC)c1ccc(cc1)C(O)(C(F)(F)F)C(F)(F)F
  MOE2013           2D

 33 35  0  0  1  0  0  0  0  0999 V2000
   -0.0000    0.0000    0.0000 Cl  0  0  0  0  0  0  0  0  0  0  0  0
   -1.3682   -0.6149    0.0000 C   0  0  0  0  0  0  0  0  0  0  0  0
   -2.5848    0.2625    0.0000 C   0  0  0  0  0  0  0  0  0  0  0  0
   -3.9529   -0.3524    0.0000 C   0  0  0  0  0  0  0  0  0  0  0  0
   -4.1045   -1.8448    0.0000 C   0  0  0  0  0  0  0  0  0  0  0  0
   -2.8879   -2.7222    0.0000 C   0  0  0  0  0  0  0  0  0  0  0  0
   -1.5197   -2.1072    0.0000 C   0  0  0  0  0  0  0  0  0  0  0  0
   -5.1696    0.5250    0.0000 C   0  0  0  0  0  0  0  0  0  0  0  0
   -5.1748    2.0249    0.0000 O   0  0  0  0  0  0  0  0  0  0  0  0
   -6.6031    2.4834    0.0000 C   0  0  0  0  0  0  0  0  0  0  0  0
   -7.0716    3.9084    0.0000 C   0  0  0  0  0  0  0  0  0  0  0  0
   -7.4805    1.2668    0.0000 C   0  0  0  0  0  0  0  0  0  0  0  0
   -6.5945    0.0564    0.0000 N   0  0  0  0  0  0  0  0  0  0  0  0
   -8.9804    1.2615    0.0000 C   0  0  0  0  0  0  0  0  0  0  0  0
   -9.7259   -0.0401    0.0000 N   0  0  3  0  0  0  0  0  0  0  0  0
   -8.9713   -1.3365    0.0000 C   0  0  0  0  0  0  0  0  0  0  0  0
   -9.7167   -2.6382    0.0000 C   0  0  0  0  0  0  0  0  0  0  0  0
  -11.2259   -0.0454    0.0000 C   0  0  0  0  0  0  0  0  0  0  0  0
  -11.9713   -1.3471    0.0000 C   0  0  0  0  0  0  0  0  0  0  0  0
  -13.4713   -1.3523    0.0000 C   0  0  0  0  0  0  0  0  0  0  0  0
  -14.2258   -0.0560    0.0000 C   0  0  0  0  0  0  0  0  0  0  0  0
  -13.4804    1.2457    0.0000 C   0  0  0  0  0  0  0  0  0  0  0  0
  -11.9804    1.2510    0.0000 C   0  0  0  0  0  0  0  0  0  0  0  0
  -15.7258   -0.0612    0.0000 C   0  0  0  0  0  0  0  0  0  0  0  0
  -17.2258   -0.0665    0.0000 O   0  0  0  0  0  0  0  0  0  0  0  0
  -15.7311    1.4388    0.0000 C   0  0  0  0  0  0  0  0  0  0  0  0
  -17.2311    1.4335    0.0000 F   0  0  0  0  0  0  0  0  0  0  0  0
  -14.2311    1.4440    0.0000 F   0  0  0  0  0  0  0  0  0  0  0  0
  -15.7364    2.9387    0.0000 F   0  0  0  0  0  0  0  0  0  0  0  0
  -15.7206   -1.5612    0.0000 C   0  0  0  0  0  0  0  0  0  0  0  0
  -17.2205   -1.5665    0.0000 F   0  0  0  0  0  0  0  0  0  0  0  0
  -15.7153   -3.0612    0.0000 F   0  0  0  0  0  0  0  0  0  0  0  0
  -14.2206   -1.5559    0.0000 F   0  0  0  0  0  0  0  0  0  0  0  0
  1  2  1  0  0  0  0
  2  3  1  0  0  0  0
  2  7  2  3  0  0  0
  3  4  2  3  0  0  0
  4  5  1  0  0  0  0
  4  8  1  0  0  0  0
  5  6  2  3  0  0  0
  6  7  1  0  0  0  0
  8  9  1  0  0  0  0
  8 13  2  3  0  0  0
  9 10  1  0  0  0  0
 10 11  1  0  0  0  0
 10 12  2  3  0  0  0
 12 13  1  0  0  0  0
 12 14  1  0  0  0  0
 14 15  1  0  0  0  0
 15 16  1  0  0  0  0
 15 18  1  0  0  0  0
 16 17  1  0  0  0  0
 18 19  1  0  0  0  0
 18 23  2  3  0  0  0
 19 20  2  3  0  0  0
 20 21  1  0  0  0  0
 21 22  2  3  0  0  0
 21 24  1  0  0  0  0
 22 23  1  0  0  0  0
 24 25  1  0  0  0  0
 24 26  1  0  0  0  0
 24 30  1  0  0  0  0
 26 27  1  0  0  0  0
 26 28  1  0  0  0  0
 26 29  1  0  0  0  0
 30 31  1  0  0  0  0
 30 32  1  0  0  0  0
 30 33  1  0  0  0  0
M  END
>  <VC-4>
0.054948311

>  <VC-6>
0.05209782

>  <SPC-4>
9.3332777

>  <SwHBa>
13.961799

>  <SHCsats>
1.1421423

>  <SHother>
4.8447089

>  <SssCH2>
0.63585418

>  <ETA_Shape_Y>
0.26183

>  <ETA_dBetaP>
-0.28029999

>  <nAtomP>
11

>  <MDEC-24>
4.7830462

>  <MDEC-33>
5.5169764

>  <MDEC-34>
3.1132851

>  <MLFER_A>
0.85399997

>  <Classification>
0

$$$$
Clc1cc(ccc1OCCCOc1ccc2c(onc2C(F)(F)F)c1CCC)CC(=O)[O-]
  MOE2013           2D

 32 34  0  0  0  0  0  0  0  0999 V2000
    0.0000   -0.0000    0.0000 Cl  0  0  0  0  0  0  0  0  0  0  0  0
   -0.7520   -1.2979    0.0000 C   0  0  0  0  0  0  0  0  0  0  0  0
   -0.0039   -2.5981    0.0000 C   0  0  0  0  0  0  0  0  0  0  0  0
   -0.7559   -3.8960    0.0000 C   0  0  0  0  0  0  0  0  0  0  0  0
   -2.2559   -3.8937    0.0000 C   0  0  0  0  0  0  0  0  0  0  0  0
   -3.0039   -2.5935    0.0000 C   0  0  0  0  0  0  0  0  0  0  0  0
   -2.2520   -1.2956    0.0000 C   0  0  0  0  0  0  0  0  0  0  0  0
   -3.0000    0.0045    0.0000 O   0  0  0  0  0  0  0  0  0  0  0  0
   -4.5000    0.0068    0.0000 C   0  0  0  0  0  0  0  0  0  0  0  0
   -5.2480    1.3070    0.0000 C   0  0  0  0  0  0  0  0  0  0  0  0
   -6.7480    1.3092    0.0000 C   0  0  0  0  0  0  0  0  0  0  0  0
   -7.4961    2.6094    0.0000 O   0  0  0  0  0  0  0  0  0  0  0  0
   -8.9961    2.6116    0.0000 C   0  0  0  0  0  0  0  0  0  0  0  0
   -9.7480    1.3137    0.0000 C   0  0  0  0  0  0  0  0  0  0  0  0
  -11.2480    1.3160    0.0000 C   0  0  0  0  0  0  0  0  0  0  0  0
  -11.9961    2.6162    0.0000 C   0  0  0  0  0  0  0  0  0  0  0  0
  -11.2441    3.9141    0.0000 C   0  0  0  0  0  0  0  0  0  0  0  0
  -12.2461    5.0303    0.0000 O   0  0  0  0  0  0  0  0  0  0  0  0
  -13.6174    4.4223    0.0000 N   0  0  0  0  0  0  0  0  0  0  0  0
  -13.4628    2.9303    0.0000 C   0  0  0  0  0  0  0  0  0  0  0  0
  -14.5790    1.9282    0.0000 C   0  0  0  0  0  0  0  0  0  0  0  0
  -15.5811    3.0445    0.0000 F   0  0  0  0  0  0  0  0  0  0  0  0
  -13.5770    0.8120    0.0000 F   0  0  0  0  0  0  0  0  0  0  0  0
  -15.6953    0.9262    0.0000 F   0  0  0  0  0  0  0  0  0  0  0  0
   -9.7441    3.9118    0.0000 C   0  0  0  0  0  0  0  0  0  0  0  0
   -8.9922    5.2097    0.0000 C   0  0  0  0  0  0  0  0  0  0  0  0
   -9.7402    6.5099    0.0000 C   0  0  0  0  0  0  0  0  0  0  0  0
   -8.9882    7.8078    0.0000 C   0  0  0  0  0  0  0  0  0  0  0  0
   -0.0078   -5.1961    0.0000 C   0  0  0  0  0  0  0  0  0  0  0  0
    1.4922   -5.1984    0.0000 C   0  0  0  0  0  0  0  0  0  0  0  0
    2.2441   -3.9005    0.0000 O   0  0  0  0  0  0  0  0  0  0  0  0
    2.2402   -6.4986    0.0000 O   0  5  0  0  0  0  0  0  0  0  0  0
  1  2  1  0  0  0  0
  2  3  1  0  0  0  0
  2  7  2  3  0  0  0
  3  4  2  3  0  0  0
  4  5  1  0  0  0  0
  4 29  1  0  0  0  0
  5  6  2  3  0  0  0
  6  7  1  0  0  0  0
  7  8  1  0  0  0  0
  8  9  1  0  0  0  0
  9 10  1  0  0  0  0
 10 11  1  0  0  0  0
 11 12  1  0  0  0  0
 12 13  1  0  0  0  0
 13 14  1  0  0  0  0
 13 25  2  3  0  0  0
 14 15  2  3  0  0  0
 15 16  1  0  0  0  0
 16 17  2  3  0  0  0
 16 20  1  0  0  0  0
 17 18  1  0  0  0  0
 17 25  1  0  0  0  0
 18 19  1  0  0  0  0
 19 20  2  3  0  0  0
 20 21  1  0  0  0  0
 21 22  1  0  0  0  0
 21 23  1  0  0  0  0
 21 24  1  0  0  0  0
 25 26  1  0  0  0  0
 26 27  1  0  0  0  0
 27 28  1  0  0  0  0
 29 30  1  0  0  0  0
 30 31  2  0  0  0  0
 30 32  1  0  0  0  0
M  CHG  1  32  -1
M  END
>  <VC-4>
0.013498731

>  <VC-6>
0.0030184081

>  <SPC-4>
5.1003523

>  <SwHBa>
9.3900738

>  <SHCsats>
3.7101634

>  <SHother>
2.9479656

>  <SssCH2>
2.3169136

>  <ETA_Shape_Y>
0.30741999

>  <ETA_dBetaP>
-0.25781

>  <nAtomP>
10

>  <MDEC-24>
1.4314169

>  <MDEC-33>
7.3646069

>  <MDEC-34>
1.6844742

>  <MLFER_A>
0.24600001

>  <Classification>
0

$$$$
FC(F)(F)c1c2ncc(Cc3ccccc3)c(c2ccc1)-c1cc(ccc1)CNc1c2c(ccc1)c(ccc2)CC(=O)[O-]
  MOE2013           2D

 43 48  0  0  0  0  0  0  0  0999 V2000
    0.0000    0.0000    0.0000 F   0  0  0  0  0  0  0  0  0  0  0  0
   -0.1022   -1.4965    0.0000 C   0  0  0  0  0  0  0  0  0  0  0  0
   -0.2045   -2.9930    0.0000 F   0  0  0  0  0  0  0  0  0  0  0  0
   -1.5987   -1.3943    0.0000 F   0  0  0  0  0  0  0  0  0  0  0  0
    1.3943   -1.5987    0.0000 C   0  0  0  0  0  0  0  0  0  0  0  0
    2.0540   -2.9459    0.0000 C   0  0  0  0  0  0  0  0  0  0  0  0
    1.2172   -4.1908    0.0000 N   0  0  0  0  0  0  0  0  0  0  0  0
    1.8769   -5.5379    0.0000 C   0  0  0  0  0  0  0  0  0  0  0  0
    3.3734   -5.6402    0.0000 C   0  0  0  0  0  0  0  0  0  0  0  0
    4.0332   -6.9873    0.0000 C   0  0  0  0  0  0  0  0  0  0  0  0
    3.1964   -8.2322    0.0000 C   0  0  0  0  0  0  0  0  0  0  0  0
    3.8561   -9.5793    0.0000 C   0  0  0  0  0  0  0  0  0  0  0  0
    3.0193  -10.8242    0.0000 C   0  0  0  0  0  0  0  0  0  0  0  0
    1.5228  -10.7220    0.0000 C   0  0  0  0  0  0  0  0  0  0  0  0
    0.8631   -9.3749    0.0000 C   0  0  0  0  0  0  0  0  0  0  0  0
    1.6998   -8.1300    0.0000 C   0  0  0  0  0  0  0  0  0  0  0  0
    4.2102   -4.3953    0.0000 C   0  0  0  0  0  0  0  0  0  0  0  0
    3.5505   -3.0481    0.0000 C   0  0  0  0  0  0  0  0  0  0  0  0
    4.3873   -1.8032    0.0000 C   0  0  0  0  0  0  0  0  0  0  0  0
    3.7276   -0.4561    0.0000 C   0  0  0  0  0  0  0  0  0  0  0  0
    2.2311   -0.3538    0.0000 C   0  0  0  0  0  0  0  0  0  0  0  0
    5.7067   -4.4975    0.0000 C   0  0  0  0  0  0  0  0  0  0  0  0
    6.5435   -3.2526    0.0000 C   0  0  0  0  0  0  0  0  0  0  0  0
    8.0400   -3.3548    0.0000 C   0  0  0  0  0  0  0  0  0  0  0  0
    8.6998   -4.7020    0.0000 C   0  0  0  0  0  0  0  0  0  0  0  0
    7.8630   -5.9469    0.0000 C   0  0  0  0  0  0  0  0  0  0  0  0
    6.3665   -5.8446    0.0000 C   0  0  0  0  0  0  0  0  0  0  0  0
    8.8768   -2.1099    0.0000 C   0  0  0  0  0  0  0  0  0  0  0  0
   10.3733   -2.2122    0.0000 N   0  0  0  0  0  0  0  0  0  0  0  0
   11.2101   -0.9673    0.0000 C   0  0  0  0  0  0  0  0  0  0  0  0
   12.7067   -1.0695    0.0000 C   0  0  0  0  0  0  0  0  0  0  0  0
   13.5434    0.1754    0.0000 C   0  0  0  0  0  0  0  0  0  0  0  0
   12.8837    1.5225    0.0000 C   0  0  0  0  0  0  0  0  0  0  0  0
   11.3872    1.6248    0.0000 C   0  0  0  0  0  0  0  0  0  0  0  0
   10.5504    0.3799    0.0000 C   0  0  0  0  0  0  0  0  0  0  0  0
   15.0400    0.0732    0.0000 C   0  0  0  0  0  0  0  0  0  0  0  0
   15.6997   -1.2740    0.0000 C   0  0  0  0  0  0  0  0  0  0  0  0
   14.8629   -2.5189    0.0000 C   0  0  0  0  0  0  0  0  0  0  0  0
   13.3664   -2.4166    0.0000 C   0  0  0  0  0  0  0  0  0  0  0  0
   15.8768    1.3181    0.0000 C   0  0  0  0  0  0  0  0  0  0  0  0
   17.3733    1.2158    0.0000 C   0  0  0  0  0  0  0  0  0  0  0  0
   18.2101    2.4607    0.0000 O   0  0  0  0  0  0  0  0  0  0  0  0
   18.0330   -0.1313    0.0000 O   0  5  0  0  0  0  0  0  0  0  0  0
  1  2  1  0  0  0  0
  2  3  1  0  0  0  0
  2  4  1  0  0  0  0
  2  5  1  0  0  0  0
  5  6  1  0  0  0  0
  5 21  2  3  0  0  0
  6  7  1  0  0  0  0
  6 18  2  3  0  0  0
  7  8  2  3  0  0  0
  8  9  1  0  0  0  0
  9 10  1  0  0  0  0
  9 17  2  3  0  0  0
 10 11  1  0  0  0  0
 11 12  1  0  0  0  0
 11 16  2  3  0  0  0
 12 13  2  3  0  0  0
 13 14  1  0  0  0  0
 14 15  2  3  0  0  0
 15 16  1  0  0  0  0
 17 18  1  0  0  0  0
 17 22  1  0  0  0  0
 18 19  1  0  0  0  0
 19 20  2  3  0  0  0
 20 21  1  0  0  0  0
 22 23  1  0  0  0  0
 22 27  2  3  0  0  0
 23 24  2  3  0  0  0
 24 25  1  0  0  0  0
 24 28  1  0  0  0  0
 25 26  2  3  0  0  0
 26 27  1  0  0  0  0
 28 29  1  0  0  0  0
 29 30  1  0  0  0  0
 30 31  1  0  0  0  0
 30 35  2  3  0  0  0
 31 32  1  0  0  0  0
 31 39  2  3  0  0  0
 32 33  1  0  0  0  0
 32 36  2  3  0  0  0
 33 34  2  3  0  0  0
 34 35  1  0  0  0  0
 36 37  1  0  0  0  0
 36 40  1  0  0  0  0
 37 38  2  3  0  0  0
 38 39  1  0  0  0  0
 40 41  1  0  0  0  0
 41 42  2  0  0  0  0
 41 43  1  0  0  0  0
M  CHG  1  43  -1
M  END
>  <VC-4>
0.013498731

>  <VC-6>
0.0038967479

>  <SPC-4>
6.6877308

>  <SwHBa>
40.572338

>  <SHCsats>
0

>  <SHother>
9.9636536

>  <SssCH2>
0.78634501

>  <ETA_Shape_Y>
0.31981999

>  <ETA_dBetaP>
-0.017440001

>  <nAtomP>
16

>  <MDEC-24>
2.8872731

>  <MDEC-33>
16.695616

>  <MDEC-34>
2.2595589

>  <MLFER_A>
0.44

>  <Classification>
1

$$$$
Clc1cccc(C(F)(F)F)c1COc1cc(ccc1)-c1c2c(nnc1Cc1ccccc1)c(Cl)ccc2
  MOE2013           2D

 37 41  0  0  0  0  0  0  0  0999 V2000
   -0.0000   -0.0000    0.0000 Cl  0  0  0  0  0  0  0  0  0  0  0  0
   -0.7536   -1.2969    0.0000 C   0  0  0  0  0  0  0  0  0  0  0  0
   -2.2536   -1.2927    0.0000 C   0  0  0  0  0  0  0  0  0  0  0  0
   -3.0072   -2.5897    0.0000 C   0  0  0  0  0  0  0  0  0  0  0  0
   -2.2609   -3.8908    0.0000 C   0  0  0  0  0  0  0  0  0  0  0  0
   -0.7609   -3.8950    0.0000 C   0  0  0  0  0  0  0  0  0  0  0  0
   -0.0145   -5.1961    0.0000 C   0  0  0  0  0  0  0  0  0  0  0  0
    1.2866   -4.4498    0.0000 F   0  0  0  0  0  0  0  0  0  0  0  0
   -1.3156   -5.9425    0.0000 F   0  0  0  0  0  0  0  0  0  0  0  0
    0.7319   -6.4973    0.0000 F   0  0  0  0  0  0  0  0  0  0  0  0
   -0.0073   -2.5981    0.0000 C   0  0  0  0  0  0  0  0  0  0  0  0
    1.4927   -2.6023    0.0000 C   0  0  0  0  0  0  0  0  0  0  0  0
    2.2464   -1.3053    0.0000 O   0  0  0  0  0  0  0  0  0  0  0  0
    3.7464   -1.3095    0.0000 C   0  0  0  0  0  0  0  0  0  0  0  0
    4.5000   -0.0126    0.0000 C   0  0  0  0  0  0  0  0  0  0  0  0
    6.0000   -0.0168    0.0000 C   0  0  0  0  0  0  0  0  0  0  0  0
    6.7463   -1.3179    0.0000 C   0  0  0  0  0  0  0  0  0  0  0  0
    5.9927   -2.6148    0.0000 C   0  0  0  0  0  0  0  0  0  0  0  0
    4.4927   -2.6106    0.0000 C   0  0  0  0  0  0  0  0  0  0  0  0
    6.7536    1.2802    0.0000 C   0  0  0  0  0  0  0  0  0  0  0  0
    6.0072    2.5813    0.0000 C   0  0  0  0  0  0  0  0  0  0  0  0
    6.7609    3.8782    0.0000 C   0  0  0  0  0  0  0  0  0  0  0  0
    8.2609    3.8741    0.0000 N   0  0  0  0  0  0  0  0  0  0  0  0
    9.0072    2.5729    0.0000 N   0  0  0  0  0  0  0  0  0  0  0  0
    8.2536    1.2760    0.0000 C   0  0  0  0  0  0  0  0  0  0  0  0
    9.0000   -0.0251    0.0000 C   0  0  0  0  0  0  0  0  0  0  0  0
   10.5000   -0.0293    0.0000 C   0  0  0  0  0  0  0  0  0  0  0  0
   11.2536    1.2676    0.0000 C   0  0  0  0  0  0  0  0  0  0  0  0
   12.7536    1.2634    0.0000 C   0  0  0  0  0  0  0  0  0  0  0  0
   13.4999   -0.0377    0.0000 C   0  0  0  0  0  0  0  0  0  0  0  0
   12.7463   -1.3346    0.0000 C   0  0  0  0  0  0  0  0  0  0  0  0
   11.2463   -1.3305    0.0000 C   0  0  0  0  0  0  0  0  0  0  0  0
    6.0145    5.1794    0.0000 C   0  0  0  0  0  0  0  0  0  0  0  0
    6.7681    6.4763    0.0000 Cl  0  0  0  0  0  0  0  0  0  0  0  0
    4.5145    5.1836    0.0000 C   0  0  0  0  0  0  0  0  0  0  0  0
    3.7609    3.8866    0.0000 C   0  0  0  0  0  0  0  0  0  0  0  0
    4.5072    2.5855    0.0000 C   0  0  0  0  0  0  0  0  0  0  0  0
  1  2  1  0  0  0  0
  2  3  1  0  0  0  0
  2 11  2  3  0  0  0
  3  4  2  3  0  0  0
  4  5  1  0  0  0  0
  5  6  2  3  0  0  0
  6  7  1  0  0  0  0
  6 11  1  0  0  0  0
  7  8  1  0  0  0  0
  7  9  1  0  0  0  0
  7 10  1  0  0  0  0
 11 12  1  0  0  0  0
 12 13  1  0  0  0  0
 13 14  1  0  0  0  0
 14 15  1  0  0  0  0
 14 19  2  3  0  0  0
 15 16  2  3  0  0  0
 16 17  1  0  0  0  0
 16 20  1  0  0  0  0
 17 18  2  3  0  0  0
 18 19  1  0  0  0  0
 20 21  1  0  0  0  0
 20 25  2  3  0  0  0
 21 22  1  0  0  0  0
 21 37  2  3  0  0  0
 22 23  1  0  0  0  0
 22 33  2  3  0  0  0
 23 24  2  3  0  0  0
 24 25  1  0  0  0  0
 25 26  1  0  0  0  0
 26 27  1  0  0  0  0
 27 28  1  0  0  0  0
 27 32  2  3  0  0  0
 28 29  2  3  0  0  0
 29 30  1  0  0  0  0
 30 31  2  3  0  0  0
 31 32  1  0  0  0  0
 33 34  1  0  0  0  0
 33 35  1  0  0  0  0
 35 36  2  3  0  0  0
 36 37  1  0  0  0  0
M  END
>  <VC-4>
0.013498731

>  <VC-6>
0.0038967479

>  <SPC-4>
6.1468353

>  <SwHBa>
35.852406

>  <SHCsats>
0

>  <SHother>
7.8589129

>  <SssCH2>
0.47551116

>  <ETA_Shape_Y>
0.30693999

>  <ETA_dBetaP>
-0.0473

>  <nAtomP>
17

>  <MDEC-24>
2.2855546

>  <MDEC-33>
14.068643

>  <MDEC-34>
1.9698397

>  <MLFER_A>
0.003

>  <Classification>
1

$$$$
S(=O)(=O)(CC)c1cc(ccc1)-c1cc(ccc1)-c1c2c(ncc1C)c(ccc2)C(F)(F)F
  MOE2013           2D

 32 35  0  0  0  0  0  0  0  0999 V2000
   -0.0000   -0.0000    0.0000 S   0  0  0  0  0  0  0  0  0  0  0  0
    0.7482    1.3001    0.0000 O   0  0  0  0  0  0  0  0  0  0  0  0
   -0.7482   -1.3001    0.0000 O   0  0  0  0  0  0  0  0  0  0  0  0
    1.3001   -0.7482    0.0000 C   0  0  0  0  0  0  0  0  0  0  0  0
    2.5981    0.0035    0.0000 C   0  0  0  0  0  0  0  0  0  0  0  0
   -1.3001    0.7482    0.0000 C   0  0  0  0  0  0  0  0  0  0  0  0
   -2.5981   -0.0035    0.0000 C   0  0  0  0  0  0  0  0  0  0  0  0
   -3.8981    0.7447    0.0000 C   0  0  0  0  0  0  0  0  0  0  0  0
   -3.9002    2.2447    0.0000 C   0  0  0  0  0  0  0  0  0  0  0  0
   -2.6022    2.9965    0.0000 C   0  0  0  0  0  0  0  0  0  0  0  0
   -1.3021    2.2482    0.0000 C   0  0  0  0  0  0  0  0  0  0  0  0
   -5.1961   -0.0071    0.0000 C   0  0  0  0  0  0  0  0  0  0  0  0
   -6.4962    0.7411    0.0000 C   0  0  0  0  0  0  0  0  0  0  0  0
   -7.7942   -0.0106    0.0000 C   0  0  0  0  0  0  0  0  0  0  0  0
   -7.7922   -1.5106    0.0000 C   0  0  0  0  0  0  0  0  0  0  0  0
   -6.4921   -2.2588    0.0000 C   0  0  0  0  0  0  0  0  0  0  0  0
   -5.1941   -1.5071    0.0000 C   0  0  0  0  0  0  0  0  0  0  0  0
   -9.0943    0.7376    0.0000 C   0  0  0  0  0  0  0  0  0  0  0  0
  -10.3923   -0.0142    0.0000 C   0  0  0  0  0  0  0  0  0  0  0  0
  -11.6924    0.7341    0.0000 C   0  0  0  0  0  0  0  0  0  0  0  0
  -11.6944    2.2341    0.0000 N   0  0  0  0  0  0  0  0  0  0  0  0
  -10.3964    2.9858    0.0000 C   0  0  0  0  0  0  0  0  0  0  0  0
   -9.0963    2.2376    0.0000 C   0  0  0  0  0  0  0  0  0  0  0  0
   -7.7983    2.9894    0.0000 C   0  0  0  0  0  0  0  0  0  0  0  0
  -12.9904   -0.0177    0.0000 C   0  0  0  0  0  0  0  0  0  0  0  0
  -12.9883   -1.5177    0.0000 C   0  0  0  0  0  0  0  0  0  0  0  0
  -11.6883   -2.2659    0.0000 C   0  0  0  0  0  0  0  0  0  0  0  0
  -10.3903   -1.5142    0.0000 C   0  0  0  0  0  0  0  0  0  0  0  0
  -14.2904    0.7305    0.0000 C   0  0  0  0  0  0  0  0  0  0  0  0
  -15.5905    1.4788    0.0000 F   0  0  0  0  0  0  0  0  0  0  0  0
  -15.0387   -0.5695    0.0000 F   0  0  0  0  0  0  0  0  0  0  0  0
  -13.5422    2.0306    0.0000 F   0  0  0  0  0  0  0  0  0  0  0  0
  1  2  2  0  0  0  0
  1  3  2  0  0  0  0
  1  4  1  0  0  0  0
  1  6  1  0  0  0  0
  4  5  1  0  0  0  0
  6  7  1  0  0  0  0
  6 11  2  3  0  0  0
  7  8  2  3  0  0  0
  8  9  1  0  0  0  0
  8 12  1  0  0  0  0
  9 10  2  3  0  0  0
 10 11  1  0  0  0  0
 12 13  1  0  0  0  0
 12 17  2  3  0  0  0
 13 14  2  3  0  0  0
 14 15  1  0  0  0  0
 14 18  1  0  0  0  0
 15 16  2  3  0  0  0
 16 17  1  0  0  0  0
 18 19  1  0  0  0  0
 18 23  2  3  0  0  0
 19 20  1  0  0  0  0
 19 28  2  3  0  0  0
 20 21  1  0  0  0  0
 20 25  2  3  0  0  0
 21 22  2  3  0  0  0
 22 23  1  0  0  0  0
 23 24  1  0  0  0  0
 25 26  1  0  0  0  0
 25 29  1  0  0  0  0
 26 27  2  3  0  0  0
 27 28  1  0  0  0  0
 29 30  1  0  0  0  0
 29 31  1  0  0  0  0
 29 32  1  0  0  0  0
M  END
>  <VC-4>
0.049560592

>  <VC-6>
0.015917368

>  <SPC-4>
7.1220493

>  <SwHBa>
23.488379

>  <SHCsats>
0.97842222

>  <SHother>
6.5713973

>  <SssCH2>
0.14837745

>  <ETA_Shape_Y>
0.29493999

>  <ETA_dBetaP>
-0.015629999

>  <nAtomP>
25

>  <MDEC-24>
2.0913112

>  <MDEC-33>
11.75175

>  <MDEC-34>
2.1887937

>  <MLFER_A>
0.003

>  <Classification>
1

$$$$
S(=O)(=O)(C)c1cc(Oc2cc(ccc2)-c2n3c(nc2C[NH+]2CCCCC2)C(=CC=C3)C(F)(F)F)ccc1
  MOE2013           2D

 37 41  0  0  0  0  0  0  0  0999 V2000
   -0.0000    0.0000    0.0000 S   0  0  0  0  0  0  0  0  0  0  0  0
   -0.7560    1.2956    0.0000 O   0  0  0  0  0  0  0  0  0  0  0  0
    0.7560   -1.2956    0.0000 O   0  0  0  0  0  0  0  0  0  0  0  0
    1.2956    0.7560    0.0000 C   0  0  0  0  0  0  0  0  0  0  0  0
   -1.2956   -0.7560    0.0000 C   0  0  0  0  0  0  0  0  0  0  0  0
   -2.5980   -0.0119    0.0000 C   0  0  0  0  0  0  0  0  0  0  0  0
   -3.8936   -0.7679    0.0000 C   0  0  0  0  0  0  0  0  0  0  0  0
   -5.1961   -0.0239    0.0000 O   0  0  0  0  0  0  0  0  0  0  0  0
   -6.4917   -0.7799    0.0000 C   0  0  0  0  0  0  0  0  0  0  0  0
   -7.7941   -0.0358    0.0000 C   0  0  0  0  0  0  0  0  0  0  0  0
   -9.0897   -0.7918    0.0000 C   0  0  0  0  0  0  0  0  0  0  0  0
   -9.0828   -2.2918    0.0000 C   0  0  0  0  0  0  0  0  0  0  0  0
   -7.7804   -3.0358    0.0000 C   0  0  0  0  0  0  0  0  0  0  0  0
   -6.4848   -2.2798    0.0000 C   0  0  0  0  0  0  0  0  0  0  0  0
  -10.3922   -0.0478    0.0000 C   0  0  0  0  0  0  0  0  0  0  0  0
  -10.5558    1.4433    0.0000 N   0  0  0  0  0  0  0  0  0  0  0  0
  -12.0245    1.7484    0.0000 C   0  0  0  0  0  0  0  0  0  0  0  0
  -12.7685    0.4459    0.0000 N   0  0  0  0  0  0  0  0  0  0  0  0
  -11.7597   -0.6642    0.0000 C   0  0  0  0  0  0  0  0  0  0  0  0
  -12.0648   -2.1328    0.0000 C   0  0  0  0  0  0  0  0  0  0  0  0
  -13.4893   -2.6029    0.0000 N   0  3  0  0  0  0  0  0  0  0  0  0
  -13.7944   -4.0715    0.0000 C   0  0  0  0  0  0  0  0  0  0  0  0
  -15.2188   -4.5416    0.0000 C   0  0  0  0  0  0  0  0  0  0  0  0
  -16.3381   -3.5430    0.0000 C   0  0  0  0  0  0  0  0  0  0  0  0
  -16.0330   -2.0744    0.0000 C   0  0  0  0  0  0  0  0  0  0  0  0
  -14.6086   -1.6043    0.0000 C   0  0  0  0  0  0  0  0  0  0  0  0
  -12.4946    3.1728    0.0000 C   0  0  0  0  0  0  0  0  0  0  0  0
  -11.4960    4.2921    0.0000 C   0  0  0  0  0  0  0  0  0  0  0  0
  -10.0274    3.9870    0.0000 C   0  0  0  0  0  0  0  0  0  0  0  0
   -9.5573    2.5626    0.0000 C   0  0  0  0  0  0  0  0  0  0  0  0
  -13.9632    3.4779    0.0000 C   0  0  0  0  0  0  0  0  0  0  0  0
  -13.6581    4.9466    0.0000 F   0  0  0  0  0  0  0  0  0  0  0  0
  -14.2683    2.0093    0.0000 F   0  0  0  0  0  0  0  0  0  0  0  0
  -15.4318    3.7831    0.0000 F   0  0  0  0  0  0  0  0  0  0  0  0
   -3.8867   -2.2679    0.0000 C   0  0  0  0  0  0  0  0  0  0  0  0
   -2.5843   -3.0119    0.0000 C   0  0  0  0  0  0  0  0  0  0  0  0
   -1.2887   -2.2559    0.0000 C   0  0  0  0  0  0  0  0  0  0  0  0
  1  2  2  0  0  0  0
  1  3  2  0  0  0  0
  1  4  1  0  0  0  0
  1  5  1  0  0  0  0
  5  6  1  0  0  0  0
  5 37  2  3  0  0  0
  6  7  2  3  0  0  0
  7  8  1  0  0  0  0
  7 35  1  0  0  0  0
  8  9  1  0  0  0  0
  9 10  1  0  0  0  0
  9 14  2  3  0  0  0
 10 11  2  3  0  0  0
 11 12  1  0  0  0  0
 11 15  1  0  0  0  0
 12 13  2  3  0  0  0
 13 14  1  0  0  0  0
 15 16  1  0  0  0  0
 15 19  2  3  0  0  0
 16 17  1  0  0  0  0
 16 30  1  0  0  0  0
 17 18  2  3  0  0  0
 17 27  1  0  0  0  0
 18 19  1  0  0  0  0
 19 20  1  0  0  0  0
 20 21  1  0  0  0  0
 21 22  1  0  0  0  0
 21 26  1  0  0  0  0
 22 23  1  0  0  0  0
 23 24  1  0  0  0  0
 24 25  1  0  0  0  0
 25 26  1  0  0  0  0
 27 28  2  3  0  0  0
 27 31  1  0  0  0  0
 28 29  1  0  0  0  0
 29 30  2  3  0  0  0
 31 32  1  0  0  0  0
 31 33  1  0  0  0  0
 31 34  1  0  0  0  0
 35 36  2  3  0  0  0
 36 37  1  0  0  0  0
M  CHG  1  21   1
M  END
>  <VC-4>
0.064497903

>  <VC-6>
0.020896472

>  <SPC-4>
6.804585

>  <SwHBa>
19.600054

>  <SHCsats>
2.0759437

>  <SHother>
6.4941077

>  <SssCH2>
5.7958021

>  <ETA_Shape_Y>
0.27601001

>  <ETA_dBetaP>
-0.18919

>  <nAtomP>
25

>  <MDEC-24>
2.567879

>  <MDEC-33>
7.9527645

>  <MDEC-34>
1.8727652

>  <MLFER_A>
0.003

>  <Classification>
1

$$$$
Clc1c2nc(n(c2ccc1)-c1cc(Oc2cc(S(=O)(=O)CC)ccc2)ccc1)C
  MOE2013           2D

 29 32  0  0  0  0  0  0  0  0999 V2000
    0.0000    0.0000    0.0000 Cl  0  0  0  0  0  0  0  0  0  0  0  0
    1.2966   -0.7543    0.0000 C   0  0  0  0  0  0  0  0  0  0  0  0
    2.5981   -0.0086    0.0000 C   0  0  0  0  0  0  0  0  0  0  0  0
    2.9148    1.4576    0.0000 N   0  0  0  0  0  0  0  0  0  0  0  0
    4.4070    1.6095    0.0000 C   0  0  0  0  0  0  0  0  0  0  0  0
    5.0126    0.2372    0.0000 N   0  0  0  0  0  0  0  0  0  0  0  0
    3.8946   -0.7628    0.0000 C   0  0  0  0  0  0  0  0  0  0  0  0
    3.8897   -2.2628    0.0000 C   0  0  0  0  0  0  0  0  0  0  0  0
    2.5882   -3.0085    0.0000 C   0  0  0  0  0  0  0  0  0  0  0  0
    1.2916   -2.2543    0.0000 C   0  0  0  0  0  0  0  0  0  0  0  0
    6.4788   -0.0795    0.0000 C   0  0  0  0  0  0  0  0  0  0  0  0
    7.4862    1.0319    0.0000 C   0  0  0  0  0  0  0  0  0  0  0  0
    8.9524    0.7152    0.0000 C   0  0  0  0  0  0  0  0  0  0  0  0
    9.9597    1.8266    0.0000 O   0  0  0  0  0  0  0  0  0  0  0  0
   11.4259    1.5099    0.0000 C   0  0  0  0  0  0  0  0  0  0  0  0
   12.4333    2.6213    0.0000 C   0  0  0  0  0  0  0  0  0  0  0  0
   13.8995    2.3046    0.0000 C   0  0  0  0  0  0  0  0  0  0  0  0
   14.9068    3.4160    0.0000 S   0  0  0  0  0  0  0  0  0  0  0  0
   16.0182    2.4087    0.0000 O   0  0  0  0  0  0  0  0  0  0  0  0
   13.7954    4.4234    0.0000 O   0  0  0  0  0  0  0  0  0  0  0  0
   15.9142    4.5274    0.0000 C   0  0  0  0  0  0  0  0  0  0  0  0
   17.3804    4.2108    0.0000 C   0  0  0  0  0  0  0  0  0  0  0  0
   14.3583    0.8765    0.0000 C   0  0  0  0  0  0  0  0  0  0  0  0
   13.3509   -0.2349    0.0000 C   0  0  0  0  0  0  0  0  0  0  0  0
   11.8847    0.0818    0.0000 C   0  0  0  0  0  0  0  0  0  0  0  0
    9.4112   -0.7129    0.0000 C   0  0  0  0  0  0  0  0  0  0  0  0
    8.4038   -1.8243    0.0000 C   0  0  0  0  0  0  0  0  0  0  0  0
    6.9377   -1.5076    0.0000 C   0  0  0  0  0  0  0  0  0  0  0  0
    5.1613    2.9061    0.0000 C   0  0  0  0  0  0  0  0  0  0  0  0
  1  2  1  0  0  0  0
  2  3  1  0  0  0  0
  2 10  2  3  0  0  0
  3  4  1  0  0  0  0
  3  7  2  3  0  0  0
  4  5  2  3  0  0  0
  5  6  1  0  0  0  0
  5 29  1  0  0  0  0
  6  7  1  0  0  0  0
  6 11  1  0  0  0  0
  7  8  1  0  0  0  0
  8  9  2  3  0  0  0
  9 10  1  0  0  0  0
 11 12  1  0  0  0  0
 11 28  2  3  0  0  0
 12 13  2  3  0  0  0
 13 14  1  0  0  0  0
 13 26  1  0  0  0  0
 14 15  1  0  0  0  0
 15 16  1  0  0  0  0
 15 25  2  3  0  0  0
 16 17  2  3  0  0  0
 17 18  1  0  0  0  0
 17 23  1  0  0  0  0
 18 19  2  0  0  0  0
 18 20  2  0  0  0  0
 18 21  1  0  0  0  0
 21 22  1  0  0  0  0
 23 24  2  3  0  0  0
 24 25  1  0  0  0  0
 26 27  2  3  0  0  0
 27 28  1  0  0  0  0
M  END
>  <VC-4>
0.036061861

>  <VC-6>
0.01202062

>  <SPC-4>
5.7711539

>  <SwHBa>
27.793945

>  <SHCsats>
0.9682638

>  <SHother>
5.7996097

>  <SssCH2>
0.20539103

>  <ETA_Shape_Y>
0.30667001

>  <ETA_dBetaP>
-0.043099999

>  <nAtomP>
25

>  <MDEC-24>
0

>  <MDEC-33>
7.7036209

>  <MDEC-34>
0

>  <MLFER_A>
0.003

>  <Classification>
1

$$$$
Fc1c(cccc1C(F)(F)F)COc1cc(ccc1)-c1c2c(nnc1Cc1ccccc1)c(ccc2)C(F)(F)F
  MOE2013           2D

 40 44  0  0  0  0  0  0  0  0999 V2000
   -0.0000   -0.0000    0.0000 F   0  0  0  0  0  0  0  0  0  0  0  0
   -0.7573    1.2948    0.0000 C   0  0  0  0  0  0  0  0  0  0  0  0
   -2.2573    1.2863    0.0000 C   0  0  0  0  0  0  0  0  0  0  0  0
   -3.0146    2.5811    0.0000 C   0  0  0  0  0  0  0  0  0  0  0  0
   -2.2720    3.8843    0.0000 C   0  0  0  0  0  0  0  0  0  0  0  0
   -0.7720    3.8928    0.0000 C   0  0  0  0  0  0  0  0  0  0  0  0
   -0.0147    2.5980    0.0000 C   0  0  0  0  0  0  0  0  0  0  0  0
    1.4853    2.6065    0.0000 C   0  0  0  0  0  0  0  0  0  0  0  0
    2.9853    2.6150    0.0000 F   0  0  0  0  0  0  0  0  0  0  0  0
    1.4768    4.1065    0.0000 F   0  0  0  0  0  0  0  0  0  0  0  0
    1.4938    1.1065    0.0000 F   0  0  0  0  0  0  0  0  0  0  0  0
   -3.0000   -0.0170    0.0000 C   0  0  0  0  0  0  0  0  0  0  0  0
   -4.4999   -0.0254    0.0000 O   0  0  0  0  0  0  0  0  0  0  0  0
   -5.2426   -1.3287    0.0000 C   0  0  0  0  0  0  0  0  0  0  0  0
   -6.7425   -1.3372    0.0000 C   0  0  0  0  0  0  0  0  0  0  0  0
   -7.4852   -2.6404    0.0000 C   0  0  0  0  0  0  0  0  0  0  0  0
   -6.7279   -3.9352    0.0000 C   0  0  0  0  0  0  0  0  0  0  0  0
   -5.2279   -3.9267    0.0000 C   0  0  0  0  0  0  0  0  0  0  0  0
   -4.4852   -2.6235    0.0000 C   0  0  0  0  0  0  0  0  0  0  0  0
   -8.9852   -2.6489    0.0000 C   0  0  0  0  0  0  0  0  0  0  0  0
   -9.7425   -1.3541    0.0000 C   0  0  0  0  0  0  0  0  0  0  0  0
  -11.2425   -1.3626    0.0000 C   0  0  0  0  0  0  0  0  0  0  0  0
  -11.9851   -2.6659    0.0000 N   0  0  0  0  0  0  0  0  0  0  0  0
  -11.2278   -3.9607    0.0000 N   0  0  0  0  0  0  0  0  0  0  0  0
   -9.7278   -3.9522    0.0000 C   0  0  0  0  0  0  0  0  0  0  0  0
   -8.9705   -5.2470    0.0000 C   0  0  0  0  0  0  0  0  0  0  0  0
   -9.7131   -6.5502    0.0000 C   0  0  0  0  0  0  0  0  0  0  0  0
   -8.9558   -7.8450    0.0000 C   0  0  0  0  0  0  0  0  0  0  0  0
   -9.6984   -9.1482    0.0000 C   0  0  0  0  0  0  0  0  0  0  0  0
  -11.1984   -9.1567    0.0000 C   0  0  0  0  0  0  0  0  0  0  0  0
  -11.9557   -7.8620    0.0000 C   0  0  0  0  0  0  0  0  0  0  0  0
  -11.2131   -6.5587    0.0000 C   0  0  0  0  0  0  0  0  0  0  0  0
  -11.9998   -0.0678    0.0000 C   0  0  0  0  0  0  0  0  0  0  0  0
  -11.2572    1.2354    0.0000 C   0  0  0  0  0  0  0  0  0  0  0  0
   -9.7572    1.2439    0.0000 C   0  0  0  0  0  0  0  0  0  0  0  0
   -8.9999   -0.0509    0.0000 C   0  0  0  0  0  0  0  0  0  0  0  0
  -13.4998   -0.0763    0.0000 C   0  0  0  0  0  0  0  0  0  0  0  0
  -13.4913   -1.5763    0.0000 F   0  0  0  0  0  0  0  0  0  0  0  0
  -14.9998   -0.0848    0.0000 F   0  0  0  0  0  0  0  0  0  0  0  0
  -13.5083    1.4236    0.0000 F   0  0  0  0  0  0  0  0  0  0  0  0
  1  2  1  0  0  0  0
  2  3  1  0  0  0  0
  2  7  2  3  0  0  0
  3  4  2  3  0  0  0
  3 12  1  0  0  0  0
  4  5  1  0  0  0  0
  5  6  2  3  0  0  0
  6  7  1  0  0  0  0
  7  8  1  0  0  0  0
  8  9  1  0  0  0  0
  8 10  1  0  0  0  0
  8 11  1  0  0  0  0
 12 13  1  0  0  0  0
 13 14  1  0  0  0  0
 14 15  1  0  0  0  0
 14 19  2  3  0  0  0
 15 16  2  3  0  0  0
 16 17  1  0  0  0  0
 16 20  1  0  0  0  0
 17 18  2  3  0  0  0
 18 19  1  0  0  0  0
 20 21  1  0  0  0  0
 20 25  2  3  0  0  0
 21 22  1  0  0  0  0
 21 36  2  3  0  0  0
 22 23  1  0  0  0  0
 22 33  2  3  0  0  0
 23 24  2  3  0  0  0
 24 25  1  0  0  0  0
 25 26  1  0  0  0  0
 26 27  1  0  0  0  0
 27 28  1  0  0  0  0
 27 32  2  3  0  0  0
 28 29  2  3  0  0  0
 29 30  1  0  0  0  0
 30 31  2  3  0  0  0
 31 32  1  0  0  0  0
 33 34  1  0  0  0  0
 33 37  1  0  0  0  0
 34 35  2  3  0  0  0
 35 36  1  0  0  0  0
 37 38  1  0  0  0  0
 37 39  1  0  0  0  0
 37 40  1  0  0  0  0
M  END
>  <VC-4>
0.026997462

>  <VC-6>
0.0077934959

>  <SPC-4>
7.3853812

>  <SwHBa>
20.273142

>  <SHCsats>
0

>  <SHother>
9.171649

>  <SssCH2>
-0.22268523

>  <ETA_Shape_Y>
0.30331001

>  <ETA_dBetaP>
-0.09375

>  <nAtomP>
17

>  <MDEC-24>
4.4978175

>  <MDEC-33>
13.804522

>  <MDEC-34>
4.036026

>  <MLFER_A>
0.003

>  <Classification>
1

$$$$
FC(F)(F)C(O)(C(F)(F)F)c1ccc(N(CC)C[C@@H](O)c2ccccc2)cc1
  MOE2013           2D

 28 29  0  0  1  0  0  0  0  0999 V2000
    0.0000    0.0000    0.0000 F   0  0  0  0  0  0  0  0  0  0  0  0
    1.4191   -0.4861    0.0000 C   0  0  0  0  0  0  0  0  0  0  0  0
    0.9330   -1.9051    0.0000 F   0  0  0  0  0  0  0  0  0  0  0  0
    2.8381   -0.9722    0.0000 F   0  0  0  0  0  0  0  0  0  0  0  0
    1.9051    0.9330    0.0000 C   0  0  0  0  0  0  0  0  0  0  0  0
    0.4861    1.4191    0.0000 O   0  0  0  0  0  0  0  0  0  0  0  0
    2.3912    2.3520    0.0000 C   0  0  0  0  0  0  0  0  0  0  0  0
    0.9722    2.8381    0.0000 F   0  0  0  0  0  0  0  0  0  0  0  0
    2.8773    3.7711    0.0000 F   0  0  0  0  0  0  0  0  0  0  0  0
    3.8103    1.8660    0.0000 F   0  0  0  0  0  0  0  0  0  0  0  0
    3.3242    0.4469    0.0000 C   0  0  0  0  0  0  0  0  0  0  0  0
    4.4547    1.4328    0.0000 C   0  0  0  0  0  0  0  0  0  0  0  0
    5.8737    0.9467    0.0000 C   0  0  0  0  0  0  0  0  0  0  0  0
    6.1623   -0.5253    0.0000 C   0  0  0  0  0  0  0  0  0  0  0  0
    7.5814   -1.0113    0.0000 N   0  0  3  0  0  0  0  0  0  0  0  0
    7.8699   -2.4833    0.0000 C   0  0  0  0  0  0  0  0  0  0  0  0
    6.7395   -3.4692    0.0000 C   0  0  0  0  0  0  0  0  0  0  0  0
    8.7119   -0.0254    0.0000 C   0  0  0  0  0  0  0  0  0  0  0  0
   10.1309   -0.5115    0.0000 C   0  0  1  0  0  0  0  0  0  0  0  0
   10.4195   -1.9835    0.0000 O   0  0  0  0  0  0  0  0  0  0  0  0
   11.2614    0.4744    0.0000 C   0  0  0  0  0  0  0  0  0  0  0  0
   12.6805   -0.0117    0.0000 C   0  0  0  0  0  0  0  0  0  0  0  0
   13.8109    0.9742    0.0000 C   0  0  0  0  0  0  0  0  0  0  0  0
   13.5224    2.4462    0.0000 C   0  0  0  0  0  0  0  0  0  0  0  0
   12.1033    2.9323    0.0000 C   0  0  0  0  0  0  0  0  0  0  0  0
   10.9728    1.9464    0.0000 C   0  0  0  0  0  0  0  0  0  0  0  0
    5.0318   -1.5112    0.0000 C   0  0  0  0  0  0  0  0  0  0  0  0
    3.6128   -1.0251    0.0000 C   0  0  0  0  0  0  0  0  0  0  0  0
  1  2  1  0  0  0  0
  2  3  1  0  0  0  0
  2  4  1  0  0  0  0
  2  5  1  0  0  0  0
  5  6  1  0  0  0  0
  5  7  1  0  0  0  0
  5 11  1  0  0  0  0
  7  8  1  0  0  0  0
  7  9  1  0  0  0  0
  7 10  1  0  0  0  0
 11 12  1  0  0  0  0
 11 28  2  3  0  0  0
 12 13  2  3  0  0  0
 13 14  1  0  0  0  0
 14 15  1  0  0  0  0
 14 27  2  3  0  0  0
 15 16  1  0  0  0  0
 15 18  1  0  0  0  0
 16 17  1  0  0  0  0
 18 19  1  0  0  0  0
 19 20  1  6  0  0  0
 19 21  1  0  0  0  0
 21 22  1  0  0  0  0
 21 26  2  3  0  0  0
 22 23  2  3  0  0  0
 23 24  1  0  0  0  0
 24 25  2  3  0  0  0
 25 26  1  0  0  0  0
 27 28  1  0  0  0  0
M  END
>  <VC-4>
0.054948311

>  <VC-6>
0.05209782

>  <SPC-4>
8.1278076

>  <SwHBa>
11.555121

>  <SHCsats>
2.6406643

>  <SHother>
5.2587948

>  <SssCH2>
0.43920565

>  <ETA_Shape_Y>
0.19543

>  <ETA_dBetaP>
-0.29464

>  <nAtomP>
7

>  <MDEC-24>
5.3469219

>  <MDEC-33>
1.7710302

>  <MDEC-34>
2.5533195

>  <MLFER_A>
1.11

>  <Classification>
0

$$$$
FC(F)(F)c1c2ncc(C(=O)c3ccccc3)c(c2ccc1)-c1cc(OCc2cc(ccc2)C(=O)[O-])ccc1
  MOE2013           2D

 39 43  0  0  0  0  0  0  0  0999 V2000
    0.0000   -0.0000    0.0000 F   0  0  0  0  0  0  0  0  0  0  0  0
    0.7580   -1.2944    0.0000 C   0  0  0  0  0  0  0  0  0  0  0  0
    2.0524   -0.5365    0.0000 F   0  0  0  0  0  0  0  0  0  0  0  0
   -0.5365   -2.0524    0.0000 F   0  0  0  0  0  0  0  0  0  0  0  0
    1.5159   -2.5888    0.0000 C   0  0  0  0  0  0  0  0  0  0  0  0
    0.7739   -3.8924    0.0000 C   0  0  0  0  0  0  0  0  0  0  0  0
   -0.7261   -3.9016    0.0000 N   0  0  0  0  0  0  0  0  0  0  0  0
   -1.4681   -5.2053    0.0000 C   0  0  0  0  0  0  0  0  0  0  0  0
   -0.7101   -6.4997    0.0000 C   0  0  0  0  0  0  0  0  0  0  0  0
   -1.4521   -7.8033    0.0000 C   0  0  0  0  0  0  0  0  0  0  0  0
   -0.6942   -9.0977    0.0000 O   0  0  0  0  0  0  0  0  0  0  0  0
   -2.9521   -7.8125    0.0000 C   0  0  0  0  0  0  0  0  0  0  0  0
   -3.7101   -6.5181    0.0000 C   0  0  0  0  0  0  0  0  0  0  0  0
   -5.2100   -6.5273    0.0000 C   0  0  0  0  0  0  0  0  0  0  0  0
   -5.9520   -7.8309    0.0000 C   0  0  0  0  0  0  0  0  0  0  0  0
   -5.1941   -9.1253    0.0000 C   0  0  0  0  0  0  0  0  0  0  0  0
   -3.6941   -9.1161    0.0000 C   0  0  0  0  0  0  0  0  0  0  0  0
    0.7899   -6.4905    0.0000 C   0  0  0  0  0  0  0  0  0  0  0  0
    1.5319   -5.1868    0.0000 C   0  0  0  0  0  0  0  0  0  0  0  0
    3.0318   -5.1776    0.0000 C   0  0  0  0  0  0  0  0  0  0  0  0
    3.7738   -3.8740    0.0000 C   0  0  0  0  0  0  0  0  0  0  0  0
    3.0159   -2.5796    0.0000 C   0  0  0  0  0  0  0  0  0  0  0  0
    1.5478   -7.7849    0.0000 C   0  0  0  0  0  0  0  0  0  0  0  0
    3.0478   -7.7757    0.0000 C   0  0  0  0  0  0  0  0  0  0  0  0
    3.8057   -9.0701    0.0000 C   0  0  0  0  0  0  0  0  0  0  0  0
    5.3057   -9.0609    0.0000 O   0  0  0  0  0  0  0  0  0  0  0  0
    6.0637  -10.3553    0.0000 C   0  0  0  0  0  0  0  0  0  0  0  0
    7.5636  -10.3461    0.0000 C   0  0  0  0  0  0  0  0  0  0  0  0
    8.3216  -11.6405    0.0000 C   0  0  0  0  0  0  0  0  0  0  0  0
    9.8216  -11.6313    0.0000 C   0  0  0  0  0  0  0  0  0  0  0  0
   10.5636  -10.3277    0.0000 C   0  0  0  0  0  0  0  0  0  0  0  0
    9.8056   -9.0333    0.0000 C   0  0  0  0  0  0  0  0  0  0  0  0
    8.3057   -9.0425    0.0000 C   0  0  0  0  0  0  0  0  0  0  0  0
   10.5795  -12.9257    0.0000 C   0  0  0  0  0  0  0  0  0  0  0  0
   12.0795  -12.9165    0.0000 O   0  0  0  0  0  0  0  0  0  0  0  0
    9.8375  -14.2293    0.0000 O   0  5  0  0  0  0  0  0  0  0  0  0
    3.0637  -10.3737    0.0000 C   0  0  0  0  0  0  0  0  0  0  0  0
    1.5638  -10.3829    0.0000 C   0  0  0  0  0  0  0  0  0  0  0  0
    0.8058   -9.0885    0.0000 C   0  0  0  0  0  0  0  0  0  0  0  0
  1  2  1  0  0  0  0
  2  3  1  0  0  0  0
  2  4  1  0  0  0  0
  2  5  1  0  0  0  0
  5  6  1  0  0  0  0
  5 22  2  3  0  0  0
  6  7  1  0  0  0  0
  6 19  2  3  0  0  0
  7  8  2  3  0  0  0
  8  9  1  0  0  0  0
  9 10  1  0  0  0  0
  9 18  2  3  0  0  0
 10 11  2  0  0  0  0
 10 12  1  0  0  0  0
 12 13  1  0  0  0  0
 12 17  2  3  0  0  0
 13 14  2  3  0  0  0
 14 15  1  0  0  0  0
 15 16  2  3  0  0  0
 16 17  1  0  0  0  0
 18 19  1  0  0  0  0
 18 23  1  0  0  0  0
 19 20  1  0  0  0  0
 20 21  2  3  0  0  0
 21 22  1  0  0  0  0
 23 24  1  0  0  0  0
 23 39  2  3  0  0  0
 24 25  2  3  0  0  0
 25 26  1  0  0  0  0
 25 37  1  0  0  0  0
 26 27  1  0  0  0  0
 27 28  1  0  0  0  0
 28 29  1  0  0  0  0
 28 33  2  3  0  0  0
 29 30  2  3  0  0  0
 30 31  1  0  0  0  0
 30 34  1  0  0  0  0
 31 32  2  3  0  0  0
 32 33  1  0  0  0  0
 34 35  2  0  0  0  0
 34 36  1  0  0  0  0
 37 38  2  3  0  0  0
 38 39  1  0  0  0  0
M  CHG  1  36  -1
M  END
>  <VC-4>
0.013498731

>  <VC-6>
0.0038967479

>  <SPC-4>
6.7309961

>  <SwHBa>
25.653273

>  <SHCsats>
0

>  <SHother>
10.271228

>  <SssCH2>
0.037392046

>  <ETA_Shape_Y>
0.33166999

>  <ETA_dBetaP>
0

>  <nAtomP>
25

>  <MDEC-24>
2.564919

>  <MDEC-33>
16.040703

>  <MDEC-34>
2.3761799

>  <MLFER_A>
0.24600001

>  <Classification>
0

$$$$
S(=O)(=O)(C)c1cc(Oc2cc(-n3c4c(nc3C)cccc4)ccc2)ccc1
  MOE2013           2D

 27 30  0  0  0  0  0  0  0  0999 V2000
   -0.0000   -0.0000    0.0000 S   0  0  0  0  0  0  0  0  0  0  0  0
    0.7570    1.2950    0.0000 O   0  0  0  0  0  0  0  0  0  0  0  0
   -0.7570   -1.2950    0.0000 O   0  0  0  0  0  0  0  0  0  0  0  0
    1.2950   -0.7570    0.0000 C   0  0  0  0  0  0  0  0  0  0  0  0
   -1.2950    0.7570    0.0000 C   0  0  0  0  0  0  0  0  0  0  0  0
   -2.5980    0.0141    0.0000 C   0  0  0  0  0  0  0  0  0  0  0  0
   -3.8930    0.7711    0.0000 C   0  0  0  0  0  0  0  0  0  0  0  0
   -5.1961    0.0282    0.0000 O   0  0  0  0  0  0  0  0  0  0  0  0
   -6.4910    0.7852    0.0000 C   0  0  0  0  0  0  0  0  0  0  0  0
   -7.7941    0.0422    0.0000 C   0  0  0  0  0  0  0  0  0  0  0  0
   -9.0891    0.7993    0.0000 C   0  0  0  0  0  0  0  0  0  0  0  0
  -10.3922    0.0563    0.0000 N   0  0  0  0  0  0  0  0  0  0  0  0
  -11.7591    0.6738    0.0000 C   0  0  0  0  0  0  0  0  0  0  0  0
  -12.7689   -0.4354    0.0000 C   0  0  0  0  0  0  0  0  0  0  0  0
  -12.0259   -1.7385    0.0000 N   0  0  0  0  0  0  0  0  0  0  0  0
  -10.5570   -1.4346    0.0000 C   0  0  0  0  0  0  0  0  0  0  0  0
   -9.4478   -2.4443    0.0000 C   0  0  0  0  0  0  0  0  0  0  0  0
  -14.2344   -0.1156    0.0000 C   0  0  0  0  0  0  0  0  0  0  0  0
  -14.6902    1.3135    0.0000 C   0  0  0  0  0  0  0  0  0  0  0  0
  -13.6804    2.4227    0.0000 C   0  0  0  0  0  0  0  0  0  0  0  0
  -12.2149    2.1029    0.0000 C   0  0  0  0  0  0  0  0  0  0  0  0
   -9.0809    2.2992    0.0000 C   0  0  0  0  0  0  0  0  0  0  0  0
   -7.7779    3.0422    0.0000 C   0  0  0  0  0  0  0  0  0  0  0  0
   -6.4829    2.2852    0.0000 C   0  0  0  0  0  0  0  0  0  0  0  0
   -3.8849    2.2711    0.0000 C   0  0  0  0  0  0  0  0  0  0  0  0
   -2.5818    3.0140    0.0000 C   0  0  0  0  0  0  0  0  0  0  0  0
   -1.2868    2.2570    0.0000 C   0  0  0  0  0  0  0  0  0  0  0  0
  1  2  2  0  0  0  0
  1  3  2  0  0  0  0
  1  4  1  0  0  0  0
  1  5  1  0  0  0  0
  5  6  1  0  0  0  0
  5 27  2  3  0  0  0
  6  7  2  3  0  0  0
  7  8  1  0  0  0  0
  7 25  1  0  0  0  0
  8  9  1  0  0  0  0
  9 10  1  0  0  0  0
  9 24  2  3  0  0  0
 10 11  2  3  0  0  0
 11 12  1  0  0  0  0
 11 22  1  0  0  0  0
 12 13  1  0  0  0  0
 12 16  1  0  0  0  0
 13 14  1  0  0  0  0
 13 21  2  3  0  0  0
 14 15  1  0  0  0  0
 14 18  2  3  0  0  0
 15 16  2  3  0  0  0
 16 17  1  0  0  0  0
 18 19  1  0  0  0  0
 19 20  2  3  0  0  0
 20 21  1  0  0  0  0
 22 23  2  3  0  0  0
 23 24  1  0  0  0  0
 25 26  2  3  0  0  0
 26 27  1  0  0  0  0
M  END
>  <VC-4>
0.050999172

>  <VC-6>
0.016999723

>  <SPC-4>
4.7815003

>  <SwHBa>
27.647869

>  <SHCsats>
0

>  <SHother>
6.4608526

>  <SssCH2>
0

>  <ETA_Shape_Y>
0.29695001

>  <ETA_dBetaP>
0

>  <nAtomP>
25

>  <MDEC-24>
0

>  <MDEC-33>
5.8659396

>  <MDEC-34>
0

>  <MLFER_A>
0.003

>  <Classification>
1

$$$$
Oc1cc2c(CC[C@H]3[C@](CCC[C@]23C)(C(=O)N[C@@H]2C[C@@H]3C[C@H]([C@H]2C)C3(C)C)C)cc1
  MOE2013           2D

 30 34  0  0  1  0  0  0  0  0999 V2000
    0.0698    0.0600    0.0000 O   0  0  0  0  0  0  0  0  0  0  0  0
   -1.2287   -0.6994    0.0000 C   0  0  0  0  0  0  0  0  0  0  0  0
   -2.5324    0.0315    0.0000 C   0  0  0  0  0  0  0  0  0  0  0  0
   -3.8324   -0.7208    0.0000 C   0  0  0  0  0  0  0  0  0  0  0  0
   -3.8092   -2.2263    0.0000 C   0  0  0  0  0  0  0  0  0  0  0  0
   -5.1000   -2.9899    0.0000 C   0  0  0  0  0  0  0  0  0  0  0  0
   -6.4044   -2.2620    0.0000 C   0  0  0  0  0  0  0  0  0  0  0  0
   -6.4345   -0.7583    0.0000 C   0  0  1  0  0  0  0  0  0  0  0  0
   -7.7524   -0.0402    0.0000 C   0  0  2  0  0  0  0  0  0  0  0  0
   -7.7758    1.4608    0.0000 C   0  0  0  0  0  0  0  0  0  0  0  0
   -6.4888    2.2320    0.0000 C   0  0  0  0  0  0  0  0  0  0  0  0
   -5.1799    1.5121    0.0000 C   0  0  0  0  0  0  0  0  0  0  0  0
   -5.1415    0.0085    0.0000 C   0  0  2  0  0  0  0  0  0  0  0  0
   -3.8675    0.8047    0.0000 C   0  0  0  0  0  0  0  0  0  0  0  0
   -9.2659   -0.0581    0.0000 C   0  0  0  0  0  0  0  0  0  0  0  0
   -9.9834   -1.3911    0.0000 O   0  0  0  0  0  0  0  0  0  0  0  0
  -10.0421    1.2053    0.0000 N   0  0  0  0  0  0  0  0  0  0  0  0
  -11.5855    1.1838    0.0000 C   0  0  2  0  0  0  0  0  0  0  0  0
  -12.3795    0.0764    0.0000 C   0  0  0  0  0  0  0  0  0  0  0  0
  -14.1862    0.3203    0.0000 C   0  0  2  0  0  0  0  0  0  0  0  0
  -14.5928    1.5761    0.0000 C   0  0  0  0  0  0  0  0  0  0  0  0
  -13.6517    2.7021    0.0000 C   0  0  2  0  0  0  0  0  0  0  0  0
  -12.2038    2.6204    0.0000 C   0  0  1  0  0  0  0  0  0  0  0  0
  -11.2828    3.7798    0.0000 C   0  0  0  0  0  0  0  0  0  0  0  0
  -13.1282    1.3044    0.0000 C   0  0  0  0  0  0  0  0  0  0  0  0
  -13.8846   -0.2425    0.0000 C   0  0  0  0  0  0  0  0  0  0  0  0
  -13.0937   -0.2563    0.0000 C   0  0  0  0  0  0  0  0  0  0  0  0
   -8.4620   -1.3599    0.0000 C   0  0  0  0  0  0  0  0  0  0  0  0
   -2.5046   -2.9596    0.0000 C   0  0  0  0  0  0  0  0  0  0  0  0
   -1.2098   -2.2035    0.0000 C   0  0  0  0  0  0  0  0  0  0  0  0
  1  2  1  0  0  0  0
  2  3  1  0  0  0  0
  2 30  2  3  0  0  0
  3  4  2  3  0  0  0
  4  5  1  0  0  0  0
  4 13  1  0  0  0  0
  5  6  1  0  0  0  0
  5 29  2  3  0  0  0
  6  7  1  0  0  0  0
  8  7  1  1  0  0  0
  8  9  1  0  0  0  0
  8 13  1  0  0  0  0
  9 10  1  0  0  0  0
  9 15  1  1  0  0  0
  9 28  1  6  0  0  0
 10 11  1  0  0  0  0
 11 12  1  0  0  0  0
 12 13  1  0  0  0  0
 13 14  1  1  0  0  0
 15 16  2  0  0  0  0
 15 17  1  0  0  0  0
 18 17  1  6  0  0  0
 18 19  1  0  0  0  0
 18 23  1  0  0  0  0
 20 19  1  6  0  0  0
 20 21  1  0  0  0  0
 20 25  1  0  0  0  0
 22 21  1  6  0  0  0
 22 23  1  0  0  0  0
 22 25  1  0  0  0  0
 23 24  1  1  0  0  0
 25 26  1  0  0  0  0
 25 27  1  0  0  0  0
 29 30  1  0  0  0  0
M  END
>  <VC-4>
0.37079081

>  <VC-6>
0.27383962

>  <SPC-4>
9.5545273

>  <SwHBa>
9.1695414

>  <SHCsats>
5.9985619

>  <SHother>
1.2390037

>  <SssCH2>
7.726069

>  <ETA_Shape_Y>
0.30892

>  <ETA_dBetaP>
-0.40000001

>  <nAtomP>
7

>  <MDEC-24>
7.5844893

>  <MDEC-33>
8.9840899

>  <MDEC-34>
8.184721

>  <MLFER_A>
0.91399997

>  <Classification>
0

$$$$
FC(F)(F)c1c2ncc(C(=O)c3ccccc3)c(c2ccc1)-c1cc(OCc2ccc(cc2)[C@@H](Cc2ccccc2)C(=O)[O-])ccc1
  MOE2013           2D

 47 52  0  0  1  0  0  0  0  0999 V2000
    0.0000   -0.0000    0.0000 F   0  0  0  0  0  0  0  0  0  0  0  0
    0.7478   -1.3003    0.0000 C   0  0  0  0  0  0  0  0  0  0  0  0
   -0.5525   -2.0481    0.0000 F   0  0  0  0  0  0  0  0  0  0  0  0
    2.0481   -0.5525    0.0000 F   0  0  0  0  0  0  0  0  0  0  0  0
    1.4956   -2.6006    0.0000 C   0  0  0  0  0  0  0  0  0  0  0  0
    0.7433   -3.8984    0.0000 C   0  0  0  0  0  0  0  0  0  0  0  0
   -0.7567   -3.8958    0.0000 N   0  0  0  0  0  0  0  0  0  0  0  0
   -1.5089   -5.1936    0.0000 C   0  0  0  0  0  0  0  0  0  0  0  0
   -0.7611   -6.4939    0.0000 C   0  0  0  0  0  0  0  0  0  0  0  0
   -1.5133   -7.7917    0.0000 C   0  0  0  0  0  0  0  0  0  0  0  0
   -0.7655   -9.0920    0.0000 O   0  0  0  0  0  0  0  0  0  0  0  0
   -3.0133   -7.7891    0.0000 C   0  0  0  0  0  0  0  0  0  0  0  0
   -3.7611   -6.4888    0.0000 C   0  0  0  0  0  0  0  0  0  0  0  0
   -5.2611   -6.4862    0.0000 C   0  0  0  0  0  0  0  0  0  0  0  0
   -6.0133   -7.7840    0.0000 C   0  0  0  0  0  0  0  0  0  0  0  0
   -5.2655   -9.0843    0.0000 C   0  0  0  0  0  0  0  0  0  0  0  0
   -3.7655   -9.0869    0.0000 C   0  0  0  0  0  0  0  0  0  0  0  0
    0.7389   -6.4965    0.0000 C   0  0  0  0  0  0  0  0  0  0  0  0
    1.4911   -5.1987    0.0000 C   0  0  0  0  0  0  0  0  0  0  0  0
    2.9911   -5.2013    0.0000 C   0  0  0  0  0  0  0  0  0  0  0  0
    3.7433   -3.9035    0.0000 C   0  0  0  0  0  0  0  0  0  0  0  0
    2.9956   -2.6032    0.0000 C   0  0  0  0  0  0  0  0  0  0  0  0
    1.4867   -7.7968    0.0000 C   0  0  0  0  0  0  0  0  0  0  0  0
    2.9867   -7.7993    0.0000 C   0  0  0  0  0  0  0  0  0  0  0  0
    3.7345   -9.0997    0.0000 C   0  0  0  0  0  0  0  0  0  0  0  0
    5.2345   -9.1022    0.0000 O   0  0  0  0  0  0  0  0  0  0  0  0
    5.9823  -10.4025    0.0000 C   0  0  0  0  0  0  0  0  0  0  0  0
    7.4823  -10.4051    0.0000 C   0  0  0  0  0  0  0  0  0  0  0  0
    8.2300  -11.7054    0.0000 C   0  0  0  0  0  0  0  0  0  0  0  0
    9.7300  -11.7080    0.0000 C   0  0  0  0  0  0  0  0  0  0  0  0
   10.4822  -10.4102    0.0000 C   0  0  0  0  0  0  0  0  0  0  0  0
    9.7345   -9.1099    0.0000 C   0  0  0  0  0  0  0  0  0  0  0  0
    8.2345   -9.1073    0.0000 C   0  0  0  0  0  0  0  0  0  0  0  0
   11.9822  -10.4128    0.0000 C   0  0  1  0  0  0  0  0  0  0  0  0
   12.7345   -9.1150    0.0000 C   0  0  0  0  0  0  0  0  0  0  0  0
   14.2345   -9.1176    0.0000 C   0  0  0  0  0  0  0  0  0  0  0  0
   14.9867   -7.8198    0.0000 C   0  0  0  0  0  0  0  0  0  0  0  0
   16.4867   -7.8224    0.0000 C   0  0  0  0  0  0  0  0  0  0  0  0
   17.2345   -9.1227    0.0000 C   0  0  0  0  0  0  0  0  0  0  0  0
   16.4822  -10.4205    0.0000 C   0  0  0  0  0  0  0  0  0  0  0  0
   14.9822  -10.4179    0.0000 C   0  0  0  0  0  0  0  0  0  0  0  0
   12.7300  -11.7131    0.0000 C   0  0  0  0  0  0  0  0  0  0  0  0
   14.2300  -11.7156    0.0000 O   0  0  0  0  0  0  0  0  0  0  0  0
   11.9778  -13.0108    0.0000 O   0  5  0  0  0  0  0  0  0  0  0  0
    2.9823  -10.3974    0.0000 C   0  0  0  0  0  0  0  0  0  0  0  0
    1.4823  -10.3949    0.0000 C   0  0  0  0  0  0  0  0  0  0  0  0
    0.7345   -9.0945    0.0000 C   0  0  0  0  0  0  0  0  0  0  0  0
  1  2  1  0  0  0  0
  2  3  1  0  0  0  0
  2  4  1  0  0  0  0
  2  5  1  0  0  0  0
  5  6  1  0  0  0  0
  5 22  2  3  0  0  0
  6  7  2  3  0  0  0
  6 19  1  0  0  0  0
  7  8  1  0  0  0  0
  8  9  2  3  0  0  0
  9 10  1  0  0  0  0
  9 18  1  0  0  0  0
 10 11  2  0  0  0  0
 10 12  1  0  0  0  0
 12 13  1  0  0  0  0
 12 17  2  3  0  0  0
 13 14  2  3  0  0  0
 14 15  1  0  0  0  0
 15 16  2  3  0  0  0
 16 17  1  0  0  0  0
 18 19  2  3  0  0  0
 18 23  1  0  0  0  0
 19 20  1  0  0  0  0
 20 21  2  3  0  0  0
 21 22  1  0  0  0  0
 23 24  2  3  0  0  0
 23 47  1  0  0  0  0
 24 25  1  0  0  0  0
 25 26  1  0  0  0  0
 25 45  2  3  0  0  0
 26 27  1  0  0  0  0
 27 28  1  0  0  0  0
 28 29  1  0  0  0  0
 28 33  2  3  0  0  0
 29 30  2  3  0  0  0
 30 31  1  0  0  0  0
 31 32  2  3  0  0  0
 32 33  1  0  0  0  0
 34 31  1  1  0  0  0
 34 35  1  0  0  0  0
 34 42  1  0  0  0  0
 35 36  1  0  0  0  0
 36 37  1  0  0  0  0
 36 41  2  3  0  0  0
 37 38  2  3  0  0  0
 38 39  1  0  0  0  0
 39 40  2  3  0  0  0
 40 41  1  0  0  0  0
 42 43  2  0  0  0  0
 42 44  1  0  0  0  0
 45 46  1  0  0  0  0
 46 47  2  3  0  0  0
M  CHG  1  44  -1
M  END
>  <VC-4>
0.013498731

>  <VC-6>
0.0038967479

>  <SPC-4>
7.5663085

>  <SwHBa>
38.22823

>  <SHCsats>
1.5742313

>  <SHother>
12.347705

>  <SssCH2>
0.44271061

>  <ETA_Shape_Y>
0.31687999

>  <ETA_dBetaP>
0

>  <nAtomP>
25

>  <MDEC-24>
2.7389359

>  <MDEC-33>
17.892508

>  <MDEC-34>
2.3361504

>  <MLFER_A>
0.24600001

>  <Classification>
0

$$$$
FC(F)(F)C(O)(C(F)(F)F)c1ccc(N(Cc2ccccc2)CC(F)(F)F)cc1
  MOE2013           2D

 29 30  0  0  1  0  0  0  0  0999 V2000
    0.0000    0.0000    0.0000 F   0  0  0  0  0  0  0  0  0  0  0  0
    0.7447   -1.3021    0.0000 C   0  0  0  0  0  0  0  0  0  0  0  0
   -0.5574   -2.0468    0.0000 F   0  0  0  0  0  0  0  0  0  0  0  0
    2.0468   -0.5574    0.0000 F   0  0  0  0  0  0  0  0  0  0  0  0
    1.4894   -2.6042    0.0000 C   0  0  0  0  0  0  0  0  0  0  0  0
    0.1873   -3.3489    0.0000 O   0  0  0  0  0  0  0  0  0  0  0  0
    2.2340   -3.9063    0.0000 C   0  0  0  0  0  0  0  0  0  0  0  0
    2.9787   -5.2084    0.0000 F   0  0  0  0  0  0  0  0  0  0  0  0
    3.5361   -3.1616    0.0000 F   0  0  0  0  0  0  0  0  0  0  0  0
    0.9319   -4.6510    0.0000 F   0  0  0  0  0  0  0  0  0  0  0  0
    2.7915   -1.8595    0.0000 C   0  0  0  0  0  0  0  0  0  0  0  0
    2.7976   -0.3595    0.0000 C   0  0  0  0  0  0  0  0  0  0  0  0
    4.0997    0.3852    0.0000 C   0  0  0  0  0  0  0  0  0  0  0  0
    5.3956   -0.3701    0.0000 C   0  0  0  0  0  0  0  0  0  0  0  0
    6.6977    0.3745    0.0000 N   0  0  3  0  0  0  0  0  0  0  0  0
    7.9937   -0.3808    0.0000 C   0  0  0  0  0  0  0  0  0  0  0  0
    9.2958    0.3639    0.0000 C   0  0  0  0  0  0  0  0  0  0  0  0
   10.5918   -0.3914    0.0000 C   0  0  0  0  0  0  0  0  0  0  0  0
   11.8938    0.3533    0.0000 C   0  0  0  0  0  0  0  0  0  0  0  0
   11.9000    1.8533    0.0000 C   0  0  0  0  0  0  0  0  0  0  0  0
   10.6040    2.6086    0.0000 C   0  0  0  0  0  0  0  0  0  0  0  0
    9.3019    1.8639    0.0000 C   0  0  0  0  0  0  0  0  0  0  0  0
    6.7039    1.8745    0.0000 C   0  0  0  0  0  0  0  0  0  0  0  0
    5.4079    2.6298    0.0000 C   0  0  0  0  0  0  0  0  0  0  0  0
    6.1632    3.9258    0.0000 F   0  0  0  0  0  0  0  0  0  0  0  0
    4.1120    3.3851    0.0000 F   0  0  0  0  0  0  0  0  0  0  0  0
    4.6526    1.3339    0.0000 F   0  0  0  0  0  0  0  0  0  0  0  0
    5.3895   -1.8701    0.0000 C   0  0  0  0  0  0  0  0  0  0  0  0
    4.0874   -2.6148    0.0000 C   0  0  0  0  0  0  0  0  0  0  0  0
  1  2  1  0  0  0  0
  2  3  1  0  0  0  0
  2  4  1  0  0  0  0
  2  5  1  0  0  0  0
  5  6  1  0  0  0  0
  5  7  1  0  0  0  0
  5 11  1  0  0  0  0
  7  8  1  0  0  0  0
  7  9  1  0  0  0  0
  7 10  1  0  0  0  0
 11 12  1  0  0  0  0
 11 29  2  3  0  0  0
 12 13  2  3  0  0  0
 13 14  1  0  0  0  0
 14 15  1  0  0  0  0
 14 28  2  3  0  0  0
 15 16  1  0  0  0  0
 15 23  1  0  0  0  0
 16 17  1  0  0  0  0
 17 18  1  0  0  0  0
 17 22  2  3  0  0  0
 18 19  2  3  0  0  0
 19 20  1  0  0  0  0
 20 21  2  3  0  0  0
 21 22  1  0  0  0  0
 23 24  1  0  0  0  0
 24 25  1  0  0  0  0
 24 26  1  0  0  0  0
 24 27  1  0  0  0  0
 28 29  1  0  0  0  0
M  END
>  <VC-4>
0.074038401

>  <VC-6>
0.05209782

>  <SPC-4>
8.0737371

>  <SwHBa>
8.3977861

>  <SHCsats>
1.0923243

>  <SHother>
5.824008

>  <SssCH2>
-1.7712731

>  <ETA_Shape_Y>
0.15441

>  <ETA_dBetaP>
-0.31896999

>  <nAtomP>
7

>  <MDEC-24>
8.1152372

>  <MDEC-33>
0.79370052

>  <MDEC-34>
3.0663757

>  <MLFER_A>
0.85399997

>  <Classification>
0

$$$$
FC(F)(F)c1noc2c1ccc(OCCCN(C)c1ccccc1)c2CCC
  MOE2013           2D

 28 30  0  0  1  0  0  0  0  0999 V2000
    0.0000    0.0000    0.0000 F   0  0  0  0  0  0  0  0  0  0  0  0
    0.7522   -1.2978    0.0000 C   0  0  0  0  0  0  0  0  0  0  0  0
    2.0500   -0.5455    0.0000 F   0  0  0  0  0  0  0  0  0  0  0  0
   -0.5455   -2.0500    0.0000 F   0  0  0  0  0  0  0  0  0  0  0  0
    1.5044   -2.5955    0.0000 C   0  0  0  0  0  0  0  0  0  0  0  0
    0.8967   -3.9669    0.0000 N   0  0  0  0  0  0  0  0  0  0  0  0
    2.0131   -4.9687    0.0000 O   0  0  0  0  0  0  0  0  0  0  0  0
    3.3108   -4.2165    0.0000 C   0  0  0  0  0  0  0  0  0  0  0  0
    2.9965   -2.7498    0.0000 C   0  0  0  0  0  0  0  0  0  0  0  0
    4.1095   -1.7442    0.0000 C   0  0  0  0  0  0  0  0  0  0  0  0
    5.5369   -2.2053    0.0000 C   0  0  0  0  0  0  0  0  0  0  0  0
    5.8512   -3.6720    0.0000 C   0  0  0  0  0  0  0  0  0  0  0  0
    7.2786   -4.1331    0.0000 O   0  0  0  0  0  0  0  0  0  0  0  0
    8.3916   -3.1275    0.0000 C   0  0  0  0  0  0  0  0  0  0  0  0
    9.8190   -3.5886    0.0000 C   0  0  0  0  0  0  0  0  0  0  0  0
   10.9320   -2.5830    0.0000 C   0  0  0  0  0  0  0  0  0  0  0  0
   12.3593   -3.0441    0.0000 N   0  0  3  0  0  0  0  0  0  0  0  0
   12.6737   -4.5107    0.0000 C   0  0  0  0  0  0  0  0  0  0  0  0
   13.4724   -2.0385    0.0000 C   0  0  0  0  0  0  0  0  0  0  0  0
   14.8997   -2.4996    0.0000 C   0  0  0  0  0  0  0  0  0  0  0  0
   16.0127   -1.4940    0.0000 C   0  0  0  0  0  0  0  0  0  0  0  0
   15.6984   -0.0273    0.0000 C   0  0  0  0  0  0  0  0  0  0  0  0
   14.2710    0.4338    0.0000 C   0  0  0  0  0  0  0  0  0  0  0  0
   13.1580   -0.5718    0.0000 C   0  0  0  0  0  0  0  0  0  0  0  0
    4.7382   -4.6775    0.0000 C   0  0  0  0  0  0  0  0  0  0  0  0
    5.0526   -6.1442    0.0000 C   0  0  0  0  0  0  0  0  0  0  0  0
    3.9396   -7.1498    0.0000 C   0  0  0  0  0  0  0  0  0  0  0  0
    4.2539   -8.6165    0.0000 C   0  0  0  0  0  0  0  0  0  0  0  0
  1  2  1  0  0  0  0
  2  3  1  0  0  0  0
  2  4  1  0  0  0  0
  2  5  1  0  0  0  0
  5  6  2  3  0  0  0
  5  9  1  0  0  0  0
  6  7  1  0  0  0  0
  7  8  1  0  0  0  0
  8  9  1  0  0  0  0
  8 25  2  3  0  0  0
  9 10  2  3  0  0  0
 10 11  1  0  0  0  0
 11 12  2  3  0  0  0
 12 13  1  0  0  0  0
 12 25  1  0  0  0  0
 13 14  1  0  0  0  0
 14 15  1  0  0  0  0
 15 16  1  0  0  0  0
 16 17  1  0  0  0  0
 17 18  1  0  0  0  0
 17 19  1  0  0  0  0
 19 20  1  0  0  0  0
 19 24  2  3  0  0  0
 20 21  2  3  0  0  0
 21 22  1  0  0  0  0
 22 23  2  3  0  0  0
 23 24  1  0  0  0  0
 25 26  1  0  0  0  0
 26 27  1  0  0  0  0
 27 28  1  0  0  0  0
M  END
>  <VC-4>
0.013498731

>  <VC-6>
0.0030184081

>  <SPC-4>
4.5151939

>  <SwHBa>
14.447221

>  <SHCsats>
3.363163

>  <SHother>
3.6010261

>  <SssCH2>
3.3532853

>  <ETA_Shape_Y>
0.26513001

>  <ETA_dBetaP>
-0.25893

>  <nAtomP>
10

>  <MDEC-24>
1.5132897

>  <MDEC-33>
5.1692352

>  <MDEC-34>
1.811572

>  <MLFER_A>
0.003

>  <Classification>
0

$$$$
FC(F)(F)C(O)(C(F)(F)F)c1ccc(N(Cc2ccccc2)C)cc1
  MOE2013           2D

 25 26  0  0  1  0  0  0  0  0999 V2000
    0.0000    0.0000    0.0000 F   0  0  0  0  0  0  0  0  0  0  0  0
    0.7543   -1.2965    0.0000 C   0  0  0  0  0  0  0  0  0  0  0  0
   -0.5422   -2.0508    0.0000 F   0  0  0  0  0  0  0  0  0  0  0  0
    2.0508   -0.5422    0.0000 F   0  0  0  0  0  0  0  0  0  0  0  0
    1.5086   -2.5931    0.0000 C   0  0  0  0  0  0  0  0  0  0  0  0
    0.2121   -3.3474    0.0000 O   0  0  0  0  0  0  0  0  0  0  0  0
    2.2629   -3.8896    0.0000 C   0  0  0  0  0  0  0  0  0  0  0  0
    3.0172   -5.1862    0.0000 F   0  0  0  0  0  0  0  0  0  0  0  0
    3.5595   -3.1353    0.0000 F   0  0  0  0  0  0  0  0  0  0  0  0
    0.9664   -4.6439    0.0000 F   0  0  0  0  0  0  0  0  0  0  0  0
    2.8052   -1.8388    0.0000 C   0  0  0  0  0  0  0  0  0  0  0  0
    2.8002   -0.3388    0.0000 C   0  0  0  0  0  0  0  0  0  0  0  0
    4.0967    0.4155    0.0000 C   0  0  0  0  0  0  0  0  0  0  0  0
    5.3982   -0.3302    0.0000 C   0  0  0  0  0  0  0  0  0  0  0  0
    6.6948    0.4242    0.0000 N   0  0  3  0  0  0  0  0  0  0  0  0
    7.9963   -0.3215    0.0000 C   0  0  0  0  0  0  0  0  0  0  0  0
    9.2928    0.4328    0.0000 C   0  0  0  0  0  0  0  0  0  0  0  0
   10.5944   -0.3129    0.0000 C   0  0  0  0  0  0  0  0  0  0  0  0
   11.8909    0.4414    0.0000 C   0  0  0  0  0  0  0  0  0  0  0  0
   11.8859    1.9414    0.0000 C   0  0  0  0  0  0  0  0  0  0  0  0
   10.5844    2.6871    0.0000 C   0  0  0  0  0  0  0  0  0  0  0  0
    9.2879    1.9328    0.0000 C   0  0  0  0  0  0  0  0  0  0  0  0
    6.6898    1.9241    0.0000 C   0  0  0  0  0  0  0  0  0  0  0  0
    5.4032   -1.8301    0.0000 C   0  0  0  0  0  0  0  0  0  0  0  0
    4.1067   -2.5845    0.0000 C   0  0  0  0  0  0  0  0  0  0  0  0
  1  2  1  0  0  0  0
  2  3  1  0  0  0  0
  2  4  1  0  0  0  0
  2  5  1  0  0  0  0
  5  6  1  0  0  0  0
  5  7  1  0  0  0  0
  5 11  1  0  0  0  0
  7  8  1  0  0  0  0
  7  9  1  0  0  0  0
  7 10  1  0  0  0  0
 11 12  1  0  0  0  0
 11 25  2  3  0  0  0
 12 13  2  3  0  0  0
 13 14  1  0  0  0  0
 14 15  1  0  0  0  0
 14 24  2  3  0  0  0
 15 16  1  0  0  0  0
 15 23  1  0  0  0  0
 16 17  1  0  0  0  0
 17 18  1  0  0  0  0
 17 22  2  3  0  0  0
 18 19  2  3  0  0  0
 19 20  1  0  0  0  0
 20 21  2  3  0  0  0
 21 22  1  0  0  0  0
 24 25  1  0  0  0  0
M  END
>  <VC-4>
0.054948311

>  <VC-6>
0.05209782

>  <SPC-4>
7.5643353

>  <SwHBa>
12.718496

>  <SHCsats>
0

>  <SHother>
5.2079563

>  <SssCH2>
0.41963908

>  <ETA_Shape_Y>
0.17354999

>  <ETA_dBetaP>
-0.25999999

>  <nAtomP>
7

>  <MDEC-24>
5.1514335

>  <MDEC-33>
0.79370052

>  <MDEC-34>
2.3471363

>  <MLFER_A>
0.85399997

>  <Classification>
0

$$$$
Oc1cc2c(CC[C@H]3[C@](CCC[C@]23C)(C(=O)NCC2(CCCCC2)c2ccccc2)C)cc1
  MOE2013           2D

 33 37  0  0  1  0  0  0  0  0999 V2000
   -0.0000   -0.0000    0.0000 O   0  0  0  0  0  0  0  0  0  0  0  0
   -1.2936    0.7593    0.0000 C   0  0  0  0  0  0  0  0  0  0  0  0
   -2.5980    0.0186    0.0000 C   0  0  0  0  0  0  0  0  0  0  0  0
   -3.8916    0.7780    0.0000 C   0  0  0  0  0  0  0  0  0  0  0  0
   -3.8809    2.2779    0.0000 C   0  0  0  0  0  0  0  0  0  0  0  0
   -5.1745    3.0372    0.0000 C   0  0  0  0  0  0  0  0  0  0  0  0
   -6.4789    2.2966    0.0000 C   0  0  0  0  0  0  0  0  0  0  0  0
   -6.4896    0.7966    0.0000 C   0  0  1  0  0  0  0  0  0  0  0  0
   -7.7940    0.0559    0.0000 C   0  0  2  0  0  0  0  0  0  0  0  0
   -7.8048   -1.4440    0.0000 C   0  0  0  0  0  0  0  0  0  0  0  0
   -6.5112   -2.2033    0.0000 C   0  0  0  0  0  0  0  0  0  0  0  0
   -5.2068   -1.4627    0.0000 C   0  0  0  0  0  0  0  0  0  0  0  0
   -5.1960    0.0373    0.0000 C   0  0  2  0  0  0  0  0  0  0  0  0
   -3.9024   -0.7220    0.0000 C   0  0  0  0  0  0  0  0  0  0  0  0
   -9.2940    0.0667    0.0000 C   0  0  0  0  0  0  0  0  0  0  0  0
  -10.0346    1.3711    0.0000 O   0  0  0  0  0  0  0  0  0  0  0  0
  -10.0533   -1.2269    0.0000 N   0  0  0  0  0  0  0  0  0  0  0  0
  -11.5533   -1.2161    0.0000 C   0  0  0  0  0  0  0  0  0  0  0  0
  -12.3126   -2.5098    0.0000 C   0  0  0  0  0  0  0  0  0  0  0  0
  -13.6169   -3.2504    0.0000 C   0  0  0  0  0  0  0  0  0  0  0  0
  -13.6277   -4.7504    0.0000 C   0  0  0  0  0  0  0  0  0  0  0  0
  -12.3341   -5.5097    0.0000 C   0  0  0  0  0  0  0  0  0  0  0  0
  -11.0297   -4.7690    0.0000 C   0  0  0  0  0  0  0  0  0  0  0  0
  -11.0189   -3.2691    0.0000 C   0  0  0  0  0  0  0  0  0  0  0  0
  -13.0532   -1.2054    0.0000 C   0  0  0  0  0  0  0  0  0  0  0  0
  -14.5532   -1.1946    0.0000 C   0  0  0  0  0  0  0  0  0  0  0  0
  -15.2938    0.1098    0.0000 C   0  0  0  0  0  0  0  0  0  0  0  0
  -14.5345    1.4034    0.0000 C   0  0  0  0  0  0  0  0  0  0  0  0
  -13.0346    1.3926    0.0000 C   0  0  0  0  0  0  0  0  0  0  0  0
  -12.2939    0.0882    0.0000 C   0  0  0  0  0  0  0  0  0  0  0  0
   -8.5347    1.3603    0.0000 C   0  0  0  0  0  0  0  0  0  0  0  0
   -2.5765    3.0186    0.0000 C   0  0  0  0  0  0  0  0  0  0  0  0
   -1.2829    2.2593    0.0000 C   0  0  0  0  0  0  0  0  0  0  0  0
  1  2  1  0  0  0  0
  2  3  1  0  0  0  0
  2 33  2  3  0  0  0
  3  4  2  3  0  0  0
  4  5  1  0  0  0  0
  4 13  1  0  0  0  0
  5  6  1  0  0  0  0
  5 32  2  3  0  0  0
  6  7  1  0  0  0  0
  8  7  1  6  0  0  0
  8  9  1  0  0  0  0
  8 13  1  0  0  0  0
  9 10  1  0  0  0  0
  9 15  1  6  0  0  0
  9 31  1  1  0  0  0
 10 11  1  0  0  0  0
 11 12  1  0  0  0  0
 12 13  1  0  0  0  0
 13 14  1  6  0  0  0
 15 16  2  0  0  0  0
 15 17  1  0  0  0  0
 17 18  1  0  0  0  0
 18 19  1  0  0  0  0
 19 20  1  0  0  0  0
 19 24  1  0  0  0  0
 19 25  1  0  0  0  0
 20 21  1  0  0  0  0
 21 22  1  0  0  0  0
 22 23  1  0  0  0  0
 23 24  1  0  0  0  0
 25 26  1  0  0  0  0
 25 30  2  3  0  0  0
 26 27  2  3  0  0  0
 27 28  1  0  0  0  0
 28 29  2  3  0  0  0
 29 30  1  0  0  0  0
 32 33  1  0  0  0  0
M  END
>  <VC-4>
0.29251251

>  <VC-6>
0.15192768

>  <SPC-4>
7.956305

>  <SwHBa>
21.304386

>  <SHCsats>
5.5711331

>  <SHother>
3.1304634

>  <SssCH2>
11.954239

>  <ETA_Shape_Y>
0.18672

>  <ETA_dBetaP>
-0.27272999

>  <nAtomP>
7

>  <MDEC-24>
13.917068

>  <MDEC-33>
3.8995705

>  <MDEC-34>
6.1023059

>  <MLFER_A>
0.91399997

>  <Classification>
0

$$$$
S(=O)(=O)(C)c1cc(ccc1)-c1ccc(cc1)-c1nc2c(nc1C)c(ccc2)C(F)(F)F
  MOE2013           2D

 31 34  0  0  0  0  0  0  0  0999 V2000
    0.0000   -0.0000    0.0000 S   0  0  0  0  0  0  0  0  0  0  0  0
    0.7496   -1.2993    0.0000 O   0  0  0  0  0  0  0  0  0  0  0  0
   -0.7496    1.2993    0.0000 O   0  0  0  0  0  0  0  0  0  0  0  0
    1.2993    0.7496    0.0000 C   0  0  0  0  0  0  0  0  0  0  0  0
   -1.2993   -0.7496    0.0000 C   0  0  0  0  0  0  0  0  0  0  0  0
   -2.5981    0.0009    0.0000 C   0  0  0  0  0  0  0  0  0  0  0  0
   -3.8974   -0.7487    0.0000 C   0  0  0  0  0  0  0  0  0  0  0  0
   -3.8979   -2.2487    0.0000 C   0  0  0  0  0  0  0  0  0  0  0  0
   -2.5991   -2.9991    0.0000 C   0  0  0  0  0  0  0  0  0  0  0  0
   -1.2998   -2.2496    0.0000 C   0  0  0  0  0  0  0  0  0  0  0  0
   -5.1962    0.0017    0.0000 C   0  0  0  0  0  0  0  0  0  0  0  0
   -6.4954   -0.7479    0.0000 C   0  0  0  0  0  0  0  0  0  0  0  0
   -7.7942    0.0026    0.0000 C   0  0  0  0  0  0  0  0  0  0  0  0
   -7.7937    1.5026    0.0000 C   0  0  0  0  0  0  0  0  0  0  0  0
   -6.4945    2.2521    0.0000 C   0  0  0  0  0  0  0  0  0  0  0  0
   -5.1957    1.5017    0.0000 C   0  0  0  0  0  0  0  0  0  0  0  0
   -9.0925    2.2530    0.0000 C   0  0  0  0  0  0  0  0  0  0  0  0
   -9.0920    3.7530    0.0000 N   0  0  0  0  0  0  0  0  0  0  0  0
  -10.3908    4.5034    0.0000 C   0  0  0  0  0  0  0  0  0  0  0  0
  -11.6901    3.7538    0.0000 C   0  0  0  0  0  0  0  0  0  0  0  0
  -11.6906    2.2538    0.0000 N   0  0  0  0  0  0  0  0  0  0  0  0
  -10.3918    1.5034    0.0000 C   0  0  0  0  0  0  0  0  0  0  0  0
  -10.3923    0.0034    0.0000 C   0  0  0  0  0  0  0  0  0  0  0  0
  -12.9889    4.5043    0.0000 C   0  0  0  0  0  0  0  0  0  0  0  0
  -12.9884    6.0043    0.0000 C   0  0  0  0  0  0  0  0  0  0  0  0
  -11.6891    6.7538    0.0000 C   0  0  0  0  0  0  0  0  0  0  0  0
  -10.3903    6.0034    0.0000 C   0  0  0  0  0  0  0  0  0  0  0  0
  -14.2882    3.7547    0.0000 C   0  0  0  0  0  0  0  0  0  0  0  0
  -15.5875    3.0051    0.0000 F   0  0  0  0  0  0  0  0  0  0  0  0
  -15.0378    5.0540    0.0000 F   0  0  0  0  0  0  0  0  0  0  0  0
  -13.5386    2.4554    0.0000 F   0  0  0  0  0  0  0  0  0  0  0  0
  1  2  2  0  0  0  0
  1  3  2  0  0  0  0
  1  4  1  0  0  0  0
  1  5  1  0  0  0  0
  5  6  1  0  0  0  0
  5 10  2  3  0  0  0
  6  7  2  3  0  0  0
  7  8  1  0  0  0  0
  7 11  1  0  0  0  0
  8  9  2  3  0  0  0
  9 10  1  0  0  0  0
 11 12  1  0  0  0  0
 11 16  2  3  0  0  0
 12 13  2  3  0  0  0
 13 14  1  0  0  0  0
 14 15  2  3  0  0  0
 14 17  1  0  0  0  0
 15 16  1  0  0  0  0
 17 18  1  0  0  0  0
 17 22  2  3  0  0  0
 18 19  2  3  0  0  0
 19 20  1  0  0  0  0
 19 27  1  0  0  0  0
 20 21  2  3  0  0  0
 20 24  1  0  0  0  0
 21 22  1  0  0  0  0
 22 23  1  0  0  0  0
 24 25  2  3  0  0  0
 24 28  1  0  0  0  0
 25 26  1  0  0  0  0
 26 27  2  3  0  0  0
 28 29  1  0  0  0  0
 28 30  1  0  0  0  0
 28 31  1  0  0  0  0
M  END
>  <VC-4>
0.064497903

>  <VC-6>
0.020896472

>  <SPC-4>
6.7203422

>  <SwHBa>
20.685471

>  <SHCsats>
0

>  <SHother>
6.1750975

>  <SssCH2>
0

>  <ETA_Shape_Y>
0.30702001

>  <ETA_dBetaP>
-0.01613

>  <nAtomP>
25

>  <MDEC-24>
1.6193752

>  <MDEC-33>
9.7629805

>  <MDEC-34>
1.9939489

>  <MLFER_A>
0.003

>  <Classification>
1

$$$$
Clc1cc(N(CCCOc2ccc3c(onc3C(F)(F)F)c2CCC)C)ccc1CC(=O)[O-]
  MOE2013           2D

 33 35  0  0  1  0  0  0  0  0999 V2000
    0.0000    0.0000    0.0000 Cl  0  0  0  0  0  0  0  0  0  0  0  0
   -0.0065   -1.5000    0.0000 C   0  0  0  0  0  0  0  0  0  0  0  0
   -1.3088   -2.2443    0.0000 C   0  0  0  0  0  0  0  0  0  0  0  0
   -1.3154   -3.7443    0.0000 C   0  0  0  0  0  0  0  0  0  0  0  0
   -2.6177   -4.4886    0.0000 N   0  0  3  0  0  0  0  0  0  0  0  0
   -3.9134   -3.7330    0.0000 C   0  0  0  0  0  0  0  0  0  0  0  0
   -5.2157   -4.4773    0.0000 C   0  0  0  0  0  0  0  0  0  0  0  0
   -6.5115   -3.7217    0.0000 C   0  0  0  0  0  0  0  0  0  0  0  0
   -7.8138   -4.4660    0.0000 O   0  0  0  0  0  0  0  0  0  0  0  0
   -9.1095   -3.7104    0.0000 C   0  0  0  0  0  0  0  0  0  0  0  0
   -9.1030   -2.2104    0.0000 C   0  0  0  0  0  0  0  0  0  0  0  0
  -10.3987   -1.4547    0.0000 C   0  0  0  0  0  0  0  0  0  0  0  0
  -11.7010   -2.1991    0.0000 C   0  0  0  0  0  0  0  0  0  0  0  0
  -11.7076   -3.6990    0.0000 C   0  0  0  0  0  0  0  0  0  0  0  0
  -13.1362   -4.1563    0.0000 O   0  0  0  0  0  0  0  0  0  0  0  0
  -14.0125   -2.9390    0.0000 N   0  0  0  0  0  0  0  0  0  0  0  0
  -13.1256   -1.7293    0.0000 C   0  0  0  0  0  0  0  0  0  0  0  0
  -13.5829   -0.3007    0.0000 C   0  0  0  0  0  0  0  0  0  0  0  0
  -12.1543    0.1566    0.0000 F   0  0  0  0  0  0  0  0  0  0  0  0
  -15.0115   -0.7580    0.0000 F   0  0  0  0  0  0  0  0  0  0  0  0
  -14.0402    1.1279    0.0000 F   0  0  0  0  0  0  0  0  0  0  0  0
  -10.4118   -4.4547    0.0000 C   0  0  0  0  0  0  0  0  0  0  0  0
  -10.4183   -5.9547    0.0000 C   0  0  0  0  0  0  0  0  0  0  0  0
  -11.7206   -6.6990    0.0000 C   0  0  0  0  0  0  0  0  0  0  0  0
  -11.7272   -8.1990    0.0000 C   0  0  0  0  0  0  0  0  0  0  0  0
   -2.6242   -5.9886    0.0000 C   0  0  0  0  0  0  0  0  0  0  0  0
   -0.0196   -4.5000    0.0000 C   0  0  0  0  0  0  0  0  0  0  0  0
    1.2827   -3.7556    0.0000 C   0  0  0  0  0  0  0  0  0  0  0  0
    1.2892   -2.2556    0.0000 C   0  0  0  0  0  0  0  0  0  0  0  0
    2.5915   -1.5113    0.0000 C   0  0  0  0  0  0  0  0  0  0  0  0
    3.8873   -2.2670    0.0000 C   0  0  0  0  0  0  0  0  0  0  0  0
    3.8807   -3.7669    0.0000 O   0  0  0  0  0  0  0  0  0  0  0  0
    5.1896   -1.5226    0.0000 O   0  5  0  0  0  0  0  0  0  0  0  0
  1  2  1  0  0  0  0
  2  3  1  0  0  0  0
  2 29  2  3  0  0  0
  3  4  2  3  0  0  0
  4  5  1  0  0  0  0
  4 27  1  0  0  0  0
  5  6  1  0  0  0  0
  5 26  1  0  0  0  0
  6  7  1  0  0  0  0
  7  8  1  0  0  0  0
  8  9  1  0  0  0  0
  9 10  1  0  0  0  0
 10 11  1  0  0  0  0
 10 22  2  3  0  0  0
 11 12  2  3  0  0  0
 12 13  1  0  0  0  0
 13 14  2  3  0  0  0
 13 17  1  0  0  0  0
 14 15  1  0  0  0  0
 14 22  1  0  0  0  0
 15 16  1  0  0  0  0
 16 17  2  3  0  0  0
 17 18  1  0  0  0  0
 18 19  1  0  0  0  0
 18 20  1  0  0  0  0
 18 21  1  0  0  0  0
 22 23  1  0  0  0  0
 23 24  1  0  0  0  0
 24 25  1  0  0  0  0
 27 28  2  3  0  0  0
 28 29  1  0  0  0  0
 29 30  1  0  0  0  0
 30 31  1  0  0  0  0
 31 32  2  0  0  0  0
 31 33  1  0  0  0  0
M  CHG  1  33  -1
M  END
>  <VC-4>
0.013498731

>  <VC-6>
0.0030184081

>  <SPC-4>
5.6972799

>  <SwHBa>
10.482901

>  <SHCsats>
3.4800525

>  <SHother>
2.7601609

>  <SssCH2>
2.9082735

>  <ETA_Shape_Y>
0.32227001

>  <ETA_dBetaP>
-0.27272999

>  <nAtomP>
10

>  <MDEC-24>
1.4418707

>  <MDEC-33>
7.313374

>  <MDEC-34>
1.6695596

>  <MLFER_A>
0.24600001

>  <Classification>
0

$$$$
Clc1c(cccc1C(F)(F)F)COc1cc(ccc1)-c1c2c(nnc1Cc1ccccc1)c(ccc2)C(F)(F)F
  MOE2013           2D

 40 44  0  0  0  0  0  0  0  0999 V2000
   -0.0000   -0.0000    0.0000 Cl  0  0  0  0  0  0  0  0  0  0  0  0
   -0.7573    1.2948    0.0000 C   0  0  0  0  0  0  0  0  0  0  0  0
   -2.2573    1.2863    0.0000 C   0  0  0  0  0  0  0  0  0  0  0  0
   -3.0146    2.5811    0.0000 C   0  0  0  0  0  0  0  0  0  0  0  0
   -2.2720    3.8843    0.0000 C   0  0  0  0  0  0  0  0  0  0  0  0
   -0.7720    3.8928    0.0000 C   0  0  0  0  0  0  0  0  0  0  0  0
   -0.0147    2.5980    0.0000 C   0  0  0  0  0  0  0  0  0  0  0  0
    1.4853    2.6065    0.0000 C   0  0  0  0  0  0  0  0  0  0  0  0
    2.9853    2.6150    0.0000 F   0  0  0  0  0  0  0  0  0  0  0  0
    1.4768    4.1065    0.0000 F   0  0  0  0  0  0  0  0  0  0  0  0
    1.4938    1.1065    0.0000 F   0  0  0  0  0  0  0  0  0  0  0  0
   -3.0000   -0.0170    0.0000 C   0  0  0  0  0  0  0  0  0  0  0  0
   -4.4999   -0.0254    0.0000 O   0  0  0  0  0  0  0  0  0  0  0  0
   -5.2426   -1.3287    0.0000 C   0  0  0  0  0  0  0  0  0  0  0  0
   -6.7425   -1.3372    0.0000 C   0  0  0  0  0  0  0  0  0  0  0  0
   -7.4852   -2.6404    0.0000 C   0  0  0  0  0  0  0  0  0  0  0  0
   -6.7279   -3.9352    0.0000 C   0  0  0  0  0  0  0  0  0  0  0  0
   -5.2279   -3.9267    0.0000 C   0  0  0  0  0  0  0  0  0  0  0  0
   -4.4852   -2.6235    0.0000 C   0  0  0  0  0  0  0  0  0  0  0  0
   -8.9852   -2.6489    0.0000 C   0  0  0  0  0  0  0  0  0  0  0  0
   -9.7425   -1.3541    0.0000 C   0  0  0  0  0  0  0  0  0  0  0  0
  -11.2425   -1.3626    0.0000 C   0  0  0  0  0  0  0  0  0  0  0  0
  -11.9851   -2.6659    0.0000 N   0  0  0  0  0  0  0  0  0  0  0  0
  -11.2278   -3.9607    0.0000 N   0  0  0  0  0  0  0  0  0  0  0  0
   -9.7278   -3.9522    0.0000 C   0  0  0  0  0  0  0  0  0  0  0  0
   -8.9705   -5.2470    0.0000 C   0  0  0  0  0  0  0  0  0  0  0  0
   -9.7131   -6.5502    0.0000 C   0  0  0  0  0  0  0  0  0  0  0  0
   -8.9558   -7.8450    0.0000 C   0  0  0  0  0  0  0  0  0  0  0  0
   -9.6984   -9.1482    0.0000 C   0  0  0  0  0  0  0  0  0  0  0  0
  -11.1984   -9.1567    0.0000 C   0  0  0  0  0  0  0  0  0  0  0  0
  -11.9557   -7.8620    0.0000 C   0  0  0  0  0  0  0  0  0  0  0  0
  -11.2131   -6.5587    0.0000 C   0  0  0  0  0  0  0  0  0  0  0  0
  -11.9998   -0.0678    0.0000 C   0  0  0  0  0  0  0  0  0  0  0  0
  -11.2572    1.2354    0.0000 C   0  0  0  0  0  0  0  0  0  0  0  0
   -9.7572    1.2439    0.0000 C   0  0  0  0  0  0  0  0  0  0  0  0
   -8.9999   -0.0509    0.0000 C   0  0  0  0  0  0  0  0  0  0  0  0
  -13.4998   -0.0763    0.0000 C   0  0  0  0  0  0  0  0  0  0  0  0
  -13.4913   -1.5763    0.0000 F   0  0  0  0  0  0  0  0  0  0  0  0
  -14.9998   -0.0848    0.0000 F   0  0  0  0  0  0  0  0  0  0  0  0
  -13.5083    1.4236    0.0000 F   0  0  0  0  0  0  0  0  0  0  0  0
  1  2  1  0  0  0  0
  2  3  1  0  0  0  0
  2  7  2  3  0  0  0
  3  4  2  3  0  0  0
  3 12  1  0  0  0  0
  4  5  1  0  0  0  0
  5  6  2  3  0  0  0
  6  7  1  0  0  0  0
  7  8  1  0  0  0  0
  8  9  1  0  0  0  0
  8 10  1  0  0  0  0
  8 11  1  0  0  0  0
 12 13  1  0  0  0  0
 13 14  1  0  0  0  0
 14 15  1  0  0  0  0
 14 19  2  3  0  0  0
 15 16  2  3  0  0  0
 16 17  1  0  0  0  0
 16 20  1  0  0  0  0
 17 18  2  3  0  0  0
 18 19  1  0  0  0  0
 20 21  1  0  0  0  0
 20 25  2  3  0  0  0
 21 22  1  0  0  0  0
 21 36  2  3  0  0  0
 22 23  1  0  0  0  0
 22 33  2  3  0  0  0
 23 24  2  3  0  0  0
 24 25  1  0  0  0  0
 25 26  1  0  0  0  0
 26 27  1  0  0  0  0
 27 28  1  0  0  0  0
 27 32  2  3  0  0  0
 28 29  2  3  0  0  0
 29 30  1  0  0  0  0
 30 31  2  3  0  0  0
 31 32  1  0  0  0  0
 33 34  1  0  0  0  0
 33 37  1  0  0  0  0
 34 35  2  3  0  0  0
 35 36  1  0  0  0  0
 37 38  1  0  0  0  0
 37 39  1  0  0  0  0
 37 40  1  0  0  0  0
M  END
>  <VC-4>
0.026997462

>  <VC-6>
0.0077934959

>  <SPC-4>
7.3853812

>  <SwHBa>
25.93943

>  <SHCsats>
0

>  <SHother>
8.7426071

>  <SssCH2>
0.24820422

>  <ETA_Shape_Y>
0.29631001

>  <ETA_dBetaP>
-0.09375

>  <nAtomP>
17

>  <MDEC-24>
4.4978175

>  <MDEC-33>
13.804522

>  <MDEC-34>
4.036026

>  <MLFER_A>
0.003

>  <Classification>
1

$$$$
FC(F)(F)C(O)(C(F)(F)F)c1ccc(N([C@@H](CO)c2ccccc2)CC)cc1
  MOE2013           2D

 28 29  0  0  1  0  0  0  0  0999 V2000
    0.0000   -0.0000    0.0000 F   0  0  0  0  0  0  0  0  0  0  0  0
   -0.7419   -1.3037    0.0000 C   0  0  0  0  0  0  0  0  0  0  0  0
   -2.0456   -0.5617    0.0000 F   0  0  0  0  0  0  0  0  0  0  0  0
    0.5617   -2.0456    0.0000 F   0  0  0  0  0  0  0  0  0  0  0  0
   -1.4839   -2.6073    0.0000 C   0  0  0  0  0  0  0  0  0  0  0  0
   -2.7875   -1.8654    0.0000 O   0  0  0  0  0  0  0  0  0  0  0  0
   -2.2258   -3.9110    0.0000 C   0  0  0  0  0  0  0  0  0  0  0  0
   -2.9678   -5.2146    0.0000 F   0  0  0  0  0  0  0  0  0  0  0  0
   -3.5295   -3.1690    0.0000 F   0  0  0  0  0  0  0  0  0  0  0  0
   -0.9222   -4.6529    0.0000 F   0  0  0  0  0  0  0  0  0  0  0  0
   -0.1802   -3.3493    0.0000 C   0  0  0  0  0  0  0  0  0  0  0  0
    1.1141   -2.5912    0.0000 C   0  0  0  0  0  0  0  0  0  0  0  0
    2.4178   -3.3332    0.0000 C   0  0  0  0  0  0  0  0  0  0  0  0
    2.4271   -4.8331    0.0000 C   0  0  0  0  0  0  0  0  0  0  0  0
    3.7307   -5.5751    0.0000 N   0  0  3  0  0  0  0  0  0  0  0  0
    5.0251   -4.8171    0.0000 C   0  0  1  0  0  0  0  0  0  0  0  0
    5.0158   -3.3171    0.0000 C   0  0  0  0  0  0  0  0  0  0  0  0
    6.3102   -2.5591    0.0000 O   0  0  0  0  0  0  0  0  0  0  0  0
    6.3288   -5.5590    0.0000 C   0  0  0  0  0  0  0  0  0  0  0  0
    7.6231   -4.8010    0.0000 C   0  0  0  0  0  0  0  0  0  0  0  0
    8.9268   -5.5429    0.0000 C   0  0  0  0  0  0  0  0  0  0  0  0
    8.9361   -7.0429    0.0000 C   0  0  0  0  0  0  0  0  0  0  0  0
    7.6417   -7.8009    0.0000 C   0  0  0  0  0  0  0  0  0  0  0  0
    6.3381   -7.0590    0.0000 C   0  0  0  0  0  0  0  0  0  0  0  0
    3.7400   -7.0751    0.0000 C   0  0  0  0  0  0  0  0  0  0  0  0
    2.4457   -7.8331    0.0000 C   0  0  0  0  0  0  0  0  0  0  0  0
    1.1327   -5.5912    0.0000 C   0  0  0  0  0  0  0  0  0  0  0  0
   -0.1709   -4.8492    0.0000 C   0  0  0  0  0  0  0  0  0  0  0  0
  1  2  1  0  0  0  0
  2  3  1  0  0  0  0
  2  4  1  0  0  0  0
  2  5  1  0  0  0  0
  5  6  1  0  0  0  0
  5  7  1  0  0  0  0
  5 11  1  0  0  0  0
  7  8  1  0  0  0  0
  7  9  1  0  0  0  0
  7 10  1  0  0  0  0
 11 12  1  0  0  0  0
 11 28  2  3  0  0  0
 12 13  2  3  0  0  0
 13 14  1  0  0  0  0
 14 15  1  0  0  0  0
 14 27  2  3  0  0  0
 15 25  1  0  0  0  0
 16 15  1  1  0  0  0
 16 17  1  0  0  0  0
 16 19  1  0  0  0  0
 17 18  1  0  0  0  0
 19 20  1  0  0  0  0
 19 24  2  3  0  0  0
 20 21  2  3  0  0  0
 21 22  1  0  0  0  0
 22 23  2  3  0  0  0
 23 24  1  0  0  0  0
 25 26  1  0  0  0  0
 27 28  1  0  0  0  0
M  END
>  <VC-4>
0.054948311

>  <VC-6>
0.05209782

>  <SPC-4>
8.0743809

>  <SwHBa>
11.817508

>  <SHCsats>
2.6672328

>  <SHother>
5.2432365

>  <SssCH2>
0.024723835

>  <ETA_Shape_Y>
0.19543

>  <ETA_dBetaP>
-0.29464

>  <nAtomP>
7

>  <MDEC-24>
5.527669

>  <MDEC-33>
2.1025789

>  <MDEC-34>
2.7271402

>  <MLFER_A>
1.11

>  <Classification>
0

$$$$
S(=O)(=O)(C(C)C)c1cc(Oc2cc(ccc2)-c2c3c(ncc2)c(ccc3)C(F)(F)F)ccc1
  MOE2013           2D

 33 36  0  0  0  0  0  0  0  0999 V2000
    0.0000    0.0000    0.0000 S   0  0  0  0  0  0  0  0  0  0  0  0
   -0.7448   -1.3021    0.0000 O   0  0  0  0  0  0  0  0  0  0  0  0
    0.7448    1.3021    0.0000 O   0  0  0  0  0  0  0  0  0  0  0  0
    1.3021   -0.7448    0.0000 C   0  0  0  0  0  0  0  0  0  0  0  0
    1.3081   -2.2447    0.0000 C   0  0  0  0  0  0  0  0  0  0  0  0
    2.5981    0.0105    0.0000 C   0  0  0  0  0  0  0  0  0  0  0  0
   -1.3021    0.7448    0.0000 C   0  0  0  0  0  0  0  0  0  0  0  0
   -2.5981   -0.0105    0.0000 C   0  0  0  0  0  0  0  0  0  0  0  0
   -3.9001    0.7343    0.0000 C   0  0  0  0  0  0  0  0  0  0  0  0
   -5.1961   -0.0210    0.0000 O   0  0  0  0  0  0  0  0  0  0  0  0
   -6.4982    0.7238    0.0000 C   0  0  0  0  0  0  0  0  0  0  0  0
   -7.7942   -0.0314    0.0000 C   0  0  0  0  0  0  0  0  0  0  0  0
   -9.0962    0.7133    0.0000 C   0  0  0  0  0  0  0  0  0  0  0  0
   -9.1023    2.2133    0.0000 C   0  0  0  0  0  0  0  0  0  0  0  0
   -7.8063    2.9685    0.0000 C   0  0  0  0  0  0  0  0  0  0  0  0
   -6.5042    2.2238    0.0000 C   0  0  0  0  0  0  0  0  0  0  0  0
  -10.3922   -0.0419    0.0000 C   0  0  0  0  0  0  0  0  0  0  0  0
  -11.6943    0.7028    0.0000 C   0  0  0  0  0  0  0  0  0  0  0  0
  -12.9903   -0.0524    0.0000 C   0  0  0  0  0  0  0  0  0  0  0  0
  -12.9842   -1.5524    0.0000 N   0  0  0  0  0  0  0  0  0  0  0  0
  -11.6822   -2.2971    0.0000 C   0  0  0  0  0  0  0  0  0  0  0  0
  -10.3862   -1.5419    0.0000 C   0  0  0  0  0  0  0  0  0  0  0  0
  -14.2923    0.6924    0.0000 C   0  0  0  0  0  0  0  0  0  0  0  0
  -14.2984    2.1924    0.0000 C   0  0  0  0  0  0  0  0  0  0  0  0
  -13.0024    2.9476    0.0000 C   0  0  0  0  0  0  0  0  0  0  0  0
  -11.7003    2.2028    0.0000 C   0  0  0  0  0  0  0  0  0  0  0  0
  -15.5883   -0.0629    0.0000 C   0  0  0  0  0  0  0  0  0  0  0  0
  -16.3436    1.2331    0.0000 F   0  0  0  0  0  0  0  0  0  0  0  0
  -16.8843   -0.8181    0.0000 F   0  0  0  0  0  0  0  0  0  0  0  0
  -14.8331   -1.3589    0.0000 F   0  0  0  0  0  0  0  0  0  0  0  0
   -3.9062    2.2343    0.0000 C   0  0  0  0  0  0  0  0  0  0  0  0
   -2.6102    2.9895    0.0000 C   0  0  0  0  0  0  0  0  0  0  0  0
   -1.3081    2.2447    0.0000 C   0  0  0  0  0  0  0  0  0  0  0  0
  1  2  2  0  0  0  0
  1  3  2  0  0  0  0
  1  4  1  0  0  0  0
  1  7  1  0  0  0  0
  4  5  1  0  0  0  0
  4  6  1  0  0  0  0
  7  8  1  0  0  0  0
  7 33  2  3  0  0  0
  8  9  2  3  0  0  0
  9 10  1  0  0  0  0
  9 31  1  0  0  0  0
 10 11  1  0  0  0  0
 11 12  1  0  0  0  0
 11 16  2  3  0  0  0
 12 13  2  3  0  0  0
 13 14  1  0  0  0  0
 13 17  1  0  0  0  0
 14 15  2  3  0  0  0
 15 16  1  0  0  0  0
 17 18  1  0  0  0  0
 17 22  2  3  0  0  0
 18 19  1  0  0  0  0
 18 26  2  3  0  0  0
 19 20  1  0  0  0  0
 19 23  2  3  0  0  0
 20 21  2  3  0  0  0
 21 22  1  0  0  0  0
 23 24  1  0  0  0  0
 23 27  1  0  0  0  0
 24 25  2  3  0  0  0
 25 26  1  0  0  0  0
 27 28  1  0  0  0  0
 27 29  1  0  0  0  0
 27 30  1  0  0  0  0
 31 32  2  3  0  0  0
 32 33  1  0  0  0  0
M  END
>  <VC-4>
0.042943116

>  <VC-6>
0.043155927

>  <SPC-4>
7.6585178

>  <SwHBa>
22.132021

>  <SHCsats>
1.4456551

>  <SHother>
7.7256117

>  <SssCH2>
0

>  <ETA_Shape_Y>
0.28863999

>  <ETA_dBetaP>
-0.045449998

>  <nAtomP>
26

>  <MDEC-24>
2.1703773

>  <MDEC-33>
9.1078358

>  <MDEC-34>
1.9222677

>  <MLFER_A>
0.003

>  <Classification>
0

$$$$
FC(F)(F)c1noc2c1ccc(OCCCn1nnc3cc(ccc13)CC(=O)[O-])c2CCC
  MOE2013           2D

 33 36  0  0  0  0  0  0  0  0999 V2000
    0.0000    0.0000    0.0000 F   0  0  0  0  0  0  0  0  0  0  0  0
    0.7569   -1.2951    0.0000 C   0  0  0  0  0  0  0  0  0  0  0  0
    2.0519   -0.5382    0.0000 F   0  0  0  0  0  0  0  0  0  0  0  0
   -0.5382   -2.0519    0.0000 F   0  0  0  0  0  0  0  0  0  0  0  0
    1.5137   -2.5901    0.0000 C   0  0  0  0  0  0  0  0  0  0  0  0
    0.9108   -3.9636    0.0000 N   0  0  0  0  0  0  0  0  0  0  0  0
    2.0308   -4.9614    0.0000 O   0  0  0  0  0  0  0  0  0  0  0  0
    3.3259   -4.2046    0.0000 C   0  0  0  0  0  0  0  0  0  0  0  0
    3.0063   -2.7390    0.0000 C   0  0  0  0  0  0  0  0  0  0  0  0
    4.1157   -1.7295    0.0000 C   0  0  0  0  0  0  0  0  0  0  0  0
    5.5447   -2.1854    0.0000 C   0  0  0  0  0  0  0  0  0  0  0  0
    5.8643   -3.6510    0.0000 C   0  0  0  0  0  0  0  0  0  0  0  0
    7.2933   -4.1070    0.0000 O   0  0  0  0  0  0  0  0  0  0  0  0
    8.4027   -3.0974    0.0000 C   0  0  0  0  0  0  0  0  0  0  0  0
    9.8317   -3.5534    0.0000 C   0  0  0  0  0  0  0  0  0  0  0  0
   10.9411   -2.5438    0.0000 C   0  0  0  0  0  0  0  0  0  0  0  0
   12.3702   -2.9998    0.0000 N   0  0  0  0  0  0  0  0  0  0  0  0
   12.8412   -4.4239    0.0000 N   0  0  0  0  0  0  0  0  0  0  0  0
   14.3412   -4.4160    0.0000 N   0  0  0  0  0  0  0  0  0  0  0  0
   14.7972   -2.9870    0.0000 C   0  0  0  0  0  0  0  0  0  0  0  0
   16.1643   -2.3697    0.0000 C   0  0  0  0  0  0  0  0  0  0  0  0
   16.3132   -0.8771    0.0000 C   0  0  0  0  0  0  0  0  0  0  0  0
   15.0950   -0.0018    0.0000 C   0  0  0  0  0  0  0  0  0  0  0  0
   13.7279   -0.6191    0.0000 C   0  0  0  0  0  0  0  0  0  0  0  0
   13.5790   -2.1117    0.0000 C   0  0  0  0  0  0  0  0  0  0  0  0
   17.6802   -0.2597    0.0000 C   0  0  0  0  0  0  0  0  0  0  0  0
   17.8292    1.2329    0.0000 C   0  0  0  0  0  0  0  0  0  0  0  0
   16.6110    2.1081    0.0000 O   0  0  0  0  0  0  0  0  0  0  0  0
   19.1962    1.8502    0.0000 O   0  5  0  0  0  0  0  0  0  0  0  0
    4.7549   -4.6606    0.0000 C   0  0  0  0  0  0  0  0  0  0  0  0
    5.0745   -6.1261    0.0000 C   0  0  0  0  0  0  0  0  0  0  0  0
    3.9651   -7.1357    0.0000 C   0  0  0  0  0  0  0  0  0  0  0  0
    4.2847   -8.6012    0.0000 C   0  0  0  0  0  0  0  0  0  0  0  0
  1  2  1  0  0  0  0
  2  3  1  0  0  0  0
  2  4  1  0  0  0  0
  2  5  1  0  0  0  0
  5  6  2  3  0  0  0
  5  9  1  0  0  0  0
  6  7  1  0  0  0  0
  7  8  1  0  0  0  0
  8  9  1  0  0  0  0
  8 30  2  3  0  0  0
  9 10  2  3  0  0  0
 10 11  1  0  0  0  0
 11 12  2  3  0  0  0
 12 13  1  0  0  0  0
 12 30  1  0  0  0  0
 13 14  1  0  0  0  0
 14 15  1  0  0  0  0
 15 16  1  0  0  0  0
 16 17  1  0  0  0  0
 17 18  1  0  0  0  0
 17 25  1  0  0  0  0
 18 19  2  3  0  0  0
 19 20  1  0  0  0  0
 20 21  1  0  0  0  0
 20 25  2  3  0  0  0
 21 22  2  3  0  0  0
 22 23  1  0  0  0  0
 22 26  1  0  0  0  0
 23 24  2  3  0  0  0
 24 25  1  0  0  0  0
 26 27  1  0  0  0  0
 27 28  2  0  0  0  0
 27 29  1  0  0  0  0
 30 31  1  0  0  0  0
 31 32  1  0  0  0  0
 32 33  1  0  0  0  0
M  CHG  1  29  -1
M  END
>  <VC-4>
0.013498731

>  <VC-6>
0.0030184081

>  <SPC-4>
5.4697719

>  <SwHBa>
8.6818552

>  <SHCsats>
3.7818525

>  <SHother>
3.0900517

>  <SssCH2>
2.3354089

>  <ETA_Shape_Y>
0.33129001

>  <ETA_dBetaP>
-0.23485

>  <nAtomP>
10

>  <MDEC-24>
1.4314169

>  <MDEC-33>
7.3646069

>  <MDEC-34>
1.6844742

>  <MLFER_A>
0.24600001

>  <Classification>
0

$$$$
S(=O)(=O)(C)c1cc(ccc1)-c1cc(ccc1)-c1c2c(ncc1)c(ccc2)C(F)(F)F
  MOE2013           2D

 30 33  0  0  0  0  0  0  0  0999 V2000
   -0.0000   -0.0000    0.0000 S   0  0  0  0  0  0  0  0  0  0  0  0
    0.7582    1.2943    0.0000 O   0  0  0  0  0  0  0  0  0  0  0  0
   -0.7582   -1.2943    0.0000 O   0  0  0  0  0  0  0  0  0  0  0  0
    1.2943   -0.7582    0.0000 C   0  0  0  0  0  0  0  0  0  0  0  0
   -1.2943    0.7582    0.0000 C   0  0  0  0  0  0  0  0  0  0  0  0
   -2.5980    0.0165    0.0000 C   0  0  0  0  0  0  0  0  0  0  0  0
   -3.8923    0.7747    0.0000 C   0  0  0  0  0  0  0  0  0  0  0  0
   -3.8828    2.2747    0.0000 C   0  0  0  0  0  0  0  0  0  0  0  0
   -2.5790    3.0164    0.0000 C   0  0  0  0  0  0  0  0  0  0  0  0
   -1.2847    2.2582    0.0000 C   0  0  0  0  0  0  0  0  0  0  0  0
   -5.1960    0.0329    0.0000 C   0  0  0  0  0  0  0  0  0  0  0  0
   -6.4903    0.7912    0.0000 C   0  0  0  0  0  0  0  0  0  0  0  0
   -7.7941    0.0494    0.0000 C   0  0  0  0  0  0  0  0  0  0  0  0
   -7.8036   -1.4506    0.0000 C   0  0  0  0  0  0  0  0  0  0  0  0
   -6.5093   -2.2088    0.0000 C   0  0  0  0  0  0  0  0  0  0  0  0
   -5.2056   -1.4670    0.0000 C   0  0  0  0  0  0  0  0  0  0  0  0
   -9.0883    0.8076    0.0000 C   0  0  0  0  0  0  0  0  0  0  0  0
  -10.3921    0.0659    0.0000 C   0  0  0  0  0  0  0  0  0  0  0  0
  -11.6864    0.8241    0.0000 C   0  0  0  0  0  0  0  0  0  0  0  0
  -11.6768    2.3241    0.0000 N   0  0  0  0  0  0  0  0  0  0  0  0
  -10.3731    3.0658    0.0000 C   0  0  0  0  0  0  0  0  0  0  0  0
   -9.0788    2.3076    0.0000 C   0  0  0  0  0  0  0  0  0  0  0  0
  -12.9901    0.0824    0.0000 C   0  0  0  0  0  0  0  0  0  0  0  0
  -12.9996   -1.4176    0.0000 C   0  0  0  0  0  0  0  0  0  0  0  0
  -11.7054   -2.1758    0.0000 C   0  0  0  0  0  0  0  0  0  0  0  0
  -10.4016   -1.4341    0.0000 C   0  0  0  0  0  0  0  0  0  0  0  0
  -14.2844    0.8406    0.0000 C   0  0  0  0  0  0  0  0  0  0  0  0
  -15.5786    1.5988    0.0000 F   0  0  0  0  0  0  0  0  0  0  0  0
  -15.0426   -0.4537    0.0000 F   0  0  0  0  0  0  0  0  0  0  0  0
  -13.5262    2.1348    0.0000 F   0  0  0  0  0  0  0  0  0  0  0  0
  1  2  2  0  0  0  0
  1  3  2  0  0  0  0
  1  4  1  0  0  0  0
  1  5  1  0  0  0  0
  5  6  1  0  0  0  0
  5 10  2  3  0  0  0
  6  7  2  3  0  0  0
  7  8  1  0  0  0  0
  7 11  1  0  0  0  0
  8  9  2  3  0  0  0
  9 10  1  0  0  0  0
 11 12  1  0  0  0  0
 11 16  2  3  0  0  0
 12 13  2  3  0  0  0
 13 14  1  0  0  0  0
 13 17  1  0  0  0  0
 14 15  2  3  0  0  0
 15 16  1  0  0  0  0
 17 18  1  0  0  0  0
 17 22  2  3  0  0  0
 18 19  1  0  0  0  0
 18 26  2  3  0  0  0
 19 20  1  0  0  0  0
 19 23  2  3  0  0  0
 20 21  2  3  0  0  0
 21 22  1  0  0  0  0
 23 24  1  0  0  0  0
 23 27  1  0  0  0  0
 24 25  2  3  0  0  0
 25 26  1  0  0  0  0
 27 28  1  0  0  0  0
 27 29  1  0  0  0  0
 27 30  1  0  0  0  0
M  END
>  <VC-4>
0.064497903

>  <VC-6>
0.020896472

>  <SPC-4>
6.2160578

>  <SwHBa>
23.894968

>  <SHCsats>
0

>  <SHother>
7.3033223

>  <SssCH2>
0

>  <ETA_Shape_Y>
0.28055999

>  <ETA_dBetaP>
0.01667

>  <nAtomP>
25

>  <MDEC-24>
2.2369986

>  <MDEC-33>
9.0935946

>  <MDEC-34>
1.9937414

>  <MLFER_A>
0.003

>  <Classification>
1

$$$$
Clc1c2nc(n(c2ccc1)-c1cc(Oc2cc(S(=O)(=O)C(C)C)ccc2)ccc1)C
  MOE2013           2D

 30 33  0  0  0  0  0  0  0  0999 V2000
    0.0000   -0.0000    0.0000 Cl  0  0  0  0  0  0  0  0  0  0  0  0
    0.7524   -1.2977    0.0000 C   0  0  0  0  0  0  0  0  0  0  0  0
    2.2524   -1.2949    0.0000 C   0  0  0  0  0  0  0  0  0  0  0  0
    3.2540   -0.1783    0.0000 N   0  0  0  0  0  0  0  0  0  0  0  0
    4.6255   -0.7859    0.0000 C   0  0  0  0  0  0  0  0  0  0  0  0
    4.4714   -2.2780    0.0000 N   0  0  0  0  0  0  0  0  0  0  0  0
    3.0048   -2.5925    0.0000 C   0  0  0  0  0  0  0  0  0  0  0  0
    2.2572   -3.8930    0.0000 C   0  0  0  0  0  0  0  0  0  0  0  0
    0.7572   -3.8957    0.0000 C   0  0  0  0  0  0  0  0  0  0  0  0
    0.0048   -2.5981    0.0000 C   0  0  0  0  0  0  0  0  0  0  0  0
    5.5880   -3.2796    0.0000 C   0  0  0  0  0  0  0  0  0  0  0  0
    7.0137   -2.8135    0.0000 C   0  0  0  0  0  0  0  0  0  0  0  0
    8.1303   -3.8151    0.0000 C   0  0  0  0  0  0  0  0  0  0  0  0
    9.5560   -3.3490    0.0000 O   0  0  0  0  0  0  0  0  0  0  0  0
   10.6726   -4.3506    0.0000 C   0  0  0  0  0  0  0  0  0  0  0  0
   12.0983   -3.8845    0.0000 C   0  0  0  0  0  0  0  0  0  0  0  0
   13.2149   -4.8861    0.0000 C   0  0  0  0  0  0  0  0  0  0  0  0
   14.6406   -4.4199    0.0000 S   0  0  0  0  0  0  0  0  0  0  0  0
   15.1067   -5.8457    0.0000 O   0  0  0  0  0  0  0  0  0  0  0  0
   14.1744   -2.9942    0.0000 O   0  0  0  0  0  0  0  0  0  0  0  0
   16.0663   -3.9538    0.0000 C   0  0  0  0  0  0  0  0  0  0  0  0
   16.3755   -2.4860    0.0000 C   0  0  0  0  0  0  0  0  0  0  0  0
   17.1829   -4.9554    0.0000 C   0  0  0  0  0  0  0  0  0  0  0  0
   12.9057   -6.3539    0.0000 C   0  0  0  0  0  0  0  0  0  0  0  0
   11.4800   -6.8200    0.0000 C   0  0  0  0  0  0  0  0  0  0  0  0
   10.3634   -5.8184    0.0000 C   0  0  0  0  0  0  0  0  0  0  0  0
    7.8211   -5.2829    0.0000 C   0  0  0  0  0  0  0  0  0  0  0  0
    6.3954   -5.7491    0.0000 C   0  0  0  0  0  0  0  0  0  0  0  0
    5.2788   -4.7474    0.0000 C   0  0  0  0  0  0  0  0  0  0  0  0
    5.9231   -0.0335    0.0000 C   0  0  0  0  0  0  0  0  0  0  0  0
  1  2  1  0  0  0  0
  2  3  1  0  0  0  0
  2 10  2  3  0  0  0
  3  4  1  0  0  0  0
  3  7  2  3  0  0  0
  4  5  2  3  0  0  0
  5  6  1  0  0  0  0
  5 30  1  0  0  0  0
  6  7  1  0  0  0  0
  6 11  1  0  0  0  0
  7  8  1  0  0  0  0
  8  9  2  3  0  0  0
  9 10  1  0  0  0  0
 11 12  1  0  0  0  0
 11 29  2  3  0  0  0
 12 13  2  3  0  0  0
 13 14  1  0  0  0  0
 13 27  1  0  0  0  0
 14 15  1  0  0  0  0
 15 16  1  0  0  0  0
 15 26  2  3  0  0  0
 16 17  2  3  0  0  0
 17 18  1  0  0  0  0
 17 24  1  0  0  0  0
 18 19  2  0  0  0  0
 18 20  2  0  0  0  0
 18 21  1  0  0  0  0
 21 22  1  0  0  0  0
 21 23  1  0  0  0  0
 24 25  2  3  0  0  0
 25 26  1  0  0  0  0
 27 28  2  3  0  0  0
 28 29  1  0  0  0  0
M  END
>  <VC-4>
0.029444385

>  <VC-6>
0.03925918

>  <SPC-4>
6.8727117

>  <SwHBa>
27.826607

>  <SHCsats>
1.3940841

>  <SHother>
5.7529583

>  <SssCH2>
0

>  <ETA_Shape_Y>
0.33002001

>  <ETA_dBetaP>
-0.058329999

>  <nAtomP>
25

>  <MDEC-24>
0

>  <MDEC-33>
8.5928917

>  <MDEC-34>
0

>  <MLFER_A>
0.003

>  <Classification>
1

$$$$
FC(F)(F)c1noc2c1ccc(OCCCN(CC)c1ccc(cc1)CC(=O)[O-])c2CCC
  MOE2013           2D

 33 35  0  0  1  0  0  0  0  0999 V2000
   -0.0000   -0.0000    0.0000 F   0  0  0  0  0  0  0  0  0  0  0  0
    0.3784    1.4515    0.0000 C   0  0  0  0  0  0  0  0  0  0  0  0
   -1.0731    1.8299    0.0000 F   0  0  0  0  0  0  0  0  0  0  0  0
    1.8299    1.0731    0.0000 F   0  0  0  0  0  0  0  0  0  0  0  0
    0.7568    2.9030    0.0000 C   0  0  0  0  0  0  0  0  0  0  0  0
   -0.1951    4.0623    0.0000 N   0  0  0  0  0  0  0  0  0  0  0  0
    0.6133    5.3258    0.0000 O   0  0  0  0  0  0  0  0  0  0  0  0
    2.0648    4.9474    0.0000 C   0  0  0  0  0  0  0  0  0  0  0  0
    2.1534    3.4500    0.0000 C   0  0  0  0  0  0  0  0  0  0  0  0
    3.4945    2.7781    0.0000 C   0  0  0  0  0  0  0  0  0  0  0  0
    4.7470    3.6036    0.0000 C   0  0  0  0  0  0  0  0  0  0  0  0
    4.6583    5.1010    0.0000 C   0  0  0  0  0  0  0  0  0  0  0  0
    5.9107    5.9265    0.0000 O   0  0  0  0  0  0  0  0  0  0  0  0
    7.2518    5.2546    0.0000 C   0  0  0  0  0  0  0  0  0  0  0  0
    8.5043    6.0801    0.0000 C   0  0  0  0  0  0  0  0  0  0  0  0
    9.8454    5.4082    0.0000 C   0  0  0  0  0  0  0  0  0  0  0  0
   11.0978    6.2337    0.0000 N   0  0  3  0  0  0  0  0  0  0  0  0
   11.0091    7.7311    0.0000 C   0  0  0  0  0  0  0  0  0  0  0  0
   12.2615    8.5565    0.0000 C   0  0  0  0  0  0  0  0  0  0  0  0
   12.4389    5.5618    0.0000 C   0  0  0  0  0  0  0  0  0  0  0  0
   13.6913    6.3873    0.0000 C   0  0  0  0  0  0  0  0  0  0  0  0
   15.0324    5.7154    0.0000 C   0  0  0  0  0  0  0  0  0  0  0  0
   15.1211    4.2180    0.0000 C   0  0  0  0  0  0  0  0  0  0  0  0
   13.8687    3.3925    0.0000 C   0  0  0  0  0  0  0  0  0  0  0  0
   12.5276    4.0644    0.0000 C   0  0  0  0  0  0  0  0  0  0  0  0
   16.4622    3.5461    0.0000 C   0  0  0  0  0  0  0  0  0  0  0  0
   17.7146    4.3716    0.0000 C   0  0  0  0  0  0  0  0  0  0  0  0
   17.6260    5.8690    0.0000 O   0  0  0  0  0  0  0  0  0  0  0  0
   19.0557    3.6997    0.0000 O   0  5  0  0  0  0  0  0  0  0  0  0
    3.3172    5.7729    0.0000 C   0  0  0  0  0  0  0  0  0  0  0  0
    3.2285    7.2703    0.0000 C   0  0  0  0  0  0  0  0  0  0  0  0
    1.8874    7.9422    0.0000 C   0  0  0  0  0  0  0  0  0  0  0  0
    1.7987    9.4395    0.0000 C   0  0  0  0  0  0  0  0  0  0  0  0
  1  2  1  0  0  0  0
  2  3  1  0  0  0  0
  2  4  1  0  0  0  0
  2  5  1  0  0  0  0
  5  6  2  3  0  0  0
  5  9  1  0  0  0  0
  6  7  1  0  0  0  0
  7  8  1  0  0  0  0
  8  9  1  0  0  0  0
  8 30  2  3  0  0  0
  9 10  2  3  0  0  0
 10 11  1  0  0  0  0
 11 12  2  3  0  0  0
 12 13  1  0  0  0  0
 12 30  1  0  0  0  0
 13 14  1  0  0  0  0
 14 15  1  0  0  0  0
 15 16  1  0  0  0  0
 16 17  1  0  0  0  0
 17 18  1  0  0  0  0
 17 20  1  0  0  0  0
 18 19  1  0  0  0  0
 20 21  1  0  0  0  0
 20 25  2  3  0  0  0
 21 22  2  3  0  0  0
 22 23  1  0  0  0  0
 23 24  2  3  0  0  0
 23 26  1  0  0  0  0
 24 25  1  0  0  0  0
 26 27  1  0  0  0  0
 27 28  2  0  0  0  0
 27 29  1  0  0  0  0
 30 31  1  0  0  0  0
 31 32  1  0  0  0  0
 32 33  1  0  0  0  0
M  CHG  1  29  -1
M  END
>  <VC-4>
0.013498731

>  <VC-6>
0.0030184081

>  <SPC-4>
5.1288271

>  <SwHBa>
10.833604

>  <SHCsats>
4.4360504

>  <SHother>
3.2993364

>  <SssCH2>
3.6165128

>  <ETA_Shape_Y>
0.29352

>  <ETA_dBetaP>
-0.26515001

>  <nAtomP>
10

>  <MDEC-24>
1.5901787

>  <MDEC-33>
5.7913489

>  <MDEC-34>
1.6566747

>  <MLFER_A>
0.24600001

>  <Classification>
0

$$$$
Clc1ccccc1S(=O)(=O)[C@@](C(OC)=O)(C)[C@@H]1CCc2c([nH]c3c2cc(Cl)cc3)C1
  MOE2013           2D

 30 33  0  0  1  0  0  0  0  0999 V2000
    0.0000   -0.0000    0.0000 Cl  0  0  0  0  0  0  0  0  0  0  0  0
   -1.3014   -0.7460    0.0000 C   0  0  0  0  0  0  0  0  0  0  0  0
   -2.5981    0.0081    0.0000 C   0  0  0  0  0  0  0  0  0  0  0  0
   -3.8994   -0.7379    0.0000 C   0  0  0  0  0  0  0  0  0  0  0  0
   -3.9041   -2.2379    0.0000 C   0  0  0  0  0  0  0  0  0  0  0  0
   -2.6074   -2.9919    0.0000 C   0  0  0  0  0  0  0  0  0  0  0  0
   -1.3060   -2.2460    0.0000 C   0  0  0  0  0  0  0  0  0  0  0  0
   -0.0093   -3.0000    0.0000 S   0  0  0  0  0  0  0  0  0  0  0  0
    0.7447   -1.7033    0.0000 O   0  0  0  0  0  0  0  0  0  0  0  0
   -0.7633   -4.2967    0.0000 O   0  0  0  0  0  0  0  0  0  0  0  0
    1.2874   -3.7540    0.0000 C   0  0  1  0  0  0  0  0  0  0  0  0
    0.5334   -5.0507    0.0000 C   0  0  0  0  0  0  0  0  0  0  0  0
   -0.9666   -5.0461    0.0000 O   0  0  0  0  0  0  0  0  0  0  0  0
   -1.7206   -6.3428    0.0000 C   0  0  0  0  0  0  0  0  0  0  0  0
    1.2794   -6.3521    0.0000 O   0  0  0  0  0  0  0  0  0  0  0  0
    2.0414   -2.4573    0.0000 C   0  0  0  0  0  0  0  0  0  0  0  0
    2.5841   -4.5080    0.0000 C   0  0  2  0  0  0  0  0  0  0  0  0
    2.5795   -6.0080    0.0000 C   0  0  0  0  0  0  0  0  0  0  0  0
    3.8762   -6.7620    0.0000 C   0  0  0  0  0  0  0  0  0  0  0  0
    5.1775   -6.0161    0.0000 C   0  0  0  0  0  0  0  0  0  0  0  0
    5.1822   -4.5161    0.0000 C   0  0  0  0  0  0  0  0  0  0  0  0
    6.6102   -4.0570    0.0000 N   0  0  0  0  0  0  0  0  0  0  0  0
    7.4881   -5.2732    0.0000 C   0  0  0  0  0  0  0  0  0  0  0  0
    6.6027   -6.4840    0.0000 C   0  0  0  0  0  0  0  0  0  0  0  0
    7.2085   -7.8562    0.0000 C   0  0  0  0  0  0  0  0  0  0  0  0
    8.6998   -8.0176    0.0000 C   0  0  0  0  0  0  0  0  0  0  0  0
    9.3057   -9.3898    0.0000 Cl  0  0  0  0  0  0  0  0  0  0  0  0
    9.5853   -6.8069    0.0000 C   0  0  0  0  0  0  0  0  0  0  0  0
    8.9794   -5.4346    0.0000 C   0  0  0  0  0  0  0  0  0  0  0  0
    3.8855   -3.7621    0.0000 C   0  0  0  0  0  0  0  0  0  0  0  0
  1  2  1  0  0  0  0
  2  3  1  0  0  0  0
  2  7  2  3  0  0  0
  3  4  2  3  0  0  0
  4  5  1  0  0  0  0
  5  6  2  3  0  0  0
  6  7  1  0  0  0  0
  7  8  1  0  0  0  0
  8  9  2  0  0  0  0
  8 10  2  0  0  0  0
 11  8  1  1  0  0  0
 11 12  1  0  0  0  0
 11 16  1  6  0  0  0
 11 17  1  0  0  0  0
 12 13  1  0  0  0  0
 12 15  2  0  0  0  0
 13 14  1  0  0  0  0
 17 18  1  1  0  0  0
 17 30  1  0  0  0  0
 18 19  1  0  0  0  0
 19 20  1  0  0  0  0
 20 21  2  3  0  0  0
 20 24  1  0  0  0  0
 21 22  1  0  0  0  0
 21 30  1  0  0  0  0
 22 23  1  0  0  0  0
 23 24  1  0  0  0  0
 23 29  2  3  0  0  0
 24 25  2  3  0  0  0
 25 26  1  0  0  0  0
 26 27  1  0  0  0  0
 26 28  2  3  0  0  0
 28 29  1  0  0  0  0
M  END
>  <VC-4>
0.11383274

>  <VC-6>
0.151867

>  <SPC-4>
8.3503885

>  <SwHBa>
20.395206

>  <SHCsats>
2.9775298

>  <SHother>
3.1669486

>  <SssCH2>
1.9888252

>  <ETA_Shape_Y>
0.3001

>  <ETA_dBetaP>
-0.15000001

>  <nAtomP>
9

>  <MDEC-24>
2.5937057

>  <MDEC-33>
9.8320837

>  <MDEC-34>
3.1524324

>  <MLFER_A>
0.37400001

>  <Classification>
0

$$$$
FC(F)(F)c1c2ncc(C(=O)c3ccccc3)c(c2ccc1)-c1ccccc1
  MOE2013           2D

 28 31  0  0  0  0  0  0  0  0999 V2000
   -0.0000   -0.0000    0.0000 F   0  0  0  0  0  0  0  0  0  0  0  0
   -0.7425    1.3033    0.0000 C   0  0  0  0  0  0  0  0  0  0  0  0
   -2.0458    0.5608    0.0000 F   0  0  0  0  0  0  0  0  0  0  0  0
    0.5608    2.0458    0.0000 F   0  0  0  0  0  0  0  0  0  0  0  0
   -1.4850    2.6067    0.0000 C   0  0  0  0  0  0  0  0  0  0  0  0
   -2.9850    2.6153    0.0000 C   0  0  0  0  0  0  0  0  0  0  0  0
   -3.7425    1.3206    0.0000 N   0  0  0  0  0  0  0  0  0  0  0  0
   -5.2424    1.3292    0.0000 C   0  0  0  0  0  0  0  0  0  0  0  0
   -5.9850    2.6326    0.0000 C   0  0  0  0  0  0  0  0  0  0  0  0
   -7.4849    2.6412    0.0000 C   0  0  0  0  0  0  0  0  0  0  0  0
   -8.2274    3.9445    0.0000 O   0  0  0  0  0  0  0  0  0  0  0  0
   -8.2424    1.3465    0.0000 C   0  0  0  0  0  0  0  0  0  0  0  0
   -7.4999    0.0432    0.0000 C   0  0  0  0  0  0  0  0  0  0  0  0
   -8.2573   -1.2515    0.0000 C   0  0  0  0  0  0  0  0  0  0  0  0
   -9.7573   -1.2429    0.0000 C   0  0  0  0  0  0  0  0  0  0  0  0
  -10.4998    0.0604    0.0000 C   0  0  0  0  0  0  0  0  0  0  0  0
   -9.7424    1.3551    0.0000 C   0  0  0  0  0  0  0  0  0  0  0  0
   -5.2275    3.9273    0.0000 C   0  0  0  0  0  0  0  0  0  0  0  0
   -3.7275    3.9186    0.0000 C   0  0  0  0  0  0  0  0  0  0  0  0
   -2.9701    5.2133    0.0000 C   0  0  0  0  0  0  0  0  0  0  0  0
   -1.4701    5.2047    0.0000 C   0  0  0  0  0  0  0  0  0  0  0  0
   -0.7276    3.9014    0.0000 C   0  0  0  0  0  0  0  0  0  0  0  0
   -5.9700    5.2306    0.0000 C   0  0  0  0  0  0  0  0  0  0  0  0
   -7.4700    5.2392    0.0000 C   0  0  0  0  0  0  0  0  0  0  0  0
   -8.2125    6.5425    0.0000 C   0  0  0  0  0  0  0  0  0  0  0  0
   -7.4550    7.8373    0.0000 C   0  0  0  0  0  0  0  0  0  0  0  0
   -5.9551    7.8286    0.0000 C   0  0  0  0  0  0  0  0  0  0  0  0
   -5.2125    6.5253    0.0000 C   0  0  0  0  0  0  0  0  0  0  0  0
  1  2  1  0  0  0  0
  2  3  1  0  0  0  0
  2  4  1  0  0  0  0
  2  5  1  0  0  0  0
  5  6  1  0  0  0  0
  5 22  2  3  0  0  0
  6  7  1  0  0  0  0
  6 19  2  3  0  0  0
  7  8  2  3  0  0  0
  8  9  1  0  0  0  0
  9 10  1  0  0  0  0
  9 18  2  3  0  0  0
 10 11  2  0  0  0  0
 10 12  1  0  0  0  0
 12 13  1  0  0  0  0
 12 17  2  3  0  0  0
 13 14  2  3  0  0  0
 14 15  1  0  0  0  0
 15 16  2  3  0  0  0
 16 17  1  0  0  0  0
 18 19  1  0  0  0  0
 18 23  1  0  0  0  0
 19 20  1  0  0  0  0
 20 21  2  3  0  0  0
 21 22  1  0  0  0  0
 23 24  1  0  0  0  0
 23 28  2  3  0  0  0
 24 25  2  3  0  0  0
 25 26  1  0  0  0  0
 26 27  2  3  0  0  0
 27 28  1  0  0  0  0
M  END
>  <VC-4>
0.013498731

>  <VC-6>
0.0038967479

>  <SPC-4>
4.9207559

>  <SwHBa>
23.56905

>  <SHCsats>
0

>  <SHother>
7.9958515

>  <SssCH2>
0

>  <ETA_Shape_Y>
0.30557001

>  <ETA_dBetaP>
0.03571

>  <nAtomP>
24

>  <MDEC-24>
2.3516693

>  <MDEC-33>
12.145965

>  <MDEC-34>
2.2537975

>  <MLFER_A>
0.003

>  <Classification>
0

$$$$
Clc1ccc(Oc2cc(S(=O)(=O)C)ccc2)cc1-n1c2c(nc1)c(ccc2)C(F)(F)F
  MOE2013           2D

 31 34  0  0  0  0  0  0  0  0999 V2000
    0.0000    0.0000    0.0000 Cl  0  0  0  0  0  0  0  0  0  0  0  0
   -0.7395   -1.3051    0.0000 C   0  0  0  0  0  0  0  0  0  0  0  0
   -2.2394   -1.3172    0.0000 C   0  0  0  0  0  0  0  0  0  0  0  0
   -2.9789   -2.6223    0.0000 C   0  0  0  0  0  0  0  0  0  0  0  0
   -2.2184   -3.9152    0.0000 C   0  0  0  0  0  0  0  0  0  0  0  0
   -2.9579   -5.2203    0.0000 O   0  0  0  0  0  0  0  0  0  0  0  0
   -4.4578   -5.2324    0.0000 C   0  0  0  0  0  0  0  0  0  0  0  0
   -5.1973   -6.5375    0.0000 C   0  0  0  0  0  0  0  0  0  0  0  0
   -6.6972   -6.5496    0.0000 C   0  0  0  0  0  0  0  0  0  0  0  0
   -7.4367   -7.8547    0.0000 S   0  0  0  0  0  0  0  0  0  0  0  0
   -6.1316   -8.5941    0.0000 O   0  0  0  0  0  0  0  0  0  0  0  0
   -8.7417   -7.1152    0.0000 O   0  0  0  0  0  0  0  0  0  0  0  0
   -8.1761   -9.1597    0.0000 C   0  0  0  0  0  0  0  0  0  0  0  0
   -7.4577   -5.2567    0.0000 C   0  0  0  0  0  0  0  0  0  0  0  0
   -6.7182   -3.9516    0.0000 C   0  0  0  0  0  0  0  0  0  0  0  0
   -5.2183   -3.9395    0.0000 C   0  0  0  0  0  0  0  0  0  0  0  0
   -0.7184   -3.9031    0.0000 C   0  0  0  0  0  0  0  0  0  0  0  0
    0.0210   -2.5980    0.0000 C   0  0  0  0  0  0  0  0  0  0  0  0
    1.5210   -2.5859    0.0000 N   0  0  0  0  0  0  0  0  0  0  0  0
    2.4124   -3.7922    0.0000 C   0  0  0  0  0  0  0  0  0  0  0  0
    3.8352   -3.3172    0.0000 C   0  0  0  0  0  0  0  0  0  0  0  0
    3.8231   -1.8172    0.0000 N   0  0  0  0  0  0  0  0  0  0  0  0
    2.3928   -1.3652    0.0000 C   0  0  0  0  0  0  0  0  0  0  0  0
    4.9580   -4.3118    0.0000 C   0  0  0  0  0  0  0  0  0  0  0  0
    4.6580   -5.7815    0.0000 C   0  0  0  0  0  0  0  0  0  0  0  0
    3.2353   -6.2565    0.0000 C   0  0  0  0  0  0  0  0  0  0  0  0
    2.1125   -5.2619    0.0000 C   0  0  0  0  0  0  0  0  0  0  0  0
    6.3808   -3.8367    0.0000 C   0  0  0  0  0  0  0  0  0  0  0  0
    5.9058   -2.4140    0.0000 F   0  0  0  0  0  0  0  0  0  0  0  0
    7.8036   -3.3617    0.0000 F   0  0  0  0  0  0  0  0  0  0  0  0
    6.8559   -5.2595    0.0000 F   0  0  0  0  0  0  0  0  0  0  0  0
  1  2  1  0  0  0  0
  2  3  1  0  0  0  0
  2 18  2  3  0  0  0
  3  4  2  3  0  0  0
  4  5  1  0  0  0  0
  5  6  1  0  0  0  0
  5 17  2  3  0  0  0
  6  7  1  0  0  0  0
  7  8  1  0  0  0  0
  7 16  2  3  0  0  0
  8  9  2  3  0  0  0
  9 10  1  0  0  0  0
  9 14  1  0  0  0  0
 10 11  2  0  0  0  0
 10 12  2  0  0  0  0
 10 13  1  0  0  0  0
 14 15  2  3  0  0  0
 15 16  1  0  0  0  0
 17 18  1  0  0  0  0
 18 19  1  0  0  0  0
 19 20  1  0  0  0  0
 19 23  1  0  0  0  0
 20 21  1  0  0  0  0
 20 27  2  3  0  0  0
 21 22  1  0  0  0  0
 21 24  2  3  0  0  0
 22 23  2  3  0  0  0
 24 25  1  0  0  0  0
 24 28  1  0  0  0  0
 25 26  2  3  0  0  0
 26 27  1  0  0  0  0
 28 29  1  0  0  0  0
 28 30  1  0  0  0  0
 28 31  1  0  0  0  0
M  END
>  <VC-4>
0.064497903

>  <VC-6>
0.020896472

>  <SPC-4>
6.5858541

>  <SwHBa>
19.176233

>  <SHCsats>
0

>  <SHother>
6.7651172

>  <SssCH2>
0

>  <ETA_Shape_Y>
0.29922

>  <ETA_dBetaP>
-0.096770003

>  <nAtomP>
25

>  <MDEC-24>
1.806847

>  <MDEC-33>
7.6180511

>  <MDEC-34>
1.8453947

>  <MLFER_A>
0.003

>  <Classification>
1

$$$$
Clc1c2nc(n(c2ccc1)-c1cc(Oc2cc(S(=O)(=O)C)ccc2)ccc1)C
  MOE2013           2D

 28 31  0  0  0  0  0  0  0  0999 V2000
    0.0000    0.0000    0.0000 Cl  0  0  0  0  0  0  0  0  0  0  0  0
    1.2929   -0.7605    0.0000 C   0  0  0  0  0  0  0  0  0  0  0  0
    2.5980   -0.0211    0.0000 C   0  0  0  0  0  0  0  0  0  0  0  0
    2.9218    1.4435    0.0000 N   0  0  0  0  0  0  0  0  0  0  0  0
    4.4148    1.5882    0.0000 C   0  0  0  0  0  0  0  0  0  0  0  0
    5.0137    0.2129    0.0000 N   0  0  0  0  0  0  0  0  0  0  0  0
    3.8909   -0.7817    0.0000 C   0  0  0  0  0  0  0  0  0  0  0  0
    3.8787   -2.2816    0.0000 C   0  0  0  0  0  0  0  0  0  0  0  0
    2.5736   -3.0210    0.0000 C   0  0  0  0  0  0  0  0  0  0  0  0
    1.2807   -2.2605    0.0000 C   0  0  0  0  0  0  0  0  0  0  0  0
    6.4784   -0.1109    0.0000 C   0  0  0  0  0  0  0  0  0  0  0  0
    7.4911    0.9956    0.0000 C   0  0  0  0  0  0  0  0  0  0  0  0
    8.9557    0.6719    0.0000 C   0  0  0  0  0  0  0  0  0  0  0  0
    9.9685    1.7784    0.0000 O   0  0  0  0  0  0  0  0  0  0  0  0
   11.4331    1.4546    0.0000 C   0  0  0  0  0  0  0  0  0  0  0  0
   12.4458    2.5611    0.0000 C   0  0  0  0  0  0  0  0  0  0  0  0
   13.9105    2.2373    0.0000 C   0  0  0  0  0  0  0  0  0  0  0  0
   14.9232    3.3438    0.0000 S   0  0  0  0  0  0  0  0  0  0  0  0
   16.0297    2.3311    0.0000 O   0  0  0  0  0  0  0  0  0  0  0  0
   13.8167    4.3565    0.0000 O   0  0  0  0  0  0  0  0  0  0  0  0
   15.9359    4.4503    0.0000 C   0  0  0  0  0  0  0  0  0  0  0  0
   14.3624    0.8070    0.0000 C   0  0  0  0  0  0  0  0  0  0  0  0
   13.3496   -0.2995    0.0000 C   0  0  0  0  0  0  0  0  0  0  0  0
   11.8850    0.0243    0.0000 C   0  0  0  0  0  0  0  0  0  0  0  0
    9.4076   -0.7585    0.0000 C   0  0  0  0  0  0  0  0  0  0  0  0
    8.3949   -1.8650    0.0000 C   0  0  0  0  0  0  0  0  0  0  0  0
    6.9303   -1.5412    0.0000 C   0  0  0  0  0  0  0  0  0  0  0  0
    5.1753    2.8811    0.0000 C   0  0  0  0  0  0  0  0  0  0  0  0
  1  2  1  0  0  0  0
  2  3  1  0  0  0  0
  2 10  2  3  0  0  0
  3  4  1  0  0  0  0
  3  7  2  3  0  0  0
  4  5  2  3  0  0  0
  5  6  1  0  0  0  0
  5 28  1  0  0  0  0
  6  7  1  0  0  0  0
  6 11  1  0  0  0  0
  7  8  1  0  0  0  0
  8  9  2  3  0  0  0
  9 10  1  0  0  0  0
 11 12  1  0  0  0  0
 11 27  2  3  0  0  0
 12 13  2  3  0  0  0
 13 14  1  0  0  0  0
 13 25  1  0  0  0  0
 14 15  1  0  0  0  0
 15 16  1  0  0  0  0
 15 24  2  3  0  0  0
 16 17  2  3  0  0  0
 17 18  1  0  0  0  0
 17 22  1  0  0  0  0
 18 19  2  0  0  0  0
 18 20  2  0  0  0  0
 18 21  1  0  0  0  0
 22 23  2  3  0  0  0
 23 24  1  0  0  0  0
 25 26  2  3  0  0  0
 26 27  1  0  0  0  0
M  END
>  <VC-4>
0.050999172

>  <VC-6>
0.016999723

>  <SPC-4>
5.2907743

>  <SwHBa>
27.602087

>  <SHCsats>
0

>  <SHother>
5.846261

>  <SssCH2>
0

>  <ETA_Shape_Y>
0.31773999

>  <ETA_dBetaP>
-0.02679

>  <nAtomP>
25

>  <MDEC-24>
0

>  <MDEC-33>
7.7036209

>  <MDEC-34>
0

>  <MLFER_A>
0.003

>  <Classification>
1

$$$$
Oc1cc2c(CC[C@H]3[C@](CCC[C@]23C)(C(=O)NCC(C)(c2ccccc2)c2ccccc2)C)cc1
  MOE2013           2D

 35 39  0  0  1  0  0  0  0  0999 V2000
   -0.0000   -0.0000    0.0000 O   0  0  0  0  0  0  0  0  0  0  0  0
   -1.2982    0.7515    0.0000 C   0  0  0  0  0  0  0  0  0  0  0  0
   -2.5981    0.0029    0.0000 C   0  0  0  0  0  0  0  0  0  0  0  0
   -3.8963    0.7544    0.0000 C   0  0  0  0  0  0  0  0  0  0  0  0
   -3.8946    2.2544    0.0000 C   0  0  0  0  0  0  0  0  0  0  0  0
   -5.1928    3.0058    0.0000 C   0  0  0  0  0  0  0  0  0  0  0  0
   -6.4927    2.2573    0.0000 C   0  0  0  0  0  0  0  0  0  0  0  0
   -6.4943    0.7573    0.0000 C   0  0  1  0  0  0  0  0  0  0  0  0
   -7.7942    0.0087    0.0000 C   0  0  2  0  0  0  0  0  0  0  0  0
   -7.7959   -1.4913    0.0000 C   0  0  0  0  0  0  0  0  0  0  0  0
   -6.4977   -2.2427    0.0000 C   0  0  0  0  0  0  0  0  0  0  0  0
   -5.1978   -1.4942    0.0000 C   0  0  0  0  0  0  0  0  0  0  0  0
   -5.1961    0.0058    0.0000 C   0  0  2  0  0  0  0  0  0  0  0  0
   -3.8980   -0.7456    0.0000 C   0  0  0  0  0  0  0  0  0  0  0  0
   -9.2942    0.0104    0.0000 C   0  0  0  0  0  0  0  0  0  0  0  0
  -10.0428    1.3103    0.0000 O   0  0  0  0  0  0  0  0  0  0  0  0
  -10.0457   -1.2878    0.0000 N   0  0  0  0  0  0  0  0  0  0  0  0
  -11.5457   -1.2861    0.0000 C   0  0  0  0  0  0  0  0  0  0  0  0
  -12.2971   -2.5843    0.0000 C   0  0  0  0  0  0  0  0  0  0  0  0
  -10.9989   -3.3357    0.0000 C   0  0  0  0  0  0  0  0  0  0  0  0
  -13.5953   -1.8328    0.0000 C   0  0  0  0  0  0  0  0  0  0  0  0
  -14.8952   -2.5814    0.0000 C   0  0  0  0  0  0  0  0  0  0  0  0
  -16.1934   -1.8299    0.0000 C   0  0  0  0  0  0  0  0  0  0  0  0
  -16.1917   -0.3299    0.0000 C   0  0  0  0  0  0  0  0  0  0  0  0
  -14.8918    0.4186    0.0000 C   0  0  0  0  0  0  0  0  0  0  0  0
  -13.5936   -0.3328    0.0000 C   0  0  0  0  0  0  0  0  0  0  0  0
  -13.0486   -3.8825    0.0000 C   0  0  0  0  0  0  0  0  0  0  0  0
  -14.5486   -3.8808    0.0000 C   0  0  0  0  0  0  0  0  0  0  0  0
  -15.3000   -5.1790    0.0000 C   0  0  0  0  0  0  0  0  0  0  0  0
  -14.5515   -6.4789    0.0000 C   0  0  0  0  0  0  0  0  0  0  0  0
  -13.0515   -6.4806    0.0000 C   0  0  0  0  0  0  0  0  0  0  0  0
  -12.3000   -5.1824    0.0000 C   0  0  0  0  0  0  0  0  0  0  0  0
   -8.5428    1.3086    0.0000 C   0  0  0  0  0  0  0  0  0  0  0  0
   -2.5947    3.0029    0.0000 C   0  0  0  0  0  0  0  0  0  0  0  0
   -1.2965    2.2515    0.0000 C   0  0  0  0  0  0  0  0  0  0  0  0
  1  2  1  0  0  0  0
  2  3  1  0  0  0  0
  2 35  2  3  0  0  0
  3  4  2  3  0  0  0
  4  5  1  0  0  0  0
  4 13  1  0  0  0  0
  5  6  1  0  0  0  0
  5 34  2  3  0  0  0
  6  7  1  0  0  0  0
  8  7  1  6  0  0  0
  8  9  1  0  0  0  0
  8 13  1  0  0  0  0
  9 10  1  0  0  0  0
  9 15  1  6  0  0  0
  9 33  1  1  0  0  0
 10 11  1  0  0  0  0
 11 12  1  0  0  0  0
 12 13  1  0  0  0  0
 13 14  1  6  0  0  0
 15 16  2  0  0  0  0
 15 17  1  0  0  0  0
 17 18  1  0  0  0  0
 18 19  1  0  0  0  0
 19 20  1  0  0  0  0
 19 21  1  0  0  0  0
 19 27  1  0  0  0  0
 21 22  1  0  0  0  0
 21 26  2  3  0  0  0
 22 23  2  3  0  0  0
 23 24  1  0  0  0  0
 24 25  2  3  0  0  0
 25 26  1  0  0  0  0
 27 28  1  0  0  0  0
 27 32  2  3  0  0  0
 28 29  2  3  0  0  0
 29 30  1  0  0  0  0
 30 31  2  3  0  0  0
 31 32  1  0  0  0  0
 34 35  1  0  0  0  0
M  END
>  <VC-4>
0.29251251

>  <VC-6>
0.18139046

>  <SPC-4>
8.6680613

>  <SwHBa>
32.257

>  <SHCsats>
4.5606122

>  <SHother>
5.3531847

>  <SssCH2>
5.4976158

>  <ETA_Shape_Y>
0.20508

>  <ETA_dBetaP>
-0.15714

>  <nAtomP>
7

>  <MDEC-24>
12.996836

>  <MDEC-33>
4.8773775

>  <MDEC-34>
7.0149555

>  <MLFER_A>
0.91399997

>  <Classification>
0

$$$$
Clc1c2nccc(c2ccc1)-c1cc(Oc2cc(S(=O)(=O)C)ccc2)ccc1
  MOE2013           2D

 28 31  0  0  0  0  0  0  0  0999 V2000
   -0.0000   -0.0000    0.0000 Cl  0  0  0  0  0  0  0  0  0  0  0  0
   -1.2925   -0.7613    0.0000 C   0  0  0  0  0  0  0  0  0  0  0  0
   -2.5980   -0.0226    0.0000 C   0  0  0  0  0  0  0  0  0  0  0  0
   -2.6111    1.4773    0.0000 N   0  0  0  0  0  0  0  0  0  0  0  0
   -3.9166    2.2159    0.0000 C   0  0  0  0  0  0  0  0  0  0  0  0
   -5.2090    1.4547    0.0000 C   0  0  0  0  0  0  0  0  0  0  0  0
   -5.1960   -0.0453    0.0000 C   0  0  0  0  0  0  0  0  0  0  0  0
   -3.8904   -0.7839    0.0000 C   0  0  0  0  0  0  0  0  0  0  0  0
   -3.8774   -2.2839    0.0000 C   0  0  0  0  0  0  0  0  0  0  0  0
   -2.5718   -3.0225    0.0000 C   0  0  0  0  0  0  0  0  0  0  0  0
   -1.2794   -2.2612    0.0000 C   0  0  0  0  0  0  0  0  0  0  0  0
   -6.4884   -0.8066    0.0000 C   0  0  0  0  0  0  0  0  0  0  0  0
   -7.7939   -0.0679    0.0000 C   0  0  0  0  0  0  0  0  0  0  0  0
   -9.0864   -0.8292    0.0000 C   0  0  0  0  0  0  0  0  0  0  0  0
  -10.3919   -0.0906    0.0000 O   0  0  0  0  0  0  0  0  0  0  0  0
  -11.6844   -0.8519    0.0000 C   0  0  0  0  0  0  0  0  0  0  0  0
  -12.9899   -0.1132    0.0000 C   0  0  0  0  0  0  0  0  0  0  0  0
  -14.2823   -0.8745    0.0000 C   0  0  0  0  0  0  0  0  0  0  0  0
  -15.5879   -0.1359    0.0000 S   0  0  0  0  0  0  0  0  0  0  0  0
  -16.3265   -1.4414    0.0000 O   0  0  0  0  0  0  0  0  0  0  0  0
  -14.8492    1.1697    0.0000 O   0  0  0  0  0  0  0  0  0  0  0  0
  -16.8934    0.6028    0.0000 C   0  0  0  0  0  0  0  0  0  0  0  0
  -14.2693   -2.3745    0.0000 C   0  0  0  0  0  0  0  0  0  0  0  0
  -12.9637   -3.1131    0.0000 C   0  0  0  0  0  0  0  0  0  0  0  0
  -11.6713   -2.3518    0.0000 C   0  0  0  0  0  0  0  0  0  0  0  0
   -9.0733   -2.3292    0.0000 C   0  0  0  0  0  0  0  0  0  0  0  0
   -7.7678   -3.0678    0.0000 C   0  0  0  0  0  0  0  0  0  0  0  0
   -6.4753   -2.3065    0.0000 C   0  0  0  0  0  0  0  0  0  0  0  0
  1  2  1  0  0  0  0
  2  3  1  0  0  0  0
  2 11  2  3  0  0  0
  3  4  1  0  0  0  0
  3  8  2  3  0  0  0
  4  5  2  3  0  0  0
  5  6  1  0  0  0  0
  6  7  2  3  0  0  0
  7  8  1  0  0  0  0
  7 12  1  0  0  0  0
  8  9  1  0  0  0  0
  9 10  2  3  0  0  0
 10 11  1  0  0  0  0
 12 13  1  0  0  0  0
 12 28  2  3  0  0  0
 13 14  2  3  0  0  0
 14 15  1  0  0  0  0
 14 26  1  0  0  0  0
 15 16  1  0  0  0  0
 16 17  1  0  0  0  0
 16 25  2  3  0  0  0
 17 18  2  3  0  0  0
 18 19  1  0  0  0  0
 18 23  1  0  0  0  0
 19 20  2  0  0  0  0
 19 21  2  0  0  0  0
 19 22  1  0  0  0  0
 23 24  2  3  0  0  0
 24 25  1  0  0  0  0
 26 27  2  3  0  0  0
 27 28  1  0  0  0  0
M  END
>  <VC-4>
0.050999172

>  <VC-6>
0.016999723

>  <SPC-4>
4.913404

>  <SwHBa>
31.914211

>  <SHCsats>
0

>  <SHother>
6.852345

>  <SssCH2>
0

>  <ETA_Shape_Y>
0.28679001

>  <ETA_dBetaP>
0.053569999

>  <nAtomP>
26

>  <MDEC-24>
0

>  <MDEC-33>
8.2710028

>  <MDEC-34>
0

>  <MLFER_A>
0.003

>  <Classification>
1

$$$$
S(=O)(=O)(C)c1cc(Oc2cc(ccc2)-c2n3c(nc2C(C)C)C(=CC=C3)C#N)ccc1
  MOE2013           2D

 31 34  0  0  0  0  0  0  0  0999 V2000
    0.0000   -0.0000    0.0000 S   0  0  0  0  0  0  0  0  0  0  0  0
    0.7529   -1.2973    0.0000 O   0  0  0  0  0  0  0  0  0  0  0  0
   -0.7529    1.2973    0.0000 O   0  0  0  0  0  0  0  0  0  0  0  0
   -1.2973   -0.7529    0.0000 C   0  0  0  0  0  0  0  0  0  0  0  0
    1.2973    0.7529    0.0000 C   0  0  0  0  0  0  0  0  0  0  0  0
    2.5981    0.0059    0.0000 C   0  0  0  0  0  0  0  0  0  0  0  0
    3.8954    0.7588    0.0000 C   0  0  0  0  0  0  0  0  0  0  0  0
    5.1961    0.0117    0.0000 O   0  0  0  0  0  0  0  0  0  0  0  0
    6.4935    0.7647    0.0000 C   0  0  0  0  0  0  0  0  0  0  0  0
    7.7942    0.0176    0.0000 C   0  0  0  0  0  0  0  0  0  0  0  0
    9.0916    0.7705    0.0000 C   0  0  0  0  0  0  0  0  0  0  0  0
    9.0882    2.2705    0.0000 C   0  0  0  0  0  0  0  0  0  0  0  0
    7.7874    3.0176    0.0000 C   0  0  0  0  0  0  0  0  0  0  0  0
    6.4901    2.2647    0.0000 C   0  0  0  0  0  0  0  0  0  0  0  0
   10.3923    0.0235    0.0000 C   0  0  0  0  0  0  0  0  0  0  0  0
   10.5524   -1.4680    0.0000 N   0  0  0  0  0  0  0  0  0  0  0  0
   12.0204   -1.7765    0.0000 C   0  0  0  0  0  0  0  0  0  0  0  0
   12.7674   -0.4758    0.0000 N   0  0  0  0  0  0  0  0  0  0  0  0
   11.7612    0.6367    0.0000 C   0  0  0  0  0  0  0  0  0  0  0  0
   12.0698    2.1046    0.0000 C   0  0  0  0  0  0  0  0  0  0  0  0
   13.4953    2.5713    0.0000 C   0  0  0  0  0  0  0  0  0  0  0  0
   10.9528    3.1058    0.0000 C   0  0  0  0  0  0  0  0  0  0  0  0
   12.4871   -3.2021    0.0000 C   0  0  0  0  0  0  0  0  0  0  0  0
   11.4859   -4.3190    0.0000 C   0  0  0  0  0  0  0  0  0  0  0  0
   10.0180   -4.0105    0.0000 C   0  0  0  0  0  0  0  0  0  0  0  0
    9.5513   -2.5849    0.0000 C   0  0  0  0  0  0  0  0  0  0  0  0
   13.9550   -3.5106    0.0000 C   0  0  0  0  0  0  0  0  0  0  0  0
   15.4229   -3.8192    0.0000 N   0  0  0  0  0  0  0  0  0  0  0  0
    3.8920    2.2588    0.0000 C   0  0  0  0  0  0  0  0  0  0  0  0
    2.5913    3.0059    0.0000 C   0  0  0  0  0  0  0  0  0  0  0  0
    1.2940    2.2529    0.0000 C   0  0  0  0  0  0  0  0  0  0  0  0
  1  2  2  0  0  0  0
  1  3  2  0  0  0  0
  1  4  1  0  0  0  0
  1  5  1  0  0  0  0
  5  6  1  0  0  0  0
  5 31  2  3  0  0  0
  6  7  2  3  0  0  0
  7  8  1  0  0  0  0
  7 29  1  0  0  0  0
  8  9  1  0  0  0  0
  9 10  1  0  0  0  0
  9 14  2  3  0  0  0
 10 11  2  3  0  0  0
 11 12  1  0  0  0  0
 11 15  1  0  0  0  0
 12 13  2  3  0  0  0
 13 14  1  0  0  0  0
 15 16  1  0  0  0  0
 15 19  2  3  0  0  0
 16 17  1  0  0  0  0
 16 26  1  0  0  0  0
 17 18  2  3  0  0  0
 17 23  1  0  0  0  0
 18 19  1  0  0  0  0
 19 20  1  0  0  0  0
 20 21  1  0  0  0  0
 20 22  1  0  0  0  0
 23 24  2  3  0  0  0
 23 27  1  0  0  0  0
 24 25  1  0  0  0  0
 25 26  2  3  0  0  0
 27 28  3  0  0  0  0
 29 30  2  3  0  0  0
 30 31  1  0  0  0  0
M  END
>  <VC-4>
0.050999172

>  <VC-6>
0.016999723

>  <SPC-4>
5.7609053

>  <SwHBa>
27.169094

>  <SHCsats>
1.4951409

>  <SHother>
6.0844603

>  <SssCH2>
0

>  <ETA_Shape_Y>
0.32594001

>  <ETA_dBetaP>
0.024189999

>  <nAtomP>
27

>  <MDEC-24>
0

>  <MDEC-33>
10.236419

>  <MDEC-34>
0

>  <MLFER_A>
0.003

>  <Classification>
1

$$$$
S(=O)(=O)(C(C)C)c1cc(Oc2cc(-n3c4c(nc3C)c(ccc4)C(F)(F)F)ccc2)ccc1
  MOE2013           2D

 33 36  0  0  0  0  0  0  0  0999 V2000
    0.0000    0.0000    0.0000 S   0  0  0  0  0  0  0  0  0  0  0  0
   -0.7483   -1.3000    0.0000 O   0  0  0  0  0  0  0  0  0  0  0  0
    0.7483    1.3000    0.0000 O   0  0  0  0  0  0  0  0  0  0  0  0
    1.3000   -0.7483    0.0000 C   0  0  0  0  0  0  0  0  0  0  0  0
    1.3020   -2.2483    0.0000 C   0  0  0  0  0  0  0  0  0  0  0  0
    2.5981    0.0034    0.0000 C   0  0  0  0  0  0  0  0  0  0  0  0
   -1.3000    0.7483    0.0000 C   0  0  0  0  0  0  0  0  0  0  0  0
   -2.5981   -0.0034    0.0000 C   0  0  0  0  0  0  0  0  0  0  0  0
   -3.8981    0.7450    0.0000 C   0  0  0  0  0  0  0  0  0  0  0  0
   -5.1961   -0.0067    0.0000 O   0  0  0  0  0  0  0  0  0  0  0  0
   -6.4962    0.7416    0.0000 C   0  0  0  0  0  0  0  0  0  0  0  0
   -7.7942   -0.0101    0.0000 C   0  0  0  0  0  0  0  0  0  0  0  0
   -9.0942    0.7382    0.0000 C   0  0  0  0  0  0  0  0  0  0  0  0
  -10.3923   -0.0135    0.0000 N   0  0  0  0  0  0  0  0  0  0  0  0
  -11.7634    0.5949    0.0000 C   0  0  0  0  0  0  0  0  0  0  0  0
  -12.7657   -0.5211    0.0000 C   0  0  0  0  0  0  0  0  0  0  0  0
  -12.0140   -1.8192    0.0000 N   0  0  0  0  0  0  0  0  0  0  0  0
  -10.5472   -1.5054    0.0000 C   0  0  0  0  0  0  0  0  0  0  0  0
   -9.4311   -2.5077    0.0000 C   0  0  0  0  0  0  0  0  0  0  0  0
  -14.2333   -0.2112    0.0000 C   0  0  0  0  0  0  0  0  0  0  0  0
  -14.6987    1.2148    0.0000 C   0  0  0  0  0  0  0  0  0  0  0  0
  -13.6964    2.3308    0.0000 C   0  0  0  0  0  0  0  0  0  0  0  0
  -12.2288    2.0209    0.0000 C   0  0  0  0  0  0  0  0  0  0  0  0
  -15.2355   -1.3272    0.0000 C   0  0  0  0  0  0  0  0  0  0  0  0
  -16.3515   -0.3249    0.0000 F   0  0  0  0  0  0  0  0  0  0  0  0
  -16.2378   -2.4432    0.0000 F   0  0  0  0  0  0  0  0  0  0  0  0
  -14.1195   -2.3294    0.0000 F   0  0  0  0  0  0  0  0  0  0  0  0
   -9.0962    2.2382    0.0000 C   0  0  0  0  0  0  0  0  0  0  0  0
   -7.7981    2.9899    0.0000 C   0  0  0  0  0  0  0  0  0  0  0  0
   -6.4981    2.2416    0.0000 C   0  0  0  0  0  0  0  0  0  0  0  0
   -3.9000    2.2450    0.0000 C   0  0  0  0  0  0  0  0  0  0  0  0
   -2.6020    2.9966    0.0000 C   0  0  0  0  0  0  0  0  0  0  0  0
   -1.3020    2.2483    0.0000 C   0  0  0  0  0  0  0  0  0  0  0  0
  1  2  2  0  0  0  0
  1  3  2  0  0  0  0
  1  4  1  0  0  0  0
  1  7  1  0  0  0  0
  4  5  1  0  0  0  0
  4  6  1  0  0  0  0
  7  8  1  0  0  0  0
  7 33  2  3  0  0  0
  8  9  2  3  0  0  0
  9 10  1  0  0  0  0
  9 31  1  0  0  0  0
 10 11  1  0  0  0  0
 11 12  1  0  0  0  0
 11 30  2  3  0  0  0
 12 13  2  3  0  0  0
 13 14  1  0  0  0  0
 13 28  1  0  0  0  0
 14 15  1  0  0  0  0
 14 18  1  0  0  0  0
 15 16  1  0  0  0  0
 15 23  2  3  0  0  0
 16 17  1  0  0  0  0
 16 20  2  3  0  0  0
 17 18  2  3  0  0  0
 18 19  1  0  0  0  0
 20 21  1  0  0  0  0
 20 24  1  0  0  0  0
 21 22  2  3  0  0  0
 22 23  1  0  0  0  0
 24 25  1  0  0  0  0
 24 26  1  0  0  0  0
 24 27  1  0  0  0  0
 28 29  2  3  0  0  0
 29 30  1  0  0  0  0
 31 32  2  3  0  0  0
 32 33  1  0  0  0  0
M  END
>  <VC-4>
0.042943116

>  <VC-6>
0.043155927

>  <SPC-4>
8.0358877

>  <SwHBa>
18.67034

>  <SHCsats>
1.4495858

>  <SHother>
6.5435877

>  <SssCH2>
0

>  <ETA_Shape_Y>
0.31632

>  <ETA_dBetaP>
-0.11364

>  <nAtomP>
25

>  <MDEC-24>
1.7414583

>  <MDEC-33>
8.5928917

>  <MDEC-34>
1.9222677

>  <MLFER_A>
0.003

>  <Classification>
1

$$$$
Oc1cc2c(CC[C@H]3[C@](CCC[C@]23C)(C(OCCCC=C)=O)C)cc1
  MOE2013           2D

 25 27  0  0  1  0  0  0  0  0999 V2000
    0.0000    0.0000    0.0000 O   0  0  0  0  0  0  0  0  0  0  0  0
    1.2972   -0.7532    0.0000 C   0  0  0  0  0  0  0  0  0  0  0  0
    2.5981   -0.0064    0.0000 C   0  0  0  0  0  0  0  0  0  0  0  0
    3.8953   -0.7595    0.0000 C   0  0  0  0  0  0  0  0  0  0  0  0
    3.8916   -2.2595    0.0000 C   0  0  0  0  0  0  0  0  0  0  0  0
    5.1888   -3.0127    0.0000 C   0  0  0  0  0  0  0  0  0  0  0  0
    6.4897   -2.2659    0.0000 C   0  0  0  0  0  0  0  0  0  0  0  0
    6.4933   -0.7659    0.0000 C   0  0  1  0  0  0  0  0  0  0  0  0
    7.7942   -0.0191    0.0000 C   0  0  2  0  0  0  0  0  0  0  0  0
    7.7979    1.4809    0.0000 C   0  0  0  0  0  0  0  0  0  0  0  0
    6.5007    2.2341    0.0000 C   0  0  0  0  0  0  0  0  0  0  0  0
    5.1998    1.4873    0.0000 C   0  0  0  0  0  0  0  0  0  0  0  0
    5.1961   -0.0127    0.0000 C   0  0  2  0  0  0  0  0  0  0  0  0
    3.8989    0.7405    0.0000 C   0  0  0  0  0  0  0  0  0  0  0  0
    9.2942   -0.0228    0.0000 C   0  0  0  0  0  0  0  0  0  0  0  0
   10.0474    1.2744    0.0000 O   0  0  0  0  0  0  0  0  0  0  0  0
   11.5474    1.2708    0.0000 C   0  0  0  0  0  0  0  0  0  0  0  0
   12.3006    2.5680    0.0000 C   0  0  0  0  0  0  0  0  0  0  0  0
   13.8005    2.5643    0.0000 C   0  0  0  0  0  0  0  0  0  0  0  0
   14.5537    3.8615    0.0000 C   0  0  0  0  0  0  0  0  0  0  0  0
   16.0537    3.8578    0.0000 C   0  0  0  0  0  0  0  0  0  0  0  0
   10.0410   -1.3236    0.0000 O   0  0  0  0  0  0  0  0  0  0  0  0
    8.5410   -1.3200    0.0000 C   0  0  0  0  0  0  0  0  0  0  0  0
    2.5907   -3.0064    0.0000 C   0  0  0  0  0  0  0  0  0  0  0  0
    1.2935   -2.2532    0.0000 C   0  0  0  0  0  0  0  0  0  0  0  0
  1  2  1  0  0  0  0
  2  3  1  0  0  0  0
  2 25  2  3  0  0  0
  3  4  2  3  0  0  0
  4  5  1  0  0  0  0
  4 13  1  0  0  0  0
  5  6  1  0  0  0  0
  5 24  2  3  0  0  0
  6  7  1  0  0  0  0
  8  7  1  6  0  0  0
  8  9  1  0  0  0  0
  8 13  1  0  0  0  0
  9 10  1  0  0  0  0
  9 15  1  6  0  0  0
  9 23  1  1  0  0  0
 10 11  1  0  0  0  0
 11 12  1  0  0  0  0
 12 13  1  0  0  0  0
 13 14  1  6  0  0  0
 15 16  1  0  0  0  0
 15 22  2  0  0  0  0
 16 17  1  0  0  0  0
 17 18  1  0  0  0  0
 18 19  1  0  0  0  0
 19 20  1  0  0  0  0
 20 21  2  0  0  0  0
 24 25  1  0  0  0  0
M  END
>  <VC-4>
0.20412414

>  <VC-6>
0.11864191

>  <SPC-4>
5.8462501

>  <SwHBa>
14.137442

>  <SHCsats>
4.8738565

>  <SHother>
2.0783763

>  <SssCH2>
7.1252441

>  <ETA_Shape_Y>
0.20833001

>  <ETA_dBetaP>
-0.30000001

>  <nAtomP>
7

>  <MDEC-24>
7.3363075

>  <MDEC-33>
3.5167592

>  <MDEC-34>
4.9734483

>  <MLFER_A>
0.546

>  <Classification>
0

$$$$
Clc1c2ncc(C)c(c2ccc1)-c1cc(Oc2cc(ccc2)C(=O)N2CCCC2)ccc1
  MOE2013           2D

 32 36  0  0  0  0  0  0  0  0999 V2000
    0.0000    0.0000    0.0000 Cl  0  0  0  0  0  0  0  0  0  0  0  0
    1.2955    0.7560    0.0000 C   0  0  0  0  0  0  0  0  0  0  0  0
    2.5980    0.0121    0.0000 C   0  0  0  0  0  0  0  0  0  0  0  0
    2.6050   -1.4879    0.0000 N   0  0  0  0  0  0  0  0  0  0  0  0
    3.9075   -2.2319    0.0000 C   0  0  0  0  0  0  0  0  0  0  0  0
    5.2031   -1.4759    0.0000 C   0  0  0  0  0  0  0  0  0  0  0  0
    6.5056   -2.2198    0.0000 C   0  0  0  0  0  0  0  0  0  0  0  0
    5.1961    0.0241    0.0000 C   0  0  0  0  0  0  0  0  0  0  0  0
    3.8936    0.7681    0.0000 C   0  0  0  0  0  0  0  0  0  0  0  0
    3.8866    2.2681    0.0000 C   0  0  0  0  0  0  0  0  0  0  0  0
    2.5841    3.0120    0.0000 C   0  0  0  0  0  0  0  0  0  0  0  0
    1.2886    2.2560    0.0000 C   0  0  0  0  0  0  0  0  0  0  0  0
    6.4916    0.7802    0.0000 C   0  0  0  0  0  0  0  0  0  0  0  0
    7.7941    0.0362    0.0000 C   0  0  0  0  0  0  0  0  0  0  0  0
    9.0897    0.7922    0.0000 C   0  0  0  0  0  0  0  0  0  0  0  0
   10.3922    0.0483    0.0000 O   0  0  0  0  0  0  0  0  0  0  0  0
   11.6877    0.8043    0.0000 C   0  0  0  0  0  0  0  0  0  0  0  0
   12.9902    0.0603    0.0000 C   0  0  0  0  0  0  0  0  0  0  0  0
   14.2858    0.8163    0.0000 C   0  0  0  0  0  0  0  0  0  0  0  0
   14.2788    2.3163    0.0000 C   0  0  0  0  0  0  0  0  0  0  0  0
   12.9763    3.0603    0.0000 C   0  0  0  0  0  0  0  0  0  0  0  0
   11.6808    2.3043    0.0000 C   0  0  0  0  0  0  0  0  0  0  0  0
   15.5883    0.0724    0.0000 C   0  0  0  0  0  0  0  0  0  0  0  0
   15.5953   -1.4276    0.0000 O   0  0  0  0  0  0  0  0  0  0  0  0
   16.8838    0.8284    0.0000 N   0  0  0  0  0  0  0  0  0  0  0  0
   18.2570    0.2247    0.0000 C   0  0  0  0  0  0  0  0  0  0  0  0
   19.2555    1.3440    0.0000 C   0  0  0  0  0  0  0  0  0  0  0  0
   18.4995    2.6396    0.0000 C   0  0  0  0  0  0  0  0  0  0  0  0
   17.0337    2.3209    0.0000 C   0  0  0  0  0  0  0  0  0  0  0  0
    9.0827    2.2922    0.0000 C   0  0  0  0  0  0  0  0  0  0  0  0
    7.7802    3.0362    0.0000 C   0  0  0  0  0  0  0  0  0  0  0  0
    6.4847    2.2801    0.0000 C   0  0  0  0  0  0  0  0  0  0  0  0
  1  2  1  0  0  0  0
  2  3  1  0  0  0  0
  2 12  2  3  0  0  0
  3  4  1  0  0  0  0
  3  9  2  3  0  0  0
  4  5  2  3  0  0  0
  5  6  1  0  0  0  0
  6  7  1  0  0  0  0
  6  8  2  3  0  0  0
  8  9  1  0  0  0  0
  8 13  1  0  0  0  0
  9 10  1  0  0  0  0
 10 11  2  3  0  0  0
 11 12  1  0  0  0  0
 13 14  1  0  0  0  0
 13 32  2  3  0  0  0
 14 15  2  3  0  0  0
 15 16  1  0  0  0  0
 15 30  1  0  0  0  0
 16 17  1  0  0  0  0
 17 18  1  0  0  0  0
 17 22  2  3  0  0  0
 18 19  2  3  0  0  0
 19 20  1  0  0  0  0
 19 23  1  0  0  0  0
 20 21  2  3  0  0  0
 21 22  1  0  0  0  0
 23 24  2  0  0  0  0
 23 25  1  0  0  0  0
 25 26  1  0  0  0  0
 25 29  1  0  0  0  0
 26 27  1  0  0  0  0
 27 28  1  0  0  0  0
 28 29  1  0  0  0  0
 30 31  2  3  0  0  0
 31 32  1  0  0  0  0
M  END
>  <VC-4>
0

>  <VC-6>
0

>  <SPC-4>
5.0157557

>  <SwHBa>
33.256409

>  <SHCsats>
1.8882873

>  <SHother>
6.1904941

>  <SssCH2>
3.84829

>  <ETA_Shape_Y>
0.34437001

>  <ETA_dBetaP>
-0.070309997

>  <nAtomP>
26

>  <MDEC-24>
0

>  <MDEC-33>
12.101068

>  <MDEC-34>
0

>  <MLFER_A>
0.003

>  <Classification>
1

$$$$
FC(F)(F)C(O)(C(F)(F)F)c1ccc(N([C@@H](C(=O)N2CCCCC2)c2ccccc2)CC)cc1
  MOE2013           2D

 34 36  0  0  1  0  0  0  0  0999 V2000
    0.0000   -0.0000    0.0000 F   0  0  0  0  0  0  0  0  0  0  0  0
    1.4520    0.3763    0.0000 C   0  0  0  0  0  0  0  0  0  0  0  0
    1.8283   -1.0758    0.0000 F   0  0  0  0  0  0  0  0  0  0  0  0
    2.9041    0.7525    0.0000 F   0  0  0  0  0  0  0  0  0  0  0  0
    1.0758    1.8283    0.0000 C   0  0  0  0  0  0  0  0  0  0  0  0
    2.5278    2.2046    0.0000 O   0  0  0  0  0  0  0  0  0  0  0  0
    0.6995    3.2804    0.0000 C   0  0  0  0  0  0  0  0  0  0  0  0
    2.1515    3.6566    0.0000 F   0  0  0  0  0  0  0  0  0  0  0  0
   -0.7525    2.9041    0.0000 F   0  0  0  0  0  0  0  0  0  0  0  0
    0.3232    4.7324    0.0000 F   0  0  0  0  0  0  0  0  0  0  0  0
   -0.3763    1.4520    0.0000 C   0  0  0  0  0  0  0  0  0  0  0  0
   -0.7764    0.0064    0.0000 C   0  0  0  0  0  0  0  0  0  0  0  0
   -2.2285   -0.3699    0.0000 C   0  0  0  0  0  0  0  0  0  0  0  0
   -3.2804    0.6995    0.0000 C   0  0  0  0  0  0  0  0  0  0  0  0
   -4.7324    0.3232    0.0000 N   0  0  3  0  0  0  0  0  0  0  0  0
   -5.7843    1.3926    0.0000 C   0  0  1  0  0  0  0  0  0  0  0  0
   -5.3841    2.8382    0.0000 C   0  0  0  0  0  0  0  0  0  0  0  0
   -3.9321    3.2145    0.0000 O   0  0  0  0  0  0  0  0  0  0  0  0
   -6.4360    3.9076    0.0000 N   0  0  0  0  0  0  0  0  0  0  0  0
   -7.8880    3.5313    0.0000 C   0  0  0  0  0  0  0  0  0  0  0  0
   -8.9399    4.6007    0.0000 C   0  0  0  0  0  0  0  0  0  0  0  0
   -8.5398    6.0463    0.0000 C   0  0  0  0  0  0  0  0  0  0  0  0
   -7.0877    6.4226    0.0000 C   0  0  0  0  0  0  0  0  0  0  0  0
   -6.0358    5.3532    0.0000 C   0  0  0  0  0  0  0  0  0  0  0  0
   -7.2363    1.0163    0.0000 C   0  0  0  0  0  0  0  0  0  0  0  0
   -8.2882    2.0857    0.0000 C   0  0  0  0  0  0  0  0  0  0  0  0
   -9.7402    1.7094    0.0000 C   0  0  0  0  0  0  0  0  0  0  0  0
  -10.1404    0.2638    0.0000 C   0  0  0  0  0  0  0  0  0  0  0  0
   -9.0885   -0.8056    0.0000 C   0  0  0  0  0  0  0  0  0  0  0  0
   -7.6365   -0.4293    0.0000 C   0  0  0  0  0  0  0  0  0  0  0  0
   -5.1325   -1.1224    0.0000 C   0  0  0  0  0  0  0  0  0  0  0  0
   -4.0807   -2.1918    0.0000 C   0  0  0  0  0  0  0  0  0  0  0  0
   -2.8802    2.1451    0.0000 C   0  0  0  0  0  0  0  0  0  0  0  0
   -1.4282    2.5214    0.0000 C   0  0  0  0  0  0  0  0  0  0  0  0
  1  2  1  0  0  0  0
  2  3  1  0  0  0  0
  2  4  1  0  0  0  0
  2  5  1  0  0  0  0
  5  6  1  0  0  0  0
  5  7  1  0  0  0  0
  5 11  1  0  0  0  0
  7  8  1  0  0  0  0
  7  9  1  0  0  0  0
  7 10  1  0  0  0  0
 11 12  1  0  0  0  0
 11 34  2  3  0  0  0
 12 13  2  3  0  0  0
 13 14  1  0  0  0  0
 14 15  1  0  0  0  0
 14 33  2  3  0  0  0
 15 31  1  0  0  0  0
 16 15  1  6  0  0  0
 16 17  1  0  0  0  0
 16 25  1  0  0  0  0
 17 18  2  0  0  0  0
 17 19  1  0  0  0  0
 19 20  1  0  0  0  0
 19 24  1  0  0  0  0
 20 21  1  0  0  0  0
 21 22  1  0  0  0  0
 22 23  1  0  0  0  0
 23 24  1  0  0  0  0
 25 26  1  0  0  0  0
 25 30  2  3  0  0  0
 26 27  2  3  0  0  0
 27 28  1  0  0  0  0
 28 29  2  3  0  0  0
 29 30  1  0  0  0  0
 31 32  1  0  0  0  0
 33 34  1  0  0  0  0
M  END
>  <VC-4>
0.054948311

>  <VC-6>
0.05209782

>  <SPC-4>
8.9998665

>  <SwHBa>
11.565605

>  <SHCsats>
3.6290553

>  <SHother>
5.2716212

>  <SssCH2>
4.176733

>  <ETA_Shape_Y>
0.21738

>  <ETA_dBetaP>
-0.32352999

>  <nAtomP>
7

>  <MDEC-24>
6.3630557

>  <MDEC-33>
3.7250352

>  <MDEC-34>
3.0518303

>  <MLFER_A>
0.85399997

>  <Classification>
0

$$$$
S(=O)(=O)(C)c1cc(ccc1)COc1cc(ccc1)-c1n2c(nc1C(C)C)C(=CC=C2)C(F)(F)F
  MOE2013           2D

 34 37  0  0  0  0  0  0  0  0999 V2000
    0.0000    0.0000    0.0000 S   0  0  0  0  0  0  0  0  0  0  0  0
    0.7541   -1.2967    0.0000 O   0  0  0  0  0  0  0  0  0  0  0  0
   -0.7541    1.2967    0.0000 O   0  0  0  0  0  0  0  0  0  0  0  0
    1.2967    0.7541    0.0000 C   0  0  0  0  0  0  0  0  0  0  0  0
   -1.2967   -0.7541    0.0000 C   0  0  0  0  0  0  0  0  0  0  0  0
   -2.5981   -0.0082    0.0000 C   0  0  0  0  0  0  0  0  0  0  0  0
   -3.8947   -0.7624    0.0000 C   0  0  0  0  0  0  0  0  0  0  0  0
   -3.8900   -2.2624    0.0000 C   0  0  0  0  0  0  0  0  0  0  0  0
   -2.5885   -3.0082    0.0000 C   0  0  0  0  0  0  0  0  0  0  0  0
   -1.2919   -2.2541    0.0000 C   0  0  0  0  0  0  0  0  0  0  0  0
   -5.1961   -0.0165    0.0000 C   0  0  0  0  0  0  0  0  0  0  0  0
   -6.4928   -0.7706    0.0000 O   0  0  0  0  0  0  0  0  0  0  0  0
   -7.7942   -0.0247    0.0000 C   0  0  0  0  0  0  0  0  0  0  0  0
   -9.0908   -0.7788    0.0000 C   0  0  0  0  0  0  0  0  0  0  0  0
  -10.3923   -0.0330    0.0000 C   0  0  0  0  0  0  0  0  0  0  0  0
  -10.3970    1.4670    0.0000 C   0  0  0  0  0  0  0  0  0  0  0  0
   -9.1004    2.2211    0.0000 C   0  0  0  0  0  0  0  0  0  0  0  0
   -7.7989    1.4753    0.0000 C   0  0  0  0  0  0  0  0  0  0  0  0
  -11.6889   -0.7871    0.0000 C   0  0  0  0  0  0  0  0  0  0  0  0
  -11.8410   -2.2794    0.0000 N   0  0  0  0  0  0  0  0  0  0  0  0
  -13.3072   -2.5959    0.0000 C   0  0  0  0  0  0  0  0  0  0  0  0
  -14.0613   -1.2992    0.0000 N   0  0  0  0  0  0  0  0  0  0  0  0
  -13.0612   -0.1813    0.0000 C   0  0  0  0  0  0  0  0  0  0  0  0
  -13.3777    1.2849    0.0000 C   0  0  0  0  0  0  0  0  0  0  0  0
  -12.2661    2.2921    0.0000 C   0  0  0  0  0  0  0  0  0  0  0  0
  -14.8057    1.7439    0.0000 C   0  0  0  0  0  0  0  0  0  0  0  0
  -13.7662   -4.0239    0.0000 C   0  0  0  0  0  0  0  0  0  0  0  0
  -12.7590   -5.1354    0.0000 C   0  0  0  0  0  0  0  0  0  0  0  0
  -11.2927   -4.8189    0.0000 C   0  0  0  0  0  0  0  0  0  0  0  0
  -10.8337   -3.3909    0.0000 C   0  0  0  0  0  0  0  0  0  0  0  0
  -15.2324   -4.3404    0.0000 C   0  0  0  0  0  0  0  0  0  0  0  0
  -16.6986   -4.6570    0.0000 F   0  0  0  0  0  0  0  0  0  0  0  0
  -15.5489   -2.8742    0.0000 F   0  0  0  0  0  0  0  0  0  0  0  0
  -14.9159   -5.8067    0.0000 F   0  0  0  0  0  0  0  0  0  0  0  0
  1  2  2  0  0  0  0
  1  3  2  0  0  0  0
  1  4  1  0  0  0  0
  1  5  1  0  0  0  0
  5  6  1  0  0  0  0
  5 10  2  3  0  0  0
  6  7  2  3  0  0  0
  7  8  1  0  0  0  0
  7 11  1  0  0  0  0
  8  9  2  3  0  0  0
  9 10  1  0  0  0  0
 11 12  1  0  0  0  0
 12 13  1  0  0  0  0
 13 14  1  0  0  0  0
 13 18  2  3  0  0  0
 14 15  2  3  0  0  0
 15 16  1  0  0  0  0
 15 19  1  0  0  0  0
 16 17  2  3  0  0  0
 17 18  1  0  0  0  0
 19 20  1  0  0  0  0
 19 23  2  3  0  0  0
 20 21  1  0  0  0  0
 20 30  1  0  0  0  0
 21 22  2  3  0  0  0
 21 27  1  0  0  0  0
 22 23  1  0  0  0  0
 23 24  1  0  0  0  0
 24 25  1  0  0  0  0
 24 26  1  0  0  0  0
 27 28  2  3  0  0  0
 27 31  1  0  0  0  0
 28 29  1  0  0  0  0
 29 30  2  3  0  0  0
 31 32  1  0  0  0  0
 31 33  1  0  0  0  0
 31 34  1  0  0  0  0
M  END
>  <VC-4>
0.064497903

>  <VC-6>
0.020896472

>  <SPC-4>
6.9877343

>  <SwHBa>
20.18792

>  <SHCsats>
1.6283211

>  <SHother>
6.2916818

>  <SssCH2>
0.15785585

>  <ETA_Shape_Y>
0.30643001

>  <ETA_dBetaP>
-0.125

>  <nAtomP>
16

>  <MDEC-24>
1.7903725

>  <MDEC-33>
9.6069965

>  <MDEC-34>
2.0265486

>  <MLFER_A>
0.003

>  <Classification>
1

$$$$
FC(F)(F)C(O)(C(F)(F)F)c1ccc(N([C@@H](COCC(=O)N(C)C)c2ccccc2)CC)cc1
  MOE2013           2D

 34 35  0  0  1  0  0  0  0  0999 V2000
    0.0000   -0.0000    0.0000 F   0  0  0  0  0  0  0  0  0  0  0  0
    1.0662   -1.0551    0.0000 C   0  0  0  0  0  0  0  0  0  0  0  0
    0.0112   -2.1213    0.0000 F   0  0  0  0  0  0  0  0  0  0  0  0
    2.1325   -2.1101    0.0000 F   0  0  0  0  0  0  0  0  0  0  0  0
    2.1213    0.0112    0.0000 C   0  0  0  0  0  0  0  0  0  0  0  0
    3.1875   -1.0439    0.0000 O   0  0  0  0  0  0  0  0  0  0  0  0
    3.1763    1.0774    0.0000 C   0  0  0  0  0  0  0  0  0  0  0  0
    4.2426    0.0224    0.0000 F   0  0  0  0  0  0  0  0  0  0  0  0
    4.2314    2.1437    0.0000 F   0  0  0  0  0  0  0  0  0  0  0  0
    2.1101    2.1325    0.0000 F   0  0  0  0  0  0  0  0  0  0  0  0
    1.0551    1.0662    0.0000 C   0  0  0  0  0  0  0  0  0  0  0  0
    1.4356    2.5172    0.0000 C   0  0  0  0  0  0  0  0  0  0  0  0
    0.3694    3.5722    0.0000 C   0  0  0  0  0  0  0  0  0  0  0  0
   -1.0774    3.1763    0.0000 C   0  0  0  0  0  0  0  0  0  0  0  0
   -2.1437    4.2314    0.0000 N   0  0  3  0  0  0  0  0  0  0  0  0
   -3.5905    3.8355    0.0000 C   0  0  1  0  0  0  0  0  0  0  0  0
   -3.9711    2.3846    0.0000 C   0  0  0  0  0  0  0  0  0  0  0  0
   -5.4179    1.9888    0.0000 O   0  0  0  0  0  0  0  0  0  0  0  0
   -5.7985    0.5378    0.0000 C   0  0  0  0  0  0  0  0  0  0  0  0
   -7.2453    0.1420    0.0000 C   0  0  0  0  0  0  0  0  0  0  0  0
   -8.3115    1.1970    0.0000 O   0  0  0  0  0  0  0  0  0  0  0  0
   -7.6259   -1.3089    0.0000 N   0  0  0  0  0  0  0  0  0  0  0  0
   -6.5596   -2.3640    0.0000 C   0  0  0  0  0  0  0  0  0  0  0  0
   -9.0727   -1.7048    0.0000 C   0  0  0  0  0  0  0  0  0  0  0  0
   -4.6567    4.8906    0.0000 C   0  0  0  0  0  0  0  0  0  0  0  0
   -4.2761    6.3415    0.0000 C   0  0  0  0  0  0  0  0  0  0  0  0
   -5.3424    7.3966    0.0000 C   0  0  0  0  0  0  0  0  0  0  0  0
   -6.7892    7.0007    0.0000 C   0  0  0  0  0  0  0  0  0  0  0  0
   -7.1698    5.5498    0.0000 C   0  0  0  0  0  0  0  0  0  0  0  0
   -6.1035    4.4947    0.0000 C   0  0  0  0  0  0  0  0  0  0  0  0
   -1.7631    5.6823    0.0000 C   0  0  0  0  0  0  0  0  0  0  0  0
   -0.3162    6.0782    0.0000 C   0  0  0  0  0  0  0  0  0  0  0  0
   -1.4580    1.7254    0.0000 C   0  0  0  0  0  0  0  0  0  0  0  0
   -0.3918    0.6704    0.0000 C   0  0  0  0  0  0  0  0  0  0  0  0
  1  2  1  0  0  0  0
  2  3  1  0  0  0  0
  2  4  1  0  0  0  0
  2  5  1  0  0  0  0
  5  6  1  0  0  0  0
  5  7  1  0  0  0  0
  5 11  1  0  0  0  0
  7  8  1  0  0  0  0
  7  9  1  0  0  0  0
  7 10  1  0  0  0  0
 11 12  1  0  0  0  0
 11 34  2  3  0  0  0
 12 13  2  3  0  0  0
 13 14  1  0  0  0  0
 14 15  1  0  0  0  0
 14 33  2  3  0  0  0
 15 31  1  0  0  0  0
 16 15  1  1  0  0  0
 16 17  1  0  0  0  0
 16 25  1  0  0  0  0
 17 18  1  0  0  0  0
 18 19  1  0  0  0  0
 19 20  1  0  0  0  0
 20 21  2  0  0  0  0
 20 22  1  0  0  0  0
 22 23  1  0  0  0  0
 22 24  1  0  0  0  0
 25 26  1  0  0  0  0
 25 30  2  3  0  0  0
 26 27  2  3  0  0  0
 27 28  1  0  0  0  0
 28 29  2  3  0  0  0
 29 30  1  0  0  0  0
 31 32  1  0  0  0  0
 33 34  1  0  0  0  0
M  END
>  <VC-4>
0.054948311

>  <VC-6>
0.05209782

>  <SPC-4>
9.2416296

>  <SwHBa>
11.802443

>  <SHCsats>
2.869426

>  <SHother>
5.2907691

>  <SssCH2>
0.16463491

>  <ETA_Shape_Y>
0.21979

>  <ETA_dBetaP>
-0.32352999

>  <nAtomP>
7

>  <MDEC-24>
5.7933879

>  <MDEC-33>
2.651052

>  <MDEC-34>
2.8562303

>  <MLFER_A>
0.85399997

>  <Classification>
0

$$$$
FC(F)(F)c1c2ncc(C)c(c2ccc1)-c1cc(ccc1)CNc1c2c(ccc1)c(ccc2)CC(=O)[O-]
  MOE2013           2D

 37 41  0  0  0  0  0  0  0  0999 V2000
   -0.0000    0.0000    0.0000 F   0  0  0  0  0  0  0  0  0  0  0  0
    0.7871    1.2769    0.0000 C   0  0  0  0  0  0  0  0  0  0  0  0
   -0.4898    2.0640    0.0000 F   0  0  0  0  0  0  0  0  0  0  0  0
    1.5742    2.5538    0.0000 F   0  0  0  0  0  0  0  0  0  0  0  0
    2.0640    0.4898    0.0000 C   0  0  0  0  0  0  0  0  0  0  0  0
    3.3841    1.2021    0.0000 C   0  0  0  0  0  0  0  0  0  0  0  0
    3.4273    2.7015    0.0000 N   0  0  0  0  0  0  0  0  0  0  0  0
    4.7474    3.4138    0.0000 C   0  0  0  0  0  0  0  0  0  0  0  0
    6.0243    2.6267    0.0000 C   0  0  0  0  0  0  0  0  0  0  0  0
    7.3444    3.3389    0.0000 C   0  0  0  0  0  0  0  0  0  0  0  0
    5.9811    1.1273    0.0000 C   0  0  0  0  0  0  0  0  0  0  0  0
    4.6610    0.4150    0.0000 C   0  0  0  0  0  0  0  0  0  0  0  0
    4.6178   -1.0844    0.0000 C   0  0  0  0  0  0  0  0  0  0  0  0
    3.2977   -1.7967    0.0000 C   0  0  0  0  0  0  0  0  0  0  0  0
    2.0208   -1.0096    0.0000 C   0  0  0  0  0  0  0  0  0  0  0  0
    7.2580    0.3402    0.0000 C   0  0  0  0  0  0  0  0  0  0  0  0
    8.5781    1.0525    0.0000 C   0  0  0  0  0  0  0  0  0  0  0  0
    9.8550    0.2654    0.0000 C   0  0  0  0  0  0  0  0  0  0  0  0
    9.8118   -1.2340    0.0000 C   0  0  0  0  0  0  0  0  0  0  0  0
    8.4917   -1.9463    0.0000 C   0  0  0  0  0  0  0  0  0  0  0  0
    7.2148   -1.1592    0.0000 C   0  0  0  0  0  0  0  0  0  0  0  0
   11.1751    0.9777    0.0000 C   0  0  0  0  0  0  0  0  0  0  0  0
   12.4520    0.1906    0.0000 N   0  0  0  0  0  0  0  0  0  0  0  0
   13.7721    0.9028    0.0000 C   0  0  0  0  0  0  0  0  0  0  0  0
   15.0490    0.1157    0.0000 C   0  0  0  0  0  0  0  0  0  0  0  0
   16.3691    0.8280    0.0000 C   0  0  0  0  0  0  0  0  0  0  0  0
   16.4123    2.3274    0.0000 C   0  0  0  0  0  0  0  0  0  0  0  0
   15.1354    3.1145    0.0000 C   0  0  0  0  0  0  0  0  0  0  0  0
   13.8153    2.4022    0.0000 C   0  0  0  0  0  0  0  0  0  0  0  0
   17.6460    0.0409    0.0000 C   0  0  0  0  0  0  0  0  0  0  0  0
   17.6028   -1.4584    0.0000 C   0  0  0  0  0  0  0  0  0  0  0  0
   16.2827   -2.1707    0.0000 C   0  0  0  0  0  0  0  0  0  0  0  0
   15.0058   -1.3836    0.0000 C   0  0  0  0  0  0  0  0  0  0  0  0
   18.9661    0.7532    0.0000 C   0  0  0  0  0  0  0  0  0  0  0  0
   20.2430   -0.0339    0.0000 C   0  0  0  0  0  0  0  0  0  0  0  0
   21.5631    0.6784    0.0000 O   0  0  0  0  0  0  0  0  0  0  0  0
   20.1998   -1.5333    0.0000 O   0  5  0  0  0  0  0  0  0  0  0  0
  1  2  1  0  0  0  0
  2  3  1  0  0  0  0
  2  4  1  0  0  0  0
  2  5  1  0  0  0  0
  5  6  1  0  0  0  0
  5 15  2  3  0  0  0
  6  7  1  0  0  0  0
  6 12  2  3  0  0  0
  7  8  2  3  0  0  0
  8  9  1  0  0  0  0
  9 10  1  0  0  0  0
  9 11  2  3  0  0  0
 11 12  1  0  0  0  0
 11 16  1  0  0  0  0
 12 13  1  0  0  0  0
 13 14  2  3  0  0  0
 14 15  1  0  0  0  0
 16 17  1  0  0  0  0
 16 21  2  3  0  0  0
 17 18  2  3  0  0  0
 18 19  1  0  0  0  0
 18 22  1  0  0  0  0
 19 20  2  3  0  0  0
 20 21  1  0  0  0  0
 22 23  1  0  0  0  0
 23 24  1  0  0  0  0
 24 25  1  0  0  0  0
 24 29  2  3  0  0  0
 25 26  1  0  0  0  0
 25 33  2  3  0  0  0
 26 27  1  0  0  0  0
 26 30  2  3  0  0  0
 27 28  2  3  0  0  0
 28 29  1  0  0  0  0
 30 31  1  0  0  0  0
 30 34  1  0  0  0  0
 31 32  2  3  0  0  0
 32 33  1  0  0  0  0
 34 35  1  0  0  0  0
 35 36  2  0  0  0  0
 35 37  1  0  0  0  0
M  CHG  1  37  -1
M  END
>  <VC-4>
0.013498731

>  <VC-6>
0.0038967479

>  <SPC-4>
6.3460541

>  <SwHBa>
29.499826

>  <SHCsats>
0

>  <SHother>
7.5803585

>  <SssCH2>
0.29728553

>  <ETA_Shape_Y>
0.34634

>  <ETA_dBetaP>
-0.0473

>  <nAtomP>
16

>  <MDEC-24>
2.1615269

>  <MDEC-33>
14.846919

>  <MDEC-34>
2.1201167

>  <MLFER_A>
0.44

>  <Classification>
1

$$$$
Clc1c2ncc(C)c(c2ccc1)-c1cc(Oc2cc(ccc2)C(=O)NCCC)ccc1
  MOE2013           2D

 31 34  0  0  0  0  0  0  0  0999 V2000
    0.0000    0.0000    0.0000 Cl  0  0  0  0  0  0  0  0  0  0  0  0
    1.3012    0.7463    0.0000 C   0  0  0  0  0  0  0  0  0  0  0  0
    2.5981   -0.0074    0.0000 C   0  0  0  0  0  0  0  0  0  0  0  0
    2.5938   -1.5074    0.0000 N   0  0  0  0  0  0  0  0  0  0  0  0
    3.8907   -2.2611    0.0000 C   0  0  0  0  0  0  0  0  0  0  0  0
    5.1919   -1.5148    0.0000 C   0  0  0  0  0  0  0  0  0  0  0  0
    6.4888   -2.2685    0.0000 C   0  0  0  0  0  0  0  0  0  0  0  0
    5.1961   -0.0148    0.0000 C   0  0  0  0  0  0  0  0  0  0  0  0
    3.8992    0.7389    0.0000 C   0  0  0  0  0  0  0  0  0  0  0  0
    3.9035    2.2389    0.0000 C   0  0  0  0  0  0  0  0  0  0  0  0
    2.6066    2.9926    0.0000 C   0  0  0  0  0  0  0  0  0  0  0  0
    1.3054    2.2463    0.0000 C   0  0  0  0  0  0  0  0  0  0  0  0
    6.4973    0.7315    0.0000 C   0  0  0  0  0  0  0  0  0  0  0  0
    7.7942   -0.0222    0.0000 C   0  0  0  0  0  0  0  0  0  0  0  0
    9.0954    0.7241    0.0000 C   0  0  0  0  0  0  0  0  0  0  0  0
   10.3923   -0.0296    0.0000 O   0  0  0  0  0  0  0  0  0  0  0  0
   11.6934    0.7167    0.0000 C   0  0  0  0  0  0  0  0  0  0  0  0
   12.9903   -0.0370    0.0000 C   0  0  0  0  0  0  0  0  0  0  0  0
   14.2915    0.7093    0.0000 C   0  0  0  0  0  0  0  0  0  0  0  0
   14.2958    2.2093    0.0000 C   0  0  0  0  0  0  0  0  0  0  0  0
   12.9989    2.9630    0.0000 C   0  0  0  0  0  0  0  0  0  0  0  0
   11.6977    2.2167    0.0000 C   0  0  0  0  0  0  0  0  0  0  0  0
   15.5884   -0.0444    0.0000 C   0  0  0  0  0  0  0  0  0  0  0  0
   15.5841   -1.5444    0.0000 O   0  0  0  0  0  0  0  0  0  0  0  0
   16.8896    0.7019    0.0000 N   0  0  0  0  0  0  0  0  0  0  0  0
   18.1865   -0.0518    0.0000 C   0  0  0  0  0  0  0  0  0  0  0  0
   19.4876    0.6945    0.0000 C   0  0  0  0  0  0  0  0  0  0  0  0
   20.7845   -0.0592    0.0000 C   0  0  0  0  0  0  0  0  0  0  0  0
    9.0996    2.2241    0.0000 C   0  0  0  0  0  0  0  0  0  0  0  0
    7.8027    2.9778    0.0000 C   0  0  0  0  0  0  0  0  0  0  0  0
    6.5016    2.2315    0.0000 C   0  0  0  0  0  0  0  0  0  0  0  0
  1  2  1  0  0  0  0
  2  3  1  0  0  0  0
  2 12  2  3  0  0  0
  3  4  1  0  0  0  0
  3  9  2  3  0  0  0
  4  5  2  3  0  0  0
  5  6  1  0  0  0  0
  6  7  1  0  0  0  0
  6  8  2  3  0  0  0
  8  9  1  0  0  0  0
  8 13  1  0  0  0  0
  9 10  1  0  0  0  0
 10 11  2  3  0  0  0
 11 12  1  0  0  0  0
 13 14  1  0  0  0  0
 13 31  2  3  0  0  0
 14 15  2  3  0  0  0
 15 16  1  0  0  0  0
 15 29  1  0  0  0  0
 16 17  1  0  0  0  0
 17 18  1  0  0  0  0
 17 22  2  3  0  0  0
 18 19  2  3  0  0  0
 19 20  1  0  0  0  0
 19 23  1  0  0  0  0
 20 21  2  3  0  0  0
 21 22  1  0  0  0  0
 23 24  2  0  0  0  0
 23 25  1  0  0  0  0
 25 26  1  0  0  0  0
 26 27  1  0  0  0  0
 27 28  1  0  0  0  0
 29 30  2  3  0  0  0
 30 31  1  0  0  0  0
M  END
>  <VC-4>
0

>  <VC-6>
0

>  <SPC-4>
4.4944568

>  <SwHBa>
32.601589

>  <SHCsats>
1.2851188

>  <SHother>
6.2463546

>  <SssCH2>
1.5630339

>  <ETA_Shape_Y>
0.32936001

>  <ETA_dBetaP>
-0.032260001

>  <nAtomP>
26

>  <MDEC-24>
0

>  <MDEC-33>
12.101068

>  <MDEC-34>
0

>  <MLFER_A>
0.37099999

>  <Classification>
1

$$$$
S(=O)(=O)(C)c1cc(ccc1)-c1cc(ccc1)-c1c2c(ncc1CC)c(ccc2)C(F)(F)F
  MOE2013           2D

 32 35  0  0  0  0  0  0  0  0999 V2000
   -0.0000   -0.0000    0.0000 S   0  0  0  0  0  0  0  0  0  0  0  0
    0.7537    1.2969    0.0000 O   0  0  0  0  0  0  0  0  0  0  0  0
   -0.7537   -1.2969    0.0000 O   0  0  0  0  0  0  0  0  0  0  0  0
    1.2969   -0.7537    0.0000 C   0  0  0  0  0  0  0  0  0  0  0  0
   -1.2969    0.7537    0.0000 C   0  0  0  0  0  0  0  0  0  0  0  0
   -2.5981    0.0074    0.0000 C   0  0  0  0  0  0  0  0  0  0  0  0
   -3.8949    0.7612    0.0000 C   0  0  0  0  0  0  0  0  0  0  0  0
   -3.8907    2.2612    0.0000 C   0  0  0  0  0  0  0  0  0  0  0  0
   -2.5895    3.0074    0.0000 C   0  0  0  0  0  0  0  0  0  0  0  0
   -1.2926    2.2537    0.0000 C   0  0  0  0  0  0  0  0  0  0  0  0
   -5.1961    0.0149    0.0000 C   0  0  0  0  0  0  0  0  0  0  0  0
   -6.4930    0.7686    0.0000 C   0  0  0  0  0  0  0  0  0  0  0  0
   -7.7942    0.0223    0.0000 C   0  0  0  0  0  0  0  0  0  0  0  0
   -7.7985   -1.4777    0.0000 C   0  0  0  0  0  0  0  0  0  0  0  0
   -6.5016   -2.2314    0.0000 C   0  0  0  0  0  0  0  0  0  0  0  0
   -5.2004   -1.4851    0.0000 C   0  0  0  0  0  0  0  0  0  0  0  0
   -9.0911    0.7761    0.0000 C   0  0  0  0  0  0  0  0  0  0  0  0
  -10.3923    0.0298    0.0000 C   0  0  0  0  0  0  0  0  0  0  0  0
  -11.6891    0.7835    0.0000 C   0  0  0  0  0  0  0  0  0  0  0  0
  -11.6848    2.2835    0.0000 N   0  0  0  0  0  0  0  0  0  0  0  0
  -10.3837    3.0298    0.0000 C   0  0  0  0  0  0  0  0  0  0  0  0
   -9.0868    2.2760    0.0000 C   0  0  0  0  0  0  0  0  0  0  0  0
   -7.7856    3.0223    0.0000 C   0  0  0  0  0  0  0  0  0  0  0  0
   -7.7813    4.5223    0.0000 C   0  0  0  0  0  0  0  0  0  0  0  0
  -12.9903    0.0372    0.0000 C   0  0  0  0  0  0  0  0  0  0  0  0
  -12.9946   -1.4628    0.0000 C   0  0  0  0  0  0  0  0  0  0  0  0
  -11.6977   -2.2165    0.0000 C   0  0  0  0  0  0  0  0  0  0  0  0
  -10.3966   -1.4702    0.0000 C   0  0  0  0  0  0  0  0  0  0  0  0
  -14.2872    0.7909    0.0000 C   0  0  0  0  0  0  0  0  0  0  0  0
  -15.5841    1.5447    0.0000 F   0  0  0  0  0  0  0  0  0  0  0  0
  -15.0409   -0.5059    0.0000 F   0  0  0  0  0  0  0  0  0  0  0  0
  -13.5335    2.0878    0.0000 F   0  0  0  0  0  0  0  0  0  0  0  0
  1  2  2  0  0  0  0
  1  3  2  0  0  0  0
  1  4  1  0  0  0  0
  1  5  1  0  0  0  0
  5  6  1  0  0  0  0
  5 10  2  3  0  0  0
  6  7  2  3  0  0  0
  7  8  1  0  0  0  0
  7 11  1  0  0  0  0
  8  9  2  3  0  0  0
  9 10  1  0  0  0  0
 11 12  1  0  0  0  0
 11 16  2  3  0  0  0
 12 13  2  3  0  0  0
 13 14  1  0  0  0  0
 13 17  1  0  0  0  0
 14 15  2  3  0  0  0
 15 16  1  0  0  0  0
 17 18  1  0  0  0  0
 17 22  2  3  0  0  0
 18 19  1  0  0  0  0
 18 28  2  3  0  0  0
 19 20  1  0  0  0  0
 19 25  2  3  0  0  0
 20 21  2  3  0  0  0
 21 22  1  0  0  0  0
 22 23  1  0  0  0  0
 23 24  1  0  0  0  0
 25 26  1  0  0  0  0
 25 29  1  0  0  0  0
 26 27  2  3  0  0  0
 27 28  1  0  0  0  0
 29 30  1  0  0  0  0
 29 31  1  0  0  0  0
 29 32  1  0  0  0  0
M  END
>  <VC-4>
0.064497903

>  <VC-6>
0.020896472

>  <SPC-4>
6.6472611

>  <SwHBa>
23.657814

>  <SHCsats>
1.0350469

>  <SHother>
6.5578561

>  <SssCH2>
0.60543972

>  <ETA_Shape_Y>
0.29493999

>  <ETA_dBetaP>
-0.015629999

>  <nAtomP>
25

>  <MDEC-24>
2.2058442

>  <MDEC-33>
11.75175

>  <MDEC-34>
2.1887937

>  <MLFER_A>
0.003

>  <Classification>
0

$$$$
S(=O)(=O)(C)c1cc(Oc2cc(ccc2)-c2n3c(nc2C(C)(C)C)C(=CC=C3)C(F)(F)F)ccc1
  MOE2013           2D

 34 37  0  0  0  0  0  0  0  0999 V2000
    0.0000   -0.0000    0.0000 S   0  0  0  0  0  0  0  0  0  0  0  0
    0.7422   -1.3035    0.0000 O   0  0  0  0  0  0  0  0  0  0  0  0
   -0.7422    1.3035    0.0000 O   0  0  0  0  0  0  0  0  0  0  0  0
   -1.3035   -0.7422    0.0000 C   0  0  0  0  0  0  0  0  0  0  0  0
    1.3035    0.7422    0.0000 C   0  0  0  0  0  0  0  0  0  0  0  0
    2.5980   -0.0156    0.0000 C   0  0  0  0  0  0  0  0  0  0  0  0
    3.9015    0.7266    0.0000 C   0  0  0  0  0  0  0  0  0  0  0  0
    5.1961   -0.0312    0.0000 O   0  0  0  0  0  0  0  0  0  0  0  0
    6.4996    0.7110    0.0000 C   0  0  0  0  0  0  0  0  0  0  0  0
    7.7941   -0.0467    0.0000 C   0  0  0  0  0  0  0  0  0  0  0  0
    9.0976    0.6954    0.0000 C   0  0  0  0  0  0  0  0  0  0  0  0
    9.1066    2.1954    0.0000 C   0  0  0  0  0  0  0  0  0  0  0  0
    7.8121    2.9532    0.0000 C   0  0  0  0  0  0  0  0  0  0  0  0
    6.5086    2.2110    0.0000 C   0  0  0  0  0  0  0  0  0  0  0  0
   10.3921   -0.0623    0.0000 C   0  0  0  0  0  0  0  0  0  0  0  0
   10.5400   -1.5550    0.0000 N   0  0  0  0  0  0  0  0  0  0  0  0
   12.0053   -1.8757    0.0000 C   0  0  0  0  0  0  0  0  0  0  0  0
   12.7631   -0.5812    0.0000 N   0  0  0  0  0  0  0  0  0  0  0  0
   11.7661    0.5395    0.0000 C   0  0  0  0  0  0  0  0  0  0  0  0
   12.0867    2.0049    0.0000 C   0  0  0  0  0  0  0  0  0  0  0  0
   12.4074    3.4702    0.0000 C   0  0  0  0  0  0  0  0  0  0  0  0
   10.6214    2.3255    0.0000 C   0  0  0  0  0  0  0  0  0  0  0  0
   13.5521    1.6842    0.0000 C   0  0  0  0  0  0  0  0  0  0  0  0
   12.4602   -3.3050    0.0000 C   0  0  0  0  0  0  0  0  0  0  0  0
   11.4499   -4.4137    0.0000 C   0  0  0  0  0  0  0  0  0  0  0  0
    9.9846   -4.0930    0.0000 C   0  0  0  0  0  0  0  0  0  0  0  0
    9.5296   -2.6637    0.0000 C   0  0  0  0  0  0  0  0  0  0  0  0
   13.9256   -3.6257    0.0000 C   0  0  0  0  0  0  0  0  0  0  0  0
   13.6049   -5.0910    0.0000 F   0  0  0  0  0  0  0  0  0  0  0  0
   14.2462   -2.1604    0.0000 F   0  0  0  0  0  0  0  0  0  0  0  0
   15.3909   -3.9464    0.0000 F   0  0  0  0  0  0  0  0  0  0  0  0
    3.9105    2.2266    0.0000 C   0  0  0  0  0  0  0  0  0  0  0  0
    2.6160    2.9844    0.0000 C   0  0  0  0  0  0  0  0  0  0  0  0
    1.3125    2.2422    0.0000 C   0  0  0  0  0  0  0  0  0  0  0  0
  1  2  2  0  0  0  0
  1  3  2  0  0  0  0
  1  4  1  0  0  0  0
  1  5  1  0  0  0  0
  5  6  1  0  0  0  0
  5 34  2  3  0  0  0
  6  7  2  3  0  0  0
  7  8  1  0  0  0  0
  7 32  1  0  0  0  0
  8  9  1  0  0  0  0
  9 10  1  0  0  0  0
  9 14  2  3  0  0  0
 10 11  2  3  0  0  0
 11 12  1  0  0  0  0
 11 15  1  0  0  0  0
 12 13  2  3  0  0  0
 13 14  1  0  0  0  0
 15 16  1  0  0  0  0
 15 19  2  3  0  0  0
 16 17  1  0  0  0  0
 16 27  1  0  0  0  0
 17 18  2  3  0  0  0
 17 24  1  0  0  0  0
 18 19  1  0  0  0  0
 19 20  1  0  0  0  0
 20 21  1  0  0  0  0
 20 22  1  0  0  0  0
 20 23  1  0  0  0  0
 24 25  2  3  0  0  0
 24 28  1  0  0  0  0
 25 26  1  0  0  0  0
 26 27  2  3  0  0  0
 28 29  1  0  0  0  0
 28 30  1  0  0  0  0
 28 31  1  0  0  0  0
 32 33  2  3  0  0  0
 33 34  1  0  0  0  0
M  END
>  <VC-4>
0.31449792

>  <VC-6>
0.076798171

>  <SPC-4>
7.6601968

>  <SwHBa>
18.967506

>  <SHCsats>
1.4834493

>  <SHother>
6.5060625

>  <SssCH2>
0

>  <ETA_Shape_Y>
0.27516001

>  <ETA_dBetaP>
-0.125

>  <nAtomP>
25

>  <MDEC-24>
3.6180193

>  <MDEC-33>
7.9527645

>  <MDEC-34>
4.1360803

>  <MLFER_A>
0.003

>  <Classification>
1

$$$$
FC(F)(F)C(O)(C(F)(F)F)c1ccc(N([C@@H](C(OC)=O)c2ccccc2)CC)cc1
  MOE2013           2D

 30 31  0  0  1  0  0  0  0  0999 V2000
    0.0000    0.0000    0.0000 F   0  0  0  0  0  0  0  0  0  0  0  0
    1.4689    0.3037    0.0000 C   0  0  0  0  0  0  0  0  0  0  0  0
    2.9379    0.6074    0.0000 F   0  0  0  0  0  0  0  0  0  0  0  0
    1.1653    1.7726    0.0000 F   0  0  0  0  0  0  0  0  0  0  0  0
    1.7726   -1.1653    0.0000 C   0  0  0  0  0  0  0  0  0  0  0  0
    0.3037   -1.4689    0.0000 O   0  0  0  0  0  0  0  0  0  0  0  0
    2.0763   -2.6342    0.0000 C   0  0  0  0  0  0  0  0  0  0  0  0
    2.3800   -4.1031    0.0000 F   0  0  0  0  0  0  0  0  0  0  0  0
    0.6074   -2.9379    0.0000 F   0  0  0  0  0  0  0  0  0  0  0  0
    3.5452   -2.3305    0.0000 F   0  0  0  0  0  0  0  0  0  0  0  0
    3.2416   -0.8616    0.0000 C   0  0  0  0  0  0  0  0  0  0  0  0
    4.2390   -1.9819    0.0000 C   0  0  0  0  0  0  0  0  0  0  0  0
    5.7080   -1.6782    0.0000 C   0  0  0  0  0  0  0  0  0  0  0  0
    6.1794   -0.2542    0.0000 C   0  0  0  0  0  0  0  0  0  0  0  0
    7.6484    0.0495    0.0000 N   0  0  3  0  0  0  0  0  0  0  0  0
    8.6458   -1.0708    0.0000 C   0  0  1  0  0  0  0  0  0  0  0  0
    8.1744   -2.4948    0.0000 C   0  0  0  0  0  0  0  0  0  0  0  0
    9.1718   -3.6151    0.0000 O   0  0  0  0  0  0  0  0  0  0  0  0
    8.7003   -5.0391    0.0000 C   0  0  0  0  0  0  0  0  0  0  0  0
    6.7054   -2.7985    0.0000 O   0  0  0  0  0  0  0  0  0  0  0  0
   10.1148   -0.7672    0.0000 C   0  0  0  0  0  0  0  0  0  0  0  0
   11.1122   -1.8875    0.0000 C   0  0  0  0  0  0  0  0  0  0  0  0
   12.5812   -1.5838    0.0000 C   0  0  0  0  0  0  0  0  0  0  0  0
   13.0526   -0.1598    0.0000 C   0  0  0  0  0  0  0  0  0  0  0  0
   12.0552    0.9605    0.0000 C   0  0  0  0  0  0  0  0  0  0  0  0
   10.5862    0.6568    0.0000 C   0  0  0  0  0  0  0  0  0  0  0  0
    8.1198    1.4734    0.0000 C   0  0  0  0  0  0  0  0  0  0  0  0
    7.1224    2.5937    0.0000 C   0  0  0  0  0  0  0  0  0  0  0  0
    5.1820    0.8661    0.0000 C   0  0  0  0  0  0  0  0  0  0  0  0
    3.7130    0.5624    0.0000 C   0  0  0  0  0  0  0  0  0  0  0  0
  1  2  1  0  0  0  0
  2  3  1  0  0  0  0
  2  4  1  0  0  0  0
  2  5  1  0  0  0  0
  5  6  1  0  0  0  0
  5  7  1  0  0  0  0
  5 11  1  0  0  0  0
  7  8  1  0  0  0  0
  7  9  1  0  0  0  0
  7 10  1  0  0  0  0
 11 12  1  0  0  0  0
 11 30  2  3  0  0  0
 12 13  2  3  0  0  0
 13 14  1  0  0  0  0
 14 15  1  0  0  0  0
 14 29  2  3  0  0  0
 15 27  1  0  0  0  0
 16 15  1  6  0  0  0
 16 17  1  0  0  0  0
 16 21  1  0  0  0  0
 17 18  1  0  0  0  0
 17 20  2  0  0  0  0
 18 19  1  0  0  0  0
 21 22  1  0  0  0  0
 21 26  2  3  0  0  0
 22 23  2  3  0  0  0
 23 24  1  0  0  0  0
 24 25  2  3  0  0  0
 25 26  1  0  0  0  0
 27 28  1  0  0  0  0
 29 30  1  0  0  0  0
M  END
>  <VC-4>
0.054948311

>  <VC-6>
0.05209782

>  <SPC-4>
8.52917

>  <SwHBa>
10.073413

>  <SHCsats>
1.2209656

>  <SHother>
5.5416398

>  <SssCH2>
0.19128685

>  <ETA_Shape_Y>
0.22113

>  <ETA_dBetaP>
-0.27500001

>  <nAtomP>
7

>  <MDEC-24>
5.1514335

>  <MDEC-33>
3.7250352

>  <MDEC-34>
3.0518303

>  <MLFER_A>
0.85399997

>  <Classification>
0

$$$$
O=C(NCC1(CCCCC1)c1ccccc1)[C@@]1([C@@H]2CCc3c(cccc3)[C@]2(CCC1)C)C
  MOE2013           2D

 32 36  0  0  1  0  0  0  0  0999 V2000
   -0.0000    0.0000    0.0000 O   0  0  0  0  0  0  0  0  0  0  0  0
    0.7447    1.3021    0.0000 C   0  0  0  0  0  0  0  0  0  0  0  0
   -0.0107    2.5981    0.0000 N   0  0  0  0  0  0  0  0  0  0  0  0
   -1.5107    2.5919    0.0000 C   0  0  0  0  0  0  0  0  0  0  0  0
   -2.2660    3.8878    0.0000 C   0  0  0  0  0  0  0  0  0  0  0  0
   -0.9701    4.6432    0.0000 C   0  0  0  0  0  0  0  0  0  0  0  0
   -0.9762    6.1432    0.0000 C   0  0  0  0  0  0  0  0  0  0  0  0
   -2.2783    6.8878    0.0000 C   0  0  0  0  0  0  0  0  0  0  0  0
   -3.5743    6.1325    0.0000 C   0  0  0  0  0  0  0  0  0  0  0  0
   -3.5681    4.6325    0.0000 C   0  0  0  0  0  0  0  0  0  0  0  0
   -3.0107    2.5857    0.0000 C   0  0  0  0  0  0  0  0  0  0  0  0
   -4.5106    2.5796    0.0000 C   0  0  0  0  0  0  0  0  0  0  0  0
   -5.2553    1.2774    0.0000 C   0  0  0  0  0  0  0  0  0  0  0  0
   -4.5000   -0.0185    0.0000 C   0  0  0  0  0  0  0  0  0  0  0  0
   -3.0000   -0.0123    0.0000 C   0  0  0  0  0  0  0  0  0  0  0  0
   -2.2553    1.2898    0.0000 C   0  0  0  0  0  0  0  0  0  0  0  0
    2.2446    1.3083    0.0000 C   0  0  2  0  0  0  0  0  0  0  0  0
    3.5468    0.5636    0.0000 C   0  0  2  0  0  0  0  0  0  0  0  0
    3.5529   -0.9364    0.0000 C   0  0  0  0  0  0  0  0  0  0  0  0
    4.8550   -1.6810    0.0000 C   0  0  0  0  0  0  0  0  0  0  0  0
    6.1510   -0.9257    0.0000 C   0  0  0  0  0  0  0  0  0  0  0  0
    6.1448    0.5743    0.0000 C   0  0  0  0  0  0  0  0  0  0  0  0
    7.4407    1.3296    0.0000 C   0  0  0  0  0  0  0  0  0  0  0  0
    8.7429    0.5850    0.0000 C   0  0  0  0  0  0  0  0  0  0  0  0
    8.7490   -0.9150    0.0000 C   0  0  0  0  0  0  0  0  0  0  0  0
    7.4531   -1.6703    0.0000 C   0  0  0  0  0  0  0  0  0  0  0  0
    4.8427    1.3190    0.0000 C   0  0  1  0  0  0  0  0  0  0  0  0
    4.8365    2.8189    0.0000 C   0  0  0  0  0  0  0  0  0  0  0  0
    3.5344    3.5636    0.0000 C   0  0  0  0  0  0  0  0  0  0  0  0
    2.2385    2.8083    0.0000 C   0  0  0  0  0  0  0  0  0  0  0  0
    6.1386    2.0743    0.0000 C   0  0  0  0  0  0  0  0  0  0  0  0
    1.5000    0.0062    0.0000 C   0  0  0  0  0  0  0  0  0  0  0  0
  1  2  2  0  0  0  0
  2  3  1  0  0  0  0
  3  4  1  0  0  0  0
  4  5  1  0  0  0  0
  5  6  1  0  0  0  0
  5 10  1  0  0  0  0
  5 11  1  0  0  0  0
  6  7  1  0  0  0  0
  7  8  1  0  0  0  0
  8  9  1  0  0  0  0
  9 10  1  0  0  0  0
 11 12  1  0  0  0  0
 11 16  2  3  0  0  0
 12 13  2  3  0  0  0
 13 14  1  0  0  0  0
 14 15  2  3  0  0  0
 15 16  1  0  0  0  0
 17  2  1  1  0  0  0
 17 18  1  0  0  0  0
 17 30  1  0  0  0  0
 17 32  1  6  0  0  0
 18 19  1  1  0  0  0
 18 27  1  0  0  0  0
 19 20  1  0  0  0  0
 20 21  1  0  0  0  0
 21 22  2  3  0  0  0
 21 26  1  0  0  0  0
 22 23  1  0  0  0  0
 22 27  1  0  0  0  0
 23 24  2  3  0  0  0
 24 25  1  0  0  0  0
 25 26  2  3  0  0  0
 27 28  1  0  0  0  0
 27 31  1  1  0  0  0
 28 29  1  0  0  0  0
 29 30  1  0  0  0  0
M  END
>  <VC-4>
0.29251251

>  <VC-6>
0.15192768

>  <SPC-4>
7.6008062

>  <SwHBa>
24.653366

>  <SHCsats>
5.3471308

>  <SHother>
3.2652583

>  <SssCH2>
12.573724

>  <ETA_Shape_Y>
0.15889999

>  <ETA_dBetaP>
-0.25781

>  <nAtomP>
6

>  <MDEC-24>
14.485548

>  <MDEC-33>
2.7429917

>  <MDEC-34>
5.6804047

>  <MLFER_A>
0.37099999

>  <Classification>
0

$$$$
Clc1c(cccc1C(F)(F)F)COc1cc(ccc1)-c1c2c(nnc1Cc1ccccc1)c(Cl)ccc2
  MOE2013           2D

 37 41  0  0  0  0  0  0  0  0999 V2000
   -0.0000    0.0000    0.0000 Cl  0  0  0  0  0  0  0  0  0  0  0  0
    0.7470    1.3007    0.0000 C   0  0  0  0  0  0  0  0  0  0  0  0
   -0.0059    2.5981    0.0000 C   0  0  0  0  0  0  0  0  0  0  0  0
    0.7411    3.8988    0.0000 C   0  0  0  0  0  0  0  0  0  0  0  0
    2.2411    3.9022    0.0000 C   0  0  0  0  0  0  0  0  0  0  0  0
    2.9941    2.6049    0.0000 C   0  0  0  0  0  0  0  0  0  0  0  0
    2.2470    1.3042    0.0000 C   0  0  0  0  0  0  0  0  0  0  0  0
    3.0000    0.0068    0.0000 C   0  0  0  0  0  0  0  0  0  0  0  0
    3.7529   -1.2905    0.0000 F   0  0  0  0  0  0  0  0  0  0  0  0
    4.2973    0.7598    0.0000 F   0  0  0  0  0  0  0  0  0  0  0  0
    1.7027   -0.7461    0.0000 F   0  0  0  0  0  0  0  0  0  0  0  0
   -1.5059    2.5947    0.0000 C   0  0  0  0  0  0  0  0  0  0  0  0
   -2.2589    3.8920    0.0000 O   0  0  0  0  0  0  0  0  0  0  0  0
   -3.7589    3.8886    0.0000 C   0  0  0  0  0  0  0  0  0  0  0  0
   -4.5118    5.1859    0.0000 C   0  0  0  0  0  0  0  0  0  0  0  0
   -6.0118    5.1825    0.0000 C   0  0  0  0  0  0  0  0  0  0  0  0
   -6.7588    3.8818    0.0000 C   0  0  0  0  0  0  0  0  0  0  0  0
   -6.0059    2.5844    0.0000 C   0  0  0  0  0  0  0  0  0  0  0  0
   -4.5059    2.5878    0.0000 C   0  0  0  0  0  0  0  0  0  0  0  0
   -6.7648    6.4798    0.0000 C   0  0  0  0  0  0  0  0  0  0  0  0
   -6.0177    7.7806    0.0000 C   0  0  0  0  0  0  0  0  0  0  0  0
   -6.7707    9.0779    0.0000 C   0  0  0  0  0  0  0  0  0  0  0  0
   -8.2707    9.0745    0.0000 N   0  0  0  0  0  0  0  0  0  0  0  0
   -9.0177    7.7737    0.0000 N   0  0  0  0  0  0  0  0  0  0  0  0
   -8.2648    6.4764    0.0000 C   0  0  0  0  0  0  0  0  0  0  0  0
   -9.0118    5.1757    0.0000 C   0  0  0  0  0  0  0  0  0  0  0  0
  -10.5118    5.1723    0.0000 C   0  0  0  0  0  0  0  0  0  0  0  0
  -11.2588    3.8715    0.0000 C   0  0  0  0  0  0  0  0  0  0  0  0
  -12.7588    3.8681    0.0000 C   0  0  0  0  0  0  0  0  0  0  0  0
  -13.5118    5.1654    0.0000 C   0  0  0  0  0  0  0  0  0  0  0  0
  -12.7647    6.4662    0.0000 C   0  0  0  0  0  0  0  0  0  0  0  0
  -11.2647    6.4696    0.0000 C   0  0  0  0  0  0  0  0  0  0  0  0
   -6.0236   10.3786    0.0000 C   0  0  0  0  0  0  0  0  0  0  0  0
   -6.7766   11.6760    0.0000 Cl  0  0  0  0  0  0  0  0  0  0  0  0
   -4.5236   10.3820    0.0000 C   0  0  0  0  0  0  0  0  0  0  0  0
   -3.7707    9.0847    0.0000 C   0  0  0  0  0  0  0  0  0  0  0  0
   -4.5177    7.7840    0.0000 C   0  0  0  0  0  0  0  0  0  0  0  0
  1  2  1  0  0  0  0
  2  3  1  0  0  0  0
  2  7  2  3  0  0  0
  3  4  2  3  0  0  0
  3 12  1  0  0  0  0
  4  5  1  0  0  0  0
  5  6  2  3  0  0  0
  6  7  1  0  0  0  0
  7  8  1  0  0  0  0
  8  9  1  0  0  0  0
  8 10  1  0  0  0  0
  8 11  1  0  0  0  0
 12 13  1  0  0  0  0
 13 14  1  0  0  0  0
 14 15  1  0  0  0  0
 14 19  2  3  0  0  0
 15 16  2  3  0  0  0
 16 17  1  0  0  0  0
 16 20  1  0  0  0  0
 17 18  2  3  0  0  0
 18 19  1  0  0  0  0
 20 21  1  0  0  0  0
 20 25  2  3  0  0  0
 21 22  1  0  0  0  0
 21 37  2  3  0  0  0
 22 23  1  0  0  0  0
 22 33  2  3  0  0  0
 23 24  2  3  0  0  0
 24 25  1  0  0  0  0
 25 26  1  0  0  0  0
 26 27  1  0  0  0  0
 27 28  1  0  0  0  0
 27 32  2  3  0  0  0
 28 29  2  3  0  0  0
 29 30  1  0  0  0  0
 30 31  2  3  0  0  0
 31 32  1  0  0  0  0
 33 34  1  0  0  0  0
 33 35  1  0  0  0  0
 35 36  2  3  0  0  0
 36 37  1  0  0  0  0
M  END
>  <VC-4>
0.013498731

>  <VC-6>
0.0038967479

>  <SPC-4>
6.2222052

>  <SwHBa>
36.393871

>  <SHCsats>
0

>  <SHother>
7.8233438

>  <SssCH2>
0.71113932

>  <ETA_Shape_Y>
0.30693999

>  <ETA_dBetaP>
-0.0473

>  <nAtomP>
17

>  <MDEC-24>
2.0824275

>  <MDEC-33>
13.804522

>  <MDEC-34>
1.8128306

>  <MLFER_A>
0.003

>  <Classification>
1

$$$$
Clc1c2nnc(Cc3ccccc3)c(c2ccc1)-c1cc(OCc2c(cccc2F)C(F)(F)F)ccc1
  MOE2013           2D

 37 41  0  0  0  0  0  0  0  0999 V2000
   -0.0000   -0.0000    0.0000 Cl  0  0  0  0  0  0  0  0  0  0  0  0
   -0.7536   -1.2969    0.0000 C   0  0  0  0  0  0  0  0  0  0  0  0
   -0.0073   -2.5981    0.0000 C   0  0  0  0  0  0  0  0  0  0  0  0
    1.4927   -2.6023    0.0000 N   0  0  0  0  0  0  0  0  0  0  0  0
    2.2391   -3.9034    0.0000 N   0  0  0  0  0  0  0  0  0  0  0  0
    1.4855   -5.2003    0.0000 C   0  0  0  0  0  0  0  0  0  0  0  0
    2.2319   -6.5014    0.0000 C   0  0  0  0  0  0  0  0  0  0  0  0
    3.7318   -6.5056    0.0000 C   0  0  0  0  0  0  0  0  0  0  0  0
    4.4855   -5.2087    0.0000 C   0  0  0  0  0  0  0  0  0  0  0  0
    5.9855   -5.2129    0.0000 C   0  0  0  0  0  0  0  0  0  0  0  0
    6.7318   -6.5140    0.0000 C   0  0  0  0  0  0  0  0  0  0  0  0
    5.9782   -7.8110    0.0000 C   0  0  0  0  0  0  0  0  0  0  0  0
    4.4782   -7.8068    0.0000 C   0  0  0  0  0  0  0  0  0  0  0  0
   -0.0145   -5.1961    0.0000 C   0  0  0  0  0  0  0  0  0  0  0  0
   -0.7609   -3.8950    0.0000 C   0  0  0  0  0  0  0  0  0  0  0  0
   -2.2609   -3.8908    0.0000 C   0  0  0  0  0  0  0  0  0  0  0  0
   -3.0072   -2.5897    0.0000 C   0  0  0  0  0  0  0  0  0  0  0  0
   -2.2536   -1.2927    0.0000 C   0  0  0  0  0  0  0  0  0  0  0  0
   -0.7681   -6.4931    0.0000 C   0  0  0  0  0  0  0  0  0  0  0  0
   -2.2681   -6.4889    0.0000 C   0  0  0  0  0  0  0  0  0  0  0  0
   -3.0218   -7.7858    0.0000 C   0  0  0  0  0  0  0  0  0  0  0  0
   -4.5218   -7.7816    0.0000 O   0  0  0  0  0  0  0  0  0  0  0  0
   -5.2754   -9.0786    0.0000 C   0  0  0  0  0  0  0  0  0  0  0  0
   -6.7754   -9.0744    0.0000 C   0  0  0  0  0  0  0  0  0  0  0  0
   -7.5290  -10.3713    0.0000 C   0  0  0  0  0  0  0  0  0  0  0  0
   -9.0290  -10.3671    0.0000 C   0  0  0  0  0  0  0  0  0  0  0  0
   -9.7754   -9.0660    0.0000 C   0  0  0  0  0  0  0  0  0  0  0  0
   -9.0217   -7.7691    0.0000 C   0  0  0  0  0  0  0  0  0  0  0  0
   -7.5217   -7.7733    0.0000 C   0  0  0  0  0  0  0  0  0  0  0  0
   -6.7681   -6.4763    0.0000 F   0  0  0  0  0  0  0  0  0  0  0  0
   -6.7826  -11.6724    0.0000 C   0  0  0  0  0  0  0  0  0  0  0  0
   -5.4815  -10.9261    0.0000 F   0  0  0  0  0  0  0  0  0  0  0  0
   -6.0363  -12.9736    0.0000 F   0  0  0  0  0  0  0  0  0  0  0  0
   -8.0838  -12.4188    0.0000 F   0  0  0  0  0  0  0  0  0  0  0  0
   -2.2754   -9.0869    0.0000 C   0  0  0  0  0  0  0  0  0  0  0  0
   -0.7754   -9.0911    0.0000 C   0  0  0  0  0  0  0  0  0  0  0  0
   -0.0218   -7.7942    0.0000 C   0  0  0  0  0  0  0  0  0  0  0  0
  1  2  1  0  0  0  0
  2  3  1  0  0  0  0
  2 18  2  3  0  0  0
  3  4  1  0  0  0  0
  3 15  2  3  0  0  0
  4  5  2  3  0  0  0
  5  6  1  0  0  0  0
  6  7  1  0  0  0  0
  6 14  2  3  0  0  0
  7  8  1  0  0  0  0
  8  9  1  0  0  0  0
  8 13  2  3  0  0  0
  9 10  2  3  0  0  0
 10 11  1  0  0  0  0
 11 12  2  3  0  0  0
 12 13  1  0  0  0  0
 14 15  1  0  0  0  0
 14 19  1  0  0  0  0
 15 16  1  0  0  0  0
 16 17  2  3  0  0  0
 17 18  1  0  0  0  0
 19 20  1  0  0  0  0
 19 37  2  3  0  0  0
 20 21  2  3  0  0  0
 21 22  1  0  0  0  0
 21 35  1  0  0  0  0
 22 23  1  0  0  0  0
 23 24  1  0  0  0  0
 24 25  1  0  0  0  0
 24 29  2  3  0  0  0
 25 26  2  3  0  0  0
 25 31  1  0  0  0  0
 26 27  1  0  0  0  0
 27 28  2  3  0  0  0
 28 29  1  0  0  0  0
 29 30  1  0  0  0  0
 31 32  1  0  0  0  0
 31 33  1  0  0  0  0
 31 34  1  0  0  0  0
 35 36  2  3  0  0  0
 36 37  1  0  0  0  0
M  END
>  <VC-4>
0.013498731

>  <VC-6>
0.0038967479

>  <SPC-4>
6.1468353

>  <SwHBa>
30.186119

>  <SHCsats>
0

>  <SHother>
8.362072

>  <SssCH2>
0.004621706

>  <ETA_Shape_Y>
0.31446001

>  <ETA_dBetaP>
-0.0473

>  <nAtomP>
17

>  <MDEC-24>
2.2855546

>  <MDEC-33>
14.068643

>  <MDEC-34>
1.9698397

>  <MLFER_A>
0.003

>  <Classification>
1

$$$$
Oc1cc2c(CC[C@H]3[C@](CCC[C@]23C)(C(=O)NCCc2ccccc2)C)cc1
  MOE2013           2D

 28 31  0  0  1  0  0  0  0  0999 V2000
    0.0000    0.0000    0.0000 O   0  0  0  0  0  0  0  0  0  0  0  0
    1.2940   -0.7586    0.0000 C   0  0  0  0  0  0  0  0  0  0  0  0
    2.5980   -0.0172    0.0000 C   0  0  0  0  0  0  0  0  0  0  0  0
    3.8921   -0.7758    0.0000 C   0  0  0  0  0  0  0  0  0  0  0  0
    3.8821   -2.2758    0.0000 C   0  0  0  0  0  0  0  0  0  0  0  0
    5.1762   -3.0344    0.0000 C   0  0  0  0  0  0  0  0  0  0  0  0
    6.4801   -2.2930    0.0000 C   0  0  0  0  0  0  0  0  0  0  0  0
    6.4901   -0.7930    0.0000 C   0  0  1  0  0  0  0  0  0  0  0  0
    7.7941   -0.0517    0.0000 C   0  0  2  0  0  0  0  0  0  0  0  0
    7.8040    1.4483    0.0000 C   0  0  0  0  0  0  0  0  0  0  0  0
    6.5100    2.2069    0.0000 C   0  0  0  0  0  0  0  0  0  0  0  0
    5.2060    1.4655    0.0000 C   0  0  0  0  0  0  0  0  0  0  0  0
    5.1960   -0.0344    0.0000 C   0  0  2  0  0  0  0  0  0  0  0  0
    3.9020    0.7241    0.0000 C   0  0  0  0  0  0  0  0  0  0  0  0
    9.2940   -0.0616    0.0000 C   0  0  0  0  0  0  0  0  0  0  0  0
   10.0354   -1.3656    0.0000 O   0  0  0  0  0  0  0  0  0  0  0  0
   10.0526    1.2324    0.0000 N   0  0  0  0  0  0  0  0  0  0  0  0
   11.5526    1.2225    0.0000 C   0  0  0  0  0  0  0  0  0  0  0  0
   12.3112    2.5165    0.0000 C   0  0  0  0  0  0  0  0  0  0  0  0
   13.8111    2.5066    0.0000 C   0  0  0  0  0  0  0  0  0  0  0  0
   14.5525    1.2026    0.0000 C   0  0  0  0  0  0  0  0  0  0  0  0
   16.0525    1.1927    0.0000 C   0  0  0  0  0  0  0  0  0  0  0  0
   16.8111    2.4867    0.0000 C   0  0  0  0  0  0  0  0  0  0  0  0
   16.0697    3.7907    0.0000 C   0  0  0  0  0  0  0  0  0  0  0  0
   14.5697    3.8006    0.0000 C   0  0  0  0  0  0  0  0  0  0  0  0
    8.5354   -1.3556    0.0000 C   0  0  0  0  0  0  0  0  0  0  0  0
    2.5781   -3.0172    0.0000 C   0  0  0  0  0  0  0  0  0  0  0  0
    1.2841   -2.2586    0.0000 C   0  0  0  0  0  0  0  0  0  0  0  0
  1  2  1  0  0  0  0
  2  3  1  0  0  0  0
  2 28  2  3  0  0  0
  3  4  2  3  0  0  0
  4  5  1  0  0  0  0
  4 13  1  0  0  0  0
  5  6  1  0  0  0  0
  5 27  2  3  0  0  0
  6  7  1  0  0  0  0
  8  7  1  6  0  0  0
  8  9  1  0  0  0  0
  8 13  1  0  0  0  0
  9 10  1  0  0  0  0
  9 15  1  6  0  0  0
  9 26  1  1  0  0  0
 10 11  1  0  0  0  0
 11 12  1  0  0  0  0
 12 13  1  0  0  0  0
 13 14  1  6  0  0  0
 15 16  2  0  0  0  0
 15 17  1  0  0  0  0
 17 18  1  0  0  0  0
 18 19  1  0  0  0  0
 19 20  1  0  0  0  0
 20 21  1  0  0  0  0
 20 25  2  3  0  0  0
 21 22  2  3  0  0  0
 22 23  1  0  0  0  0
 23 24  2  3  0  0  0
 24 25  1  0  0  0  0
 27 28  1  0  0  0  0
M  END
>  <VC-4>
0.20412414

>  <VC-6>
0.1224649

>  <SPC-4>
6.2792625

>  <SwHBa>
20.499594

>  <SHCsats>
4.3708029

>  <SHother>
3.3804917

>  <SssCH2>
6.6433187

>  <ETA_Shape_Y>
0.22113

>  <ETA_dBetaP>
-0.21428999

>  <nAtomP>
7

>  <MDEC-24>
7.5399675

>  <MDEC-33>
3.8995705

>  <MDEC-34>
4.9856706

>  <MLFER_A>
0.91399997

>  <Classification>
0

$$$$
FC(F)(F)c1c2nnc(Cc3ccccc3)c(c2ccc1)-c1cc(OCc2n(c3c(c2)cccc3)C)ccc1
  MOE2013           2D

 39 44  0  0  0  0  0  0  0  0999 V2000
    0.0000   -0.0000    0.0000 F   0  0  0  0  0  0  0  0  0  0  0  0
    0.7456   -1.3016    0.0000 C   0  0  0  0  0  0  0  0  0  0  0  0
   -0.5560   -2.0472    0.0000 F   0  0  0  0  0  0  0  0  0  0  0  0
    1.4912   -2.6031    0.0000 F   0  0  0  0  0  0  0  0  0  0  0  0
    2.0472   -0.5560    0.0000 C   0  0  0  0  0  0  0  0  0  0  0  0
    2.0522    0.9440    0.0000 C   0  0  0  0  0  0  0  0  0  0  0  0
    0.7558    1.6984    0.0000 N   0  0  0  0  0  0  0  0  0  0  0  0
    0.7608    3.1984    0.0000 N   0  0  0  0  0  0  0  0  0  0  0  0
    2.0624    3.9440    0.0000 C   0  0  0  0  0  0  0  0  0  0  0  0
    2.0675    5.4440    0.0000 C   0  0  0  0  0  0  0  0  0  0  0  0
    0.7710    6.1984    0.0000 C   0  0  0  0  0  0  0  0  0  0  0  0
   -0.5306    5.4528    0.0000 C   0  0  0  0  0  0  0  0  0  0  0  0
   -1.8271    6.2072    0.0000 C   0  0  0  0  0  0  0  0  0  0  0  0
   -1.8220    7.7072    0.0000 C   0  0  0  0  0  0  0  0  0  0  0  0
   -0.5204    8.4528    0.0000 C   0  0  0  0  0  0  0  0  0  0  0  0
    0.7761    7.6984    0.0000 C   0  0  0  0  0  0  0  0  0  0  0  0
    3.3589    3.1896    0.0000 C   0  0  0  0  0  0  0  0  0  0  0  0
    3.3538    1.6896    0.0000 C   0  0  0  0  0  0  0  0  0  0  0  0
    4.6503    0.9352    0.0000 C   0  0  0  0  0  0  0  0  0  0  0  0
    4.6452   -0.5648    0.0000 C   0  0  0  0  0  0  0  0  0  0  0  0
    3.3437   -1.3104    0.0000 C   0  0  0  0  0  0  0  0  0  0  0  0
    4.6605    3.9352    0.0000 C   0  0  0  0  0  0  0  0  0  0  0  0
    5.9570    3.1808    0.0000 C   0  0  0  0  0  0  0  0  0  0  0  0
    7.2585    3.9264    0.0000 C   0  0  0  0  0  0  0  0  0  0  0  0
    8.5550    3.1720    0.0000 O   0  0  0  0  0  0  0  0  0  0  0  0
    9.8566    3.9176    0.0000 C   0  0  0  0  0  0  0  0  0  0  0  0
   11.1531    3.1632    0.0000 C   0  0  0  0  0  0  0  0  0  0  0  0
   12.5255    3.7687    0.0000 N   0  0  0  0  0  0  0  0  0  0  0  0
   13.5254    2.6506    0.0000 C   0  0  0  0  0  0  0  0  0  0  0  0
   12.7710    1.3541    0.0000 C   0  0  0  0  0  0  0  0  0  0  0  0
   11.3048    1.6709    0.0000 C   0  0  0  0  0  0  0  0  0  0  0  0
   13.5166    0.0525    0.0000 C   0  0  0  0  0  0  0  0  0  0  0  0
   15.0166    0.0474    0.0000 C   0  0  0  0  0  0  0  0  0  0  0  0
   15.7710    1.3439    0.0000 C   0  0  0  0  0  0  0  0  0  0  0  0
   15.0254    2.6455    0.0000 C   0  0  0  0  0  0  0  0  0  0  0  0
   12.8423    5.2348    0.0000 C   0  0  0  0  0  0  0  0  0  0  0  0
    7.2636    5.4264    0.0000 C   0  0  0  0  0  0  0  0  0  0  0  0
    5.9671    6.1808    0.0000 C   0  0  0  0  0  0  0  0  0  0  0  0
    4.6655    5.4352    0.0000 C   0  0  0  0  0  0  0  0  0  0  0  0
  1  2  1  0  0  0  0
  2  3  1  0  0  0  0
  2  4  1  0  0  0  0
  2  5  1  0  0  0  0
  5  6  1  0  0  0  0
  5 21  2  3  0  0  0
  6  7  1  0  0  0  0
  6 18  2  3  0  0  0
  7  8  2  3  0  0  0
  8  9  1  0  0  0  0
  9 10  1  0  0  0  0
  9 17  2  3  0  0  0
 10 11  1  0  0  0  0
 11 12  1  0  0  0  0
 11 16  2  3  0  0  0
 12 13  2  3  0  0  0
 13 14  1  0  0  0  0
 14 15  2  3  0  0  0
 15 16  1  0  0  0  0
 17 18  1  0  0  0  0
 17 22  1  0  0  0  0
 18 19  1  0  0  0  0
 19 20  2  3  0  0  0
 20 21  1  0  0  0  0
 22 23  1  0  0  0  0
 22 39  2  3  0  0  0
 23 24  2  3  0  0  0
 24 25  1  0  0  0  0
 24 37  1  0  0  0  0
 25 26  1  0  0  0  0
 26 27  1  0  0  0  0
 27 28  1  0  0  0  0
 27 31  2  3  0  0  0
 28 29  1  0  0  0  0
 28 36  1  0  0  0  0
 29 30  1  0  0  0  0
 29 35  2  3  0  0  0
 30 31  1  0  0  0  0
 30 32  2  3  0  0  0
 32 33  1  0  0  0  0
 33 34  2  3  0  0  0
 34 35  1  0  0  0  0
 37 38  2  3  0  0  0
 38 39  1  0  0  0  0
M  END
>  <VC-4>
0.013498731

>  <VC-6>
0.0038967479

>  <SPC-4>
6.5749674

>  <SwHBa>
37.679108

>  <SHCsats>
0

>  <SHother>
9.1053553

>  <SssCH2>
0.77326733

>  <ETA_Shape_Y>
0.32082

>  <ETA_dBetaP>
-0.051279999

>  <nAtomP>
17

>  <MDEC-24>
2.5128067

>  <MDEC-33>
13.375722

>  <MDEC-34>
2.2287195

>  <MLFER_A>
0.003

>  <Classification>
1

$$$$
FC(F)(F)c1noc2c1ccc(OCCCN1c3c(CC1=O)cc(cc3)C(=O)[O-])c2CCC
  MOE2013           2D

 33 36  0  0  0  0  0  0  0  0999 V2000
    0.0000    0.0000    0.0000 F   0  0  0  0  0  0  0  0  0  0  0  0
    0.7527   -1.2975    0.0000 C   0  0  0  0  0  0  0  0  0  0  0  0
    2.0502   -0.5448    0.0000 F   0  0  0  0  0  0  0  0  0  0  0  0
   -0.5448   -2.0502    0.0000 F   0  0  0  0  0  0  0  0  0  0  0  0
    1.5054   -2.5950    0.0000 C   0  0  0  0  0  0  0  0  0  0  0  0
    0.8981   -3.9665    0.0000 N   0  0  0  0  0  0  0  0  0  0  0  0
    2.0149   -4.9679    0.0000 O   0  0  0  0  0  0  0  0  0  0  0  0
    3.3124   -4.2152    0.0000 C   0  0  0  0  0  0  0  0  0  0  0  0
    2.9975   -2.7486    0.0000 C   0  0  0  0  0  0  0  0  0  0  0  0
    4.1101   -1.7426    0.0000 C   0  0  0  0  0  0  0  0  0  0  0  0
    5.5377   -2.2032    0.0000 C   0  0  0  0  0  0  0  0  0  0  0  0
    5.8526   -3.6698    0.0000 C   0  0  0  0  0  0  0  0  0  0  0  0
    7.2801   -4.1303    0.0000 O   0  0  0  0  0  0  0  0  0  0  0  0
    8.3928   -3.1243    0.0000 C   0  0  0  0  0  0  0  0  0  0  0  0
    9.8203   -3.5849    0.0000 C   0  0  0  0  0  0  0  0  0  0  0  0
   10.9329   -2.5789    0.0000 C   0  0  0  0  0  0  0  0  0  0  0  0
   12.3605   -3.0394    0.0000 N   0  0  0  0  0  0  0  0  0  0  0  0
   13.5722   -2.1552    0.0000 C   0  0  0  0  0  0  0  0  0  0  0  0
   14.7875   -3.0344    0.0000 C   0  0  0  0  0  0  0  0  0  0  0  0
   14.3270   -4.4619    0.0000 C   0  0  0  0  0  0  0  0  0  0  0  0
   12.8270   -4.4650    0.0000 C   0  0  0  0  0  0  0  0  0  0  0  0
   11.9478   -5.6804    0.0000 O   0  0  0  0  0  0  0  0  0  0  0  0
   16.1566   -2.4214    0.0000 C   0  0  0  0  0  0  0  0  0  0  0  0
   16.3103   -0.9293    0.0000 C   0  0  0  0  0  0  0  0  0  0  0  0
   15.0949   -0.0502    0.0000 C   0  0  0  0  0  0  0  0  0  0  0  0
   13.7259   -0.6631    0.0000 C   0  0  0  0  0  0  0  0  0  0  0  0
   17.6793   -0.3164    0.0000 C   0  0  0  0  0  0  0  0  0  0  0  0
   18.8947   -1.1955    0.0000 O   0  0  0  0  0  0  0  0  0  0  0  0
   17.8330    1.1757    0.0000 O   0  5  0  0  0  0  0  0  0  0  0  0
    4.7400   -4.6758    0.0000 C   0  0  0  0  0  0  0  0  0  0  0  0
    5.0549   -6.1423    0.0000 C   0  0  0  0  0  0  0  0  0  0  0  0
    3.9423   -7.1484    0.0000 C   0  0  0  0  0  0  0  0  0  0  0  0
    4.2572   -8.6149    0.0000 C   0  0  0  0  0  0  0  0  0  0  0  0
  1  2  1  0  0  0  0
  2  3  1  0  0  0  0
  2  4  1  0  0  0  0
  2  5  1  0  0  0  0
  5  6  2  3  0  0  0
  5  9  1  0  0  0  0
  6  7  1  0  0  0  0
  7  8  1  0  0  0  0
  8  9  1  0  0  0  0
  8 30  2  3  0  0  0
  9 10  2  3  0  0  0
 10 11  1  0  0  0  0
 11 12  2  3  0  0  0
 12 13  1  0  0  0  0
 12 30  1  0  0  0  0
 13 14  1  0  0  0  0
 14 15  1  0  0  0  0
 15 16  1  0  0  0  0
 16 17  1  0  0  0  0
 17 18  1  0  0  0  0
 17 21  1  0  0  0  0
 18 19  1  0  0  0  0
 18 26  2  3  0  0  0
 19 20  1  0  0  0  0
 19 23  2  3  0  0  0
 20 21  1  0  0  0  0
 21 22  2  0  0  0  0
 23 24  1  0  0  0  0
 24 25  2  3  0  0  0
 24 27  1  0  0  0  0
 25 26  1  0  0  0  0
 27 28  2  0  0  0  0
 27 29  1  0  0  0  0
 30 31  1  0  0  0  0
 31 32  1  0  0  0  0
 32 33  1  0  0  0  0
M  CHG  1  29  -1
M  END
>  <VC-4>
0.013498731

>  <VC-6>
0.0030184081

>  <SPC-4>
6.3259392

>  <SwHBa>
6.8975787

>  <SHCsats>
3.7630959

>  <SHother>
3.1385078

>  <SssCH2>
2.2701945

>  <ETA_Shape_Y>
0.36427999

>  <ETA_dBetaP>
-0.24242

>  <nAtomP>
12

>  <MDEC-24>
1.4607507

>  <MDEC-33>
9.4528656

>  <MDEC-34>
1.7525212

>  <MLFER_A>
0.24600001

>  <Classification>
0

$$$$
FC(F)(F)C(O)(C(F)(F)F)c1ccc(N([C@@H](C(=O)N(C)C)c2ccccc2)CC)cc1
  MOE2013           2D

 31 32  0  0  1  0  0  0  0  0999 V2000
    0.0000    0.0000    0.0000 F   0  0  0  0  0  0  0  0  0  0  0  0
    0.7583   -1.2942    0.0000 C   0  0  0  0  0  0  0  0  0  0  0  0
   -0.5359   -2.0525    0.0000 F   0  0  0  0  0  0  0  0  0  0  0  0
    2.0525   -0.5359    0.0000 F   0  0  0  0  0  0  0  0  0  0  0  0
    1.5166   -2.5884    0.0000 C   0  0  0  0  0  0  0  0  0  0  0  0
    0.2224   -3.3467    0.0000 O   0  0  0  0  0  0  0  0  0  0  0  0
    2.2749   -3.8826    0.0000 C   0  0  0  0  0  0  0  0  0  0  0  0
    3.0332   -5.1768    0.0000 F   0  0  0  0  0  0  0  0  0  0  0  0
    3.5691   -3.1243    0.0000 F   0  0  0  0  0  0  0  0  0  0  0  0
    0.9807   -4.6409    0.0000 F   0  0  0  0  0  0  0  0  0  0  0  0
    2.8108   -1.8301    0.0000 C   0  0  0  0  0  0  0  0  0  0  0  0
    2.8012   -0.3301    0.0000 C   0  0  0  0  0  0  0  0  0  0  0  0
    4.0954    0.4282    0.0000 C   0  0  0  0  0  0  0  0  0  0  0  0
    5.3992   -0.3135    0.0000 C   0  0  0  0  0  0  0  0  0  0  0  0
    6.6934    0.4448    0.0000 N   0  0  3  0  0  0  0  0  0  0  0  0
    7.9973   -0.2969    0.0000 C   0  0  1  0  0  0  0  0  0  0  0  0
    8.0069   -1.7968    0.0000 C   0  0  0  0  0  0  0  0  0  0  0  0
    6.7127   -2.5551    0.0000 O   0  0  0  0  0  0  0  0  0  0  0  0
    9.3107   -2.5385    0.0000 N   0  0  0  0  0  0  0  0  0  0  0  0
   10.6049   -1.7802    0.0000 C   0  0  0  0  0  0  0  0  0  0  0  0
    9.3203   -4.0385    0.0000 C   0  0  0  0  0  0  0  0  0  0  0  0
    9.2915    0.4614    0.0000 C   0  0  0  0  0  0  0  0  0  0  0  0
   10.5953   -0.2802    0.0000 C   0  0  0  0  0  0  0  0  0  0  0  0
   11.8895    0.4781    0.0000 C   0  0  0  0  0  0  0  0  0  0  0  0
   11.8799    1.9780    0.0000 C   0  0  0  0  0  0  0  0  0  0  0  0
   10.5761    2.7197    0.0000 C   0  0  0  0  0  0  0  0  0  0  0  0
    9.2819    1.9614    0.0000 C   0  0  0  0  0  0  0  0  0  0  0  0
    6.6838    1.9448    0.0000 C   0  0  0  0  0  0  0  0  0  0  0  0
    5.3800    2.6864    0.0000 C   0  0  0  0  0  0  0  0  0  0  0  0
    5.4088   -1.8135    0.0000 C   0  0  0  0  0  0  0  0  0  0  0  0
    4.1146   -2.5718    0.0000 C   0  0  0  0  0  0  0  0  0  0  0  0
  1  2  1  0  0  0  0
  2  3  1  0  0  0  0
  2  4  1  0  0  0  0
  2  5  1  0  0  0  0
  5  6  1  0  0  0  0
  5  7  1  0  0  0  0
  5 11  1  0  0  0  0
  7  8  1  0  0  0  0
  7  9  1  0  0  0  0
  7 10  1  0  0  0  0
 11 12  1  0  0  0  0
 11 31  2  3  0  0  0
 12 13  2  3  0  0  0
 13 14  1  0  0  0  0
 14 15  1  0  0  0  0
 14 30  2  3  0  0  0
 15 28  1  0  0  0  0
 16 15  1  6  0  0  0
 16 17  1  0  0  0  0
 16 22  1  0  0  0  0
 17 18  2  0  0  0  0
 17 19  1  0  0  0  0
 19 20  1  0  0  0  0
 19 21  1  0  0  0  0
 22 23  1  0  0  0  0
 22 27  2  3  0  0  0
 23 24  2  3  0  0  0
 24 25  1  0  0  0  0
 25 26  2  3  0  0  0
 26 27  1  0  0  0  0
 28 29  1  0  0  0  0
 30 31  1  0  0  0  0
M  END
>  <VC-4>
0.054948311

>  <VC-6>
0.05209782

>  <SPC-4>
9.1397905

>  <SwHBa>
10.940359

>  <SHCsats>
1.1870768

>  <SHother>
5.3694563

>  <SssCH2>
0.23739795

>  <ETA_Shape_Y>
0.24121

>  <ETA_dBetaP>
-0.29032001

>  <nAtomP>
7

>  <MDEC-24>
5.1514335

>  <MDEC-33>
3.7250352

>  <MDEC-34>
3.0518303

>  <MLFER_A>
0.85399997

>  <Classification>
0

$$$$
FC(F)(F)c1c2ncc(Cc3ccccc3)c(c2ccc1)-c1cc(Oc2ccc(OC)cc2)ccc1
  MOE2013           2D

 36 40  0  0  0  0  0  0  0  0999 V2000
   -0.0000    0.0000    0.0000 F   0  0  0  0  0  0  0  0  0  0  0  0
    0.0142    1.4999    0.0000 C   0  0  0  0  0  0  0  0  0  0  0  0
    0.0284    2.9999    0.0000 F   0  0  0  0  0  0  0  0  0  0  0  0
   -1.4857    1.5142    0.0000 F   0  0  0  0  0  0  0  0  0  0  0  0
    1.5142    1.4857    0.0000 C   0  0  0  0  0  0  0  0  0  0  0  0
    2.2764    2.7776    0.0000 C   0  0  0  0  0  0  0  0  0  0  0  0
    1.5388    4.0837    0.0000 N   0  0  0  0  0  0  0  0  0  0  0  0
    2.3011    5.3755    0.0000 C   0  0  0  0  0  0  0  0  0  0  0  0
    3.8010    5.3613    0.0000 C   0  0  0  0  0  0  0  0  0  0  0  0
    4.5633    6.6532    0.0000 C   0  0  0  0  0  0  0  0  0  0  0  0
    3.8256    7.9593    0.0000 C   0  0  0  0  0  0  0  0  0  0  0  0
    4.5879    9.2512    0.0000 C   0  0  0  0  0  0  0  0  0  0  0  0
    3.8503   10.5572    0.0000 C   0  0  0  0  0  0  0  0  0  0  0  0
    2.3503   10.5715    0.0000 C   0  0  0  0  0  0  0  0  0  0  0  0
    1.5880    9.2796    0.0000 C   0  0  0  0  0  0  0  0  0  0  0  0
    2.3257    7.9735    0.0000 C   0  0  0  0  0  0  0  0  0  0  0  0
    4.5386    4.0552    0.0000 C   0  0  0  0  0  0  0  0  0  0  0  0
    3.7764    2.7634    0.0000 C   0  0  0  0  0  0  0  0  0  0  0  0
    4.5140    1.4573    0.0000 C   0  0  0  0  0  0  0  0  0  0  0  0
    3.7517    0.1654    0.0000 C   0  0  0  0  0  0  0  0  0  0  0  0
    2.2518    0.1796    0.0000 C   0  0  0  0  0  0  0  0  0  0  0  0
    6.0386    4.0410    0.0000 C   0  0  0  0  0  0  0  0  0  0  0  0
    6.7762    2.7349    0.0000 C   0  0  0  0  0  0  0  0  0  0  0  0
    8.2762    2.7207    0.0000 C   0  0  0  0  0  0  0  0  0  0  0  0
    9.0138    1.4146    0.0000 O   0  0  0  0  0  0  0  0  0  0  0  0
   10.5137    1.4004    0.0000 C   0  0  0  0  0  0  0  0  0  0  0  0
   11.2760    2.6923    0.0000 C   0  0  0  0  0  0  0  0  0  0  0  0
   12.7760    2.6780    0.0000 C   0  0  0  0  0  0  0  0  0  0  0  0
   13.5136    1.3720    0.0000 C   0  0  0  0  0  0  0  0  0  0  0  0
   15.0135    1.3577    0.0000 O   0  0  0  0  0  0  0  0  0  0  0  0
   15.7512    0.0516    0.0000 C   0  0  0  0  0  0  0  0  0  0  0  0
   12.7513    0.0801    0.0000 C   0  0  0  0  0  0  0  0  0  0  0  0
   11.2514    0.0943    0.0000 C   0  0  0  0  0  0  0  0  0  0  0  0
    9.0384    4.0126    0.0000 C   0  0  0  0  0  0  0  0  0  0  0  0
    8.3008    5.3187    0.0000 C   0  0  0  0  0  0  0  0  0  0  0  0
    6.8009    5.3329    0.0000 C   0  0  0  0  0  0  0  0  0  0  0  0
  1  2  1  0  0  0  0
  2  3  1  0  0  0  0
  2  4  1  0  0  0  0
  2  5  1  0  0  0  0
  5  6  1  0  0  0  0
  5 21  2  3  0  0  0
  6  7  1  0  0  0  0
  6 18  2  3  0  0  0
  7  8  2  3  0  0  0
  8  9  1  0  0  0  0
  9 10  1  0  0  0  0
  9 17  2  3  0  0  0
 10 11  1  0  0  0  0
 11 12  1  0  0  0  0
 11 16  2  3  0  0  0
 12 13  2  3  0  0  0
 13 14  1  0  0  0  0
 14 15  2  3  0  0  0
 15 16  1  0  0  0  0
 17 18  1  0  0  0  0
 17 22  1  0  0  0  0
 18 19  1  0  0  0  0
 19 20  2  3  0  0  0
 20 21  1  0  0  0  0
 22 23  1  0  0  0  0
 22 36  2  3  0  0  0
 23 24  2  3  0  0  0
 24 25  1  0  0  0  0
 24 34  1  0  0  0  0
 25 26  1  0  0  0  0
 26 27  1  0  0  0  0
 26 33  2  3  0  0  0
 27 28  2  3  0  0  0
 28 29  1  0  0  0  0
 29 30  1  0  0  0  0
 29 32  2  3  0  0  0
 30 31  1  0  0  0  0
 32 33  1  0  0  0  0
 34 35  2  3  0  0  0
 35 36  1  0  0  0  0
M  END
>  <VC-4>
0.013498731

>  <VC-6>
0.0038967479

>  <SPC-4>
5.5200014

>  <SwHBa>
34.932709

>  <SHCsats>
0

>  <SHother>
9.5988789

>  <SssCH2>
0.52670979

>  <ETA_Shape_Y>
0.29543999

>  <ETA_dBetaP>
-0.03472

>  <nAtomP>
24

>  <MDEC-24>
2.6889682

>  <MDEC-33>
12.166094

>  <MDEC-34>
2.2378085

>  <MLFER_A>
0.003

>  <Classification>
0

$$$$
S(=O)(=O)(C)c1cc(Oc2cc(-n3c4c(nc3C)c(ccc4)C(F)(F)F)ccc2)ccc1
  MOE2013           2D

 31 34  0  0  0  0  0  0  0  0999 V2000
   -0.0000   -0.0000    0.0000 S   0  0  0  0  0  0  0  0  0  0  0  0
    0.7575    1.2947    0.0000 O   0  0  0  0  0  0  0  0  0  0  0  0
   -0.7575   -1.2947    0.0000 O   0  0  0  0  0  0  0  0  0  0  0  0
    1.2947   -0.7575    0.0000 C   0  0  0  0  0  0  0  0  0  0  0  0
   -1.2947    0.7575    0.0000 C   0  0  0  0  0  0  0  0  0  0  0  0
   -2.5980    0.0151    0.0000 C   0  0  0  0  0  0  0  0  0  0  0  0
   -3.8927    0.7726    0.0000 C   0  0  0  0  0  0  0  0  0  0  0  0
   -5.1961    0.0301    0.0000 O   0  0  0  0  0  0  0  0  0  0  0  0
   -6.4907    0.7877    0.0000 C   0  0  0  0  0  0  0  0  0  0  0  0
   -7.7941    0.0452    0.0000 C   0  0  0  0  0  0  0  0  0  0  0  0
   -9.0888    0.8027    0.0000 C   0  0  0  0  0  0  0  0  0  0  0  0
  -10.3921    0.0603    0.0000 N   0  0  0  0  0  0  0  0  0  0  0  0
  -11.7589    0.6783    0.0000 C   0  0  0  0  0  0  0  0  0  0  0  0
  -12.7690   -0.4305    0.0000 C   0  0  0  0  0  0  0  0  0  0  0  0
  -12.0266   -1.7339    0.0000 N   0  0  0  0  0  0  0  0  0  0  0  0
  -10.5576   -1.4305    0.0000 C   0  0  0  0  0  0  0  0  0  0  0  0
   -9.4487   -2.4407    0.0000 C   0  0  0  0  0  0  0  0  0  0  0  0
  -14.2344   -0.1102    0.0000 C   0  0  0  0  0  0  0  0  0  0  0  0
  -14.6897    1.3191    0.0000 C   0  0  0  0  0  0  0  0  0  0  0  0
  -13.6795    2.4280    0.0000 C   0  0  0  0  0  0  0  0  0  0  0  0
  -12.2141    2.1076    0.0000 C   0  0  0  0  0  0  0  0  0  0  0  0
  -15.2446   -1.2190    0.0000 C   0  0  0  0  0  0  0  0  0  0  0  0
  -16.3534   -0.2089    0.0000 F   0  0  0  0  0  0  0  0  0  0  0  0
  -16.2547   -2.3279    0.0000 F   0  0  0  0  0  0  0  0  0  0  0  0
  -14.1357   -2.2292    0.0000 F   0  0  0  0  0  0  0  0  0  0  0  0
   -9.0801    2.3027    0.0000 C   0  0  0  0  0  0  0  0  0  0  0  0
   -7.7767    3.0452    0.0000 C   0  0  0  0  0  0  0  0  0  0  0  0
   -6.4820    2.2876    0.0000 C   0  0  0  0  0  0  0  0  0  0  0  0
   -3.8840    2.2726    0.0000 C   0  0  0  0  0  0  0  0  0  0  0  0
   -2.5806    3.0150    0.0000 C   0  0  0  0  0  0  0  0  0  0  0  0
   -1.2860    2.2575    0.0000 C   0  0  0  0  0  0  0  0  0  0  0  0
  1  2  2  0  0  0  0
  1  3  2  0  0  0  0
  1  4  1  0  0  0  0
  1  5  1  0  0  0  0
  5  6  1  0  0  0  0
  5 31  2  3  0  0  0
  6  7  2  3  0  0  0
  7  8  1  0  0  0  0
  7 29  1  0  0  0  0
  8  9  1  0  0  0  0
  9 10  1  0  0  0  0
  9 28  2  3  0  0  0
 10 11  2  3  0  0  0
 11 12  1  0  0  0  0
 11 26  1  0  0  0  0
 12 13  1  0  0  0  0
 12 16  1  0  0  0  0
 13 14  1  0  0  0  0
 13 21  2  3  0  0  0
 14 15  1  0  0  0  0
 14 18  2  3  0  0  0
 15 16  2  3  0  0  0
 16 17  1  0  0  0  0
 18 19  1  0  0  0  0
 18 22  1  0  0  0  0
 19 20  2  3  0  0  0
 20 21  1  0  0  0  0
 22 23  1  0  0  0  0
 22 24  1  0  0  0  0
 22 25  1  0  0  0  0
 26 27  2  3  0  0  0
 27 28  1  0  0  0  0
 29 30  2  3  0  0  0
 30 31  1  0  0  0  0
M  END
>  <VC-4>
0.064497903

>  <VC-6>
0.020896472

>  <SPC-4>
6.4539504

>  <SwHBa>
18.44582

>  <SHCsats>
0

>  <SHother>
6.6368904

>  <SssCH2>
0

>  <ETA_Shape_Y>
0.30364999

>  <ETA_dBetaP>
-0.088710003

>  <nAtomP>
25

>  <MDEC-24>
1.7414583

>  <MDEC-33>
7.7036209

>  <MDEC-34>
1.9413359

>  <MLFER_A>
0.003

>  <Classification>
1

$$$$
FC(F)(F)c1c2ncc(c(c2ccc1)-c1cc(Oc2ccc(cc2)CO)ccc1)-c1ccccc1
  MOE2013           2D

 35 39  0  0  0  0  0  0  0  0999 V2000
   -0.0000   -0.0000    0.0000 F   0  0  0  0  0  0  0  0  0  0  0  0
   -0.2223    1.4834    0.0000 C   0  0  0  0  0  0  0  0  0  0  0  0
   -1.7058    1.2611    0.0000 F   0  0  0  0  0  0  0  0  0  0  0  0
   -0.4447    2.9669    0.0000 F   0  0  0  0  0  0  0  0  0  0  0  0
    1.2611    1.7058    0.0000 C   0  0  0  0  0  0  0  0  0  0  0  0
    1.8102    3.1016    0.0000 C   0  0  0  0  0  0  0  0  0  0  0  0
    0.8760    4.2751    0.0000 N   0  0  0  0  0  0  0  0  0  0  0  0
    1.4251    5.6710    0.0000 C   0  0  0  0  0  0  0  0  0  0  0  0
    2.9086    5.8933    0.0000 C   0  0  0  0  0  0  0  0  0  0  0  0
    3.8428    4.7198    0.0000 C   0  0  0  0  0  0  0  0  0  0  0  0
    3.2937    3.3240    0.0000 C   0  0  0  0  0  0  0  0  0  0  0  0
    4.2279    2.1505    0.0000 C   0  0  0  0  0  0  0  0  0  0  0  0
    3.6788    0.7546    0.0000 C   0  0  0  0  0  0  0  0  0  0  0  0
    2.1954    0.5323    0.0000 C   0  0  0  0  0  0  0  0  0  0  0  0
    5.3263    4.9422    0.0000 C   0  0  0  0  0  0  0  0  0  0  0  0
    6.2605    3.7687    0.0000 C   0  0  0  0  0  0  0  0  0  0  0  0
    7.7440    3.9910    0.0000 C   0  0  0  0  0  0  0  0  0  0  0  0
    8.6782    2.8175    0.0000 O   0  0  0  0  0  0  0  0  0  0  0  0
   10.1617    3.0398    0.0000 C   0  0  0  0  0  0  0  0  0  0  0  0
   11.0959    1.8663    0.0000 C   0  0  0  0  0  0  0  0  0  0  0  0
   12.5794    2.0886    0.0000 C   0  0  0  0  0  0  0  0  0  0  0  0
   13.1285    3.4845    0.0000 C   0  0  0  0  0  0  0  0  0  0  0  0
   12.1943    4.6580    0.0000 C   0  0  0  0  0  0  0  0  0  0  0  0
   10.7108    4.4357    0.0000 C   0  0  0  0  0  0  0  0  0  0  0  0
   14.6120    3.7069    0.0000 C   0  0  0  0  0  0  0  0  0  0  0  0
   15.5462    2.5333    0.0000 O   0  0  0  0  0  0  0  0  0  0  0  0
    8.2931    5.3869    0.0000 C   0  0  0  0  0  0  0  0  0  0  0  0
    7.3589    6.5604    0.0000 C   0  0  0  0  0  0  0  0  0  0  0  0
    5.8754    6.3380    0.0000 C   0  0  0  0  0  0  0  0  0  0  0  0
    3.4577    7.2892    0.0000 C   0  0  0  0  0  0  0  0  0  0  0  0
    4.9412    7.5115    0.0000 C   0  0  0  0  0  0  0  0  0  0  0  0
    5.4903    8.9074    0.0000 C   0  0  0  0  0  0  0  0  0  0  0  0
    4.5561   10.0809    0.0000 C   0  0  0  0  0  0  0  0  0  0  0  0
    3.0726    9.8586    0.0000 C   0  0  0  0  0  0  0  0  0  0  0  0
    2.5235    8.4627    0.0000 C   0  0  0  0  0  0  0  0  0  0  0  0
  1  2  1  0  0  0  0
  2  3  1  0  0  0  0
  2  4  1  0  0  0  0
  2  5  1  0  0  0  0
  5  6  1  0  0  0  0
  5 14  2  3  0  0  0
  6  7  1  0  0  0  0
  6 11  2  3  0  0  0
  7  8  2  3  0  0  0
  8  9  1  0  0  0  0
  9 10  2  3  0  0  0
  9 30  1  0  0  0  0
 10 11  1  0  0  0  0
 10 15  1  0  0  0  0
 11 12  1  0  0  0  0
 12 13  2  3  0  0  0
 13 14  1  0  0  0  0
 15 16  1  0  0  0  0
 15 29  2  3  0  0  0
 16 17  2  3  0  0  0
 17 18  1  0  0  0  0
 17 27  1  0  0  0  0
 18 19  1  0  0  0  0
 19 20  1  0  0  0  0
 19 24  2  3  0  0  0
 20 21  2  3  0  0  0
 21 22  1  0  0  0  0
 22 23  2  3  0  0  0
 22 25  1  0  0  0  0
 23 24  1  0  0  0  0
 25 26  1  0  0  0  0
 27 28  2  3  0  0  0
 28 29  1  0  0  0  0
 30 31  1  0  0  0  0
 30 35  2  3  0  0  0
 31 32  2  3  0  0  0
 32 33  1  0  0  0  0
 33 34  2  3  0  0  0
 34 35  1  0  0  0  0
M  END
>  <VC-4>
0.013498731

>  <VC-6>
0.0038967479

>  <SPC-4>
5.58812

>  <SwHBa>
33.7384

>  <SHCsats>
0

>  <SHother>
9.6947937

>  <SssCH2>
-0.062441673

>  <ETA_Shape_Y>
0.30443999

>  <ETA_dBetaP>
-0.01429

>  <nAtomP>
29

>  <MDEC-24>
2.6644022

>  <MDEC-33>
12.858431

>  <MDEC-34>
2.2725716

>  <MLFER_A>
0.34799999

>  <Classification>
1

$$$$
Oc1cc2c(CC[C@H]3[C@](CCC[C@]23C)(C(=O)NCC23CC4CC(C2)CC(C3)C4)C)cc1
  MOE2013           2D

 31 36  0  0  1  0  0  0  0  0999 V2000
   -0.0000    0.0000    0.0000 O   0  0  0  0  0  0  0  0  0  0  0  0
    1.2969    0.7536    0.0000 C   0  0  0  0  0  0  0  0  0  0  0  0
    2.5981    0.0073    0.0000 C   0  0  0  0  0  0  0  0  0  0  0  0
    3.8950    0.7609    0.0000 C   0  0  0  0  0  0  0  0  0  0  0  0
    3.8908    2.2609    0.0000 C   0  0  0  0  0  0  0  0  0  0  0  0
    5.1878    3.0145    0.0000 C   0  0  0  0  0  0  0  0  0  0  0  0
    6.4889    2.2681    0.0000 C   0  0  0  0  0  0  0  0  0  0  0  0
    6.4931    0.7681    0.0000 C   0  0  1  0  0  0  0  0  0  0  0  0
    7.7942    0.0218    0.0000 C   0  0  2  0  0  0  0  0  0  0  0  0
    7.7984   -1.4782    0.0000 C   0  0  0  0  0  0  0  0  0  0  0  0
    6.5015   -2.2318    0.0000 C   0  0  0  0  0  0  0  0  0  0  0  0
    5.2003   -1.4855    0.0000 C   0  0  0  0  0  0  0  0  0  0  0  0
    5.1961    0.0145    0.0000 C   0  0  2  0  0  0  0  0  0  0  0  0
    3.8992   -0.7391    0.0000 C   0  0  0  0  0  0  0  0  0  0  0  0
    9.2942    0.0260    0.0000 C   0  0  0  0  0  0  0  0  0  0  0  0
   10.0406    1.3271    0.0000 O   0  0  0  0  0  0  0  0  0  0  0  0
   10.0478   -1.2710    0.0000 N   0  0  0  0  0  0  0  0  0  0  0  0
   11.5478   -1.2668    0.0000 C   0  0  0  0  0  0  0  0  0  0  0  0
   12.3014   -2.5637    0.0000 C   0  0  0  0  0  0  0  0  0  0  0  0
   13.7618   -3.1343    0.0000 C   0  0  0  0  0  0  0  0  0  0  0  0
   14.5011   -4.4981    0.0000 C   0  0  0  0  0  0  0  0  0  0  0  0
   13.5651   -5.6383    0.0000 C   0  0  0  0  0  0  0  0  0  0  0  0
   12.1010   -5.0156    0.0000 C   0  0  0  0  0  0  0  0  0  0  0  0
   11.3798   -3.7124    0.0000 C   0  0  0  0  0  0  0  0  0  0  0  0
   13.4569   -4.6598    0.0000 C   0  0  0  0  0  0  0  0  0  0  0  0
   14.3629   -3.6190    0.0000 C   0  0  0  0  0  0  0  0  0  0  0  0
   13.6803   -2.3438    0.0000 C   0  0  0  0  0  0  0  0  0  0  0  0
   15.9826   -4.1559    0.0000 C   0  0  0  0  0  0  0  0  0  0  0  0
    8.5406    1.3229    0.0000 C   0  0  0  0  0  0  0  0  0  0  0  0
    2.5897    3.0072    0.0000 C   0  0  0  0  0  0  0  0  0  0  0  0
    1.2927    2.2536    0.0000 C   0  0  0  0  0  0  0  0  0  0  0  0
  1  2  1  0  0  0  0
  2  3  1  0  0  0  0
  2 31  2  3  0  0  0
  3  4  2  3  0  0  0
  4  5  1  0  0  0  0
  4 13  1  0  0  0  0
  5  6  1  0  0  0  0
  5 30  2  3  0  0  0
  6  7  1  0  0  0  0
  8  7  1  1  0  0  0
  8  9  1  0  0  0  0
  8 13  1  0  0  0  0
  9 10  1  0  0  0  0
  9 15  1  1  0  0  0
  9 29  1  6  0  0  0
 10 11  1  0  0  0  0
 11 12  1  0  0  0  0
 12 13  1  0  0  0  0
 13 14  1  1  0  0  0
 15 16  2  0  0  0  0
 15 17  1  0  0  0  0
 17 18  1  0  0  0  0
 18 19  1  0  0  0  0
 19 20  1  0  0  0  0
 19 24  1  0  0  0  0
 19 27  1  0  0  0  0
 20 21  1  0  0  0  0
 21 22  1  0  0  0  0
 21 28  1  0  0  0  0
 22 23  1  0  0  0  0
 23 24  1  0  0  0  0
 23 25  1  0  0  0  0
 25 26  1  0  0  0  0
 26 27  1  0  0  0  0
 26 28  1  0  0  0  0
 30 31  1  0  0  0  0
M  END
>  <VC-4>
0.32912415

>  <VC-6>
0.1224649

>  <SPC-4>
8.1531019

>  <SwHBa>
9.2447987

>  <SHCsats>
6.0986891

>  <SHother>
1.2368838

>  <SssCH2>
14.627608

>  <ETA_Shape_Y>
0.26549

>  <ETA_dBetaP>
-0.41935

>  <nAtomP>
7

>  <MDEC-24>
11.889331

>  <MDEC-33>
5.840044

>  <MDEC-34>
6.9892344

>  <MLFER_A>
0.91399997

>  <Classification>
0

$$$$
FC(F)(F)c1noc2c1ccc(OCCCNc1ccc(cc1)CC(=O)[O-])c2CCC
  MOE2013           2D

 31 33  0  0  0  0  0  0  0  0999 V2000
   -0.0000    0.0000    0.0000 F   0  0  0  0  0  0  0  0  0  0  0  0
   -1.5000   -0.0049    0.0000 C   0  0  0  0  0  0  0  0  0  0  0  0
   -1.5049    1.4951    0.0000 F   0  0  0  0  0  0  0  0  0  0  0  0
   -3.0000   -0.0098    0.0000 F   0  0  0  0  0  0  0  0  0  0  0  0
   -1.4951   -1.5049    0.0000 C   0  0  0  0  0  0  0  0  0  0  0  0
   -2.7057   -2.3906    0.0000 N   0  0  0  0  0  0  0  0  0  0  0  0
   -2.2375   -3.8156    0.0000 O   0  0  0  0  0  0  0  0  0  0  0  0
   -0.7375   -3.8107    0.0000 C   0  0  0  0  0  0  0  0  0  0  0  0
   -0.2787   -2.3826    0.0000 C   0  0  0  0  0  0  0  0  0  0  0  0
    1.1875   -2.0659    0.0000 C   0  0  0  0  0  0  0  0  0  0  0  0
    2.1949   -3.1774    0.0000 C   0  0  0  0  0  0  0  0  0  0  0  0
    1.7360   -4.6055    0.0000 C   0  0  0  0  0  0  0  0  0  0  0  0
    2.7434   -5.7169    0.0000 O   0  0  0  0  0  0  0  0  0  0  0  0
    4.2095   -5.4002    0.0000 C   0  0  0  0  0  0  0  0  0  0  0  0
    5.2169   -6.5116    0.0000 C   0  0  0  0  0  0  0  0  0  0  0  0
    6.6831   -6.1950    0.0000 C   0  0  0  0  0  0  0  0  0  0  0  0
    7.6904   -7.3064    0.0000 N   0  0  0  0  0  0  0  0  0  0  0  0
    9.1566   -6.9897    0.0000 C   0  0  0  0  0  0  0  0  0  0  0  0
    9.6155   -5.5616    0.0000 C   0  0  0  0  0  0  0  0  0  0  0  0
   11.0817   -5.2449    0.0000 C   0  0  0  0  0  0  0  0  0  0  0  0
   12.0890   -6.3564    0.0000 C   0  0  0  0  0  0  0  0  0  0  0  0
   11.6301   -7.7845    0.0000 C   0  0  0  0  0  0  0  0  0  0  0  0
   10.1640   -8.1011    0.0000 C   0  0  0  0  0  0  0  0  0  0  0  0
   13.5552   -6.0397    0.0000 C   0  0  0  0  0  0  0  0  0  0  0  0
   14.5625   -7.1511    0.0000 C   0  0  0  0  0  0  0  0  0  0  0  0
   14.1037   -8.5792    0.0000 O   0  0  0  0  0  0  0  0  0  0  0  0
   16.0287   -6.8344    0.0000 O   0  5  0  0  0  0  0  0  0  0  0  0
    0.2698   -4.9221    0.0000 C   0  0  0  0  0  0  0  0  0  0  0  0
   -0.1890   -6.3502    0.0000 C   0  0  0  0  0  0  0  0  0  0  0  0
   -1.6552   -6.6669    0.0000 C   0  0  0  0  0  0  0  0  0  0  0  0
   -2.1141   -8.0950    0.0000 C   0  0  0  0  0  0  0  0  0  0  0  0
  1  2  1  0  0  0  0
  2  3  1  0  0  0  0
  2  4  1  0  0  0  0
  2  5  1  0  0  0  0
  5  6  2  3  0  0  0
  5  9  1  0  0  0  0
  6  7  1  0  0  0  0
  7  8  1  0  0  0  0
  8  9  1  0  0  0  0
  8 28  2  3  0  0  0
  9 10  2  3  0  0  0
 10 11  1  0  0  0  0
 11 12  2  3  0  0  0
 12 13  1  0  0  0  0
 12 28  1  0  0  0  0
 13 14  1  0  0  0  0
 14 15  1  0  0  0  0
 15 16  1  0  0  0  0
 16 17  1  0  0  0  0
 17 18  1  0  0  0  0
 18 19  1  0  0  0  0
 18 23  2  3  0  0  0
 19 20  2  3  0  0  0
 20 21  1  0  0  0  0
 21 22  2  3  0  0  0
 21 24  1  0  0  0  0
 22 23  1  0  0  0  0
 24 25  1  0  0  0  0
 25 26  2  0  0  0  0
 25 27  1  0  0  0  0
 28 29  1  0  0  0  0
 29 30  1  0  0  0  0
 30 31  1  0  0  0  0
M  CHG  1  27  -1
M  END
>  <VC-4>
0.013498731

>  <VC-6>
0.0030184081

>  <SPC-4>
4.5702152

>  <SwHBa>
10.339827

>  <SHCsats>
3.4820716

>  <SHother>
3.3970544

>  <SssCH2>
2.7037971

>  <ETA_Shape_Y>
0.28591001

>  <ETA_dBetaP>
-0.24194001

>  <nAtomP>
10

>  <MDEC-24>
1.5046141

>  <MDEC-33>
5.7913489

>  <MDEC-34>
1.6566747

>  <MLFER_A>
0.44

>  <Classification>
0

$$$$
S(=O)(=O)(CC)c1cc(Oc2cc(-n3c4c(nc3C)c(ccc4)C(F)(F)F)ccc2)ccc1
  MOE2013           2D

 32 35  0  0  0  0  0  0  0  0999 V2000
    0.0000    0.0000    0.0000 S   0  0  0  0  0  0  0  0  0  0  0  0
   -0.7388   -1.3054    0.0000 O   0  0  0  0  0  0  0  0  0  0  0  0
    0.7388    1.3054    0.0000 O   0  0  0  0  0  0  0  0  0  0  0  0
    1.3054   -0.7388    0.0000 C   0  0  0  0  0  0  0  0  0  0  0  0
    2.5980    0.0223    0.0000 C   0  0  0  0  0  0  0  0  0  0  0  0
   -1.3054    0.7388    0.0000 C   0  0  0  0  0  0  0  0  0  0  0  0
   -2.5980   -0.0223    0.0000 C   0  0  0  0  0  0  0  0  0  0  0  0
   -3.9034    0.7165    0.0000 C   0  0  0  0  0  0  0  0  0  0  0  0
   -5.1960   -0.0447    0.0000 O   0  0  0  0  0  0  0  0  0  0  0  0
   -6.5014    0.6942    0.0000 C   0  0  0  0  0  0  0  0  0  0  0  0
   -7.7939   -0.0670    0.0000 C   0  0  0  0  0  0  0  0  0  0  0  0
   -9.0994    0.6718    0.0000 C   0  0  0  0  0  0  0  0  0  0  0  0
  -10.3919   -0.0893    0.0000 N   0  0  0  0  0  0  0  0  0  0  0  0
  -11.7674    0.5090    0.0000 C   0  0  0  0  0  0  0  0  0  0  0  0
  -12.7615   -0.6143    0.0000 C   0  0  0  0  0  0  0  0  0  0  0  0
  -12.0004   -1.9068    0.0000 N   0  0  0  0  0  0  0  0  0  0  0  0
  -10.5359   -1.5824    0.0000 C   0  0  0  0  0  0  0  0  0  0  0  0
   -9.4126   -2.5765    0.0000 C   0  0  0  0  0  0  0  0  0  0  0  0
  -14.2314   -0.3151    0.0000 C   0  0  0  0  0  0  0  0  0  0  0  0
  -14.7071    1.1075    0.0000 C   0  0  0  0  0  0  0  0  0  0  0  0
  -13.7130    2.2308    0.0000 C   0  0  0  0  0  0  0  0  0  0  0  0
  -12.2432    1.9315    0.0000 C   0  0  0  0  0  0  0  0  0  0  0  0
  -15.2254   -1.4384    0.0000 C   0  0  0  0  0  0  0  0  0  0  0  0
  -16.3487   -0.4443    0.0000 F   0  0  0  0  0  0  0  0  0  0  0  0
  -16.2195   -2.5617    0.0000 F   0  0  0  0  0  0  0  0  0  0  0  0
  -14.1021   -2.4324    0.0000 F   0  0  0  0  0  0  0  0  0  0  0  0
   -9.1123    2.1718    0.0000 C   0  0  0  0  0  0  0  0  0  0  0  0
   -7.8197    2.9329    0.0000 C   0  0  0  0  0  0  0  0  0  0  0  0
   -6.5143    2.1941    0.0000 C   0  0  0  0  0  0  0  0  0  0  0  0
   -3.9163    2.2164    0.0000 C   0  0  0  0  0  0  0  0  0  0  0  0
   -2.6238    2.9776    0.0000 C   0  0  0  0  0  0  0  0  0  0  0  0
   -1.3183    2.2388    0.0000 C   0  0  0  0  0  0  0  0  0  0  0  0
  1  2  2  0  0  0  0
  1  3  2  0  0  0  0
  1  4  1  0  0  0  0
  1  6  1  0  0  0  0
  4  5  1  0  0  0  0
  6  7  1  0  0  0  0
  6 32  2  3  0  0  0
  7  8  2  3  0  0  0
  8  9  1  0  0  0  0
  8 30  1  0  0  0  0
  9 10  1  0  0  0  0
 10 11  1  0  0  0  0
 10 29  2  3  0  0  0
 11 12  2  3  0  0  0
 12 13  1  0  0  0  0
 12 27  1  0  0  0  0
 13 14  1  0  0  0  0
 13 17  1  0  0  0  0
 14 15  1  0  0  0  0
 14 22  2  3  0  0  0
 15 16  1  0  0  0  0
 15 19  2  3  0  0  0
 16 17  2  3  0  0  0
 17 18  1  0  0  0  0
 19 20  1  0  0  0  0
 19 23  1  0  0  0  0
 20 21  2  3  0  0  0
 21 22  1  0  0  0  0
 23 24  1  0  0  0  0
 23 25  1  0  0  0  0
 23 26  1  0  0  0  0
 27 28  2  3  0  0  0
 28 29  1  0  0  0  0
 30 31  2  3  0  0  0
 31 32  1  0  0  0  0
M  END
>  <VC-4>
0.049560592

>  <VC-6>
0.015917368

>  <SPC-4>
6.9343305

>  <SwHBa>
18.637678

>  <SHCsats>
1.0060776

>  <SHother>
6.590239

>  <SssCH2>
0.11921253

>  <ETA_Shape_Y>
0.29352

>  <ETA_dBetaP>
-0.10156

>  <nAtomP>
25

>  <MDEC-24>
1.7888737

>  <MDEC-33>
7.7036209

>  <MDEC-34>
1.9413359

>  <MLFER_A>
0.003

>  <Classification>
1

$$$$
FC(F)(F)C(O)(C(F)(F)F)c1ccc(N(C(CC)(C(OC)=O)c2ccccc2)CC)cc1
  MOE2013           2D

 32 33  0  0  1  0  0  0  0  0999 V2000
    0.0000   -0.0000    0.0000 F   0  0  0  0  0  0  0  0  0  0  0  0
   -0.7543   -1.2965    0.0000 C   0  0  0  0  0  0  0  0  0  0  0  0
    0.5422   -2.0509    0.0000 F   0  0  0  0  0  0  0  0  0  0  0  0
   -2.0509   -0.5422    0.0000 F   0  0  0  0  0  0  0  0  0  0  0  0
   -1.5087   -2.5931    0.0000 C   0  0  0  0  0  0  0  0  0  0  0  0
   -0.2121   -3.3474    0.0000 O   0  0  0  0  0  0  0  0  0  0  0  0
   -2.2630   -3.8896    0.0000 C   0  0  0  0  0  0  0  0  0  0  0  0
   -3.0173   -5.1861    0.0000 F   0  0  0  0  0  0  0  0  0  0  0  0
   -3.5595   -3.1353    0.0000 F   0  0  0  0  0  0  0  0  0  0  0  0
   -0.9665   -4.6439    0.0000 F   0  0  0  0  0  0  0  0  0  0  0  0
   -2.8052   -1.8387    0.0000 C   0  0  0  0  0  0  0  0  0  0  0  0
   -4.1067   -2.5844    0.0000 C   0  0  0  0  0  0  0  0  0  0  0  0
   -5.4032   -1.8301    0.0000 C   0  0  0  0  0  0  0  0  0  0  0  0
   -5.3982   -0.3301    0.0000 C   0  0  0  0  0  0  0  0  0  0  0  0
   -6.6948    0.4243    0.0000 N   0  0  3  0  0  0  0  0  0  0  0  0
   -7.9963   -0.3214    0.0000 C   0  0  3  0  0  0  0  0  0  0  0  0
   -7.2506   -1.6229    0.0000 C   0  0  0  0  0  0  0  0  0  0  0  0
   -8.0050   -2.9195    0.0000 C   0  0  0  0  0  0  0  0  0  0  0  0
   -8.7420    0.9801    0.0000 C   0  0  0  0  0  0  0  0  0  0  0  0
  -10.2420    0.9851    0.0000 O   0  0  0  0  0  0  0  0  0  0  0  0
  -10.9876    2.2867    0.0000 C   0  0  0  0  0  0  0  0  0  0  0  0
   -7.9876    2.2767    0.0000 O   0  0  0  0  0  0  0  0  0  0  0  0
   -9.2978   -1.0671    0.0000 C   0  0  0  0  0  0  0  0  0  0  0  0
   -9.3028   -2.5671    0.0000 C   0  0  0  0  0  0  0  0  0  0  0  0
  -10.6044   -3.3127    0.0000 C   0  0  0  0  0  0  0  0  0  0  0  0
  -11.9009   -2.5584    0.0000 C   0  0  0  0  0  0  0  0  0  0  0  0
  -11.8959   -1.0584    0.0000 C   0  0  0  0  0  0  0  0  0  0  0  0
  -10.5944   -0.3127    0.0000 C   0  0  0  0  0  0  0  0  0  0  0  0
   -6.6898    1.9243    0.0000 C   0  0  0  0  0  0  0  0  0  0  0  0
   -5.3882    2.6699    0.0000 C   0  0  0  0  0  0  0  0  0  0  0  0
   -4.0967    0.4156    0.0000 C   0  0  0  0  0  0  0  0  0  0  0  0
   -2.8002   -0.3387    0.0000 C   0  0  0  0  0  0  0  0  0  0  0  0
  1  2  1  0  0  0  0
  2  3  1  0  0  0  0
  2  4  1  0  0  0  0
  2  5  1  0  0  0  0
  5  6  1  0  0  0  0
  5  7  1  0  0  0  0
  5 11  1  0  0  0  0
  7  8  1  0  0  0  0
  7  9  1  0  0  0  0
  7 10  1  0  0  0  0
 11 12  1  0  0  0  0
 11 32  2  3  0  0  0
 12 13  2  3  0  0  0
 13 14  1  0  0  0  0
 14 15  1  0  0  0  0
 14 31  2  3  0  0  0
 15 16  1  0  0  0  0
 15 29  1  0  0  0  0
 16 17  1  0  0  0  0
 16 19  1  0  0  0  0
 16 23  1  0  0  0  0
 17 18  1  0  0  0  0
 19 20  1  0  0  0  0
 19 22  2  0  0  0  0
 20 21  1  0  0  0  0
 23 24  1  0  0  0  0
 23 28  2  3  0  0  0
 24 25  2  3  0  0  0
 25 26  1  0  0  0  0
 26 27  2  3  0  0  0
 27 28  1  0  0  0  0
 29 30  1  0  0  0  0
 31 32  1  0  0  0  0
M  END
>  <VC-4>
0.094476782

>  <VC-6>
0.085837476

>  <SPC-4>
9.9819622

>  <SwHBa>
10.350819

>  <SHCsats>
2.4017282

>  <SHother>
5.3864727

>  <SssCH2>
0.38324237

>  <ETA_Shape_Y>
0.17004

>  <ETA_dBetaP>
-0.28906

>  <nAtomP>
7

>  <MDEC-24>
9.0474205

>  <MDEC-33>
1.6983813

>  <MDEC-34>
4.44203

>  <MLFER_A>
0.85399997

>  <Classification>
0

$$$$
S(=O)(=O)(N(C)c1ccc(cc1)C(O)(C(F)(F)F)c1n(ccc1)Cc1ccccc1)c1ccccc1
  MOE2013           2D

 35 38  0  0  1  0  0  0  0  0999 V2000
    0.0000    0.0000    0.0000 S   0  0  0  0  0  0  0  0  0  0  0  0
   -0.7531   -1.2972    0.0000 O   0  0  0  0  0  0  0  0  0  0  0  0
    0.7531    1.2972    0.0000 O   0  0  0  0  0  0  0  0  0  0  0  0
    1.2972   -0.7531    0.0000 N   0  0  3  0  0  0  0  0  0  0  0  0
    1.2936   -2.2531    0.0000 C   0  0  0  0  0  0  0  0  0  0  0  0
    2.5981   -0.0062    0.0000 C   0  0  0  0  0  0  0  0  0  0  0  0
    3.8953   -0.7593    0.0000 C   0  0  0  0  0  0  0  0  0  0  0  0
    5.1961   -0.0124    0.0000 C   0  0  0  0  0  0  0  0  0  0  0  0
    5.1997    1.4876    0.0000 C   0  0  0  0  0  0  0  0  0  0  0  0
    3.9025    2.2407    0.0000 C   0  0  0  0  0  0  0  0  0  0  0  0
    2.6017    1.4938    0.0000 C   0  0  0  0  0  0  0  0  0  0  0  0
    6.5006    2.2344    0.0000 C   0  0  3  0  0  0  0  0  0  0  0  0
    7.8014    2.9813    0.0000 O   0  0  0  0  0  0  0  0  0  0  0  0
    5.7537    3.5353    0.0000 C   0  0  0  0  0  0  0  0  0  0  0  0
    4.4528    2.7884    0.0000 F   0  0  0  0  0  0  0  0  0  0  0  0
    7.0545    4.2822    0.0000 F   0  0  0  0  0  0  0  0  0  0  0  0
    5.0068    4.8361    0.0000 F   0  0  0  0  0  0  0  0  0  0  0  0
    7.2474    0.9336    0.0000 C   0  0  0  0  0  0  0  0  0  0  0  0
    8.7388    0.7733    0.0000 N   0  0  0  0  0  0  0  0  0  0  0  0
    9.0472   -0.6947    0.0000 C   0  0  0  0  0  0  0  0  0  0  0  0
    7.7464   -1.4416    0.0000 C   0  0  0  0  0  0  0  0  0  0  0  0
    6.6341   -0.4352    0.0000 C   0  0  0  0  0  0  0  0  0  0  0  0
    9.7452    1.8856    0.0000 C   0  0  0  0  0  0  0  0  0  0  0  0
   11.2117    1.5702    0.0000 C   0  0  0  0  0  0  0  0  0  0  0  0
   12.2180    2.6825    0.0000 C   0  0  0  0  0  0  0  0  0  0  0  0
   13.6845    2.3671    0.0000 C   0  0  0  0  0  0  0  0  0  0  0  0
   14.1446    0.9394    0.0000 C   0  0  0  0  0  0  0  0  0  0  0  0
   13.1383   -0.1729    0.0000 C   0  0  0  0  0  0  0  0  0  0  0  0
   11.6718    0.1425    0.0000 C   0  0  0  0  0  0  0  0  0  0  0  0
   -1.2972    0.7531    0.0000 C   0  0  0  0  0  0  0  0  0  0  0  0
   -2.5981    0.0062    0.0000 C   0  0  0  0  0  0  0  0  0  0  0  0
   -3.8953    0.7593    0.0000 C   0  0  0  0  0  0  0  0  0  0  0  0
   -3.8917    2.2593    0.0000 C   0  0  0  0  0  0  0  0  0  0  0  0
   -2.5909    3.0062    0.0000 C   0  0  0  0  0  0  0  0  0  0  0  0
   -1.2936    2.2531    0.0000 C   0  0  0  0  0  0  0  0  0  0  0  0
  1  2  2  0  0  0  0
  1  3  2  0  0  0  0
  1  4  1  0  0  0  0
  1 30  1  0  0  0  0
  4  5  1  0  0  0  0
  4  6  1  0  0  0  0
  6  7  1  0  0  0  0
  6 11  2  3  0  0  0
  7  8  2  3  0  0  0
  8  9  1  0  0  0  0
  9 10  2  3  0  0  0
  9 12  1  0  0  0  0
 10 11  1  0  0  0  0
 12 13  1  0  0  0  0
 12 14  1  0  0  0  0
 12 18  1  0  0  0  0
 14 15  1  0  0  0  0
 14 16  1  0  0  0  0
 14 17  1  0  0  0  0
 18 19  1  0  0  0  0
 18 22  2  3  0  0  0
 19 20  1  0  0  0  0
 19 23  1  0  0  0  0
 20 21  2  3  0  0  0
 21 22  1  0  0  0  0
 23 24  1  0  0  0  0
 24 25  1  0  0  0  0
 24 29  2  3  0  0  0
 25 26  2  3  0  0  0
 26 27  1  0  0  0  0
 27 28  2  3  0  0  0
 28 29  1  0  0  0  0
 30 31  1  0  0  0  0
 30 35  2  3  0  0  0
 31 32  2  3  0  0  0
 32 33  1  0  0  0  0
 33 34  2  3  0  0  0
 34 35  1  0  0  0  0
M  END
>  <VC-4>
0.064257108

>  <VC-6>
0.056930531

>  <SPC-4>
9.2046804

>  <SwHBa>
26.359579

>  <SHCsats>
0

>  <SHother>
9.4766474

>  <SssCH2>
0.142537

>  <ETA_Shape_Y>
0.20012

>  <ETA_dBetaP>
-0.085709997

>  <nAtomP>
16

>  <MDEC-24>
7.1171675

>  <MDEC-33>
2.1105433

>  <MDEC-34>
3.1971955

>  <MLFER_A>
0.60100001

>  <Classification>
0

$$$$
FC(F)(F)c1c2ncc(Cc3ccccc3)c(c2ccc1)-c1cc(NCc2n(c3c(c2)cccc3)C)ccc1
  MOE2013           2D

 39 44  0  0  0  0  0  0  0  0999 V2000
    0.0000   -0.0000    0.0000 F   0  0  0  0  0  0  0  0  0  0  0  0
    0.7456   -1.3016    0.0000 C   0  0  0  0  0  0  0  0  0  0  0  0
   -0.5560   -2.0472    0.0000 F   0  0  0  0  0  0  0  0  0  0  0  0
    1.4912   -2.6031    0.0000 F   0  0  0  0  0  0  0  0  0  0  0  0
    2.0472   -0.5560    0.0000 C   0  0  0  0  0  0  0  0  0  0  0  0
    2.0522    0.9440    0.0000 C   0  0  0  0  0  0  0  0  0  0  0  0
    0.7558    1.6984    0.0000 N   0  0  0  0  0  0  0  0  0  0  0  0
    0.7608    3.1984    0.0000 C   0  0  0  0  0  0  0  0  0  0  0  0
    2.0624    3.9440    0.0000 C   0  0  0  0  0  0  0  0  0  0  0  0
    2.0675    5.4440    0.0000 C   0  0  0  0  0  0  0  0  0  0  0  0
    0.7710    6.1984    0.0000 C   0  0  0  0  0  0  0  0  0  0  0  0
   -0.5306    5.4528    0.0000 C   0  0  0  0  0  0  0  0  0  0  0  0
   -1.8271    6.2072    0.0000 C   0  0  0  0  0  0  0  0  0  0  0  0
   -1.8220    7.7072    0.0000 C   0  0  0  0  0  0  0  0  0  0  0  0
   -0.5204    8.4528    0.0000 C   0  0  0  0  0  0  0  0  0  0  0  0
    0.7761    7.6984    0.0000 C   0  0  0  0  0  0  0  0  0  0  0  0
    3.3589    3.1896    0.0000 C   0  0  0  0  0  0  0  0  0  0  0  0
    3.3538    1.6896    0.0000 C   0  0  0  0  0  0  0  0  0  0  0  0
    4.6503    0.9352    0.0000 C   0  0  0  0  0  0  0  0  0  0  0  0
    4.6452   -0.5648    0.0000 C   0  0  0  0  0  0  0  0  0  0  0  0
    3.3437   -1.3104    0.0000 C   0  0  0  0  0  0  0  0  0  0  0  0
    4.6605    3.9352    0.0000 C   0  0  0  0  0  0  0  0  0  0  0  0
    5.9570    3.1808    0.0000 C   0  0  0  0  0  0  0  0  0  0  0  0
    7.2585    3.9264    0.0000 C   0  0  0  0  0  0  0  0  0  0  0  0
    8.5550    3.1720    0.0000 N   0  0  0  0  0  0  0  0  0  0  0  0
    9.8566    3.9176    0.0000 C   0  0  0  0  0  0  0  0  0  0  0  0
   11.1531    3.1632    0.0000 C   0  0  0  0  0  0  0  0  0  0  0  0
   12.5255    3.7687    0.0000 N   0  0  0  0  0  0  0  0  0  0  0  0
   13.5254    2.6506    0.0000 C   0  0  0  0  0  0  0  0  0  0  0  0
   12.7710    1.3541    0.0000 C   0  0  0  0  0  0  0  0  0  0  0  0
   11.3048    1.6709    0.0000 C   0  0  0  0  0  0  0  0  0  0  0  0
   13.5166    0.0525    0.0000 C   0  0  0  0  0  0  0  0  0  0  0  0
   15.0166    0.0474    0.0000 C   0  0  0  0  0  0  0  0  0  0  0  0
   15.7710    1.3439    0.0000 C   0  0  0  0  0  0  0  0  0  0  0  0
   15.0254    2.6455    0.0000 C   0  0  0  0  0  0  0  0  0  0  0  0
   12.8423    5.2348    0.0000 C   0  0  0  0  0  0  0  0  0  0  0  0
    7.2636    5.4264    0.0000 C   0  0  0  0  0  0  0  0  0  0  0  0
    5.9671    6.1808    0.0000 C   0  0  0  0  0  0  0  0  0  0  0  0
    4.6655    5.4352    0.0000 C   0  0  0  0  0  0  0  0  0  0  0  0
  1  2  1  0  0  0  0
  2  3  1  0  0  0  0
  2  4  1  0  0  0  0
  2  5  1  0  0  0  0
  5  6  1  0  0  0  0
  5 21  2  3  0  0  0
  6  7  1  0  0  0  0
  6 18  2  3  0  0  0
  7  8  2  3  0  0  0
  8  9  1  0  0  0  0
  9 10  1  0  0  0  0
  9 17  2  3  0  0  0
 10 11  1  0  0  0  0
 11 12  1  0  0  0  0
 11 16  2  3  0  0  0
 12 13  2  3  0  0  0
 13 14  1  0  0  0  0
 14 15  2  3  0  0  0
 15 16  1  0  0  0  0
 17 18  1  0  0  0  0
 17 22  1  0  0  0  0
 18 19  1  0  0  0  0
 19 20  2  3  0  0  0
 20 21  1  0  0  0  0
 22 23  1  0  0  0  0
 22 39  2  3  0  0  0
 23 24  2  3  0  0  0
 24 25  1  0  0  0  0
 24 37  1  0  0  0  0
 25 26  1  0  0  0  0
 26 27  1  0  0  0  0
 27 28  1  0  0  0  0
 27 31  2  3  0  0  0
 28 29  1  0  0  0  0
 28 36  1  0  0  0  0
 29 30  1  0  0  0  0
 29 35  2  3  0  0  0
 30 31  1  0  0  0  0
 30 32  2  3  0  0  0
 32 33  1  0  0  0  0
 33 34  2  3  0  0  0
 34 35  1  0  0  0  0
 37 38  2  3  0  0  0
 38 39  1  0  0  0  0
M  END
>  <VC-4>
0.013498731

>  <VC-6>
0.0038967479

>  <SPC-4>
6.5749674

>  <SwHBa>
41.714176

>  <SHCsats>
0

>  <SHother>
9.2420835

>  <SssCH2>
1.1704116

>  <ETA_Shape_Y>
0.31794

>  <ETA_dBetaP>
-0.051279999

>  <nAtomP>
17

>  <MDEC-24>
2.7306259

>  <MDEC-33>
13.375722

>  <MDEC-34>
2.2287195

>  <MLFER_A>
0.197

>  <Classification>
1

$$$$
S(=O)(=O)(CC)c1cc(Oc2cc(-n3c4c(nc3C)c(ccc4)C(F)(F)F)ccc2)cc(F)c1
  MOE2013           2D

 33 36  0  0  0  0  0  0  0  0999 V2000
    0.0000    0.0000    0.0000 S   0  0  0  0  0  0  0  0  0  0  0  0
   -0.7428   -1.3032    0.0000 O   0  0  0  0  0  0  0  0  0  0  0  0
    0.7428    1.3032    0.0000 O   0  0  0  0  0  0  0  0  0  0  0  0
    1.3032   -0.7428    0.0000 C   0  0  0  0  0  0  0  0  0  0  0  0
    2.5980    0.0144    0.0000 C   0  0  0  0  0  0  0  0  0  0  0  0
   -1.3032    0.7428    0.0000 C   0  0  0  0  0  0  0  0  0  0  0  0
   -2.5980   -0.0144    0.0000 C   0  0  0  0  0  0  0  0  0  0  0  0
   -3.9012    0.7285    0.0000 C   0  0  0  0  0  0  0  0  0  0  0  0
   -5.1961   -0.0287    0.0000 O   0  0  0  0  0  0  0  0  0  0  0  0
   -6.4992    0.7141    0.0000 C   0  0  0  0  0  0  0  0  0  0  0  0
   -7.7941   -0.0431    0.0000 C   0  0  0  0  0  0  0  0  0  0  0  0
   -9.0973    0.6997    0.0000 C   0  0  0  0  0  0  0  0  0  0  0  0
  -10.3921   -0.0574    0.0000 N   0  0  0  0  0  0  0  0  0  0  0  0
  -11.7658    0.5451    0.0000 C   0  0  0  0  0  0  0  0  0  0  0  0
  -12.7633   -0.5752    0.0000 C   0  0  0  0  0  0  0  0  0  0  0  0
  -12.0062   -1.8700    0.0000 N   0  0  0  0  0  0  0  0  0  0  0  0
  -10.5407   -1.5501    0.0000 C   0  0  0  0  0  0  0  0  0  0  0  0
   -9.4204   -2.5476    0.0000 C   0  0  0  0  0  0  0  0  0  0  0  0
  -14.2323   -0.2714    0.0000 C   0  0  0  0  0  0  0  0  0  0  0  0
  -14.7037    1.1526    0.0000 C   0  0  0  0  0  0  0  0  0  0  0  0
  -13.7061    2.2728    0.0000 C   0  0  0  0  0  0  0  0  0  0  0  0
  -12.2372    1.9691    0.0000 C   0  0  0  0  0  0  0  0  0  0  0  0
  -15.2298   -1.3916    0.0000 C   0  0  0  0  0  0  0  0  0  0  0  0
  -16.3500   -0.3941    0.0000 F   0  0  0  0  0  0  0  0  0  0  0  0
  -16.2273   -2.5119    0.0000 F   0  0  0  0  0  0  0  0  0  0  0  0
  -14.1095   -2.3892    0.0000 F   0  0  0  0  0  0  0  0  0  0  0  0
   -9.1056    2.1997    0.0000 C   0  0  0  0  0  0  0  0  0  0  0  0
   -7.8107    2.9569    0.0000 C   0  0  0  0  0  0  0  0  0  0  0  0
   -6.5075    2.2141    0.0000 C   0  0  0  0  0  0  0  0  0  0  0  0
   -3.9095    2.2284    0.0000 C   0  0  0  0  0  0  0  0  0  0  0  0
   -2.6146    2.9856    0.0000 C   0  0  0  0  0  0  0  0  0  0  0  0
   -2.6229    4.4856    0.0000 F   0  0  0  0  0  0  0  0  0  0  0  0
   -1.3115    2.2428    0.0000 C   0  0  0  0  0  0  0  0  0  0  0  0
  1  2  2  0  0  0  0
  1  3  2  0  0  0  0
  1  4  1  0  0  0  0
  1  6  1  0  0  0  0
  4  5  1  0  0  0  0
  6  7  1  0  0  0  0
  6 33  2  3  0  0  0
  7  8  2  3  0  0  0
  8  9  1  0  0  0  0
  8 30  1  0  0  0  0
  9 10  1  0  0  0  0
 10 11  1  0  0  0  0
 10 29  2  3  0  0  0
 11 12  2  3  0  0  0
 12 13  1  0  0  0  0
 12 27  1  0  0  0  0
 13 14  1  0  0  0  0
 13 17  1  0  0  0  0
 14 15  1  0  0  0  0
 14 22  2  3  0  0  0
 15 16  1  0  0  0  0
 15 19  2  3  0  0  0
 16 17  2  3  0  0  0
 17 18  1  0  0  0  0
 19 20  1  0  0  0  0
 19 23  1  0  0  0  0
 20 21  2  3  0  0  0
 21 22  1  0  0  0  0
 23 24  1  0  0  0  0
 23 25  1  0  0  0  0
 23 26  1  0  0  0  0
 27 28  2  3  0  0  0
 28 29  1  0  0  0  0
 30 31  2  3  0  0  0
 31 32  1  0  0  0  0
 31 33  1  0  0  0  0
M  END
>  <VC-4>
0.049560592

>  <VC-6>
0.015917368

>  <SPC-4>
7.2224483

>  <SwHBa>
13.207626

>  <SHCsats>
1.0783565

>  <SHother>
6.4823909

>  <SssCH2>
-0.048009694

>  <ETA_Shape_Y>
0.32076001

>  <ETA_dBetaP>
-0.12121

>  <nAtomP>
25

>  <MDEC-24>
1.715211

>  <MDEC-33>
9.1383429

>  <MDEC-34>
1.9582812

>  <MLFER_A>
0.003

>  <Classification>
1

$$$$
Clc1cc2c3CC[C@H](Cc3[nH]c2cc1)[C@](S(=O)(=O)c1ccc(F)cc1)(C(OC)=O)C
  MOE2013           2D

 30 33  0  0  1  0  0  0  0  0999 V2000
    0.0000    0.0000    0.0000 Cl  0  0  0  0  0  0  0  0  0  0  0  0
    1.1506   -0.9623    0.0000 C   0  0  0  0  0  0  0  0  0  0  0  0
    2.5593   -0.4471    0.0000 C   0  0  0  0  0  0  0  0  0  0  0  0
    3.7099   -1.4094    0.0000 C   0  0  0  0  0  0  0  0  0  0  0  0
    5.1950   -1.1983    0.0000 C   0  0  0  0  0  0  0  0  0  0  0  0
    6.0318    0.0466    0.0000 C   0  0  0  0  0  0  0  0  0  0  0  0
    7.5283   -0.0556    0.0000 C   0  0  0  0  0  0  0  0  0  0  0  0
    8.1880   -1.4027    0.0000 C   0  0  2  0  0  0  0  0  0  0  0  0
    7.3512   -2.6476    0.0000 C   0  0  0  0  0  0  0  0  0  0  0  0
    5.8547   -2.5454    0.0000 C   0  0  0  0  0  0  0  0  0  0  0  0
    4.7774   -3.5891    0.0000 N   0  0  0  0  0  0  0  0  0  0  0  0
    3.4518   -2.8870    0.0000 C   0  0  0  0  0  0  0  0  0  0  0  0
    2.0431   -3.4023    0.0000 C   0  0  0  0  0  0  0  0  0  0  0  0
    0.8925   -2.4400    0.0000 C   0  0  0  0  0  0  0  0  0  0  0  0
    9.6845   -1.5050    0.0000 C   0  0  2  0  0  0  0  0  0  0  0  0
   11.1810   -1.6072    0.0000 S   0  0  0  0  0  0  0  0  0  0  0  0
   11.0788   -3.1037    0.0000 O   0  0  0  0  0  0  0  0  0  0  0  0
   11.2833   -0.1107    0.0000 O   0  0  0  0  0  0  0  0  0  0  0  0
   12.6776   -1.7095    0.0000 C   0  0  0  0  0  0  0  0  0  0  0  0
   13.3373   -3.0566    0.0000 C   0  0  0  0  0  0  0  0  0  0  0  0
   14.8338   -3.1588    0.0000 C   0  0  0  0  0  0  0  0  0  0  0  0
   15.6706   -1.9139    0.0000 C   0  0  0  0  0  0  0  0  0  0  0  0
   17.1671   -2.0162    0.0000 F   0  0  0  0  0  0  0  0  0  0  0  0
   15.0109   -0.5668    0.0000 C   0  0  0  0  0  0  0  0  0  0  0  0
   13.5144   -0.4646    0.0000 C   0  0  0  0  0  0  0  0  0  0  0  0
    9.7868   -0.0085    0.0000 C   0  0  0  0  0  0  0  0  0  0  0  0
    8.5419    0.8283    0.0000 O   0  0  0  0  0  0  0  0  0  0  0  0
    8.6441    2.3248    0.0000 C   0  0  0  0  0  0  0  0  0  0  0  0
   11.1339    0.6513    0.0000 O   0  0  0  0  0  0  0  0  0  0  0  0
    9.5823   -3.0015    0.0000 C   0  0  0  0  0  0  0  0  0  0  0  0
  1  2  1  0  0  0  0
  2  3  1  0  0  0  0
  2 14  2  3  0  0  0
  3  4  2  3  0  0  0
  4  5  1  0  0  0  0
  4 12  1  0  0  0  0
  5  6  1  0  0  0  0
  5 10  2  3  0  0  0
  6  7  1  0  0  0  0
  8  7  1  1  0  0  0
  8  9  1  0  0  0  0
  8 15  1  0  0  0  0
  9 10  1  0  0  0  0
 10 11  1  0  0  0  0
 11 12  1  0  0  0  0
 12 13  2  3  0  0  0
 13 14  1  0  0  0  0
 15 16  1  1  0  0  0
 15 26  1  0  0  0  0
 15 30  1  6  0  0  0
 16 17  2  0  0  0  0
 16 18  2  0  0  0  0
 16 19  1  0  0  0  0
 19 20  1  0  0  0  0
 19 25  2  3  0  0  0
 20 21  2  3  0  0  0
 21 22  1  0  0  0  0
 22 23  1  0  0  0  0
 22 24  2  3  0  0  0
 24 25  1  0  0  0  0
 26 27  1  0  0  0  0
 26 29  2  0  0  0  0
 27 28  1  0  0  0  0
M  END
>  <VC-4>
0.11383274

>  <VC-6>
0.15300576

>  <SPC-4>
8.3681898

>  <SwHBa>
15.795753

>  <SHCsats>
3.0792072

>  <SHother>
3.7233527

>  <SssCH2>
1.743832

>  <ETA_Shape_Y>
0.30892

>  <ETA_dBetaP>
-0.15000001

>  <nAtomP>
9

>  <MDEC-24>
2.7296412

>  <MDEC-33>
9.0265894

>  <MDEC-34>
2.9784884

>  <MLFER_A>
0.37400001

>  <Classification>
0

$$$$
S(=O)(=O)(NC)c1cc(ccc1)-c1ccc(cc1)-c1nc2c(nc1C)c(ccc2)C(F)(F)F
  MOE2013           2D

 32 35  0  0  0  0  0  0  0  0999 V2000
    0.0000   -0.0000    0.0000 S   0  0  0  0  0  0  0  0  0  0  0  0
    0.7390   -1.3053    0.0000 O   0  0  0  0  0  0  0  0  0  0  0  0
   -0.7390    1.3053    0.0000 O   0  0  0  0  0  0  0  0  0  0  0  0
    1.3053    0.7390    0.0000 N   0  0  0  0  0  0  0  0  0  0  0  0
    2.5980   -0.0220    0.0000 C   0  0  0  0  0  0  0  0  0  0  0  0
   -1.3053   -0.7390    0.0000 C   0  0  0  0  0  0  0  0  0  0  0  0
   -2.5980    0.0220    0.0000 C   0  0  0  0  0  0  0  0  0  0  0  0
   -3.9033   -0.7169    0.0000 C   0  0  0  0  0  0  0  0  0  0  0  0
   -3.9160   -2.2169    0.0000 C   0  0  0  0  0  0  0  0  0  0  0  0
   -2.6234   -2.9779    0.0000 C   0  0  0  0  0  0  0  0  0  0  0  0
   -1.3181   -2.2389    0.0000 C   0  0  0  0  0  0  0  0  0  0  0  0
   -5.1960    0.0440    0.0000 C   0  0  0  0  0  0  0  0  0  0  0  0
   -6.5013   -0.6949    0.0000 C   0  0  0  0  0  0  0  0  0  0  0  0
   -7.7939    0.0661    0.0000 C   0  0  0  0  0  0  0  0  0  0  0  0
   -7.7812    1.5660    0.0000 C   0  0  0  0  0  0  0  0  0  0  0  0
   -6.4759    2.3050    0.0000 C   0  0  0  0  0  0  0  0  0  0  0  0
   -5.1833    1.5440    0.0000 C   0  0  0  0  0  0  0  0  0  0  0  0
   -9.0739    2.3270    0.0000 C   0  0  0  0  0  0  0  0  0  0  0  0
   -9.0612    3.8269    0.0000 N   0  0  0  0  0  0  0  0  0  0  0  0
  -10.3538    4.5879    0.0000 C   0  0  0  0  0  0  0  0  0  0  0  0
  -11.6591    3.8490    0.0000 C   0  0  0  0  0  0  0  0  0  0  0  0
  -11.6718    2.3490    0.0000 N   0  0  0  0  0  0  0  0  0  0  0  0
  -10.3792    1.5880    0.0000 C   0  0  0  0  0  0  0  0  0  0  0  0
  -10.3919    0.0881    0.0000 C   0  0  0  0  0  0  0  0  0  0  0  0
  -12.9518    4.6100    0.0000 C   0  0  0  0  0  0  0  0  0  0  0  0
  -12.9391    6.1099    0.0000 C   0  0  0  0  0  0  0  0  0  0  0  0
  -11.6337    6.8489    0.0000 C   0  0  0  0  0  0  0  0  0  0  0  0
  -10.3411    6.0879    0.0000 C   0  0  0  0  0  0  0  0  0  0  0  0
  -14.2571    3.8710    0.0000 C   0  0  0  0  0  0  0  0  0  0  0  0
  -15.5625    3.1320    0.0000 F   0  0  0  0  0  0  0  0  0  0  0  0
  -14.9961    5.1763    0.0000 F   0  0  0  0  0  0  0  0  0  0  0  0
  -13.5182    2.5656    0.0000 F   0  0  0  0  0  0  0  0  0  0  0  0
  1  2  2  0  0  0  0
  1  3  2  0  0  0  0
  1  4  1  0  0  0  0
  1  6  1  0  0  0  0
  4  5  1  0  0  0  0
  6  7  1  0  0  0  0
  6 11  2  3  0  0  0
  7  8  2  3  0  0  0
  8  9  1  0  0  0  0
  8 12  1  0  0  0  0
  9 10  2  3  0  0  0
 10 11  1  0  0  0  0
 12 13  1  0  0  0  0
 12 17  2  3  0  0  0
 13 14  2  3  0  0  0
 14 15  1  0  0  0  0
 15 16  2  3  0  0  0
 15 18  1  0  0  0  0
 16 17  1  0  0  0  0
 18 19  1  0  0  0  0
 18 23  2  3  0  0  0
 19 20  2  3  0  0  0
 20 21  1  0  0  0  0
 20 28  1  0  0  0  0
 21 22  2  3  0  0  0
 21 25  1  0  0  0  0
 22 23  1  0  0  0  0
 23 24  1  0  0  0  0
 25 26  2  3  0  0  0
 25 29  1  0  0  0  0
 26 27  1  0  0  0  0
 27 28  2  3  0  0  0
 29 30  1  0  0  0  0
 29 31  1  0  0  0  0
 29 32  1  0  0  0  0
M  END
>  <VC-4>
0.038998317

>  <VC-6>
0.01239661

>  <SPC-4>
7.2007217

>  <SwHBa>
20.381132

>  <SHCsats>
0

>  <SHother>
6.2658563

>  <SssCH2>
0

>  <ETA_Shape_Y>
0.29886001

>  <ETA_dBetaP>
-0.03906

>  <nAtomP>
26

>  <MDEC-24>
1.6193752

>  <MDEC-33>
9.7629805

>  <MDEC-34>
1.9939489

>  <MLFER_A>
0.359

>  <Classification>
1

$$$$
FC(F)(F)c1noc2c1ccc(OCCCn1c3c(nc1)cc(cc3)CC(=O)[O-])c2CCC
  MOE2013           2D

 33 36  0  0  0  0  0  0  0  0999 V2000
    0.0000    0.0000    0.0000 F   0  0  0  0  0  0  0  0  0  0  0  0
    0.7569   -1.2951    0.0000 C   0  0  0  0  0  0  0  0  0  0  0  0
    2.0519   -0.5382    0.0000 F   0  0  0  0  0  0  0  0  0  0  0  0
   -0.5382   -2.0519    0.0000 F   0  0  0  0  0  0  0  0  0  0  0  0
    1.5137   -2.5901    0.0000 C   0  0  0  0  0  0  0  0  0  0  0  0
    0.9108   -3.9636    0.0000 N   0  0  0  0  0  0  0  0  0  0  0  0
    2.0308   -4.9614    0.0000 O   0  0  0  0  0  0  0  0  0  0  0  0
    3.3259   -4.2046    0.0000 C   0  0  0  0  0  0  0  0  0  0  0  0
    3.0063   -2.7390    0.0000 C   0  0  0  0  0  0  0  0  0  0  0  0
    4.1157   -1.7295    0.0000 C   0  0  0  0  0  0  0  0  0  0  0  0
    5.5447   -2.1854    0.0000 C   0  0  0  0  0  0  0  0  0  0  0  0
    5.8643   -3.6510    0.0000 C   0  0  0  0  0  0  0  0  0  0  0  0
    7.2933   -4.1070    0.0000 O   0  0  0  0  0  0  0  0  0  0  0  0
    8.4027   -3.0974    0.0000 C   0  0  0  0  0  0  0  0  0  0  0  0
    9.8317   -3.5534    0.0000 C   0  0  0  0  0  0  0  0  0  0  0  0
   10.9411   -2.5438    0.0000 C   0  0  0  0  0  0  0  0  0  0  0  0
   12.3702   -2.9998    0.0000 N   0  0  0  0  0  0  0  0  0  0  0  0
   13.5790   -2.1117    0.0000 C   0  0  0  0  0  0  0  0  0  0  0  0
   14.7972   -2.9870    0.0000 C   0  0  0  0  0  0  0  0  0  0  0  0
   14.3412   -4.4160    0.0000 N   0  0  0  0  0  0  0  0  0  0  0  0
   12.8412   -4.4239    0.0000 C   0  0  0  0  0  0  0  0  0  0  0  0
   16.1643   -2.3697    0.0000 C   0  0  0  0  0  0  0  0  0  0  0  0
   16.3132   -0.8771    0.0000 C   0  0  0  0  0  0  0  0  0  0  0  0
   15.0950   -0.0018    0.0000 C   0  0  0  0  0  0  0  0  0  0  0  0
   13.7279   -0.6191    0.0000 C   0  0  0  0  0  0  0  0  0  0  0  0
   17.6802   -0.2597    0.0000 C   0  0  0  0  0  0  0  0  0  0  0  0
   17.8292    1.2329    0.0000 C   0  0  0  0  0  0  0  0  0  0  0  0
   16.6110    2.1081    0.0000 O   0  0  0  0  0  0  0  0  0  0  0  0
   19.1962    1.8502    0.0000 O   0  5  0  0  0  0  0  0  0  0  0  0
    4.7549   -4.6606    0.0000 C   0  0  0  0  0  0  0  0  0  0  0  0
    5.0745   -6.1261    0.0000 C   0  0  0  0  0  0  0  0  0  0  0  0
    3.9651   -7.1357    0.0000 C   0  0  0  0  0  0  0  0  0  0  0  0
    4.2847   -8.6012    0.0000 C   0  0  0  0  0  0  0  0  0  0  0  0
  1  2  1  0  0  0  0
  2  3  1  0  0  0  0
  2  4  1  0  0  0  0
  2  5  1  0  0  0  0
  5  6  2  3  0  0  0
  5  9  1  0  0  0  0
  6  7  1  0  0  0  0
  7  8  1  0  0  0  0
  8  9  1  0  0  0  0
  8 30  2  3  0  0  0
  9 10  2  3  0  0  0
 10 11  1  0  0  0  0
 11 12  2  3  0  0  0
 12 13  1  0  0  0  0
 12 30  1  0  0  0  0
 13 14  1  0  0  0  0
 14 15  1  0  0  0  0
 15 16  1  0  0  0  0
 16 17  1  0  0  0  0
 17 18  1  0  0  0  0
 17 21  1  0  0  0  0
 18 19  1  0  0  0  0
 18 25  2  3  0  0  0
 19 20  1  0  0  0  0
 19 22  2  3  0  0  0
 20 21  2  3  0  0  0
 22 23  1  0  0  0  0
 23 24  2  3  0  0  0
 23 26  1  0  0  0  0
 24 25  1  0  0  0  0
 26 27  1  0  0  0  0
 27 28  2  0  0  0  0
 27 29  1  0  0  0  0
 30 31  1  0  0  0  0
 31 32  1  0  0  0  0
 32 33  1  0  0  0  0
M  CHG  1  29  -1
M  END
>  <VC-4>
0.013498731

>  <VC-6>
0.0030184081

>  <SPC-4>
5.4697719

>  <SwHBa>
10.89991

>  <SHCsats>
3.6597419

>  <SHother>
3.6472352

>  <SssCH2>
2.5991435

>  <ETA_Shape_Y>
0.32907

>  <ETA_dBetaP>
-0.25

>  <nAtomP>
10

>  <MDEC-24>
1.5155636

>  <MDEC-33>
7.3646069

>  <MDEC-34>
1.6844742

>  <MLFER_A>
0.24600001

>  <Classification>
0

$$$$
Clc1cc(CN(CCCC)c2ccc(cc2)C(O)(C(F)(F)F)C(F)(F)F)c(O)cc1
  MOE2013           2D

 30 31  0  0  1  0  0  0  0  0999 V2000
    0.0000   -0.0000    0.0000 Cl  0  0  0  0  0  0  0  0  0  0  0  0
   -0.7509   -1.2985    0.0000 C   0  0  0  0  0  0  0  0  0  0  0  0
   -2.2509   -1.2975    0.0000 C   0  0  0  0  0  0  0  0  0  0  0  0
   -3.0018   -2.5960    0.0000 C   0  0  0  0  0  0  0  0  0  0  0  0
   -4.5018   -2.5949    0.0000 C   0  0  0  0  0  0  0  0  0  0  0  0
   -5.2509   -1.2954    0.0000 N   0  0  3  0  0  0  0  0  0  0  0  0
   -4.5000    0.0031    0.0000 C   0  0  0  0  0  0  0  0  0  0  0  0
   -5.2491    1.3027    0.0000 C   0  0  0  0  0  0  0  0  0  0  0  0
   -4.4982    2.6012    0.0000 C   0  0  0  0  0  0  0  0  0  0  0  0
   -5.2473    3.9008    0.0000 C   0  0  0  0  0  0  0  0  0  0  0  0
   -6.7509   -1.2943    0.0000 C   0  0  0  0  0  0  0  0  0  0  0  0
   -7.5000    0.0052    0.0000 C   0  0  0  0  0  0  0  0  0  0  0  0
   -9.0000    0.0063    0.0000 C   0  0  0  0  0  0  0  0  0  0  0  0
   -9.7509   -1.2923    0.0000 C   0  0  0  0  0  0  0  0  0  0  0  0
   -9.0018   -2.5918    0.0000 C   0  0  0  0  0  0  0  0  0  0  0  0
   -7.5018   -2.5929    0.0000 C   0  0  0  0  0  0  0  0  0  0  0  0
  -11.2509   -1.2912    0.0000 C   0  0  0  0  0  0  0  0  0  0  0  0
  -12.7509   -1.2902    0.0000 O   0  0  0  0  0  0  0  0  0  0  0  0
  -11.2519   -2.7912    0.0000 C   0  0  0  0  0  0  0  0  0  0  0  0
  -12.7519   -2.7902    0.0000 F   0  0  0  0  0  0  0  0  0  0  0  0
   -9.7519   -2.7923    0.0000 F   0  0  0  0  0  0  0  0  0  0  0  0
  -11.2530   -4.2912    0.0000 F   0  0  0  0  0  0  0  0  0  0  0  0
  -11.2499    0.2088    0.0000 C   0  0  0  0  0  0  0  0  0  0  0  0
   -9.7499    0.2077    0.0000 F   0  0  0  0  0  0  0  0  0  0  0  0
  -12.7499    0.2098    0.0000 F   0  0  0  0  0  0  0  0  0  0  0  0
  -11.2488    1.7088    0.0000 F   0  0  0  0  0  0  0  0  0  0  0  0
   -2.2527   -3.8955    0.0000 C   0  0  0  0  0  0  0  0  0  0  0  0
   -3.0036   -5.1941    0.0000 O   0  0  0  0  0  0  0  0  0  0  0  0
   -0.7527   -3.8966    0.0000 C   0  0  0  0  0  0  0  0  0  0  0  0
   -0.0018   -2.5981    0.0000 C   0  0  0  0  0  0  0  0  0  0  0  0
  1  2  1  0  0  0  0
  2  3  1  0  0  0  0
  2 30  2  3  0  0  0
  3  4  2  3  0  0  0
  4  5  1  0  0  0  0
  4 27  1  0  0  0  0
  5  6  1  0  0  0  0
  6  7  1  0  0  0  0
  6 11  1  0  0  0  0
  7  8  1  0  0  0  0
  8  9  1  0  0  0  0
  9 10  1  0  0  0  0
 11 12  1  0  0  0  0
 11 16  2  3  0  0  0
 12 13  2  3  0  0  0
 13 14  1  0  0  0  0
 14 15  2  3  0  0  0
 14 17  1  0  0  0  0
 15 16  1  0  0  0  0
 17 18  1  0  0  0  0
 17 19  1  0  0  0  0
 17 23  1  0  0  0  0
 19 20  1  0  0  0  0
 19 21  1  0  0  0  0
 19 22  1  0  0  0  0
 23 24  1  0  0  0  0
 23 25  1  0  0  0  0
 23 26  1  0  0  0  0
 27 28  1  0  0  0  0
 27 29  2  3  0  0  0
 29 30  1  0  0  0  0
M  END
>  <VC-4>
0.054948311

>  <VC-6>
0.05209782

>  <SPC-4>
8.4371147

>  <SwHBa>
9.5543108

>  <SHCsats>
1.8396319

>  <SHother>
4.2536492

>  <SssCH2>
2.2952867

>  <ETA_Shape_Y>
0.21489

>  <ETA_dBetaP>
-0.31667

>  <nAtomP>
7

>  <MDEC-24>
5.7182894

>  <MDEC-33>
2.779865

>  <MDEC-34>
2.7636364

>  <MLFER_A>
1.573

>  <Classification>
0

$$$$
S(=O)(=O)(C)c1cc(Oc2cc(-n3c4c(nc3Cc3ccc(F)cc3)c(ccc4)C(F)(F)F)ccc2)ccc1
  MOE2013           2D

 38 42  0  0  0  0  0  0  0  0999 V2000
    0.0000    0.0000    0.0000 S   0  0  0  0  0  0  0  0  0  0  0  0
   -0.7453   -1.3017    0.0000 O   0  0  0  0  0  0  0  0  0  0  0  0
    0.7453    1.3017    0.0000 O   0  0  0  0  0  0  0  0  0  0  0  0
    1.3017   -0.7453    0.0000 C   0  0  0  0  0  0  0  0  0  0  0  0
   -1.3017    0.7453    0.0000 C   0  0  0  0  0  0  0  0  0  0  0  0
   -2.5981   -0.0093    0.0000 C   0  0  0  0  0  0  0  0  0  0  0  0
   -3.8998    0.7361    0.0000 C   0  0  0  0  0  0  0  0  0  0  0  0
   -5.1961   -0.0186    0.0000 O   0  0  0  0  0  0  0  0  0  0  0  0
   -6.4978    0.7268    0.0000 C   0  0  0  0  0  0  0  0  0  0  0  0
   -7.7942   -0.0279    0.0000 C   0  0  0  0  0  0  0  0  0  0  0  0
   -9.0959    0.7175    0.0000 C   0  0  0  0  0  0  0  0  0  0  0  0
  -10.3922   -0.0372    0.0000 N   0  0  0  0  0  0  0  0  0  0  0  0
  -10.5437   -1.5295    0.0000 C   0  0  0  0  0  0  0  0  0  0  0  0
  -12.0098   -1.8466    0.0000 C   0  0  0  0  0  0  0  0  0  0  0  0
  -12.7644   -0.5503    0.0000 N   0  0  0  0  0  0  0  0  0  0  0  0
  -11.7647    0.5680    0.0000 C   0  0  0  0  0  0  0  0  0  0  0  0
  -12.0818    2.0341    0.0000 C   0  0  0  0  0  0  0  0  0  0  0  0
  -13.5101    2.4925    0.0000 C   0  0  0  0  0  0  0  0  0  0  0  0
  -14.6212    1.4848    0.0000 C   0  0  0  0  0  0  0  0  0  0  0  0
  -16.0494    1.9433    0.0000 C   0  0  0  0  0  0  0  0  0  0  0  0
  -16.3665    3.4094    0.0000 C   0  0  0  0  0  0  0  0  0  0  0  0
  -17.7948    3.8678    0.0000 F   0  0  0  0  0  0  0  0  0  0  0  0
  -15.2554    4.4170    0.0000 C   0  0  0  0  0  0  0  0  0  0  0  0
  -13.8272    3.9586    0.0000 C   0  0  0  0  0  0  0  0  0  0  0  0
  -12.4682   -3.2749    0.0000 C   0  0  0  0  0  0  0  0  0  0  0  0
  -11.4605   -4.3860    0.0000 C   0  0  0  0  0  0  0  0  0  0  0  0
   -9.9944   -4.0689    0.0000 C   0  0  0  0  0  0  0  0  0  0  0  0
   -9.5360   -2.6406    0.0000 C   0  0  0  0  0  0  0  0  0  0  0  0
  -13.9343   -3.5920    0.0000 C   0  0  0  0  0  0  0  0  0  0  0  0
  -15.4004   -3.9091    0.0000 F   0  0  0  0  0  0  0  0  0  0  0  0
  -13.6172   -5.0581    0.0000 F   0  0  0  0  0  0  0  0  0  0  0  0
  -14.2514   -2.1259    0.0000 F   0  0  0  0  0  0  0  0  0  0  0  0
   -9.1013    2.2174    0.0000 C   0  0  0  0  0  0  0  0  0  0  0  0
   -7.8049    2.9721    0.0000 C   0  0  0  0  0  0  0  0  0  0  0  0
   -6.5032    2.2267    0.0000 C   0  0  0  0  0  0  0  0  0  0  0  0
   -3.9051    2.2360    0.0000 C   0  0  0  0  0  0  0  0  0  0  0  0
   -2.6088    2.9907    0.0000 C   0  0  0  0  0  0  0  0  0  0  0  0
   -1.3071    2.2453    0.0000 C   0  0  0  0  0  0  0  0  0  0  0  0
  1  2  2  0  0  0  0
  1  3  2  0  0  0  0
  1  4  1  0  0  0  0
  1  5  1  0  0  0  0
  5  6  1  0  0  0  0
  5 38  2  3  0  0  0
  6  7  2  3  0  0  0
  7  8  1  0  0  0  0
  7 36  1  0  0  0  0
  8  9  1  0  0  0  0
  9 10  1  0  0  0  0
  9 35  2  3  0  0  0
 10 11  2  3  0  0  0
 11 12  1  0  0  0  0
 11 33  1  0  0  0  0
 12 13  1  0  0  0  0
 12 16  1  0  0  0  0
 13 14  1  0  0  0  0
 13 28  2  3  0  0  0
 14 15  1  0  0  0  0
 14 25  2  3  0  0  0
 15 16  2  3  0  0  0
 16 17  1  0  0  0  0
 17 18  1  0  0  0  0
 18 19  1  0  0  0  0
 18 24  2  3  0  0  0
 19 20  2  3  0  0  0
 20 21  1  0  0  0  0
 21 22  1  0  0  0  0
 21 23  2  3  0  0  0
 23 24  1  0  0  0  0
 25 26  1  0  0  0  0
 25 29  1  0  0  0  0
 26 27  2  3  0  0  0
 27 28  1  0  0  0  0
 29 30  1  0  0  0  0
 29 31  1  0  0  0  0
 29 32  1  0  0  0  0
 33 34  2  3  0  0  0
 34 35  1  0  0  0  0
 36 37  2  3  0  0  0
 37 38  1  0  0  0  0
M  END
>  <VC-4>
0.064497903

>  <VC-6>
0.020896472

>  <SPC-4>
7.2128334

>  <SwHBa>
23.617973

>  <SHCsats>
0

>  <SHother>
9.1930113

>  <SssCH2>
0.15147154

>  <ETA_Shape_Y>
0.30377999

>  <ETA_dBetaP>
-0.065789998

>  <nAtomP>
25

>  <MDEC-24>
2.4636619

>  <MDEC-33>
10.253959

>  <MDEC-34>
2.1615694

>  <MLFER_A>
0.003

>  <Classification>
0

$$$$
FC(F)(F)c1noc2c1ccc(OCCCN1c3c(CC1=O)cc(cc3)CC(=O)[O-])c2CCC
  MOE2013           2D

 34 37  0  0  0  0  0  0  0  0999 V2000
    0.0000    0.0000    0.0000 F   0  0  0  0  0  0  0  0  0  0  0  0
    0.7678   -1.2886    0.0000 C   0  0  0  0  0  0  0  0  0  0  0  0
    2.0564   -0.5208    0.0000 F   0  0  0  0  0  0  0  0  0  0  0  0
   -0.5208   -2.0564    0.0000 F   0  0  0  0  0  0  0  0  0  0  0  0
    1.5356   -2.5772    0.0000 C   0  0  0  0  0  0  0  0  0  0  0  0
    0.9443   -3.9558    0.0000 N   0  0  0  0  0  0  0  0  0  0  0  0
    2.0727   -4.9441    0.0000 O   0  0  0  0  0  0  0  0  0  0  0  0
    3.3614   -4.1763    0.0000 C   0  0  0  0  0  0  0  0  0  0  0  0
    3.0294   -2.7135    0.0000 C   0  0  0  0  0  0  0  0  0  0  0  0
    4.1302   -1.6946    0.0000 C   0  0  0  0  0  0  0  0  0  0  0  0
    5.5630   -2.1385    0.0000 C   0  0  0  0  0  0  0  0  0  0  0  0
    5.8950   -3.6013    0.0000 C   0  0  0  0  0  0  0  0  0  0  0  0
    7.3278   -4.0451    0.0000 O   0  0  0  0  0  0  0  0  0  0  0  0
    8.4286   -3.0262    0.0000 C   0  0  0  0  0  0  0  0  0  0  0  0
    9.8615   -3.4701    0.0000 C   0  0  0  0  0  0  0  0  0  0  0  0
   10.9623   -2.4512    0.0000 C   0  0  0  0  0  0  0  0  0  0  0  0
   12.3951   -2.8951    0.0000 N   0  0  0  0  0  0  0  0  0  0  0  0
   13.5964   -1.9968    0.0000 C   0  0  0  0  0  0  0  0  0  0  0  0
   14.8219   -2.8617    0.0000 C   0  0  0  0  0  0  0  0  0  0  0  0
   14.3780   -4.2945    0.0000 C   0  0  0  0  0  0  0  0  0  0  0  0
   12.8782   -4.3151    0.0000 C   0  0  0  0  0  0  0  0  0  0  0  0
   12.0133   -5.5407    0.0000 O   0  0  0  0  0  0  0  0  0  0  0  0
   16.1837   -2.2328    0.0000 C   0  0  0  0  0  0  0  0  0  0  0  0
   16.3200   -0.7390    0.0000 C   0  0  0  0  0  0  0  0  0  0  0  0
   15.0945    0.1259    0.0000 C   0  0  0  0  0  0  0  0  0  0  0  0
   13.7327   -0.5030    0.0000 C   0  0  0  0  0  0  0  0  0  0  0  0
   17.6818   -0.1102    0.0000 C   0  0  0  0  0  0  0  0  0  0  0  0
   17.8181    1.3836    0.0000 C   0  0  0  0  0  0  0  0  0  0  0  0
   16.5926    2.2486    0.0000 O   0  0  0  0  0  0  0  0  0  0  0  0
   19.1799    2.0125    0.0000 O   0  5  0  0  0  0  0  0  0  0  0  0
    4.7942   -4.6202    0.0000 C   0  0  0  0  0  0  0  0  0  0  0  0
    5.1262   -6.0830    0.0000 C   0  0  0  0  0  0  0  0  0  0  0  0
    4.0254   -7.1019    0.0000 C   0  0  0  0  0  0  0  0  0  0  0  0
    4.3573   -8.5647    0.0000 C   0  0  0  0  0  0  0  0  0  0  0  0
  1  2  1  0  0  0  0
  2  3  1  0  0  0  0
  2  4  1  0  0  0  0
  2  5  1  0  0  0  0
  5  6  2  3  0  0  0
  5  9  1  0  0  0  0
  6  7  1  0  0  0  0
  7  8  1  0  0  0  0
  8  9  1  0  0  0  0
  8 31  2  3  0  0  0
  9 10  2  3  0  0  0
 10 11  1  0  0  0  0
 11 12  2  3  0  0  0
 12 13  1  0  0  0  0
 12 31  1  0  0  0  0
 13 14  1  0  0  0  0
 14 15  1  0  0  0  0
 15 16  1  0  0  0  0
 16 17  1  0  0  0  0
 17 18  1  0  0  0  0
 17 21  1  0  0  0  0
 18 19  1  0  0  0  0
 18 26  2  3  0  0  0
 19 20  1  0  0  0  0
 19 23  2  3  0  0  0
 20 21  1  0  0  0  0
 21 22  2  0  0  0  0
 23 24  1  0  0  0  0
 24 25  2  3  0  0  0
 24 27  1  0  0  0  0
 25 26  1  0  0  0  0
 27 28  1  0  0  0  0
 28 29  2  0  0  0  0
 28 30  1  0  0  0  0
 31 32  1  0  0  0  0
 32 33  1  0  0  0  0
 33 34  1  0  0  0  0
M  CHG  1  30  -1
M  END
>  <VC-4>
0.013498731

>  <VC-6>
0.0030184081

>  <SPC-4>
5.9228673

>  <SwHBa>
8.5953121

>  <SHCsats>
3.7374852

>  <SHother>
2.946722

>  <SssCH2>
2.2365003

>  <ETA_Shape_Y>
0.35238999

>  <ETA_dBetaP>
-0.25

>  <nAtomP>
10

>  <MDEC-24>
1.5046141

>  <MDEC-33>
9.0838766

>  <MDEC-34>
1.7412472

>  <MLFER_A>
0.24600001

>  <Classification>
0

$$$$
Clc1cc(ccc1N(Cc1ccccc1)CC)C(O)(C(F)(F)F)C(F)(F)F
  MOE2013           2D

 27 28  0  0  1  0  0  0  0  0999 V2000
   -0.0000    0.0000    0.0000 Cl  0  0  0  0  0  0  0  0  0  0  0  0
   -0.7417    1.3038    0.0000 C   0  0  0  0  0  0  0  0  0  0  0  0
   -2.2417    1.3134    0.0000 C   0  0  0  0  0  0  0  0  0  0  0  0
   -2.9833    2.6172    0.0000 C   0  0  0  0  0  0  0  0  0  0  0  0
   -2.2251    3.9114    0.0000 C   0  0  0  0  0  0  0  0  0  0  0  0
   -0.7251    3.9018    0.0000 C   0  0  0  0  0  0  0  0  0  0  0  0
    0.0166    2.5980    0.0000 C   0  0  0  0  0  0  0  0  0  0  0  0
    1.5166    2.5884    0.0000 N   0  0  3  0  0  0  0  0  0  0  0  0
    2.2583    1.2846    0.0000 C   0  0  0  0  0  0  0  0  0  0  0  0
    3.7582    1.2751    0.0000 C   0  0  0  0  0  0  0  0  0  0  0  0
    4.5165    2.5693    0.0000 C   0  0  0  0  0  0  0  0  0  0  0  0
    6.0165    2.5597    0.0000 C   0  0  0  0  0  0  0  0  0  0  0  0
    6.7582    1.2559    0.0000 C   0  0  0  0  0  0  0  0  0  0  0  0
    5.9999   -0.0383    0.0000 C   0  0  0  0  0  0  0  0  0  0  0  0
    4.4999   -0.0287    0.0000 C   0  0  0  0  0  0  0  0  0  0  0  0
    2.2748    3.8827    0.0000 C   0  0  0  0  0  0  0  0  0  0  0  0
    1.5332    5.1865    0.0000 C   0  0  0  0  0  0  0  0  0  0  0  0
   -4.4833    2.6268    0.0000 C   0  0  0  0  0  0  0  0  0  0  0  0
   -5.9833    2.6364    0.0000 O   0  0  0  0  0  0  0  0  0  0  0  0
   -4.4737    4.1267    0.0000 C   0  0  0  0  0  0  0  0  0  0  0  0
   -4.4641    5.6267    0.0000 F   0  0  0  0  0  0  0  0  0  0  0  0
   -2.9738    4.1172    0.0000 F   0  0  0  0  0  0  0  0  0  0  0  0
   -5.9737    4.1363    0.0000 F   0  0  0  0  0  0  0  0  0  0  0  0
   -4.4929    1.1268    0.0000 C   0  0  0  0  0  0  0  0  0  0  0  0
   -2.9929    1.1172    0.0000 F   0  0  0  0  0  0  0  0  0  0  0  0
   -4.5025   -0.3732    0.0000 F   0  0  0  0  0  0  0  0  0  0  0  0
   -5.9929    1.1364    0.0000 F   0  0  0  0  0  0  0  0  0  0  0  0
  1  2  1  0  0  0  0
  2  3  1  0  0  0  0
  2  7  2  3  0  0  0
  3  4  2  3  0  0  0
  4  5  1  0  0  0  0
  4 18  1  0  0  0  0
  5  6  2  3  0  0  0
  6  7  1  0  0  0  0
  7  8  1  0  0  0  0
  8  9  1  0  0  0  0
  8 16  1  0  0  0  0
  9 10  1  0  0  0  0
 10 11  1  0  0  0  0
 10 15  2  3  0  0  0
 11 12  2  3  0  0  0
 12 13  1  0  0  0  0
 13 14  2  3  0  0  0
 14 15  1  0  0  0  0
 16 17  1  0  0  0  0
 18 19  1  0  0  0  0
 18 20  1  0  0  0  0
 18 24  1  0  0  0  0
 20 21  1  0  0  0  0
 20 22  1  0  0  0  0
 20 23  1  0  0  0  0
 24 25  1  0  0  0  0
 24 26  1  0  0  0  0
 24 27  1  0  0  0  0
M  END
>  <VC-4>
0.054948311

>  <VC-6>
0.05209782

>  <SPC-4>
7.9927535

>  <SwHBa>
12.756837

>  <SHCsats>
1.0411671

>  <SHother>
4.4249678

>  <SssCH2>
0.99503088

>  <ETA_Shape_Y>
0.19734

>  <ETA_dBetaP>
-0.28704

>  <nAtomP>
7

>  <MDEC-24>
4.8494358

>  <MDEC-33>
2.1822472

>  <MDEC-34>
3.1717551

>  <MLFER_A>
0.85399997

>  <Classification>
0

$$$$
O[C@@]12[C@H]([C@@H]3CC[C@H]([C@H](C)[C@H]4C[C@@]4([C@H](C(C)C)C)C)[C@]3(C[C@H]1O)C)CC=C1C[C@@H](O)CC[C@@]12C
  MOE2013           2D

 33 37  0  0  1  0  0  0  0  0999 V2000
   -0.0000   -0.0000    0.0000 O   0  0  0  0  0  0  0  0  0  0  0  0
   -1.5000    0.0119    0.0000 C   0  0  1  0  0  0  0  0  0  0  0  0
   -0.7602   -1.2931    0.0000 C   0  0  2  0  0  0  0  0  0  0  0  0
    0.7397   -1.3049    0.0000 C   0  0  2  0  0  0  0  0  0  0  0  0
    1.7346   -2.4275    0.0000 C   0  0  0  0  0  0  0  0  0  0  0  0
    3.1097   -1.8283    0.0000 C   0  0  0  0  0  0  0  0  0  0  0  0
    2.9647   -0.3353    0.0000 C   0  0  2  0  0  0  0  0  0  0  0  0
    4.0873    0.6595    0.0000 C   0  0  2  0  0  0  0  0  0  0  0  0
    3.7870    2.1292    0.0000 C   0  0  0  0  0  0  0  0  0  0  0  0
    5.5102    0.1848    0.0000 C   0  0  1  0  0  0  0  0  0  0  0  0
    6.5050   -0.9379    0.0000 C   0  0  0  0  0  0  0  0  0  0  0  0
    6.9798    0.4850    0.0000 C   0  0  2  0  0  0  0  0  0  0  0  0
    8.4761    0.5909    0.0000 C   0  0  2  0  0  0  0  0  0  0  0  0
    9.3159   -0.6520    0.0000 C   0  0  0  0  0  0  0  0  0  0  0  0
   10.8121   -0.5461    0.0000 C   0  0  0  0  0  0  0  0  0  0  0  0
    8.6594   -2.0007    0.0000 C   0  0  0  0  0  0  0  0  0  0  0  0
    9.1325    1.9396    0.0000 C   0  0  0  0  0  0  0  0  0  0  0  0
    7.2648    1.9577    0.0000 C   0  0  0  0  0  0  0  0  0  0  0  0
    1.5000   -0.0119    0.0000 C   0  0  1  0  0  0  0  0  0  0  0  0
    0.7602    1.2931    0.0000 C   0  0  0  0  0  0  0  0  0  0  0  0
   -0.7397    1.3049    0.0000 C   0  0  1  0  0  0  0  0  0  0  0  0
   -1.4794    2.6098    0.0000 O   0  0  0  0  0  0  0  0  0  0  0  0
    2.3700    1.2100    0.0000 C   0  0  0  0  0  0  0  0  0  0  0  0
   -1.5205   -2.5861    0.0000 C   0  0  0  0  0  0  0  0  0  0  0  0
   -3.0204   -2.5743    0.0000 C   0  0  0  0  0  0  0  0  0  0  0  0
   -3.7601   -1.2694    0.0000 C   0  0  0  0  0  0  0  0  0  0  0  0
   -5.2601   -1.2575    0.0000 C   0  0  0  0  0  0  0  0  0  0  0  0
   -5.9998    0.0474    0.0000 C   0  0  1  0  0  0  0  0  0  0  0  0
   -7.4998    0.0593    0.0000 O   0  0  0  0  0  0  0  0  0  0  0  0
   -5.2396    1.3405    0.0000 C   0  0  0  0  0  0  0  0  0  0  0  0
   -3.7396    1.3286    0.0000 C   0  0  0  0  0  0  0  0  0  0  0  0
   -2.9999    0.0237    0.0000 C   0  0  2  0  0  0  0  0  0  0  0  0
   -2.2397    1.3168    0.0000 C   0  0  0  0  0  0  0  0  0  0  0  0
  2  1  1  6  0  0  0
  2  3  1  0  0  0  0
  2 21  1  0  0  0  0
  2 32  1  0  0  0  0
  3  4  1  0  0  0  0
  3 24  1  6  0  0  0
  4  5  1  1  0  0  0
  4 19  1  0  0  0  0
  5  6  1  0  0  0  0
  7  6  1  1  0  0  0
  7  8  1  0  0  0  0
  7 19  1  0  0  0  0
  8  9  1  6  0  0  0
  8 10  1  0  0  0  0
 10 11  1  6  0  0  0
 10 12  1  0  0  0  0
 11 12  1  0  0  0  0
 12 13  1  0  0  0  0
 12 18  1  6  0  0  0
 13 14  1  0  0  0  0
 13 17  1  1  0  0  0
 14 15  1  0  0  0  0
 14 16  1  0  0  0  0
 19 20  1  0  0  0  0
 19 23  1  1  0  0  0
 20 21  1  0  0  0  0
 21 22  1  6  0  0  0
 24 25  1  0  0  0  0
 25 26  2  3  0  0  0
 26 27  1  0  0  0  0
 26 32  1  0  0  0  0
 27 28  1  0  0  0  0
 28 29  1  1  0  0  0
 28 30  1  0  0  0  0
 30 31  1  0  0  0  0
 31 32  1  0  0  0  0
 32 33  1  1  0  0  0
M  END
>  <VC-4>
0.3613584

>  <VC-6>
0.36061916

>  <SPC-4>
11.722598

>  <SwHBa>
3.5425222

>  <SHCsats>
7.9333081

>  <SHother>
0.20740539

>  <SssCH2>
7.5481348

>  <ETA_Shape_Y>
0.3125

>  <ETA_dBetaP>
-0.55303001

>  <nAtomP>
2

>  <MDEC-24>
10.302345

>  <MDEC-33>
10.769758

>  <MDEC-34>
12.146127

>  <MLFER_A>
0.949

>  <Classification>
0

$$$$
Clc1ccc(cc1COc1cc(ccc1)-c1c2c(nnc1Cc1ccccc1)c(Cl)ccc2)C(F)(F)F
  MOE2013           2D

 37 41  0  0  0  0  0  0  0  0999 V2000
    0.0000   -0.0000    0.0000 Cl  0  0  0  0  0  0  0  0  0  0  0  0
    0.7410   -1.3042    0.0000 C   0  0  0  0  0  0  0  0  0  0  0  0
    2.2410   -1.3146    0.0000 C   0  0  0  0  0  0  0  0  0  0  0  0
    2.9819   -2.6188    0.0000 C   0  0  0  0  0  0  0  0  0  0  0  0
    2.2230   -3.9126    0.0000 C   0  0  0  0  0  0  0  0  0  0  0  0
    0.7230   -3.9022    0.0000 C   0  0  0  0  0  0  0  0  0  0  0  0
   -0.0180   -2.5980    0.0000 C   0  0  0  0  0  0  0  0  0  0  0  0
   -1.5179   -2.5876    0.0000 C   0  0  0  0  0  0  0  0  0  0  0  0
   -2.2589   -1.2834    0.0000 O   0  0  0  0  0  0  0  0  0  0  0  0
   -3.7589   -1.2731    0.0000 C   0  0  0  0  0  0  0  0  0  0  0  0
   -4.4999    0.0311    0.0000 C   0  0  0  0  0  0  0  0  0  0  0  0
   -5.9999    0.0415    0.0000 C   0  0  0  0  0  0  0  0  0  0  0  0
   -6.7588   -1.2523    0.0000 C   0  0  0  0  0  0  0  0  0  0  0  0
   -6.0178   -2.5565    0.0000 C   0  0  0  0  0  0  0  0  0  0  0  0
   -4.5179   -2.5669    0.0000 C   0  0  0  0  0  0  0  0  0  0  0  0
   -6.7408    1.3457    0.0000 C   0  0  0  0  0  0  0  0  0  0  0  0
   -5.9819    2.6395    0.0000 C   0  0  0  0  0  0  0  0  0  0  0  0
   -6.7229    3.9437    0.0000 C   0  0  0  0  0  0  0  0  0  0  0  0
   -8.2228    3.9541    0.0000 N   0  0  0  0  0  0  0  0  0  0  0  0
   -8.9818    2.6603    0.0000 N   0  0  0  0  0  0  0  0  0  0  0  0
   -8.2408    1.3561    0.0000 C   0  0  0  0  0  0  0  0  0  0  0  0
   -8.9998    0.0623    0.0000 C   0  0  0  0  0  0  0  0  0  0  0  0
  -10.4997    0.0727    0.0000 C   0  0  0  0  0  0  0  0  0  0  0  0
  -11.2407    1.3769    0.0000 C   0  0  0  0  0  0  0  0  0  0  0  0
  -12.7407    1.3872    0.0000 C   0  0  0  0  0  0  0  0  0  0  0  0
  -13.4997    0.0934    0.0000 C   0  0  0  0  0  0  0  0  0  0  0  0
  -12.7587   -1.2108    0.0000 C   0  0  0  0  0  0  0  0  0  0  0  0
  -11.2587   -1.2212    0.0000 C   0  0  0  0  0  0  0  0  0  0  0  0
   -5.9639    5.2376    0.0000 C   0  0  0  0  0  0  0  0  0  0  0  0
   -6.7049    6.5417    0.0000 Cl  0  0  0  0  0  0  0  0  0  0  0  0
   -4.4639    5.2272    0.0000 C   0  0  0  0  0  0  0  0  0  0  0  0
   -3.7229    3.9230    0.0000 C   0  0  0  0  0  0  0  0  0  0  0  0
   -4.4819    2.6292    0.0000 C   0  0  0  0  0  0  0  0  0  0  0  0
    2.9640   -5.2168    0.0000 C   0  0  0  0  0  0  0  0  0  0  0  0
    3.7050   -6.5210    0.0000 F   0  0  0  0  0  0  0  0  0  0  0  0
    4.2682   -4.4758    0.0000 F   0  0  0  0  0  0  0  0  0  0  0  0
    1.6598   -5.9578    0.0000 F   0  0  0  0  0  0  0  0  0  0  0  0
  1  2  1  0  0  0  0
  2  3  1  0  0  0  0
  2  7  2  3  0  0  0
  3  4  2  3  0  0  0
  4  5  1  0  0  0  0
  5  6  2  3  0  0  0
  5 34  1  0  0  0  0
  6  7  1  0  0  0  0
  7  8  1  0  0  0  0
  8  9  1  0  0  0  0
  9 10  1  0  0  0  0
 10 11  1  0  0  0  0
 10 15  2  3  0  0  0
 11 12  2  3  0  0  0
 12 13  1  0  0  0  0
 12 16  1  0  0  0  0
 13 14  2  3  0  0  0
 14 15  1  0  0  0  0
 16 17  1  0  0  0  0
 16 21  2  3  0  0  0
 17 18  1  0  0  0  0
 17 33  2  3  0  0  0
 18 19  1  0  0  0  0
 18 29  2  3  0  0  0
 19 20  2  3  0  0  0
 20 21  1  0  0  0  0
 21 22  1  0  0  0  0
 22 23  1  0  0  0  0
 23 24  1  0  0  0  0
 23 28  2  3  0  0  0
 24 25  2  3  0  0  0
 25 26  1  0  0  0  0
 26 27  2  3  0  0  0
 27 28  1  0  0  0  0
 29 30  1  0  0  0  0
 29 31  1  0  0  0  0
 31 32  2  3  0  0  0
 32 33  1  0  0  0  0
 34 35  1  0  0  0  0
 34 36  1  0  0  0  0
 34 37  1  0  0  0  0
M  END
>  <VC-4>
0.013498731

>  <VC-6>
0.004499577

>  <SPC-4>
6.3257327

>  <SwHBa>
36.476002

>  <SHCsats>
0

>  <SHother>
7.9162407

>  <SssCH2>
0.71113932

>  <ETA_Shape_Y>
0.30693999

>  <ETA_dBetaP>
-0.0473

>  <nAtomP>
17

>  <MDEC-24>
2.1690898

>  <MDEC-33>
13.531515

>  <MDEC-34>
1.7021227

>  <MLFER_A>
0.003

>  <Classification>
1

$$$$
Clc1cc(ccc1N(C(CC)(C(OC)=O)c1ccccc1)CC)C(O)(C(F)(F)F)C(F)(F)F
  MOE2013           2D

 33 34  0  0  1  0  0  0  0  0999 V2000
    0.0000   -0.0000    0.0000 Cl  0  0  0  0  0  0  0  0  0  0  0  0
   -0.7478   -1.3003    0.0000 C   0  0  0  0  0  0  0  0  0  0  0  0
   -2.2478   -1.3029    0.0000 C   0  0  0  0  0  0  0  0  0  0  0  0
   -2.9955   -2.6033    0.0000 C   0  0  0  0  0  0  0  0  0  0  0  0
   -2.2433   -3.9010    0.0000 C   0  0  0  0  0  0  0  0  0  0  0  0
   -0.7433   -3.8984    0.0000 C   0  0  0  0  0  0  0  0  0  0  0  0
    0.0045   -2.5981    0.0000 C   0  0  0  0  0  0  0  0  0  0  0  0
    1.5045   -2.5955    0.0000 N   0  0  3  0  0  0  0  0  0  0  0  0
    2.2567   -3.8932    0.0000 C   0  0  3  0  0  0  0  0  0  0  0  0
    0.9590   -4.6455    0.0000 C   0  0  0  0  0  0  0  0  0  0  0  0
    0.9616   -6.1455    0.0000 C   0  0  0  0  0  0  0  0  0  0  0  0
    3.5545   -3.1410    0.0000 C   0  0  0  0  0  0  0  0  0  0  0  0
    3.5519   -1.6410    0.0000 O   0  0  0  0  0  0  0  0  0  0  0  0
    4.8496   -0.8887    0.0000 C   0  0  0  0  0  0  0  0  0  0  0  0
    4.8548   -3.8887    0.0000 O   0  0  0  0  0  0  0  0  0  0  0  0
    3.0090   -5.1910    0.0000 C   0  0  0  0  0  0  0  0  0  0  0  0
    4.5090   -5.1884    0.0000 C   0  0  0  0  0  0  0  0  0  0  0  0
    5.2612   -6.4861    0.0000 C   0  0  0  0  0  0  0  0  0  0  0  0
    4.5135   -7.7864    0.0000 C   0  0  0  0  0  0  0  0  0  0  0  0
    3.0135   -7.7890    0.0000 C   0  0  0  0  0  0  0  0  0  0  0  0
    2.2612   -6.4913    0.0000 C   0  0  0  0  0  0  0  0  0  0  0  0
    2.2522   -1.2951    0.0000 C   0  0  0  0  0  0  0  0  0  0  0  0
    1.5000    0.0026    0.0000 C   0  0  0  0  0  0  0  0  0  0  0  0
   -4.4955   -2.6059    0.0000 C   0  0  0  0  0  0  0  0  0  0  0  0
   -5.9955   -2.6084    0.0000 O   0  0  0  0  0  0  0  0  0  0  0  0
   -4.4929   -4.1058    0.0000 C   0  0  0  0  0  0  0  0  0  0  0  0
   -4.4903   -5.6058    0.0000 F   0  0  0  0  0  0  0  0  0  0  0  0
   -2.9929   -4.1033    0.0000 F   0  0  0  0  0  0  0  0  0  0  0  0
   -5.9929   -4.1084    0.0000 F   0  0  0  0  0  0  0  0  0  0  0  0
   -4.4981   -1.1059    0.0000 C   0  0  0  0  0  0  0  0  0  0  0  0
   -2.9981   -1.1033    0.0000 F   0  0  0  0  0  0  0  0  0  0  0  0
   -5.9981   -1.1084    0.0000 F   0  0  0  0  0  0  0  0  0  0  0  0
   -4.5007    0.3941    0.0000 F   0  0  0  0  0  0  0  0  0  0  0  0
  1  2  1  0  0  0  0
  2  3  1  0  0  0  0
  2  7  2  3  0  0  0
  3  4  2  3  0  0  0
  4  5  1  0  0  0  0
  4 24  1  0  0  0  0
  5  6  2  3  0  0  0
  6  7  1  0  0  0  0
  7  8  1  0  0  0  0
  8  9  1  0  0  0  0
  8 22  1  0  0  0  0
  9 10  1  0  0  0  0
  9 12  1  0  0  0  0
  9 16  1  0  0  0  0
 10 11  1  0  0  0  0
 12 13  1  0  0  0  0
 12 15  2  0  0  0  0
 13 14  1  0  0  0  0
 16 17  1  0  0  0  0
 16 21  2  3  0  0  0
 17 18  2  3  0  0  0
 18 19  1  0  0  0  0
 19 20  2  3  0  0  0
 20 21  1  0  0  0  0
 22 23  1  0  0  0  0
 24 25  1  0  0  0  0
 24 26  1  0  0  0  0
 24 30  1  0  0  0  0
 26 27  1  0  0  0  0
 26 28  1  0  0  0  0
 26 29  1  0  0  0  0
 30 31  1  0  0  0  0
 30 32  1  0  0  0  0
 30 33  1  0  0  0  0
M  END
>  <VC-4>
0.094476782

>  <VC-6>
0.085837476

>  <SPC-4>
10.442686

>  <SwHBa>
10.109955

>  <SHCsats>
2.3988647

>  <SHother>
4.6388073

>  <SssCH2>
0.42786855

>  <ETA_Shape_Y>
0.19557001

>  <ETA_dBetaP>
-0.30303001

>  <nAtomP>
7

>  <MDEC-24>
7.9505715

>  <MDEC-33>
3.3160064

>  <MDEC-34>
5.5960436

>  <MLFER_A>
0.85399997

>  <Classification>
0

$$$$
Oc1cc2c(CC[C@H]3[C@](CCC[C@]23C)(C(=O)NC23CC4CC(C2)CC(C3)C4)C)cc1
  MOE2013           2D

 30 35  0  0  1  0  0  0  0  0999 V2000
   -0.0000   -0.0000    0.0000 O   0  0  0  0  0  0  0  0  0  0  0  0
   -1.1417    0.9729    0.0000 C   0  0  0  0  0  0  0  0  0  0  0  0
   -2.5551    0.4707    0.0000 C   0  0  0  0  0  0  0  0  0  0  0  0
   -3.6968    1.4436    0.0000 C   0  0  0  0  0  0  0  0  0  0  0  0
   -3.4250    2.9188    0.0000 C   0  0  0  0  0  0  0  0  0  0  0  0
   -4.5667    3.8917    0.0000 C   0  0  0  0  0  0  0  0  0  0  0  0
   -5.9801    3.3894    0.0000 C   0  0  0  0  0  0  0  0  0  0  0  0
   -6.2519    1.9142    0.0000 C   0  0  1  0  0  0  0  0  0  0  0  0
   -7.6653    1.4120    0.0000 C   0  0  2  0  0  0  0  0  0  0  0  0
   -7.9370   -0.0632    0.0000 C   0  0  0  0  0  0  0  0  0  0  0  0
   -6.7953   -1.0361    0.0000 C   0  0  0  0  0  0  0  0  0  0  0  0
   -5.3819   -0.5339    0.0000 C   0  0  0  0  0  0  0  0  0  0  0  0
   -5.1102    0.9413    0.0000 C   0  0  2  0  0  0  0  0  0  0  0  0
   -3.9685   -0.0316    0.0000 C   0  0  0  0  0  0  0  0  0  0  0  0
   -9.1405    1.6837    0.0000 C   0  0  0  0  0  0  0  0  0  0  0  0
   -9.6427    3.0971    0.0000 O   0  0  0  0  0  0  0  0  0  0  0  0
  -10.1134    0.5420    0.0000 N   0  0  0  0  0  0  0  0  0  0  0  0
  -11.5886    0.8137    0.0000 C   0  0  0  0  0  0  0  0  0  0  0  0
  -12.9721    0.0762    0.0000 C   0  0  0  0  0  0  0  0  0  0  0  0
  -14.4887    0.4023    0.0000 C   0  0  0  0  0  0  0  0  0  0  0  0
  -14.7454    1.8549    0.0000 C   0  0  0  0  0  0  0  0  0  0  0  0
  -13.3199    2.5614    0.0000 C   0  0  0  0  0  0  0  0  0  0  0  0
  -11.8610    2.2610    0.0000 C   0  0  0  0  0  0  0  0  0  0  0  0
  -13.9320    1.3003    0.0000 C   0  0  0  0  0  0  0  0  0  0  0  0
  -13.7313   -0.0648    0.0000 C   0  0  0  0  0  0  0  0  0  0  0  0
  -12.3189   -0.3763    0.0000 C   0  0  0  0  0  0  0  0  0  0  0  0
  -15.1930   -0.9453    0.0000 C   0  0  0  0  0  0  0  0  0  0  0  0
   -8.1675    2.8254    0.0000 C   0  0  0  0  0  0  0  0  0  0  0  0
   -2.0116    3.4210    0.0000 C   0  0  0  0  0  0  0  0  0  0  0  0
   -0.8699    2.4481    0.0000 C   0  0  0  0  0  0  0  0  0  0  0  0
  1  2  1  0  0  0  0
  2  3  1  0  0  0  0
  2 30  2  3  0  0  0
  3  4  2  3  0  0  0
  4  5  1  0  0  0  0
  4 13  1  0  0  0  0
  5  6  1  0  0  0  0
  5 29  2  3  0  0  0
  6  7  1  0  0  0  0
  8  7  1  6  0  0  0
  8  9  1  0  0  0  0
  8 13  1  0  0  0  0
  9 10  1  0  0  0  0
  9 15  1  6  0  0  0
  9 28  1  1  0  0  0
 10 11  1  0  0  0  0
 11 12  1  0  0  0  0
 12 13  1  0  0  0  0
 13 14  1  6  0  0  0
 15 16  2  0  0  0  0
 15 17  1  0  0  0  0
 17 18  1  0  0  0  0
 18 19  1  0  0  0  0
 18 23  1  0  0  0  0
 18 26  1  0  0  0  0
 19 20  1  0  0  0  0
 20 21  1  0  0  0  0
 20 27  1  0  0  0  0
 21 22  1  0  0  0  0
 22 23  1  0  0  0  0
 22 24  1  0  0  0  0
 24 25  1  0  0  0  0
 25 26  1  0  0  0  0
 25 27  1  0  0  0  0
 29 30  1  0  0  0  0
M  END
>  <VC-4>
0.29251251

>  <VC-6>
0.1224649

>  <SPC-4>
8.0420122

>  <SwHBa>
9.2886353

>  <SHCsats>
5.9157796

>  <SHother>
1.2350514

>  <SssCH2>
13.210806

>  <ETA_Shape_Y>
0.2746

>  <ETA_dBetaP>
-0.41666999

>  <nAtomP>
7

>  <MDEC-24>
11.614498

>  <MDEC-33>
6.2920237

>  <MDEC-34>
7.5908155

>  <MLFER_A>
0.91399997

>  <Classification>
0

$$$$
FC(F)(F)C(O)(C(F)(F)F)c1ccc(N2CCCCC2(C(OC)=O)c2ccccc2)cc1
  MOE2013           2D

 32 34  0  0  1  0  0  0  0  0999 V2000
    0.0000   -0.0000    0.0000 F   0  0  0  0  0  0  0  0  0  0  0  0
    1.5000    0.0031    0.0000 C   0  0  0  0  0  0  0  0  0  0  0  0
    1.5031   -1.4969    0.0000 F   0  0  0  0  0  0  0  0  0  0  0  0
    3.0000    0.0063    0.0000 F   0  0  0  0  0  0  0  0  0  0  0  0
    1.4969    1.5031    0.0000 C   0  0  0  0  0  0  0  0  0  0  0  0
   -0.0031    1.5000    0.0000 O   0  0  0  0  0  0  0  0  0  0  0  0
    1.4937    3.0031    0.0000 C   0  0  0  0  0  0  0  0  0  0  0  0
    2.9937    3.0063    0.0000 F   0  0  0  0  0  0  0  0  0  0  0  0
   -0.0063    3.0000    0.0000 F   0  0  0  0  0  0  0  0  0  0  0  0
    1.4906    4.5031    0.0000 F   0  0  0  0  0  0  0  0  0  0  0  0
    2.9968    1.5063    0.0000 C   0  0  0  0  0  0  0  0  0  0  0  0
    3.7496    0.2088    0.0000 C   0  0  0  0  0  0  0  0  0  0  0  0
    5.2496    0.2120    0.0000 C   0  0  0  0  0  0  0  0  0  0  0  0
    5.9968    1.5126    0.0000 C   0  0  0  0  0  0  0  0  0  0  0  0
    7.4735    1.7761    0.0000 N   0  0  3  0  0  0  0  0  0  0  0  0
    7.7309    3.2539    0.0000 C   0  0  0  0  0  0  0  0  0  0  0  0
    9.1393    3.7699    0.0000 C   0  0  0  0  0  0  0  0  0  0  0  0
   10.2904    2.8081    0.0000 C   0  0  0  0  0  0  0  0  0  0  0  0
   10.0330    1.3304    0.0000 C   0  0  0  0  0  0  0  0  0  0  0  0
    8.6246    0.8144    0.0000 C   0  0  3  0  0  0  0  0  0  0  0  0
    9.5912   -0.3327    0.0000 C   0  0  0  0  0  0  0  0  0  0  0  0
   11.0678   -0.0691    0.0000 O   0  0  0  0  0  0  0  0  0  0  0  0
   12.0344   -1.2161    0.0000 C   0  0  0  0  0  0  0  0  0  0  0  0
    9.4636   -1.8272    0.0000 O   0  0  0  0  0  0  0  0  0  0  0  0
    7.6628   -0.3367    0.0000 C   0  0  0  0  0  0  0  0  0  0  0  0
    8.6294   -1.4837    0.0000 C   0  0  0  0  0  0  0  0  0  0  0  0
    8.1193   -2.8944    0.0000 C   0  0  0  0  0  0  0  0  0  0  0  0
    6.6427   -3.1579    0.0000 C   0  0  0  0  0  0  0  0  0  0  0  0
    5.6761   -2.0109    0.0000 C   0  0  0  0  0  0  0  0  0  0  0  0
    6.1862   -0.6003    0.0000 C   0  0  0  0  0  0  0  0  0  0  0  0
    5.2441    2.8100    0.0000 C   0  0  0  0  0  0  0  0  0  0  0  0
    3.7441    2.8069    0.0000 C   0  0  0  0  0  0  0  0  0  0  0  0
  1  2  1  0  0  0  0
  2  3  1  0  0  0  0
  2  4  1  0  0  0  0
  2  5  1  0  0  0  0
  5  6  1  0  0  0  0
  5  7  1  0  0  0  0
  5 11  1  0  0  0  0
  7  8  1  0  0  0  0
  7  9  1  0  0  0  0
  7 10  1  0  0  0  0
 11 12  1  0  0  0  0
 11 32  2  3  0  0  0
 12 13  2  3  0  0  0
 13 14  1  0  0  0  0
 14 15  1  0  0  0  0
 14 31  2  3  0  0  0
 15 16  1  0  0  0  0
 15 20  1  0  0  0  0
 16 17  1  0  0  0  0
 17 18  1  0  0  0  0
 18 19  1  0  0  0  0
 19 20  1  0  0  0  0
 20 21  1  0  0  0  0
 20 25  1  0  0  0  0
 21 22  1  0  0  0  0
 21 24  2  0  0  0  0
 22 23  1  0  0  0  0
 25 26  1  0  0  0  0
 25 30  2  3  0  0  0
 26 27  2  3  0  0  0
 27 28  1  0  0  0  0
 28 29  2  3  0  0  0
 29 30  1  0  0  0  0
 31 32  1  0  0  0  0
M  END
>  <VC-4>
0.094476782

>  <VC-6>
0.085837476

>  <SPC-4>
9.8438902

>  <SwHBa>
10.77253

>  <SHCsats>
2.4017282

>  <SHother>
5.3864727

>  <SssCH2>
1.9955096

>  <ETA_Shape_Y>
0.17004

>  <ETA_dBetaP>
-0.30469

>  <nAtomP>
7

>  <MDEC-24>
10.345163

>  <MDEC-33>
1.6983813

>  <MDEC-34>
4.44203

>  <MLFER_A>
0.85399997

>  <Classification>
0

$$$$
Clc1cc(ccc1)-c1oc(C)c(n1)CN(CC(F)(F)F)c1ccc(cc1)C(O)(C(F)(F)F)C(F)(F)F
  MOE2013           2D

 36 38  0  0  1  0  0  0  0  0999 V2000
   -0.0000    0.0000    0.0000 Cl  0  0  0  0  0  0  0  0  0  0  0  0
   -1.3672   -0.6170    0.0000 C   0  0  0  0  0  0  0  0  0  0  0  0
   -2.5852    0.2585    0.0000 C   0  0  0  0  0  0  0  0  0  0  0  0
   -3.9524   -0.3586    0.0000 C   0  0  0  0  0  0  0  0  0  0  0  0
   -4.1016   -1.8511    0.0000 C   0  0  0  0  0  0  0  0  0  0  0  0
   -2.8836   -2.7267    0.0000 C   0  0  0  0  0  0  0  0  0  0  0  0
   -1.5164   -2.1096    0.0000 C   0  0  0  0  0  0  0  0  0  0  0  0
   -5.1704    0.5169    0.0000 C   0  0  0  0  0  0  0  0  0  0  0  0
   -5.1780    2.0169    0.0000 O   0  0  0  0  0  0  0  0  0  0  0  0
   -6.6069    2.4732    0.0000 C   0  0  0  0  0  0  0  0  0  0  0  0
   -7.0777    3.8974    0.0000 C   0  0  0  0  0  0  0  0  0  0  0  0
   -7.4824    1.2552    0.0000 C   0  0  0  0  0  0  0  0  0  0  0  0
   -6.5946    0.0462    0.0000 N   0  0  0  0  0  0  0  0  0  0  0  0
   -8.9824    1.2476    0.0000 C   0  0  0  0  0  0  0  0  0  0  0  0
   -9.7258   -0.0552    0.0000 N   0  0  3  0  0  0  0  0  0  0  0  0
   -8.9692   -1.3505    0.0000 C   0  0  0  0  0  0  0  0  0  0  0  0
   -9.7126   -2.6533    0.0000 C   0  0  0  0  0  0  0  0  0  0  0  0
  -11.0154   -1.9099    0.0000 F   0  0  0  0  0  0  0  0  0  0  0  0
  -10.4560   -3.9561    0.0000 F   0  0  0  0  0  0  0  0  0  0  0  0
   -8.4098   -3.3967    0.0000 F   0  0  0  0  0  0  0  0  0  0  0  0
  -11.2258   -0.0628    0.0000 C   0  0  0  0  0  0  0  0  0  0  0  0
  -11.9824    1.2324    0.0000 C   0  0  0  0  0  0  0  0  0  0  0  0
  -13.4823    1.2248    0.0000 C   0  0  0  0  0  0  0  0  0  0  0  0
  -14.2257   -0.0781    0.0000 C   0  0  0  0  0  0  0  0  0  0  0  0
  -13.4692   -1.3733    0.0000 C   0  0  0  0  0  0  0  0  0  0  0  0
  -11.9692   -1.3657    0.0000 C   0  0  0  0  0  0  0  0  0  0  0  0
  -15.7257   -0.0857    0.0000 C   0  0  0  0  0  0  0  0  0  0  0  0
  -17.2257   -0.0933    0.0000 O   0  0  0  0  0  0  0  0  0  0  0  0
  -15.7181   -1.5857    0.0000 C   0  0  0  0  0  0  0  0  0  0  0  0
  -14.2181   -1.5781    0.0000 F   0  0  0  0  0  0  0  0  0  0  0  0
  -17.2181   -1.5933    0.0000 F   0  0  0  0  0  0  0  0  0  0  0  0
  -15.7105   -3.0856    0.0000 F   0  0  0  0  0  0  0  0  0  0  0  0
  -15.7333    1.4143    0.0000 C   0  0  0  0  0  0  0  0  0  0  0  0
  -17.2333    1.4067    0.0000 F   0  0  0  0  0  0  0  0  0  0  0  0
  -15.7409    2.9143    0.0000 F   0  0  0  0  0  0  0  0  0  0  0  0
  -14.2333    1.4219    0.0000 F   0  0  0  0  0  0  0  0  0  0  0  0
  1  2  1  0  0  0  0
  2  3  1  0  0  0  0
  2  7  2  3  0  0  0
  3  4  2  3  0  0  0
  4  5  1  0  0  0  0
  4  8  1  0  0  0  0
  5  6  2  3  0  0  0
  6  7  1  0  0  0  0
  8  9  1  0  0  0  0
  8 13  2  3  0  0  0
  9 10  1  0  0  0  0
 10 11  1  0  0  0  0
 10 12  2  3  0  0  0
 12 13  1  0  0  0  0
 12 14  1  0  0  0  0
 14 15  1  0  0  0  0
 15 16  1  0  0  0  0
 15 21  1  0  0  0  0
 16 17  1  0  0  0  0
 17 18  1  0  0  0  0
 17 19  1  0  0  0  0
 17 20  1  0  0  0  0
 21 22  1  0  0  0  0
 21 26  2  3  0  0  0
 22 23  2  3  0  0  0
 23 24  1  0  0  0  0
 24 25  2  3  0  0  0
 24 27  1  0  0  0  0
 25 26  1  0  0  0  0
 27 28  1  0  0  0  0
 27 29  1  0  0  0  0
 27 33  1  0  0  0  0
 29 30  1  0  0  0  0
 29 31  1  0  0  0  0
 29 32  1  0  0  0  0
 33 34  1  0  0  0  0
 33 35  1  0  0  0  0
 33 36  1  0  0  0  0
M  END
>  <VC-4>
0.074038401

>  <VC-6>
0.05209782

>  <SPC-4>
9.8623161

>  <SwHBa>
9.213892

>  <SHCsats>
1.1493961

>  <SHother>
5.3381367

>  <SssCH2>
-2.0764375

>  <ETA_Shape_Y>
0.24758001

>  <ETA_dBetaP>
-0.31944001

>  <nAtomP>
11

>  <MDEC-24>
6.8078098

>  <MDEC-33>
5.5169764

>  <MDEC-34>
4.3858919

>  <MLFER_A>
0.85399997

>  <Classification>
0

$$$$
Oc1cc2c(CC[C@H]3[C@](CCC[C@]23C)(C(=O)N2C[C@H](CCC2)c2ccccc2)C)cc1
  MOE2013           2D

 31 35  0  0  1  0  0  0  0  0999 V2000
    0.0000    0.0000    0.0000 O   0  0  0  0  0  0  0  0  0  0  0  0
    1.2976   -0.7525    0.0000 C   0  0  0  0  0  0  0  0  0  0  0  0
    2.5981   -0.0050    0.0000 C   0  0  0  0  0  0  0  0  0  0  0  0
    3.8957   -0.7576    0.0000 C   0  0  0  0  0  0  0  0  0  0  0  0
    3.8927   -2.2576    0.0000 C   0  0  0  0  0  0  0  0  0  0  0  0
    5.1903   -3.0101    0.0000 C   0  0  0  0  0  0  0  0  0  0  0  0
    6.4908   -2.2626    0.0000 C   0  0  0  0  0  0  0  0  0  0  0  0
    6.4937   -0.7626    0.0000 C   0  0  1  0  0  0  0  0  0  0  0  0
    7.7942   -0.0151    0.0000 C   0  0  2  0  0  0  0  0  0  0  0  0
    7.7971    1.4849    0.0000 C   0  0  0  0  0  0  0  0  0  0  0  0
    6.4995    2.2374    0.0000 C   0  0  0  0  0  0  0  0  0  0  0  0
    5.1991    1.4899    0.0000 C   0  0  0  0  0  0  0  0  0  0  0  0
    5.1961   -0.0101    0.0000 C   0  0  2  0  0  0  0  0  0  0  0  0
    3.8986    0.7424    0.0000 C   0  0  0  0  0  0  0  0  0  0  0  0
    9.2942   -0.0180    0.0000 C   0  0  0  0  0  0  0  0  0  0  0  0
   10.0417   -1.3185    0.0000 O   0  0  0  0  0  0  0  0  0  0  0  0
   10.0467    1.2795    0.0000 N   0  0  0  0  0  0  0  0  0  0  0  0
   11.5467    1.2766    0.0000 C   0  0  0  0  0  0  0  0  0  0  0  0
   12.2992    2.5742    0.0000 C   0  0  2  0  0  0  0  0  0  0  0  0
   11.5518    3.8747    0.0000 C   0  0  0  0  0  0  0  0  0  0  0  0
   10.0518    3.8776    0.0000 C   0  0  0  0  0  0  0  0  0  0  0  0
    9.2993    2.5800    0.0000 C   0  0  0  0  0  0  0  0  0  0  0  0
   13.7992    2.5713    0.0000 C   0  0  0  0  0  0  0  0  0  0  0  0
   14.5467    1.2708    0.0000 C   0  0  0  0  0  0  0  0  0  0  0  0
   16.0467    1.2679    0.0000 C   0  0  0  0  0  0  0  0  0  0  0  0
   16.7992    2.5655    0.0000 C   0  0  0  0  0  0  0  0  0  0  0  0
   16.0518    3.8660    0.0000 C   0  0  0  0  0  0  0  0  0  0  0  0
   14.5518    3.8689    0.0000 C   0  0  0  0  0  0  0  0  0  0  0  0
    8.5417   -1.3156    0.0000 C   0  0  0  0  0  0  0  0  0  0  0  0
    2.5922   -3.0050    0.0000 C   0  0  0  0  0  0  0  0  0  0  0  0
    1.2947   -2.2525    0.0000 C   0  0  0  0  0  0  0  0  0  0  0  0
  1  2  1  0  0  0  0
  2  3  1  0  0  0  0
  2 31  2  3  0  0  0
  3  4  2  3  0  0  0
  4  5  1  0  0  0  0
  4 13  1  0  0  0  0
  5  6  1  0  0  0  0
  5 30  2  3  0  0  0
  6  7  1  0  0  0  0
  8  7  1  6  0  0  0
  8  9  1  0  0  0  0
  8 13  1  0  0  0  0
  9 10  1  0  0  0  0
  9 15  1  6  0  0  0
  9 29  1  1  0  0  0
 10 11  1  0  0  0  0
 11 12  1  0  0  0  0
 12 13  1  0  0  0  0
 13 14  1  6  0  0  0
 15 16  2  0  0  0  0
 15 17  1  0  0  0  0
 17 18  1  0  0  0  0
 17 22  1  0  0  0  0
 18 19  1  0  0  0  0
 19 20  1  0  0  0  0
 19 23  1  6  0  0  0
 20 21  1  0  0  0  0
 21 22  1  0  0  0  0
 23 24  1  0  0  0  0
 23 28  2  3  0  0  0
 24 25  2  3  0  0  0
 25 26  1  0  0  0  0
 26 27  2  3  0  0  0
 27 28  1  0  0  0  0
 30 31  1  0  0  0  0
M  END
>  <VC-4>
0.20412414

>  <VC-6>
0.12026547

>  <SPC-4>
7.1738992

>  <SwHBa>
21.305933

>  <SHCsats>
5.6553421

>  <SHother>
3.2318599

>  <SssCH2>
9.1990576

>  <ETA_Shape_Y>
0.25885001

>  <ETA_dBetaP>
-0.26613

>  <nAtomP>
7

>  <MDEC-24>
8.3614473

>  <MDEC-33>
5.2434535

>  <MDEC-34>
5.2550616

>  <MLFER_A>
0.546

>  <Classification>
0

$$$$
Clc1cc2c3C[C@H](Cc3[nH]c2cc1)[C@@](S(=O)(=O)c1ccccc1)(F)C(=O)N(C)C
  MOE2013           2D

 29 32  0  0  1  0  0  0  0  0999 V2000
   -0.0000   -0.0000    0.0000 Cl  0  0  0  0  0  0  0  0  0  0  0  0
   -1.1705    0.9380    0.0000 C   0  0  0  0  0  0  0  0  0  0  0  0
   -2.5681    0.3933    0.0000 C   0  0  0  0  0  0  0  0  0  0  0  0
   -3.7386    1.3314    0.0000 C   0  0  0  0  0  0  0  0  0  0  0  0
   -5.2190    1.0892    0.0000 C   0  0  0  0  0  0  0  0  0  0  0  0
   -6.2742    0.0231    0.0000 C   0  0  0  0  0  0  0  0  0  0  0  0
   -7.6142    0.6973    0.0000 C   0  0  2  0  0  0  0  0  0  0  0  0
   -7.3871    2.1800    0.0000 C   0  0  0  0  0  0  0  0  0  0  0  0
   -5.9068    2.4222    0.0000 C   0  0  0  0  0  0  0  0  0  0  0  0
   -4.8515    3.4882    0.0000 N   0  0  0  0  0  0  0  0  0  0  0  0
   -3.5116    2.8141    0.0000 C   0  0  0  0  0  0  0  0  0  0  0  0
   -2.1139    3.3588    0.0000 C   0  0  0  0  0  0  0  0  0  0  0  0
   -0.9434    2.4207    0.0000 C   0  0  0  0  0  0  0  0  0  0  0  0
   -8.9472    0.0095    0.0000 C   0  0  1  0  0  0  0  0  0  0  0  0
   -9.6350    1.3425    0.0000 S   0  0  0  0  0  0  0  0  0  0  0  0
   -8.3020    2.0303    0.0000 O   0  0  0  0  0  0  0  0  0  0  0  0
  -10.9680    0.6547    0.0000 O   0  0  0  0  0  0  0  0  0  0  0  0
  -10.3228    2.6755    0.0000 C   0  0  0  0  0  0  0  0  0  0  0  0
  -11.8211    2.7464    0.0000 C   0  0  0  0  0  0  0  0  0  0  0  0
  -12.5089    4.0794    0.0000 C   0  0  0  0  0  0  0  0  0  0  0  0
  -11.6984    5.3415    0.0000 C   0  0  0  0  0  0  0  0  0  0  0  0
  -10.2000    5.2707    0.0000 C   0  0  0  0  0  0  0  0  0  0  0  0
   -9.5122    3.9377    0.0000 C   0  0  0  0  0  0  0  0  0  0  0  0
  -10.4455    0.0803    0.0000 F   0  0  0  0  0  0  0  0  0  0  0  0
   -9.0180   -1.4889    0.0000 C   0  0  0  0  0  0  0  0  0  0  0  0
   -7.7559   -2.2994    0.0000 O   0  0  0  0  0  0  0  0  0  0  0  0
  -10.3511   -2.1767    0.0000 N   0  0  0  0  0  0  0  0  0  0  0  0
  -11.6132   -1.3661    0.0000 C   0  0  0  0  0  0  0  0  0  0  0  0
  -10.4219   -3.6750    0.0000 C   0  0  0  0  0  0  0  0  0  0  0  0
  1  2  1  0  0  0  0
  2  3  1  0  0  0  0
  2 13  2  3  0  0  0
  3  4  2  3  0  0  0
  4  5  1  0  0  0  0
  4 11  1  0  0  0  0
  5  6  1  0  0  0  0
  5  9  2  3  0  0  0
  7  6  1  1  0  0  0
  7  8  1  0  0  0  0
  7 14  1  0  0  0  0
  8  9  1  0  0  0  0
  9 10  1  0  0  0  0
 10 11  1  0  0  0  0
 11 12  2  3  0  0  0
 12 13  1  0  0  0  0
 14 15  1  1  0  0  0
 14 24  1  6  0  0  0
 14 25  1  0  0  0  0
 15 16  2  0  0  0  0
 15 17  2  0  0  0  0
 15 18  1  0  0  0  0
 18 19  1  0  0  0  0
 18 23  2  3  0  0  0
 19 20  2  3  0  0  0
 20 21  1  0  0  0  0
 21 22  2  3  0  0  0
 22 23  1  0  0  0  0
 25 26  2  0  0  0  0
 25 27  1  0  0  0  0
 27 28  1  0  0  0  0
 27 29  1  0  0  0  0
M  END
>  <VC-4>
0.058886383

>  <VC-6>
0.068227924

>  <SPC-4>
8.4237843

>  <SwHBa>
17.815271

>  <SHCsats>
2.2201853

>  <SHother>
3.993264

>  <SssCH2>
0.44502255

>  <ETA_Shape_Y>
0.31132001

>  <ETA_dBetaP>
-0.14655

>  <nAtomP>
9

>  <MDEC-24>
2.6414282

>  <MDEC-33>
8.9668369

>  <MDEC-34>
3.0639613

>  <MLFER_A>
0.37400001

>  <Classification>
1

$$$$
S(=O)(=O)(C)c1cc(Oc2cc(ccc2)-c2c3c(ncc2C(=O)N)c(ccc3)C(F)(F)F)ccc1
  MOE2013           2D

 34 37  0  0  0  0  0  0  0  0999 V2000
    0.0000   -0.0000    0.0000 S   0  0  0  0  0  0  0  0  0  0  0  0
    0.7487   -1.2998    0.0000 O   0  0  0  0  0  0  0  0  0  0  0  0
   -0.7487    1.2998    0.0000 O   0  0  0  0  0  0  0  0  0  0  0  0
    1.2998    0.7487    0.0000 C   0  0  0  0  0  0  0  0  0  0  0  0
   -1.2998   -0.7487    0.0000 C   0  0  0  0  0  0  0  0  0  0  0  0
   -2.5981    0.0026    0.0000 C   0  0  0  0  0  0  0  0  0  0  0  0
   -3.8979   -0.7461    0.0000 C   0  0  0  0  0  0  0  0  0  0  0  0
   -5.1961    0.0052    0.0000 O   0  0  0  0  0  0  0  0  0  0  0  0
   -6.4959   -0.7435    0.0000 C   0  0  0  0  0  0  0  0  0  0  0  0
   -7.7942    0.0078    0.0000 C   0  0  0  0  0  0  0  0  0  0  0  0
   -9.0940   -0.7408    0.0000 C   0  0  0  0  0  0  0  0  0  0  0  0
   -9.0955   -2.2408    0.0000 C   0  0  0  0  0  0  0  0  0  0  0  0
   -7.7972   -2.9922    0.0000 C   0  0  0  0  0  0  0  0  0  0  0  0
   -6.4975   -2.2435    0.0000 C   0  0  0  0  0  0  0  0  0  0  0  0
  -10.3923    0.0105    0.0000 C   0  0  0  0  0  0  0  0  0  0  0  0
  -10.3908    1.5105    0.0000 C   0  0  0  0  0  0  0  0  0  0  0  0
  -11.6891    2.2618    0.0000 C   0  0  0  0  0  0  0  0  0  0  0  0
  -12.9889    1.5131    0.0000 N   0  0  0  0  0  0  0  0  0  0  0  0
  -12.9904    0.0131    0.0000 C   0  0  0  0  0  0  0  0  0  0  0  0
  -11.6921   -0.7382    0.0000 C   0  0  0  0  0  0  0  0  0  0  0  0
  -11.6936   -2.2382    0.0000 C   0  0  0  0  0  0  0  0  0  0  0  0
  -10.3953   -2.9895    0.0000 O   0  0  0  0  0  0  0  0  0  0  0  0
  -12.9934   -2.9869    0.0000 N   0  0  0  0  0  0  0  0  0  0  0  0
  -11.6876    3.7618    0.0000 C   0  0  0  0  0  0  0  0  0  0  0  0
  -10.3878    4.5105    0.0000 C   0  0  0  0  0  0  0  0  0  0  0  0
   -9.0895    3.7591    0.0000 C   0  0  0  0  0  0  0  0  0  0  0  0
   -9.0910    2.2591    0.0000 C   0  0  0  0  0  0  0  0  0  0  0  0
  -12.9858    4.5131    0.0000 C   0  0  0  0  0  0  0  0  0  0  0  0
  -14.2841    5.2644    0.0000 F   0  0  0  0  0  0  0  0  0  0  0  0
  -13.7372    3.2148    0.0000 F   0  0  0  0  0  0  0  0  0  0  0  0
  -12.2345    5.8114    0.0000 F   0  0  0  0  0  0  0  0  0  0  0  0
   -3.8994   -2.2461    0.0000 C   0  0  0  0  0  0  0  0  0  0  0  0
   -2.6011   -2.9974    0.0000 C   0  0  0  0  0  0  0  0  0  0  0  0
   -1.3013   -2.2487    0.0000 C   0  0  0  0  0  0  0  0  0  0  0  0
  1  2  2  0  0  0  0
  1  3  2  0  0  0  0
  1  4  1  0  0  0  0
  1  5  1  0  0  0  0
  5  6  1  0  0  0  0
  5 34  2  3  0  0  0
  6  7  2  3  0  0  0
  7  8  1  0  0  0  0
  7 32  1  0  0  0  0
  8  9  1  0  0  0  0
  9 10  1  0  0  0  0
  9 14  2  3  0  0  0
 10 11  2  3  0  0  0
 11 12  1  0  0  0  0
 11 15  1  0  0  0  0
 12 13  2  3  0  0  0
 13 14  1  0  0  0  0
 15 16  1  0  0  0  0
 15 20  2  3  0  0  0
 16 17  1  0  0  0  0
 16 27  2  3  0  0  0
 17 18  1  0  0  0  0
 17 24  2  3  0  0  0
 18 19  2  3  0  0  0
 19 20  1  0  0  0  0
 20 21  1  0  0  0  0
 21 22  2  0  0  0  0
 21 23  1  0  0  0  0
 24 25  1  0  0  0  0
 24 28  1  0  0  0  0
 25 26  2  3  0  0  0
 26 27  1  0  0  0  0
 28 29  1  0  0  0  0
 28 30  1  0  0  0  0
 28 31  1  0  0  0  0
 32 33  2  3  0  0  0
 33 34  1  0  0  0  0
M  END
>  <VC-4>
0.064497903

>  <VC-6>
0.020896472

>  <SPC-4>
6.9700766

>  <SwHBa>
16.351765

>  <SHCsats>
0

>  <SHother>
7.5374966

>  <SssCH2>
0

>  <ETA_Shape_Y>
0.31597999

>  <ETA_dBetaP>
-0.029410001

>  <nAtomP>
29

>  <MDEC-24>
1.9734976

>  <MDEC-33>
13.281834

>  <MDEC-34>
2.2924318

>  <MLFER_A>
0.45500001

>  <Classification>
1

$$$$
ClC=1c2n(C=CC=1)c(-c1cc(Oc3cc(S(=O)(=O)NC)ccc3)ccc1)c(n2)C(C)C
  MOE2013           2D

 31 34  0  0  0  0  0  0  0  0999 V2000
    0.0000   -0.0000    0.0000 Cl  0  0  0  0  0  0  0  0  0  0  0  0
    1.5000    0.0099    0.0000 C   0  0  0  0  0  0  0  0  0  0  0  0
    2.2414    1.3139    0.0000 C   0  0  0  0  0  0  0  0  0  0  0  0
    3.7413    1.3238    0.0000 N   0  0  0  0  0  0  0  0  0  0  0  0
    4.4999    0.0298    0.0000 C   0  0  0  0  0  0  0  0  0  0  0  0
    3.7585   -1.2742    0.0000 C   0  0  0  0  0  0  0  0  0  0  0  0
    2.2585   -1.2841    0.0000 C   0  0  0  0  0  0  0  0  0  0  0  0
    4.1954    2.7534    0.0000 C   0  0  0  0  0  0  0  0  0  0  0  0
    5.6189    3.2264    0.0000 C   0  0  0  0  0  0  0  0  0  0  0  0
    6.7402    2.2301    0.0000 C   0  0  0  0  0  0  0  0  0  0  0  0
    8.1637    2.7030    0.0000 C   0  0  0  0  0  0  0  0  0  0  0  0
    9.2850    1.7067    0.0000 O   0  0  0  0  0  0  0  0  0  0  0  0
   10.7085    2.1797    0.0000 C   0  0  0  0  0  0  0  0  0  0  0  0
   11.8299    1.1834    0.0000 C   0  0  0  0  0  0  0  0  0  0  0  0
   13.2534    1.6563    0.0000 C   0  0  0  0  0  0  0  0  0  0  0  0
   14.3747    0.6600    0.0000 S   0  0  0  0  0  0  0  0  0  0  0  0
   15.3710    1.7813    0.0000 O   0  0  0  0  0  0  0  0  0  0  0  0
   13.3784   -0.4613    0.0000 O   0  0  0  0  0  0  0  0  0  0  0  0
   15.4960   -0.3363    0.0000 N   0  0  0  0  0  0  0  0  0  0  0  0
   16.9195    0.1366    0.0000 C   0  0  0  0  0  0  0  0  0  0  0  0
   13.5555    3.1256    0.0000 C   0  0  0  0  0  0  0  0  0  0  0  0
   12.4342    4.1219    0.0000 C   0  0  0  0  0  0  0  0  0  0  0  0
   11.0107    3.6489    0.0000 C   0  0  0  0  0  0  0  0  0  0  0  0
    8.4659    4.1723    0.0000 C   0  0  0  0  0  0  0  0  0  0  0  0
    7.3445    5.1686    0.0000 C   0  0  0  0  0  0  0  0  0  0  0  0
    5.9211    4.6956    0.0000 C   0  0  0  0  0  0  0  0  0  0  0  0
    2.9761    3.6271    0.0000 C   0  0  0  0  0  0  0  0  0  0  0  0
    1.7684    2.7374    0.0000 N   0  0  0  0  0  0  0  0  0  0  0  0
    2.9662    5.1270    0.0000 C   0  0  0  0  0  0  0  0  0  0  0  0
    4.2602    5.8856    0.0000 C   0  0  0  0  0  0  0  0  0  0  0  0
    1.6622    5.8684    0.0000 C   0  0  0  0  0  0  0  0  0  0  0  0
  1  2  1  0  0  0  0
  2  3  1  0  0  0  0
  2  7  2  3  0  0  0
  3  4  1  0  0  0  0
  3 28  2  3  0  0  0
  4  5  1  0  0  0  0
  4  8  1  0  0  0  0
  5  6  2  3  0  0  0
  6  7  1  0  0  0  0
  8  9  1  0  0  0  0
  8 27  2  3  0  0  0
  9 10  1  0  0  0  0
  9 26  2  3  0  0  0
 10 11  2  3  0  0  0
 11 12  1  0  0  0  0
 11 24  1  0  0  0  0
 12 13  1  0  0  0  0
 13 14  1  0  0  0  0
 13 23  2  3  0  0  0
 14 15  2  3  0  0  0
 15 16  1  0  0  0  0
 15 21  1  0  0  0  0
 16 17  2  0  0  0  0
 16 18  2  0  0  0  0
 16 19  1  0  0  0  0
 19 20  1  0  0  0  0
 21 22  2  3  0  0  0
 22 23  1  0  0  0  0
 24 25  2  3  0  0  0
 25 26  1  0  0  0  0
 27 28  1  0  0  0  0
 27 29  1  0  0  0  0
 29 30  1  0  0  0  0
 29 31  1  0  0  0  0
M  END
>  <VC-4>
0.025499586

>  <VC-6>
0.0084998617

>  <SPC-4>
6.2519646

>  <SwHBa>
27.643616

>  <SHCsats>
1.4168814

>  <SHother>
5.8497982

>  <SssCH2>
0

>  <ETA_Shape_Y>
0.32135999

>  <ETA_dBetaP>
-0.080650002

>  <nAtomP>
26

>  <MDEC-24>
0

>  <MDEC-33>
10.236419

>  <MDEC-34>
0

>  <MLFER_A>
0.359

>  <Classification>
1

$$$$
FC(F)(F)C(O)(C(F)(F)F)c1ccc(N(Cc2ccncc2)CC)cc1
  MOE2013           2D

 26 27  0  0  1  0  0  0  0  0999 V2000
    0.0000    0.0000    0.0000 F   0  0  0  0  0  0  0  0  0  0  0  0
    0.7573   -1.2948    0.0000 C   0  0  0  0  0  0  0  0  0  0  0  0
   -0.5376   -2.0521    0.0000 F   0  0  0  0  0  0  0  0  0  0  0  0
    2.0521   -0.5376    0.0000 F   0  0  0  0  0  0  0  0  0  0  0  0
    1.5145   -2.5897    0.0000 C   0  0  0  0  0  0  0  0  0  0  0  0
    0.2197   -3.3469    0.0000 O   0  0  0  0  0  0  0  0  0  0  0  0
    2.2718   -3.8845    0.0000 C   0  0  0  0  0  0  0  0  0  0  0  0
    3.0290   -5.1793    0.0000 F   0  0  0  0  0  0  0  0  0  0  0  0
    3.5666   -3.1272    0.0000 F   0  0  0  0  0  0  0  0  0  0  0  0
    0.9769   -4.6417    0.0000 F   0  0  0  0  0  0  0  0  0  0  0  0
    2.8093   -1.8324    0.0000 C   0  0  0  0  0  0  0  0  0  0  0  0
    2.8009   -0.3324    0.0000 C   0  0  0  0  0  0  0  0  0  0  0  0
    4.0958    0.4248    0.0000 C   0  0  0  0  0  0  0  0  0  0  0  0
    5.3990   -0.3179    0.0000 C   0  0  0  0  0  0  0  0  0  0  0  0
    6.6938    0.4393    0.0000 N   0  0  3  0  0  0  0  0  0  0  0  0
    7.9970   -0.3034    0.0000 C   0  0  0  0  0  0  0  0  0  0  0  0
    9.2918    0.4539    0.0000 C   0  0  0  0  0  0  0  0  0  0  0  0
   10.5950   -0.2889    0.0000 C   0  0  0  0  0  0  0  0  0  0  0  0
   11.8899    0.4684    0.0000 C   0  0  0  0  0  0  0  0  0  0  0  0
   11.8815    1.9684    0.0000 N   0  0  0  0  0  0  0  0  0  0  0  0
   10.5783    2.7111    0.0000 C   0  0  0  0  0  0  0  0  0  0  0  0
    9.2835    1.9539    0.0000 C   0  0  0  0  0  0  0  0  0  0  0  0
    6.6854    1.9393    0.0000 C   0  0  0  0  0  0  0  0  0  0  0  0
    5.3822    2.6821    0.0000 C   0  0  0  0  0  0  0  0  0  0  0  0
    5.4074   -1.8179    0.0000 C   0  0  0  0  0  0  0  0  0  0  0  0
    4.1125   -2.5751    0.0000 C   0  0  0  0  0  0  0  0  0  0  0  0
  1  2  1  0  0  0  0
  2  3  1  0  0  0  0
  2  4  1  0  0  0  0
  2  5  1  0  0  0  0
  5  6  1  0  0  0  0
  5  7  1  0  0  0  0
  5 11  1  0  0  0  0
  7  8  1  0  0  0  0
  7  9  1  0  0  0  0
  7 10  1  0  0  0  0
 11 12  1  0  0  0  0
 11 26  2  3  0  0  0
 12 13  2  3  0  0  0
 13 14  1  0  0  0  0
 14 15  1  0  0  0  0
 14 25  2  3  0  0  0
 15 16  1  0  0  0  0
 15 23  1  0  0  0  0
 16 17  1  0  0  0  0
 17 18  1  0  0  0  0
 17 22  2  3  0  0  0
 18 19  2  3  0  0  0
 19 20  1  0  0  0  0
 20 21  2  3  0  0  0
 21 22  1  0  0  0  0
 23 24  1  0  0  0  0
 25 26  1  0  0  0  0
M  END
>  <VC-4>
0.054948311

>  <VC-6>
0.05209782

>  <SPC-4>
7.5446978

>  <SwHBa>
10.250638

>  <SHCsats>
1.0608572

>  <SHother>
5.053165

>  <SssCH2>
0.88061035

>  <ETA_Shape_Y>
0.16744

>  <ETA_dBetaP>
-0.28845999

>  <nAtomP>
7

>  <MDEC-24>
5.4001937

>  <MDEC-33>
0.79370052

>  <MDEC-34>
2.3471363

>  <MLFER_A>
0.85399997

>  <Classification>
0

$$$$
FC(F)(F)c1noc2c1ccc(OCCCN(C)c1ccc(cc1)C(=O)[O-])c2CCC
  MOE2013           2D

 31 33  0  0  1  0  0  0  0  0999 V2000
    0.0000    0.0000    0.0000 F   0  0  0  0  0  0  0  0  0  0  0  0
    0.7486   -1.2999    0.0000 C   0  0  0  0  0  0  0  0  0  0  0  0
    2.0484   -0.5513    0.0000 F   0  0  0  0  0  0  0  0  0  0  0  0
   -0.5513   -2.0484    0.0000 F   0  0  0  0  0  0  0  0  0  0  0  0
    1.4972   -2.5997    0.0000 C   0  0  0  0  0  0  0  0  0  0  0  0
    0.8855   -3.9694    0.0000 N   0  0  0  0  0  0  0  0  0  0  0  0
    1.9992   -4.9743    0.0000 O   0  0  0  0  0  0  0  0  0  0  0  0
    3.2990   -4.2257    0.0000 C   0  0  0  0  0  0  0  0  0  0  0  0
    2.9888   -2.7581    0.0000 C   0  0  0  0  0  0  0  0  0  0  0  0
    4.1046   -1.7557    0.0000 C   0  0  0  0  0  0  0  0  0  0  0  0
    5.5307   -2.2208    0.0000 C   0  0  0  0  0  0  0  0  0  0  0  0
    5.8409   -3.6883    0.0000 C   0  0  0  0  0  0  0  0  0  0  0  0
    7.2670   -4.1534    0.0000 O   0  0  0  0  0  0  0  0  0  0  0  0
    8.3828   -3.1509    0.0000 C   0  0  0  0  0  0  0  0  0  0  0  0
    9.8089   -3.6160    0.0000 C   0  0  0  0  0  0  0  0  0  0  0  0
   10.9247   -2.6135    0.0000 C   0  0  0  0  0  0  0  0  0  0  0  0
   12.3508   -3.0786    0.0000 N   0  0  3  0  0  0  0  0  0  0  0  0
   12.6610   -4.5462    0.0000 C   0  0  0  0  0  0  0  0  0  0  0  0
   13.4666   -2.0762    0.0000 C   0  0  0  0  0  0  0  0  0  0  0  0
   14.8927   -2.5412    0.0000 C   0  0  0  0  0  0  0  0  0  0  0  0
   16.0085   -1.5388    0.0000 C   0  0  0  0  0  0  0  0  0  0  0  0
   15.6982   -0.0712    0.0000 C   0  0  0  0  0  0  0  0  0  0  0  0
   14.2721    0.3939    0.0000 C   0  0  0  0  0  0  0  0  0  0  0  0
   13.1563   -0.6086    0.0000 C   0  0  0  0  0  0  0  0  0  0  0  0
   16.8140    0.9313    0.0000 C   0  0  0  0  0  0  0  0  0  0  0  0
   16.5038    2.3988    0.0000 O   0  0  0  0  0  0  0  0  0  0  0  0
   18.2401    0.4662    0.0000 O   0  5  0  0  0  0  0  0  0  0  0  0
    4.7251   -4.6908    0.0000 C   0  0  0  0  0  0  0  0  0  0  0  0
    5.0354   -6.1584    0.0000 C   0  0  0  0  0  0  0  0  0  0  0  0
    3.9195   -7.1608    0.0000 C   0  0  0  0  0  0  0  0  0  0  0  0
    4.2298   -8.6284    0.0000 C   0  0  0  0  0  0  0  0  0  0  0  0
  1  2  1  0  0  0  0
  2  3  1  0  0  0  0
  2  4  1  0  0  0  0
  2  5  1  0  0  0  0
  5  6  2  3  0  0  0
  5  9  1  0  0  0  0
  6  7  1  0  0  0  0
  7  8  1  0  0  0  0
  8  9  1  0  0  0  0
  8 28  2  3  0  0  0
  9 10  2  3  0  0  0
 10 11  1  0  0  0  0
 11 12  2  3  0  0  0
 12 13  1  0  0  0  0
 12 28  1  0  0  0  0
 13 14  1  0  0  0  0
 14 15  1  0  0  0  0
 15 16  1  0  0  0  0
 16 17  1  0  0  0  0
 17 18  1  0  0  0  0
 17 19  1  0  0  0  0
 19 20  1  0  0  0  0
 19 24  2  3  0  0  0
 20 21  2  3  0  0  0
 21 22  1  0  0  0  0
 22 23  2  3  0  0  0
 22 25  1  0  0  0  0
 23 24  1  0  0  0  0
 25 26  2  0  0  0  0
 25 27  1  0  0  0  0
 28 29  1  0  0  0  0
 29 30  1  0  0  0  0
 30 31  1  0  0  0  0
M  CHG  1  27  -1
M  END
>  <VC-4>
0.013498731

>  <VC-6>
0.0030184081

>  <SPC-4>
5.555634

>  <SwHBa>
9.0231285

>  <SHCsats>
3.5076823

>  <SHother>
3.570667

>  <SssCH2>
2.8462543

>  <ETA_Shape_Y>
0.3145

>  <ETA_dBetaP>
-0.25

>  <nAtomP>
10

>  <MDEC-24>
1.4607507

>  <MDEC-33>
6.0712886

>  <MDEC-34>
1.6700937

>  <MLFER_A>
0.24600001

>  <Classification>
0

$$$$
Clc1cc(ccc1N(Cc1ncsc1)CC)C(O)(C(F)(F)F)C(F)(F)F
  MOE2013           2D

 26 27  0  0  1  0  0  0  0  0999 V2000
   -0.0000    0.0000    0.0000 Cl  0  0  0  0  0  0  0  0  0  0  0  0
   -0.7577    1.2946    0.0000 C   0  0  0  0  0  0  0  0  0  0  0  0
   -2.2577    1.2857    0.0000 C   0  0  0  0  0  0  0  0  0  0  0  0
   -3.0153    2.5803    0.0000 C   0  0  0  0  0  0  0  0  0  0  0  0
   -2.2730    3.8837    0.0000 C   0  0  0  0  0  0  0  0  0  0  0  0
   -0.7731    3.8926    0.0000 C   0  0  0  0  0  0  0  0  0  0  0  0
   -0.0154    2.5980    0.0000 C   0  0  0  0  0  0  0  0  0  0  0  0
    1.4846    2.6069    0.0000 N   0  0  3  0  0  0  0  0  0  0  0  0
    2.2423    1.3123    0.0000 C   0  0  0  0  0  0  0  0  0  0  0  0
    3.7422    1.3212    0.0000 C   0  0  0  0  0  0  0  0  0  0  0  0
    4.6167    2.5399    0.0000 N   0  0  0  0  0  0  0  0  0  0  0  0
    6.0460    2.0849    0.0000 C   0  0  0  0  0  0  0  0  0  0  0  0
    6.0549    0.5849    0.0000 S   0  0  0  0  0  0  0  0  0  0  0  0
    4.6311    0.1129    0.0000 C   0  0  0  0  0  0  0  0  0  0  0  0
    2.2269    3.9104    0.0000 C   0  0  0  0  0  0  0  0  0  0  0  0
    1.4692    5.2049    0.0000 C   0  0  0  0  0  0  0  0  0  0  0  0
   -4.5153    2.5714    0.0000 C   0  0  0  0  0  0  0  0  0  0  0  0
   -6.0153    2.5625    0.0000 O   0  0  0  0  0  0  0  0  0  0  0  0
   -4.5242    4.0714    0.0000 C   0  0  0  0  0  0  0  0  0  0  0  0
   -4.5331    5.5713    0.0000 F   0  0  0  0  0  0  0  0  0  0  0  0
   -3.0242    4.0802    0.0000 F   0  0  0  0  0  0  0  0  0  0  0  0
   -6.0242    4.0625    0.0000 F   0  0  0  0  0  0  0  0  0  0  0  0
   -4.5064    1.0714    0.0000 C   0  0  0  0  0  0  0  0  0  0  0  0
   -3.0064    1.0803    0.0000 F   0  0  0  0  0  0  0  0  0  0  0  0
   -4.4975   -0.4286    0.0000 F   0  0  0  0  0  0  0  0  0  0  0  0
   -6.0064    1.0625    0.0000 F   0  0  0  0  0  0  0  0  0  0  0  0
  1  2  1  0  0  0  0
  2  3  1  0  0  0  0
  2  7  2  3  0  0  0
  3  4  2  3  0  0  0
  4  5  1  0  0  0  0
  4 17  1  0  0  0  0
  5  6  2  3  0  0  0
  6  7  1  0  0  0  0
  7  8  1  0  0  0  0
  8  9  1  0  0  0  0
  8 15  1  0  0  0  0
  9 10  1  0  0  0  0
 10 11  1  0  0  0  0
 10 14  2  3  0  0  0
 11 12  2  3  0  0  0
 12 13  1  0  0  0  0
 13 14  1  0  0  0  0
 15 16  1  0  0  0  0
 17 18  1  0  0  0  0
 17 19  1  0  0  0  0
 17 23  1  0  0  0  0
 19 20  1  0  0  0  0
 19 21  1  0  0  0  0
 19 22  1  0  0  0  0
 23 24  1  0  0  0  0
 23 25  1  0  0  0  0
 23 26  1  0  0  0  0
M  END
>  <VC-4>
0.054948311

>  <VC-6>
0.05209782

>  <SPC-4>
7.9927535

>  <SwHBa>
7.4212251

>  <SHCsats>
1.0468626

>  <SHother>
2.9852052

>  <SssCH2>
0.99616599

>  <ETA_Shape_Y>
0.20175999

>  <ETA_dBetaP>
-0.35576999

>  <nAtomP>
7

>  <MDEC-24>
4.1017294

>  <MDEC-33>
2.1822472

>  <MDEC-34>
3.1717551

>  <MLFER_A>
0.85399997

>  <Classification>
1

$$$$
FC(F)(F)c1c2ncc(Cc3ccccc3)c(c2ccc1)-c1cc(Oc2cc(ccc2)C(=O)NCCC)ccc1
  MOE2013           2D

 40 44  0  0  0  0  0  0  0  0999 V2000
    0.0000    0.0000    0.0000 F   0  0  0  0  0  0  0  0  0  0  0  0
   -0.7537   -1.2969    0.0000 C   0  0  0  0  0  0  0  0  0  0  0  0
   -1.5075   -2.5938    0.0000 F   0  0  0  0  0  0  0  0  0  0  0  0
   -2.0506   -0.5431    0.0000 F   0  0  0  0  0  0  0  0  0  0  0  0
    0.5431   -2.0506    0.0000 C   0  0  0  0  0  0  0  0  0  0  0  0
    0.5388   -3.5506    0.0000 C   0  0  0  0  0  0  0  0  0  0  0  0
   -0.7624   -4.2969    0.0000 N   0  0  0  0  0  0  0  0  0  0  0  0
   -0.7667   -5.7969    0.0000 C   0  0  0  0  0  0  0  0  0  0  0  0
    0.5302   -6.5506    0.0000 C   0  0  0  0  0  0  0  0  0  0  0  0
    0.5259   -8.0506    0.0000 C   0  0  0  0  0  0  0  0  0  0  0  0
   -0.7753   -8.7968    0.0000 C   0  0  0  0  0  0  0  0  0  0  0  0
   -0.7796  -10.2968    0.0000 C   0  0  0  0  0  0  0  0  0  0  0  0
   -2.0808  -11.0431    0.0000 C   0  0  0  0  0  0  0  0  0  0  0  0
   -3.3777  -10.2894    0.0000 C   0  0  0  0  0  0  0  0  0  0  0  0
   -3.3734   -8.7894    0.0000 C   0  0  0  0  0  0  0  0  0  0  0  0
   -2.0722   -8.0431    0.0000 C   0  0  0  0  0  0  0  0  0  0  0  0
    1.8314   -5.8043    0.0000 C   0  0  0  0  0  0  0  0  0  0  0  0
    1.8357   -4.3043    0.0000 C   0  0  0  0  0  0  0  0  0  0  0  0
    3.1369   -3.5581    0.0000 C   0  0  0  0  0  0  0  0  0  0  0  0
    3.1412   -2.0581    0.0000 C   0  0  0  0  0  0  0  0  0  0  0  0
    1.8443   -1.3043    0.0000 C   0  0  0  0  0  0  0  0  0  0  0  0
    3.1283   -6.5581    0.0000 C   0  0  0  0  0  0  0  0  0  0  0  0
    4.4295   -5.8118    0.0000 C   0  0  0  0  0  0  0  0  0  0  0  0
    5.7263   -6.5655    0.0000 C   0  0  0  0  0  0  0  0  0  0  0  0
    7.0275   -5.8193    0.0000 O   0  0  0  0  0  0  0  0  0  0  0  0
    8.3244   -6.5730    0.0000 C   0  0  0  0  0  0  0  0  0  0  0  0
    9.6256   -5.8267    0.0000 C   0  0  0  0  0  0  0  0  0  0  0  0
   10.9225   -6.5805    0.0000 C   0  0  0  0  0  0  0  0  0  0  0  0
   10.9182   -8.0805    0.0000 C   0  0  0  0  0  0  0  0  0  0  0  0
    9.6170   -8.8267    0.0000 C   0  0  0  0  0  0  0  0  0  0  0  0
    8.3201   -8.0730    0.0000 C   0  0  0  0  0  0  0  0  0  0  0  0
   12.2237   -5.8342    0.0000 C   0  0  0  0  0  0  0  0  0  0  0  0
   13.5205   -6.5879    0.0000 O   0  0  0  0  0  0  0  0  0  0  0  0
   12.2280   -4.3342    0.0000 N   0  0  0  0  0  0  0  0  0  0  0  0
   13.5292   -3.5880    0.0000 C   0  0  0  0  0  0  0  0  0  0  0  0
   13.5335   -2.0880    0.0000 C   0  0  0  0  0  0  0  0  0  0  0  0
   14.8347   -1.3417    0.0000 C   0  0  0  0  0  0  0  0  0  0  0  0
    5.7220   -8.0655    0.0000 C   0  0  0  0  0  0  0  0  0  0  0  0
    4.4208   -8.8118    0.0000 C   0  0  0  0  0  0  0  0  0  0  0  0
    3.1240   -8.0581    0.0000 C   0  0  0  0  0  0  0  0  0  0  0  0
  1  2  1  0  0  0  0
  2  3  1  0  0  0  0
  2  4  1  0  0  0  0
  2  5  1  0  0  0  0
  5  6  1  0  0  0  0
  5 21  2  3  0  0  0
  6  7  1  0  0  0  0
  6 18  2  3  0  0  0
  7  8  2  3  0  0  0
  8  9  1  0  0  0  0
  9 10  1  0  0  0  0
  9 17  2  3  0  0  0
 10 11  1  0  0  0  0
 11 12  1  0  0  0  0
 11 16  2  3  0  0  0
 12 13  2  3  0  0  0
 13 14  1  0  0  0  0
 14 15  2  3  0  0  0
 15 16  1  0  0  0  0
 17 18  1  0  0  0  0
 17 22  1  0  0  0  0
 18 19  1  0  0  0  0
 19 20  2  3  0  0  0
 20 21  1  0  0  0  0
 22 23  1  0  0  0  0
 22 40  2  3  0  0  0
 23 24  2  3  0  0  0
 24 25  1  0  0  0  0
 24 38  1  0  0  0  0
 25 26  1  0  0  0  0
 26 27  1  0  0  0  0
 26 31  2  3  0  0  0
 27 28  2  3  0  0  0
 28 29  1  0  0  0  0
 28 32  1  0  0  0  0
 29 30  2  3  0  0  0
 30 31  1  0  0  0  0
 32 33  2  0  0  0  0
 32 34  1  0  0  0  0
 34 35  1  0  0  0  0
 35 36  1  0  0  0  0
 36 37  1  0  0  0  0
 38 39  2  3  0  0  0
 39 40  1  0  0  0  0
M  END
>  <VC-4>
0.013498731

>  <VC-6>
0.0038967479

>  <SPC-4>
5.9993095

>  <SwHBa>
33.474648

>  <SHCsats>
1.3492726

>  <SHother>
9.5561218

>  <SssCH2>
1.9005122

>  <ETA_Shape_Y>
0.29218

>  <ETA_dBetaP>
-0.050000001

>  <nAtomP>
26

>  <MDEC-24>
2.7536671

>  <MDEC-33>
13.902684

>  <MDEC-34>
2.268039

>  <MLFER_A>
0.37099999

>  <Classification>
1

$$$$
Clc1c2nnc(Cc3ccccc3)c(c2ccc1)-c1cc(NCc2c3n(ccc3ccc2)C)ccc1
  MOE2013           2D

 36 41  0  0  0  0  0  0  0  0999 V2000
    0.0000    0.0000    0.0000 Cl  0  0  0  0  0  0  0  0  0  0  0  0
    0.7441    1.3024    0.0000 C   0  0  0  0  0  0  0  0  0  0  0  0
   -0.0118    2.5980    0.0000 C   0  0  0  0  0  0  0  0  0  0  0  0
   -1.5118    2.5912    0.0000 N   0  0  0  0  0  0  0  0  0  0  0  0
   -2.2677    3.8869    0.0000 N   0  0  0  0  0  0  0  0  0  0  0  0
   -1.5236    5.1893    0.0000 C   0  0  0  0  0  0  0  0  0  0  0  0
   -2.2795    6.4849    0.0000 C   0  0  0  0  0  0  0  0  0  0  0  0
   -3.7795    6.4781    0.0000 C   0  0  0  0  0  0  0  0  0  0  0  0
   -4.5236    5.1757    0.0000 C   0  0  0  0  0  0  0  0  0  0  0  0
   -6.0235    5.1688    0.0000 C   0  0  0  0  0  0  0  0  0  0  0  0
   -6.7794    6.4645    0.0000 C   0  0  0  0  0  0  0  0  0  0  0  0
   -6.0353    7.7669    0.0000 C   0  0  0  0  0  0  0  0  0  0  0  0
   -4.5354    7.7737    0.0000 C   0  0  0  0  0  0  0  0  0  0  0  0
   -0.0236    5.1961    0.0000 C   0  0  0  0  0  0  0  0  0  0  0  0
    0.7323    3.9005    0.0000 C   0  0  0  0  0  0  0  0  0  0  0  0
    2.2323    3.9073    0.0000 C   0  0  0  0  0  0  0  0  0  0  0  0
    2.9882    2.6117    0.0000 C   0  0  0  0  0  0  0  0  0  0  0  0
    2.2441    1.3092    0.0000 C   0  0  0  0  0  0  0  0  0  0  0  0
    0.7205    6.4985    0.0000 C   0  0  0  0  0  0  0  0  0  0  0  0
    2.2205    6.5053    0.0000 C   0  0  0  0  0  0  0  0  0  0  0  0
    2.9646    7.8078    0.0000 C   0  0  0  0  0  0  0  0  0  0  0  0
    4.4645    7.8146    0.0000 N   0  0  0  0  0  0  0  0  0  0  0  0
    5.2086    9.1170    0.0000 C   0  0  0  0  0  0  0  0  0  0  0  0
    6.7086    9.1238    0.0000 C   0  0  0  0  0  0  0  0  0  0  0  0
    7.4527   10.4263    0.0000 C   0  0  0  0  0  0  0  0  0  0  0  0
    6.9827   11.8507    0.0000 N   0  0  0  0  0  0  0  0  0  0  0  0
    8.1922   12.7379    0.0000 C   0  0  0  0  0  0  0  0  0  0  0  0
    9.4097   11.8618    0.0000 C   0  0  0  0  0  0  0  0  0  0  0  0
    8.9527   10.4331    0.0000 C   0  0  0  0  0  0  0  0  0  0  0  0
    9.7086    9.1375    0.0000 C   0  0  0  0  0  0  0  0  0  0  0  0
    8.9645    7.8350    0.0000 C   0  0  0  0  0  0  0  0  0  0  0  0
    7.4645    7.8282    0.0000 C   0  0  0  0  0  0  0  0  0  0  0  0
    5.5540   12.3078    0.0000 C   0  0  0  0  0  0  0  0  0  0  0  0
    2.2087    9.1034    0.0000 C   0  0  0  0  0  0  0  0  0  0  0  0
    0.7087    9.0966    0.0000 C   0  0  0  0  0  0  0  0  0  0  0  0
   -0.0354    7.7941    0.0000 C   0  0  0  0  0  0  0  0  0  0  0  0
  1  2  1  0  0  0  0
  2  3  1  0  0  0  0
  2 18  2  3  0  0  0
  3  4  1  0  0  0  0
  3 15  2  3  0  0  0
  4  5  2  3  0  0  0
  5  6  1  0  0  0  0
  6  7  1  0  0  0  0
  6 14  2  3  0  0  0
  7  8  1  0  0  0  0
  8  9  1  0  0  0  0
  8 13  2  3  0  0  0
  9 10  2  3  0  0  0
 10 11  1  0  0  0  0
[truncated: 237,806 more chars]
